# Supplementary material for: Pan-Cancer Profiling of Intron Retention and Its Clinical Significance in Diagnosis and Prognosis
Source: Preprints.org preprint supplement (doi:10.20944/preprints202308.2025.v1), 2023-08-30
Supplement: Supplementary file 1 [file supplementary]

## Sheet: Table S1
Table S1. Statistics of samples across 33 cancer types.
Note: #Average RIs of tumor or normal (sd) denotes the average number of retained introns (IRratio > 0.1) in tumor or normal samples for each cancer type, respectively, and number in parenthesis is standard deviation.
Abbr.	Cancer	#Patients	#Tumor samples	#Average RIs of tumor (sd)	#Normal samples	#Average RIs of normal (sd)	Average sequencing depth (Gbp)	Paired end read length (bp)
ACC	Adrenocortical Carcinoma	79	79	1845(1094)	0		5.43636	48
BLCA	Bladder Urothelial Carcinoma	401	401	2524(1793)	18	1349(1132)	5.68964	48
BRCA	Breast Invasive Carcinoma	1058	1054	2131(2078)	113	2446(1412)	7.0899	48 or 50
CESC	Cervical Squamous Cell Carcinoma and Endocervical Adenocarcinoma	295	295	2439(1369)	3	1053(587)	6.37046	48
CHOL	Cholangiocarcinoma	35	35	2912(1395)	9	843(462)	5.14101	48
COAD	Colon Adenocarcinoma	453	450	1615(1353)	41	1063(776)	4.28862	48 or 76
DLBC	Lymphoid Neoplasm Diffuse Large B-cell Lymphoma	48	48	1603(1232)	0		5.3488	48
ESCA	Esophageal Carcinoma	159	155	6859(4472)	11	6756(5498)	13.8315	75
GBM	Glioblastoma Multiforme	158	153	2816(1983)	5	3019(698)	7.2438	76
HNSC	Head and Neck Squamous Carcinoma	474	470	1087(852)	44	555(343)	6.40429	48
KICH	Kidney Chromophobe	66	65	1421(558)	24	1252(433)	7.60918	48
KIRC	Kidney Renal Clear Cell Carcinoma	519	518	3533(3219)	72	910(435)	7.39808	48
KIRP	Kidney Renal Papillary Cell Carcinoma	287	286	2791(2266)	32	1383(1093)	6.25977	48 or 50
LAML	Acute Myeloid Leukemia	147	147	27148(6570)	0		6.0772	50
LGG	Brain Lower Grade Glioma	512	512	3200(1675)	0		6.5609	48
LIHC	Liver Hepatocellular Carcinoma	370	370	1138(846)	50	413(248)	5.8561	48
LUAD	Lung Adenocarcinoma	461	450	2885(2270)	59	1442(1061)	5.86166	48
LUSC	Lung Squamous Cell Carcinoma	441	435	2714(1929)	46	2117(1310)	6.64457	48
MESO	Mesothelioma	85	85	1928(1046)	0		5.85678	48
OV	Ovarian Serous Cystadenocarcinoma	364	364	3561(2290)	0		11.3982	75
PAAD	Pancreatic Adenocarcinoma	177	177	2770(1677)	4	3784(2844)	5.67131	48
PCPG	Pheochromocytoma and Paraganglioma	178	178	2123(1384)	3	1521(590)	5.81754	48
PRAD	Prostate Adenocarcinoma	495	495	1695(1043)	49	1149(937)	6.20153	48
READ	Rectum Adenocarcinoma	165	164	1667(1200)	10	851(377)	4.22048	48 or 76
SARC	Sarcoma	254	254	1567(1078)	2	461(208)	5.76139	48
SKCM	Skin Cutaneous Melanoma	102	101	1789(1360)	1	1214(NA)	6.56224	48
STAD	Stomach Adenocarcinoma	351	348	4705(4133)	18	2671(1755)	11.7322	75
TGCT	Testicular Germ Cell Tumors	142	142	2617(1280)	0		5.40809	48
THCA	Thyroid Carcinoma	477	475	2075(1505)	55	2447(1314)	7.39013	48
THYM	Thymoma	117	117	2266(1341)	2	5842(800)	5.79054	48
UCEC	Uterine Corpus Endometrial Carcinoma	539	526	1243(935)	35	1569(1072)	3.43548	48 or 76
UCS	Uterine Carcinosarcoma	55	55	1963(1181)	0		5.76365	48
UVM	Uveal Melanoma	79	79	1064(1068)	0		5.51756	48
	In total	9543	9483		706

## Sheet: Table S2
Table S2. Differentially retained introns in 14 cancers.
Note: The difference between the median IRratio of tumor and normal samples is presented for each cancer, and NA represents that the paired Wilcoxon test result is non-significant.
Chr	Start	End	Gene	#Cancers showing upregulation	#Cancers showing downregulation	BLCA	COAD	KICH	KIRP	LUAD	PRAD	THCA	BRCA	HNSC	KIRC	LIHC	LUSC	STAD	UCEC
chr4	170069230	170070586	AADAT	1	1	NA	NA	NA	NA	NA	0.0229621	0.107877	-0.1256	NA	NA	NA	NA	NA	NA
chr7	122098866	122101370	AASS	1	1	NA	NA	NA	NA	NA	NA	NA	NA	NA	0.126203	-0.004275	-0.108951	NA	NA
chr7	122101438	122101620	AASS	0	1	NA	NA	NA	NA	NA	NA	NA	-0.025804	NA	NA	NA	-0.143397	NA	NA
chr9	137023052	137024142	ABCA2	1	0	NA	NA	0.138322	NA	NA	NA	NA	NA	NA	NA	NA	NA	NA	NA
chr9	137023052	137023837	ABCA2	1	0	NA	NA	0.182152	NA	NA	NA	NA	NA	NA	NA	NA	NA	NA	NA
chr17	69088258	69089464	ABCA6	0	1	NA	NA	NA	NA	NA	NA	NA	-0.129319	NA	NA	NA	NA	NA	NA
chr17	69133867	69134638	ABCA6	0	1	NA	NA	NA	NA	NA	NA	NA	-0.106227	NA	NA	NA	NA	NA	NA
chr19	1042397	1042745	ABCA7	1	0	NA	NA	NA	NA	NA	NA	NA	NA	0.0780355	NA	NA	0.119273	NA	NA
chr7	73738463	73738645	ABHD11	1	0	NA	0.0454934	NA	NA	NA	-0.0140795	NA	-0.0745175	NA	NA	NA	NA	NA	0.12399
chr19	1881804	1885351	ABHD17A	0	2	NA	NA	NA	NA	NA	NA	NA	-0.140967	NA	NA	NA	-0.133135	NA	NA
chr9	133256356	133257408	ABO	1	0	NA	0.099164	NA	NA	NA	NA	0.0459925	NA	0.0992775	NA	NA	0.063541	0.131986	NA
chr9	133257542	133258096	ABO	1	0	NA	0.16912	NA	-0.0169276	NA	NA	-0.00263	NA	NA	0.098503	NA	NA	0.0571885	NA
chr11	34154378	34154700	ABTB2	0	1	NA	NA	NA	NA	NA	NA	-0.234892	NA	NA	NA	NA	NA	NA	NA
chr7	30872306	30875494	AC004691.2	1	0	NA	NA	0.162429	NA	NA	NA	NA	0.0739035	NA	NA	NA	0.0677492	NA	NA
chr7	149295183	149297050	AC004890.2	1	0	NA	NA	NA	NA	NA	NA	NA	0.130334	NA	NA	NA	NA	NA	NA
chr3	119703222	119706808	AC069444.2	1	0	NA	NA	NA	NA	NA	NA	0.104583	NA	NA	NA	NA	NA	NA	NA
chr15	41308624	41308719	AC087721.2	2	0	NA	NA	NA	NA	NA	NA	NA	0.275862	NA	NA	NA	0.269142	NA	NA
chr3	49421572	49422103	AC104452.1	2	0	NA	NA	NA	NA	NA	NA	NA	0.11609	NA	NA	NA	NA	0.159455	NA
chr3	197614622	197615563	AC132008.2	2	0	NA	NA	0.154034	NA	NA	NA	NA	NA	NA	NA	NA	NA	0.144218	NA
chr11	134256648	134257087	ACAD8	0	1	NA	NA	NA	NA	NA	-0.110573	0.020654	-0.0912053	NA	NA	NA	NA	NA	NA
chr11	134259084	134259607	ACAD8	0	1	NA	NA	NA	NA	0.0702285	-0.12196	NA	-0.0677704	NA	NA	NA	NA	NA	NA
chr17	7222081	7222176	ACADVL	2	0	NA	0.245409	NA	NA	NA	NA	NA	-0.020878	0.0307145	0.0477173	0.0262703	NA	0.055205	0.111783
chr17	7222865	7223132	ACADVL	3	0	0.166321	0.238442	NA	0.041709	0.0661555	0.028679	NA	-0.038904	0.0691979	0.0756641	0.044453	NA	NA	0.127613
chr17	7342474	7343378	ACAP1	0	1	NA	NA	NA	NA	NA	NA	NA	-0.109431	NA	NA	NA	NA	NA	NA
chr17	7350054	7350126	ACAP1	0	5	NA	NA	NA	-0.200421	-0.124918	NA	-0.321227	-0.250665	NA	NA	NA	NA	-0.289681	NA
chr1	1299356	1299830	ACAP3	3	0	0.0779215	0.139586	0.133668	NA	NA	NA	NA	-0.0423785	NA	0.062674	NA	NA	0.1417	0.067244
chr17	45139160	45143442	ACBD4	1	0	NA	0.0919012	0.0992036	NA	NA	NA	NA	NA	NA	NA	NA	NA	0.123725	NA
chr11	44077922	44078683	ACCS	1	0	0.100983	NA	NA	NA	NA	NA	0.0719025	-0.080923	NA	0.085187	NA	NA	NA	NA
chr11	44078784	44079530	ACCS	1	0	0.070363	NA	0.098734	NA	NA	NA	NA	NA	NA	0.0337905	0.110585	0.0654535	NA	NA
chr3	58534145	58534359	ACOX2	0	1	NA	NA	NA	NA	NA	NA	NA	-0.204848	NA	NA	0.0274756	NA	NA	NA
chr3	58534522	58534946	ACOX2	0	1	NA	NA	NA	NA	NA	NA	0.0333867	-0.122796	NA	NA	NA	NA	NA	NA
chr16	20437179	20437267	ACSM5	0	2	NA	NA	NA	-0.130958	NA	NA	NA	NA	NA	-0.173394	0.0312039	NA	NA	NA
chr1	155061489	155061903	ADAM15	0	2	NA	0.0818866	NA	-0.0761515	-0.0433589	NA	NA	-0.169689	NA	NA	NA	-0.0327498	NA	-0.155351
chr2	9497248	9502172	ADAM17	0	1	NA	NA	NA	-0.0480742	NA	0.0147095	-0.0345594	-0.0213236	NA	-0.0362903	NA	-0.0172448	-0.138905	NA
chr19	8589585	8589888	ADAMTS10	1	0	NA	NA	NA	NA	NA	NA	NA	NA	NA	0.170994	NA	NA	NA	NA
chr1	161194221	161195464	ADAMTS4	0	1	NA	NA	NA	NA	NA	NA	NA	-0.10875	NA	NA	NA	NA	NA	NA
chr1	150553253	150553425	ADAMTSL4	0	1	NA	NA	NA	NA	0.0704764	NA	-0.133584	NA	NA	NA	NA	-0.0417404	0.0684535	NA
chr1	150557623	150557944	ADAMTSL4	0	1	NA	NA	NA	NA	NA	NA	NA	-0.162451	NA	NA	NA	NA	NA	NA
chr1	150558149	150558472	ADAMTSL4	1	0	0.107149	NA	NA	NA	0.0877488	NA	NA	NA	NA	NA	NA	NA	0.058785	NA
chr14	24330018	24330167	ADCY4	0	1	NA	NA	NA	NA	NA	NA	NA	-0.175109	NA	NA	NA	NA	NA	NA
chr14	24330295	24331017	ADCY4	0	1	NA	NA	NA	NA	NA	NA	NA	-0.128288	NA	NA	NA	NA	NA	NA
chr14	24331356	24331787	ADCY4	0	1	NA	NA	NA	NA	NA	NA	NA	-0.153075	NA	NA	NA	NA	NA	NA
chr17	78205190	78205439	AFMID	1	0	NA	0.158219	NA	0.0656235	0.071251	NA	NA	NA	NA	0.0859395	0.0888045	0.098764	NA	NA
chr1	35826835	35831426	AGO4	1	0	NA	NA	NA	NA	NA	NA	NA	NA	NA	NA	NA	NA	0.145441	NA
chr6	161153499	161154148	AGPAT4	0	1	NA	NA	NA	NA	NA	NA	NA	-0.107432	NA	NA	NA	NA	NA	NA
chr2	61185618	61186445	AHSA2P	2	2	NA	-0.143999	0.315254	0.147075	NA	0.0254095	0.060882	-0.10517	NA	0.0033835	NA	NA	NA	NA
chr6	169633068	169634427	AL031315.1	0	1	NA	NA	NA	NA	NA	NA	-0.114947	NA	NA	NA	NA	NA	NA	NA
chr20	43458509	43459770	AL031681.3	1	0	NA	NA	0.115518	0.0353004	NA	0.0453377	NA	-0.024208	NA	0.0493476	NA	-0.0306506	NA	NA
chr9	34655317	34655604	AL162231.3	1	0	NA	NA	NA	NA	NA	0.0298544	0.019889	NA	NA	NA	NA	0.112627	NA	NA
chr1	247200193	247202015	AL390728.4	1	0	NA	NA	NA	NA	NA	NA	0.077085	-0.091824	NA	NA	NA	NA	0.232747	NA
chrX	111711725	111712483	ALG13	1	0	NA	NA	NA	NA	NA	NA	0.100009	NA	NA	NA	NA	NA	NA	NA
chr2	286203	286289	ALKAL2	0	1	NA	NA	NA	NA	NA	NA	NA	NA	NA	-0.119626	NA	NA	NA	NA
chr3	46679287	46680429	ALS2CL	2	0	NA	0.126415	0.084172	NA	0.099902	NA	0.0391515	NA	NA	NA	NA	0.0923375	0.121271	NA
chr3	46680541	46681245	ALS2CL	1	0	NA	0.092762	0.0860768	NA	0.141612	NA	0.0227942	NA	NA	NA	NA	NA	NA	NA
chr16	2527985	2528059	AMDHD2	0	1	NA	NA	NA	-0.0416815	NA	NA	-0.104829	0	NA	NA	NA	NA	NA	NA
chr16	2528380	2528451	AMDHD2	0	1	NA	NA	NA	-0.0528808	NA	0.0181428	-0.104508	NA	NA	0	NA	NA	NA	NA
chr16	2528718	2528993	AMDHD2	0	1	NA	NA	NA	NA	NA	NA	-0.105773	-0.0170815	NA	-0.0195635	NA	NA	NA	NA
chr14	102928975	102929120	AMN	3	0	NA	0.249159	NA	NA	NA	NA	NA	NA	0.130376	NA	0.0519452	0.14523	NA	NA
chr9	137186356	137187480	ANAPC2	0	1	NA	0.0962215	0.081615	0.030796	NA	NA	NA	-0.116574	NA	0.0497186	NA	-0.092737	NA	-0.0442455
chr2	240479655	240480936	ANKMY1	2	0	NA	NA	NA	NA	0.172713	NA	NA	-0.0444005	NA	NA	NA	0.151317	NA	NA
chr13	110893263	110906032	ANKRD10	1	0	NA	NA	0.0552399	NA	NA	0.0624443	NA	-0.0565605	NA	0.0219763	NA	NA	0.114068	NA
chr13	110893263	110894108	ANKRD10	2	0	NA	NA	0.160344	NA	NA	0.099099	0.0360715	NA	NA	0.082348	NA	NA	0.139066	NA
chr13	110893263	110900529	ANKRD10	1	0	NA	NA	0.072813	NA	NA	0.0692375	NA	NA	NA	0.0292	0.0316866	NA	0.156427	NA
chr13	110894202	110894284	ANKRD10	3	0	NA	NA	0.203672	NA	NA	0.165151	NA	NA	NA	0.121653	NA	NA	NA	NA
chr11	67299124	67299529	ANKRD13D	1	0	0.105016	NA	NA	0.037887	0.0336785	NA	NA	-0.031914	NA	NA	NA	0.0502545	0.0900109	NA
chr2	219234288	219234825	ANKZF1	1	0	NA	0.081588	NA	NA	NA	0.028396	NA	-0.09453	NA	0.070871	-0.025866	-0.039933	NA	0.148838
chr2	219235312	219235473	ANKZF1	0	1	NA	0.0464365	NA	NA	NA	NA	NA	-0.12226	NA	0.053141	NA	-0.0505315	NA	NA
chr2	219235585	219235707	ANKZF1	0	2	NA	NA	NA	NA	NA	NA	NA	-0.142838	NA	0.0326645	NA	-0.115378	NA	NA
chr19	17327345	17327437	ANO8	0	1	NA	NA	NA	NA	NA	NA	NA	-0.13099	NA	NA	NA	NA	NA	NA
chr19	17327569	17327688	ANO8	0	1	NA	NA	NA	NA	0	NA	NA	-0.252628	NA	NA	NA	NA	NA	NA
chr11	418589	418719	ANO9	1	0	NA	0.0981722	NA	NA	0.118002	NA	NA	NA	NA	NA	NA	NA	NA	NA
chr11	418813	418887	ANO9	2	0	NA	0.150126	NA	NA	NA	NA	NA	NA	NA	0.159153	NA	NA	NA	NA
chr11	419729	420462	ANO9	2	1	NA	0.267075	NA	NA	NA	NA	NA	-0.137522	NA	NA	NA	0.172241	NA	NA
chr11	420615	420717	ANO9	1	0	NA	0.105871	NA	NA	NA	NA	NA	NA	NA	NA	NA	NA	NA	NA
chr11	429818	430082	ANO9	2	0	NA	0.125997	NA	NA	NA	NA	NA	NA	NA	0.154129	NA	NA	NA	NA
chr11	432054	433313	ANO9	1	0	NA	0.108462	NA	NA	NA	NA	NA	NA	NA	NA	NA	NA	NA	NA
chr14	23563856	23564045	AP1G2	0	1	0.024096	0.0628121	NA	NA	NA	NA	NA	-0.125707	NA	0.0798855	NA	NA	NA	NA
chr19	3759600	3759688	APBA3	1	0	NA	NA	-0.044536	NA	NA	NA	NA	NA	NA	NA	NA	NA	NA	0.104469
chr5	140562499	140562662	APBB3	1	0	NA	NA	NA	NA	NA	NA	NA	-0.006933	NA	NA	0.130213	NA	NA	NA
chr5	140562723	140563593	APBB3	2	0	NA	NA	0.139865	NA	NA	0.077607	NA	NA	NA	NA	NA	0.102807	0.0411085	NA
chr5	140563915	140564196	APBB3	1	0	NA	NA	NA	0.074048	0.019124	NA	NA	NA	NA	NA	NA	0.060213	0.131061	NA
chr14	49893157	49893255	ARF6	0	1	NA	NA	NA	NA	NA	NA	NA	-0.0862955	NA	0.084474	-0.11856	NA	NA	NA
chr13	106557131	106557558	ARGLU1	2	0	NA	NA	NA	NA	NA	NA	0.101243	NA	NA	0.145849	NA	NA	NA	NA
chr13	106557131	106559431	ARGLU1	4	3	NA	0.103602	0.196195	0.0637155	NA	0.103631	NA	-0.211069	NA	0.126548	0.031861	-0.105051	NA	-0.143223
chr1	161049334	161049423	ARHGAP30	1	1	NA	NA	NA	NA	0.0655459	NA	0.074926	NA	NA	-0.210046	NA	0.20694	NA	NA
chr1	161052797	161053257	ARHGAP30	1	0	NA	NA	NA	NA	NA	NA	NA	NA	NA	NA	NA	0.104558	NA	NA
chr20	38627215	38628926	ARHGAP40	0	1	NA	NA	NA	NA	NA	NA	NA	-0.181925	NA	NA	NA	NA	NA	NA
chr19	1083066	1083142	ARHGAP45	2	0	NA	0.033488	-0.0611548	NA	NA	0.163138	NA	0.116546	NA	NA	NA	NA	NA	NA
chr12	57474973	57475290	ARHGAP9	1	0	NA	NA	NA	NA	NA	NA	NA	-0.078005	NA	0.106341	NA	0.008077	NA	NA
chr19	41897326	41897945	ARHGEF1	4	0	0.151722	0.204044	NA	NA	0.158031	0.132401	0.017418	NA	NA	NA	NA	0.051394	NA	NA
chr3	9813111	9813247	ARPC4-TTLL3	2	0	NA	NA	0.114285	NA	NA	0.04407	0.0899605	0.035714	NA	NA	NA	0.111347	NA	NA
chr22	50627052	50627165	ARSA	1	0	NA	0.143489	NA	NA	NA	NA	NA	-0.0420956	NA	NA	NA	NA	0.0365341	0.0872487
chr22	19970743	19971215	ARVCF	1	0	NA	NA	0.119811	NA	NA	NA	NA	NA	NA	NA	NA	NA	NA	NA
chr22	19979080	19979742	ARVCF	1	0	NA	NA	0.123371	NA	NA	NA	0.0849796	-0.016429	NA	NA	NA	NA	NA	NA
chr22	19980242	19981210	ARVCF	1	0	NA	NA	NA	NA	NA	NA	0.125025	-0.02208	NA	NA	NA	NA	NA	NA
chr20	32429431	32429900	ASXL1	1	0	NA	NA	NA	NA	NA	NA	0.110243	-0.0485585	NA	0.0841045	NA	NA	NA	NA
chr11	72821741	72822043	ATG16L2	1	0	NA	NA	NA	NA	NA	NA	NA	NA	NA	NA	NA	0.10793	NA	NA
chr11	72824122	72824733	ATG16L2	7	0	0.125358	0.179136	NA	NA	0.112595	0.105183	NA	0.021337	NA	NA	NA	0.148098	0.182632	0.282728
chr19	19656766	19656846	ATP13A1	0	1	NA	NA	NA	NA	NA	-0.0447128	0.021835	-0.109245	NA	0.0575249	NA	-0.0669022	NA	NA
chr14	92064414	92070934	ATXN3	0	1	NA	NA	NA	NA	NA	NA	NA	-0.1116	NA	NA	NA	NA	NA	NA
chr19	17808374	17811570	B3GNT3	0	1	-0.106743	0.0313953	NA	NA	NA	NA	NA	NA	-0.0268922	NA	NA	NA	NA	NA
chr17	82946983	82956694	B3GNTL1	0	1	NA	NA	NA	NA	NA	NA	-0.097295	-0.103259	NA	NA	NA	NA	NA	NA
chr12	552528	553193	B4GALNT3	1	0	NA	0.118306	NA	NA	NA	NA	NA	NA	NA	NA	NA	NA	NA	NA
chr12	552528	553190	B4GALNT3	1	0	NA	0.120991	0.0948979	NA	NA	NA	NA	NA	NA	NA	NA	NA	NA	NA
chr11	377327	379417	B4GALNT4	1	0	NA	NA	NA	NA	NA	0.152126	NA	NA	NA	NA	NA	NA	NA	NA
chr16	1344146	1344226	BAIAP3	1	0	NA	NA	NA	NA	NA	NA	NA	NA	NA	0.180454	NA	NA	NA	NA
chr4	121859178	121861503	BBS7	1	0	NA	NA	0.241071	NA	0.094559	NA	NA	0.0655447	NA	NA	NA	NA	0.0550908	NA
chr19	49670488	49673697	BCL2L12	0	1	NA	NA	NA	NA	NA	NA	-0.0447542	-0.0544957	-0.110817	NA	NA	NA	NA	NA
chr2	218660421	218660938	BCS1L	1	0	NA	NA	NA	NA	NA	0.046321	NA	NA	NA	0.121964	NA	NA	NA	NA
chr1	156242831	156243032	BGLAP	1	0	NA	NA	NA	NA	NA	NA	-0.0183156	NA	NA	NA	NA	NA	0.10723	NA
chr16	3029739	3030448	BICDL2	1	0	NA	0.183513	NA	NA	NA	NA	NA	-0.093423	NA	NA	NA	NA	NA	NA
chr15	59678087	59679591	BNIP2	1	0	NA	NA	0.139622	NA	0.0474659	0.0854345	0.0576145	0.0343723	NA	-0.0252057	NA	NA	NA	NA
chr15	59678834	59679591	BNIP2	1	0	NA	NA	NA	NA	NA	0.10721	0.077334	0.087308	NA	NA	NA	NA	NA	NA
chr8	144263401	144263477	BOP1	0	2	NA	NA	NA	NA	NA	-0.0351095	-0.113518	NA	NA	NA	NA	-0.105093	NA	NA
chr8	144264616	144264713	BOP1	0	1	NA	NA	0.0799495	NA	NA	NA	-0.102844	0.0413755	NA	NA	0.0298063	NA	NA	0.0509305
chrX	155071650	155072326	BRCC3	1	0	NA	NA	NA	NA	NA	NA	NA	NA	NA	0.122243	NA	NA	NA	NA
chrX	155072343	155073376	BRCC3	1	0	NA	NA	NA	NA	NA	NA	NA	NA	NA	0.105373	NA	NA	NA	NA
chr5	138166727	138167933	BRD8	1	0	NA	0.0605805	0.0313956	NA	NA	0.0265321	0.030022	NA	NA	0.0333117	NA	NA	0.106242	NA
chr1	44808906	44810212	BTBD19	0	1	NA	NA	NA	NA	NA	NA	0.034173	-0.124302	NA	NA	NA	NA	NA	NA
chr1	44810607	44812038	BTBD19	0	1	NA	NA	NA	NA	NA	NA	0.0702785	-0.122858	NA	NA	NA	NA	NA	NA
chr6	26390211	26390686	BTN2A2	0	1	NA	NA	NA	NA	NA	NA	NA	-0.100448	NA	NA	NA	NA	NA	NA
chr5	181050369	181053199	BTNL9	0	1	NA	NA	-0.03451	NA	NA	NA	0.0096	NA	NA	-0.131773	NA	NA	NA	NA
chr5	181054259	181055432	BTNL9	1	0	NA	NA	0.139725	NA	NA	NA	NA	-0.0815055	NA	NA	NA	NA	NA	NA
chr1	206053265	206060400	BX571818.1	0	1	NA	NA	NA	0.0627905	NA	NA	NA	NA	NA	0.05236	NA	NA	NA	-0.111526
chr11	66843069	66843168	C11orf80	0	1	NA	NA	NA	NA	NA	NA	-0.165302	NA	NA	NA	NA	NA	NA	NA
chr17	67993235	67993423	C17orf58	1	1	NA	NA	-0.113119	NA	NA	NA	NA	0.129404	NA	NA	NA	NA	NA	NA
chr1	1084383	1084480	C1orf159	0	1	NA	NA	NA	NA	NA	-0.022375	NA	-0.0636175	NA	NA	NA	NA	-0.112964	NA
chr1	1243152	1243443	C1QTNF12	1	0	NA	0.175139	NA	NA	NA	NA	NA	NA	NA	NA	NA	NA	NA	NA
chr1	1244275	1244380	C1QTNF12	1	0	NA	NA	NA	NA	NA	NA	NA	NA	NA	NA	NA	NA	0.507289	NA
chr20	3260028	3264437	C20orf194	1	0	NA	NA	NA	NA	NA	NA	NA	NA	NA	NA	NA	NA	0.118949	NA
chr20	276086	276792	C20orf96	4	0	0.107481	0.178296	0.095233	0.0144935	0.094761	NA	0.04864	NA	NA	0.035448	NA	0.0913075	0.204028	0.172192
chr20	276879	277043	C20orf96	1	0	NA	NA	NA	NA	NA	NA	0.0324345	NA	NA	NA	NA	0.0700562	NA	0.118027
chr8	145052497	145052585	C8orf33	0	3	NA	NA	NA	-0.129586	-0.0788355	NA	-0.0674205	-0.0573075	NA	NA	-0.103191	-0.181204	NA	NA
chr18	24160069	24161515	CABYR	1	0	NA	NA	NA	NA	NA	NA	NA	0.10945	NA	NA	NA	NA	NA	NA
chr12	53713900	53714132	CALCOCO1	1	0	0.0796371	0.129308	0.0759295	0.0416784	0.0700965	0.0229915	0.0341925	-0.0126055	NA	0.0310783	NA	0.029451	0.0941537	0.0636985
chr7	134934077	134935687	CALD1	1	0	NA	0.051313	NA	NA	NA	0.00289907	NA	NA	NA	0.0588323	NA	0.113531	0.0276742	NA
chr15	68199681	68205120	CALML4	1	0	NA	0.0191884	NA	NA	NA	NA	NA	NA	NA	NA	NA	0.133738	NA	NA
chr17	3869615	3869800	CAMKK1	1	0	NA	NA	NA	NA	NA	NA	NA	NA	NA	NA	NA	NA	0.17823	NA
chr20	33623296	33624763	CBFA2T2	1	0	NA	NA	NA	NA	NA	NA	0.0610075	NA	NA	NA	NA	NA	0.111396	NA
chr22	39138702	39141370	CBX7	1	0	NA	NA	NA	NA	0.0409418	0.0151192	NA	0.0414991	NA	0.0109495	NA	0.101239	0.0508615	NA
chr7	77256509	77258994	CCDC146	1	0	NA	NA	NA	NA	NA	NA	0.148492	NA	NA	NA	NA	NA	NA	NA
chr11	119195499	119195798	CCDC153	1	0	NA	NA	NA	NA	NA	NA	NA	0.124819	NA	NA	NA	NA	NA	NA
chr16	1434852	1435088	CCDC154	0	1	NA	NA	NA	NA	NA	NA	-0.158521	NA	NA	NA	NA	NA	NA	NA
chr14	57483151	57490988	CCDC198	2	0	NA	NA	0.122885	0.104763	NA	NA	NA	NA	NA	0.0696715	NA	NA	NA	NA
chr14	57483184	57490941	CCDC198	1	0	NA	NA	NA	NA	NA	NA	NA	NA	NA	0.126134	NA	NA	NA	NA
chr17	80049989	80050063	CCDC40	1	0	NA	NA	NA	NA	NA	NA	NA	NA	NA	0.154472	NA	NA	NA	NA
chr17	80058651	80058857	CCDC40	1	1	NA	NA	0.394301	-0.064746	NA	NA	NA	-0.127369	NA	NA	NA	NA	NA	NA
chr17	82193830	82193981	CCDC57	1	0	NA	NA	NA	NA	NA	NA	NA	NA	NA	NA	NA	NA	0.235171	NA
chr11	118999109	119010763	CCDC84	0	1	NA	NA	NA	NA	-0.0799285	NA	0.0114395	-0.0939415	NA	NA	NA	-0.159912	NA	NA
chr6	31144788	31144884	CCHCR1	2	0	0.10338	NA	NA	NA	0.105996	NA	NA	-0.0311076	NA	0.0618182	NA	NA	NA	0.0682915
chr8	94881745	94882131	CCNE2	0	1	NA	NA	NA	NA	NA	NA	NA	-0.250232	NA	NA	NA	NA	NA	NA
chr8	94882289	94882780	CCNE2	0	1	NA	NA	NA	NA	NA	NA	NA	-0.215124	NA	NA	NA	NA	NA	NA
chr3	157152241	157153035	CCNL1	1	0	NA	NA	0.113655	NA	NA	0.065488	0.038293	-0.083087	NA	NA	-0.038495	NA	NA	-0.067492
chr2	134942674	134946100	CCNT2	0	2	NA	NA	NA	NA	-0.100043	NA	NA	-0.048357	NA	NA	NA	-0.100572	NA	NA
chr11	66599253	66599458	CCS	1	0	0.0727255	0.0963855	NA	0.045046	NA	0.0264136	0.0322155	-0.046771	0.0448864	0.0467597	0.0276002	NA	0.071495	0.131072
chr15	42734047	42734225	CDAN1	1	0	NA	NA	NA	NA	NA	NA	0.129958	NA	NA	NA	NA	NA	NA	NA
chr20	3796731	3797621	CDC25B	0	1	NA	NA	NA	NA	NA	NA	NA	-0.104601	NA	NA	NA	-0.0421721	NA	NA
chr11	65083723	65083932	CDCA5	1	0	NA	0.0729157	NA	NA	NA	NA	NA	0.101096	0.0695709	NA	NA	NA	NA	NA
chr2	173363895	173364794	CDCA7	1	0	NA	NA	NA	NA	NA	NA	NA	NA	NA	NA	NA	0.129338	NA	NA
chr3	45089141	45091172	CDCP1	0	1	NA	NA	NA	NA	-0.150675	NA	NA	NA	NA	NA	NA	-0.0668254	NA	NA
chr16	89693467	89694172	CDK10	4	0	0.131622	0.180356	0.116573	0.0414917	NA	0.053376	0.075867	NA	0.0367694	0.0708144	0.0715326	0.0671615	0.144093	NA
chr16	89694232	89694664	CDK10	1	0	NA	0.086075	0.0795815	0.0353772	NA	NA	0.043849	-0.0485665	NA	0.0258124	0.046282	NA	0.10807	NA
chr1	1704655	1704903	CDK11A	1	0	0.068801	0.102181	NA	NA	NA	NA	NA	-0.002431	NA	0.0409968	NA	NA	0.0872155	0.047344
chr17	47975653	47975868	CDK5RAP3	4	0	0.168582	0.177399	0.069103	0.086293	0.082345	0.039529	0.021519	-0.084335	NA	0.114309	0.0790965	NA	0.065877	0.118778
chr1	50969899	50970357	CDKN2C	0	1	NA	NA	NA	NA	NA	NA	NA	-0.149451	NA	NA	NA	NA	NA	NA
chr11	47472102	47472190	CELF1	1	6	-0.281516	NA	0.196146	0.025296	-0.162833	NA	0.0709635	-0.225533	NA	0.0348815	NA	-0.303034	-0.262891	-0.229373
chr13	24884083	24884160	CENPJ	1	0	NA	NA	NA	NA	NA	NA	NA	0	NA	NA	NA	NA	NA	0.123673
chr16	67830088	67830389	CENPT	3	1	0.167224	0.267613	0.074337	NA	NA	NA	0.039283	-0.134759	NA	0.088035	NA	NA	0.21792	0.0915345
chr16	66961389	66963178	CES3	1	0	NA	NA	NA	NA	NA	NA	NA	NA	NA	0.185669	NA	NA	NA	NA
chr16	66963629	66963801	CES3	2	0	NA	0.156394	NA	NA	NA	NA	NA	NA	NA	0.318541	0.0642202	NA	NA	NA
chr16	66963935	66964356	CES3	2	0	NA	0.147027	NA	NA	NA	NA	NA	NA	NA	0.201745	NA	NA	NA	NA
chr16	66966345	66966724	CES3	2	0	NA	0.122366	NA	NA	NA	NA	NA	NA	NA	0.23933	0.0542928	NA	NA	NA
chr2	201118901	201119027	CFLAR	1	0	NA	NA	NA	NA	0.039408	NA	NA	NA	NA	NA	NA	0.183914	NA	NA
chr15	92900824	92901166	CHD2	0	1	NA	-0.0538525	NA	NA	NA	NA	0.0655365	NA	NA	NA	NA	-0.070224	NA	-0.116684
chr17	7909338	7910427	CHD3	1	0	0.184419	0.092883	NA	0.0304924	0.08239	NA	0.028968	NA	0.0253511	0.0748728	NA	0.0820395	0.0821409	0.094034
chr17	7909384	7910427	CHD3	1	0	0.180239	0.0945405	NA	0.0270831	0.087825	0.027023	0.039224	NA	0.0365424	0.0598079	NA	0.0839915	0.0821409	0.065971
chr22	50580271	50580357	CHKB	1	0	NA	0.123825	NA	0.0580275	NA	NA	NA	-0.034221	0.038554	0.0541886	NA	NA	NA	NA
chr22	50581553	50581748	CHKB	3	0	0.060977	0.16049	0.0612228	0.0444715	0.0310725	0.05149	NA	NA	0.0544794	0.0661655	NA	0.050839	0.105443	0.143642
chr22	50581862	50582248	CHKB	3	1	NA	NA	0.059185	0.152831	NA	0.0816035	NA	-0.139659	NA	0.123449	NA	NA	NA	0.135775
chr22	50582357	50582557	CHKB	3	0	NA	0.143653	NA	0.100453	0.044674	NA	NA	NA	NA	0.0603505	NA	NA	0.121419	NA
chr3	184382774	184382855	CHRD	0	1	NA	NA	NA	NA	NA	NA	NA	-0.042399	NA	NA	0.0546805	-0.191331	NA	NA
chr16	791370	791850	CHTF18	0	1	NA	NA	NA	NA	NA	NA	NA	-0.0788855	NA	NA	NA	-0.141254	NA	NA
chr16	791948	792223	CHTF18	0	2	NA	NA	NA	NA	NA	NA	NA	-0.122788	NA	NA	NA	-0.129546	NA	NA
chr19	45064630	45067336	CLASRP	0	1	NA	NA	NA	-0.111542	NA	NA	NA	NA	NA	NA	NA	NA	NA	NA
chr11	67367626	67373523	CLCF1	0	1	NA	NA	NA	-0.0426275	NA	NA	-0.0269945	NA	NA	NA	NA	-0.161859	NA	NA
chr7	101232914	101234277	CLDN15	3	0	NA	NA	0.220747	0.207663	0.128809	NA	NA	NA	NA	0.0962434	NA	NA	NA	NA
chr2	200859746	200860124	CLK1	3	0	NA	NA	0.186527	0.128762	NA	0.057471	NA	-0.043305	NA	0.0561035	0.07212	NA	0.115082	NA
chr2	200860215	200861237	CLK1	2	0	NA	NA	0.149901	0.127421	NA	NA	NA	-0.041336	NA	0.093502	NA	NA	0.069941	NA
chr4	10525922	10528075	CLNK	1	0	NA	NA	0.111651	NA	NA	NA	NA	NA	NA	NA	NA	NA	NA	NA
chr2	96826982	96827730	CNNM3	0	1	NA	NA	NA	NA	NA	NA	NA	NA	-0.123599	NA	NA	0.0133118	NA	NA
chr2	96828195	96828566	CNNM3	0	1	0.0247786	NA	NA	NA	NA	-0.017533	NA	NA	-0.114049	NA	NA	NA	NA	NA
chr2	227290886	227293190	COL4A3	3	0	NA	NA	0.268456	0.109723	NA	NA	0.062524	NA	NA	0.139171	NA	NA	NA	NA
chr2	227294570	227294963	COL4A3	3	0	NA	NA	0.190388	0.130024	NA	NA	NA	NA	NA	0.20358	NA	NA	NA	NA
chr2	227304144	227304984	COL4A3	2	0	NA	NA	0.134408	0.108106	NA	NA	NA	NA	NA	NA	NA	NA	NA	NA
chr2	227007588	227008017	COL4A4	1	0	NA	NA	0.138925	NA	NA	NA	NA	NA	NA	NA	NA	NA	NA	NA
chr2	227008304	227010312	COL4A4	1	0	NA	NA	0.229475	NA	NA	NA	NA	NA	NA	NA	NA	NA	NA	NA
chr3	48570178	48570274	COL7A1	0	1	NA	NA	NA	NA	NA	NA	NA	-0.16587	NA	NA	NA	NA	NA	NA
chr3	48592467	48592569	COL7A1	0	1	NA	NA	NA	NA	NA	NA	NA	-0.222301	0.0435767	NA	NA	NA	NA	NA
chr11	111300017	111300526	COLCA2	1	0	NA	NA	0.131956	NA	NA	NA	NA	NA	NA	NA	NA	NA	NA	NA
chr19	40705181	40705324	COQ8B	1	1	-0.112281	0.062618	0.153131	0.082577	NA	-0.041104	NA	-0.042966	NA	0.0785425	NA	-0.0682315	NA	NA
chr19	16894437	16896175	CPAMD8	1	0	NA	NA	NA	NA	NA	0.018905	-0.0205414	NA	NA	0.370182	NA	NA	NA	NA
chr22	50576637	50576856	CPT1B	3	0	0.168692	NA	-0.0534524	0.101292	NA	NA	NA	NA	NA	0.152556	0.080659	NA	0.028854	NA
chr22	50577034	50577323	CPT1B	1	0	NA	NA	NA	NA	NA	NA	NA	NA	NA	0.151755	NA	NA	NA	NA
chr11	828963	829359	CRACR2B	1	0	NA	0.0762001	0.105686	NA	NA	NA	NA	NA	NA	NA	NA	NA	NA	NA
chr11	830337	830620	CRACR2B	4	1	NA	0.192089	-0.123444	NA	0.104787	NA	NA	NA	NA	0.221081	NA	0.152763	NA	NA
chr12	53171441	53171881	CSAD	1	0	NA	NA	NA	NA	NA	NA	NA	0.049158	NA	0.146577	NA	NA	NA	NA
chr1	36475673	36479432	CSF3R	0	1	NA	NA	NA	NA	NA	NA	NA	-0.104357	NA	NA	NA	NA	NA	NA
chr17	8232475	8232905	CTC1	1	0	NA	NA	NA	NA	NA	NA	NA	-0.035022	NA	NA	NA	NA	0.144672	NA
chr17	57866544	57867356	CUEDC1	1	0	NA	0.0877102	0.0158414	NA	NA	NA	0.0200599	NA	NA	0.0247108	NA	NA	0.102877	NA
chr6	43038692	43038841	CUL7	2	0	NA	NA	0.0544702	NA	NA	NA	-0.0380303	NA	NA	NA	0.121691	NA	NA	0.102597
chr6	43205115	43205262	CUL9	1	0	NA	0.186575	NA	NA	NA	NA	NA	NA	NA	NA	NA	NA	NA	NA
chr9	120843439	120844992	CUTALP	1	0	NA	0.11735	NA	NA	0.080235	NA	NA	NA	NA	NA	NA	0.078003	NA	NA
chr4	74097771	74098600	CXCL2	1	0	NA	NA	NA	0.154791	0.0995386	NA	0.0936837	0.0651345	NA	NA	0.0518006	0.0421733	NA	NA
chr4	74098684	74098798	CXCL2	2	0	NA	NA	NA	NA	0.118491	NA	0.0941405	NA	NA	NA	0.0729126	NA	0.103587	NA
chr8	144450770	144452358	CYHR1	2	0	0.123322	NA	NA	0.027676	NA	NA	0.013884	0.024065	0.043612	0.015052	0.0453625	NA	0.154417	NA
chr20	54154761	54157168	CYP24A1	0	1	-0.194765	NA	NA	NA	NA	NA	NA	NA	-0.052997	NA	NA	NA	NA	NA
chr20	54154933	54157168	CYP24A1	0	1	-0.194765	NA	NA	NA	NA	NA	NA	NA	-0.041671	NA	NA	NA	NA	NA
chr7	985323	986623	CYP2W1	1	0	NA	0.15352	NA	NA	NA	NA	NA	NA	NA	NA	NA	NA	NA	NA
chr19	15680519	15682388	CYP4F12	1	0	NA	0.126184	NA	NA	NA	NA	NA	NA	NA	NA	0.0275191	NA	NA	NA
chr4	186192037	186194499	CYP4V2	2	0	NA	0.103258	0.177972	NA	NA	NA	0.050449	-0.096034	NA	-0.040058	NA	NA	NA	NA
chr4	186194612	186196002	CYP4V2	0	1	NA	NA	NA	NA	NA	NA	0.0164435	-0.104522	NA	0.0196285	NA	NA	NA	NA
chr7	135166871	135167731	CYREN	3	4	NA	-0.077577	0.203606	0.152989	-0.261888	NA	0.015306	-0.145923	NA	0.28528	-0.118193	-0.293111	NA	-0.0902584
chr3	49017869	49018022	DALRD3	1	0	NA	0.036896	0.117747	NA	NA	NA	NA	0.0548191	NA	NA	NA	0.068012	NA	NA
chr3	49018318	49018399	DALRD3	1	0	NA	NA	0.111041	NA	NA	NA	NA	NA	NA	NA	NA	NA	0.052772	NA
chr2	171478070	171480037	DCAF17	1	0	NA	NA	NA	NA	NA	NA	0.118648	NA	NA	NA	NA	NA	NA	NA
chr1	160216908	160222655	DCAF8	1	0	NA	NA	NA	NA	NA	NA	NA	NA	NA	0.109341	NA	NA	NA	NA
chr1	160218968	160222650	DCAF8	1	0	0.0537959	0.0586113	0.0366965	0.0202315	NA	0.0397887	NA	-0.038955	NA	0.0330358	0.01426	0.0088625	0.12234	NA
chr11	47215263	47216335	DDB2	1	0	NA	NA	NA	NA	NA	NA	NA	-0.0155694	NA	NA	NA	NA	0.119006	NA
chr11	47234672	47234756	DDB2	0	2	NA	NA	NA	-0.173454	NA	0.0217354	-0.0725514	NA	NA	-0.133625	NA	NA	0.0455043	NA
chr11	47234934	47235269	DDB2	0	3	0.0308424	NA	NA	-0.239366	NA	0.0658597	-0.124795	NA	NA	-0.200313	0.0664527	-0.024289	NA	0.0513285
chr11	47235412	47237836	DDB2	0	2	0.0337353	NA	NA	-0.123363	NA	0.0486515	-0.0872089	-0.007267	NA	-0.177828	0.0301848	NA	NA	NA
chr22	38488115	38492055	DDX17	2	1	0.10002	-0.080675	0.10419	NA	NA	NA	0.07528	-0.090825	NA	0.0707955	0.0618158	-0.06307	NA	-0.149805
chr14	94051259	94056015	DDX24	1	0	NA	NA	NA	NA	NA	NA	NA	0.045079	NA	NA	NA	0.113496	NA	NA
chr19	14409447	14409535	DDX39A	0	3	-0.0900684	NA	0.027016	NA	-0.107284	-0.062596	NA	-0.106635	NA	NA	-0.060224	-0.100867	-0.0180866	-0.0928538
chr6	31532911	31534485	DDX39B	0	1	NA	NA	0.067006	NA	NA	NA	NA	-0.0262385	NA	0.0394521	NA	-0.117964	NA	NA
chr6	31532911	31535366	DDX39B	0	1	NA	NA	0.05998	NA	-0.02981	NA	NA	-0.034456	NA	0.0245575	0.0174991	-0.115716	NA	NA
chr12	132141020	132141274	DDX51	1	0	NA	NA	NA	NA	NA	NA	0.0418595	NA	NA	0.0927213	NA	NA	NA	0.135068
chr19	6471305	6471405	DENND1C	1	0	NA	NA	NA	NA	NA	NA	NA	NA	NA	0.187144	NA	NA	NA	NA
chr1	153933871	153934134	DENND4B	1	0	NA	NA	NA	NA	NA	NA	NA	-0.01662	NA	0.117689	NA	NA	NA	NA
chr1	153941048	153941230	DENND4B	1	0	NA	NA	NA	NA	NA	NA	NA	NA	NA	0.13905	NA	NA	NA	NA
chr8	144317109	144317186	DGAT1	1	0	0.0591284	0.113355	NA	NA	NA	NA	NA	NA	0.0324651	0.0384469	0.015733	NA	NA	NA
chr11	46377212	46378197	DGKZ	2	3	-0.129584	-0.11111	0.100061	NA	-0.032331	NA	-0.059079	-0.092623	0.128655	NA	NA	-0.0989845	-0.166883	NA
chr14	91215556	91224683	DGLUCY	1	0	NA	0.0617531	NA	NA	0.0261742	0.0134815	NA	NA	NA	0.0162533	NA	NA	0.106652	NA
chr21	46560783	46561747	DIP2A	1	0	NA	0.124984	NA	NA	NA	NA	NA	-0.0500785	NA	NA	NA	NA	NA	NA
chr9	136717711	136721920	DIPK1B	1	0	NA	NA	NA	0.0666323	NA	NA	NA	0.0661665	NA	0.0950918	NA	0.0364536	0.241325	NA
chr7	87194102	87194683	DMTF1	0	2	NA	NA	0.05396	NA	-0.127292	NA	0.027047	NA	NA	NA	NA	-0.131592	NA	NA
chr7	87194102	87195030	DMTF1	0	2	NA	NA	NA	NA	-0.126488	NA	0.032186	NA	NA	NA	NA	-0.113122	NA	NA
chr15	51458795	51459597	DMXL2	1	0	NA	NA	0.0307685	NA	NA	0.0401205	0.108746	NA	NA	0.0283645	NA	0.007787	NA	NA
chr19	55160775	55161064	DNAAF3	1	0	NA	NA	NA	0.129213	NA	NA	NA	NA	NA	NA	NA	NA	NA	NA
chr3	52399201	52399544	DNAH1	1	0	NA	NA	NA	NA	NA	NA	NA	NA	NA	0.147142	NA	NA	NA	NA
chr12	32737942	32738263	DNM1L	0	1	NA	NA	NA	NA	-0.0649495	NA	NA	-0.065929	NA	0.027026	NA	-0.0424636	0.07352	-0.164951
chr19	10139817	10140045	DNMT1	0	1	-0.0284912	NA	NA	NA	-0.0917629	NA	NA	-0.0418112	NA	0.0397766	NA	-0.129784	NA	NA
chr19	10141189	10142027	DNMT1	0	2	-0.0223515	-0.0096858	NA	NA	-0.155258	0.06043	NA	-0.0546756	NA	NA	NA	-0.206068	NA	NA
chr19	10149968	10151397	DNMT1	0	1	NA	NA	NA	NA	-0.101209	NA	NA	NA	NA	NA	NA	-0.0826649	NA	NA
chr2	25247749	25248036	DNMT3A	0	1	NA	NA	NA	NA	NA	NA	NA	-0.092576	NA	NA	NA	-0.163546	NA	NA
chr21	33586181	33587521	DONSON	0	1	NA	NA	NA	NA	NA	NA	NA	-0.100879	NA	NA	NA	NA	NA	NA
chr21	36238701	36239764	DOP1B	1	0	NA	NA	NA	NA	NA	NA	NA	NA	NA	0.334489	NA	NA	NA	NA
chr9	137114576	137114646	DPP7	2	0	0.097055	0.198802	0.137721	0.0733525	0.038336	NA	0.050455	NA	NA	0.043766	0.0572795	0.057328	NA	NA
chr2	74523218	74523309	DQX1	1	0	NA	0.207134	NA	NA	NA	NA	NA	NA	NA	NA	NA	NA	NA	NA
chr17	18004494	18006182	DRC3	0	1	NA	NA	NA	NA	NA	NA	NA	-0.135728	NA	-0.079915	NA	NA	NA	NA
chr17	18006253	18007023	DRC3	0	1	NA	NA	NA	NA	NA	NA	NA	-0.111876	NA	-0.066603	NA	NA	NA	NA
chr17	18101590	18101920	DRG2	0	1	NA	NA	NA	NA	NA	NA	NA	NA	NA	NA	-0.171303	NA	NA	NA
chr2	96144882	96144966	DUSP2	0	1	NA	NA	NA	NA	NA	NA	-0.120672	NA	NA	NA	NA	NA	NA	NA
chr6	31970203	31970342	DXO	1	0	NA	0.123996	NA	NA	NA	-0.042758	NA	-0.082716	NA	0.0323925	NA	NA	NA	NA
chr1	52905090	52906518	ECHDC2	1	1	0.042578	0.100319	0.07014	0.0298057	NA	0.054514	0.023876	-0.113664	0.0674582	0.0752297	0.037648	0.053746	NA	NA
chr1	52911790	52921552	ECHDC2	0	1	NA	NA	0.0566	NA	NA	0.0253999	NA	-0.145409	NA	0.0428997	0.0231605	NA	NA	NA
chr1	52912021	52912753	ECHDC2	1	1	NA	NA	NA	NA	NA	0.154578	NA	-0.168793	NA	NA	0.0626185	NA	NA	NA
chr20	35146935	35147151	EDEM2	0	2	NA	0.0594714	NA	-0.0667599	0.0254704	NA	NA	0.0102045	-0.0591866	-0.05107	-0.10691	0.0239458	-0.111488	NA
chr2	206159684	206159958	EEF1B2	0	2	-0.0744595	NA	NA	-0.082933	-0.125605	-0.062478	-0.037366	-0.133677	NA	-0.045278	NA	-0.057174	NA	NA
chr2	206159684	206159912	EEF1B2	0	2	-0.07211	NA	NA	-0.0844505	-0.107186	-0.0615445	-0.0349805	-0.139359	NA	-0.0441235	NA	-0.055077	NA	NA
chr17	47324523	47326225	EFCAB13	1	0	NA	NA	NA	NA	NA	NA	0.166661	NA	NA	NA	NA	NA	NA	NA
chr6	32167429	32167502	EGFL8	2	0	NA	NA	0.149783	NA	NA	NA	NA	NA	NA	0.137893	NA	0.074981	NA	NA
chr16	67203004	67203118	ELMO3	1	0	NA	0.103539	NA	0.0416961	NA	NA	NA	-0.0540223	NA	0.0274341	NA	NA	NA	NA
chr4	110197974	110198246	ELOVL6	1	0	NA	0.0608047	0.139212	NA	NA	NA	NA	NA	NA	NA	NA	NA	NA	NA
chr2	27085297	27085677	EMILIN1	2	0	0.0252491	NA	0.155975	0.144731	-0.0236238	NA	NA	-0.0227568	NA	0.089744	0.0880342	NA	NA	NA
chr11	62602889	62603148	EML3	0	1	NA	0.0612036	NA	NA	NA	NA	-0.030736	-0.0632461	-0.115268	NA	NA	0.0266005	NA	0.0393274
chr12	6916729	6917037	ENO2	1	0	NA	NA	NA	NA	NA	NA	NA	NA	0.0439658	0.0285852	NA	NA	0.116656	NA
chr9	137050538	137050901	ENTPD2	1	0	NA	0.106283	NA	NA	NA	NA	NA	NA	NA	NA	NA	NA	NA	NA
chr5	112165118	112168738	EPB41L4A	1	0	NA	NA	0.126188	-0.0224754	NA	NA	0.0149675	NA	NA	NA	NA	-0.0268845	NA	NA
chr7	143398448	143398600	EPHA1	0	1	NA	NA	NA	NA	NA	NA	NA	-0.137358	NA	NA	NA	NA	NA	NA
chr1	37718816	37719413	EPHA10	1	0	NA	0.10131	NA	NA	NA	NA	NA	NA	NA	NA	NA	NA	NA	NA
chr19	11380971	11381055	EPOR	3	0	NA	NA	NA	0.086008	NA	NA	-0.0301551	NA	NA	0.136119	0.28361	0.185179	NA	NA
chr19	11383232	11384092	EPOR	1	0	NA	NA	0.208744	NA	NA	NA	NA	NA	NA	NA	NA	NA	NA	NA
chr16	13935743	13937765	ERCC4	3	0	NA	NA	NA	0.169322	NA	-0.0969895	0.168897	0.137938	NA	NA	NA	NA	NA	NA
chr2	238162838	238163736	ERFE	0	1	NA	NA	NA	NA	NA	NA	-0.232417	NA	NA	NA	NA	NA	NA	NA
chr17	64044927	64045358	ERN1	0	1	NA	NA	NA	NA	NA	NA	NA	NA	NA	NA	NA	-0.120037	NA	NA
chr16	68235762	68235847	ESRP2	0	3	NA	-0.199338	NA	NA	NA	NA	NA	NA	NA	-0.144165	-0.204824	NA	NA	NA
chr16	67184604	67184685	EXOC3L1	0	1	NA	NA	NA	NA	NA	NA	NA	NA	NA	-0.10527	NA	NA	NA	NA
chr17	42702961	42703739	EZH1	3	0	0.204419	0.218058	NA	NA	0.0800345	0.0773917	0.048388	NA	NA	0.0512708	NA	0.0726445	0.225593	NA
chr17	42718067	42718453	EZH1	1	0	NA	NA	NA	NA	NA	NA	0.0191291	0.0609126	0.11668	0.021044	NA	0.0841271	0.0905494	NA
chr5	177402459	177402549	F12	0	1	NA	NA	NA	-0.521479	NA	NA	NA	0.0728381	NA	NA	NA	NA	NA	NA
chr1	46410497	46410813	FAAH	1	0	NA	0.0759765	NA	NA	NA	NA	NA	-0.073785	NA	0.0378642	NA	0.118275	NA	NA
chr2	95412542	95412676	FAHD2A	2	0	NA	0.04373	-0.0332098	NA	NA	NA	NA	-0.0290225	NA	0.0453816	0.050507	NA	0.111452	0.247601
chr2	95412764	95412894	FAHD2A	1	0	NA	NA	NA	NA	NA	NA	NA	-0.0171918	NA	0.0191486	0.0323558	NA	0.07589	0.126267
chr11	59143304	59143496	FAM111A	1	0	NA	NA	0.090864	0.013891	NA	0.0455175	0.126615	-0.033489	NA	0.040432	NA	NA	NA	NA
chr8	22096509	22097515	FAM160B2	1	0	0.10197	NA	NA	NA	NA	NA	0.0113224	NA	NA	NA	NA	NA	0.0721285	NA
chr1	32247682	32248370	FAM167B	2	0	NA	NA	0.0403864	0.139128	NA	NA	-0.0936195	NA	NA	NA	NA	0.164693	NA	NA
chr8	143730597	143733690	FAM83H	1	2	NA	0.0437731	0.149143	NA	-0.091144	0.053285	-0.138443	NA	NA	NA	NA	-0.147676	NA	NA
chr8	123810351	123812518	FAM91A1	0	2	NA	-0.015765	NA	NA	-0.137702	NA	0.0119121	-0.0851511	-0.0127732	0.0425456	NA	-0.126302	-0.0426428	NA
chr16	89770259	89770563	FANCA	1	0	NA	0.127159	NA	NA	NA	NA	NA	NA	NA	NA	NA	NA	NA	NA
chr2	58161638	58162865	FANCL	1	4	-0.122486	-0.0573805	0.108522	-0.091506	-0.131204	NA	-0.091806	-0.036058	-0.129241	-0.0514525	0.0428925	-0.210572	NA	-0.0155205
chr2	58162947	58163028	FANCL	1	3	-0.153559	NA	0.131023	NA	-0.179426	NA	-0.092075	-0.052347	-0.062776	NA	NA	-0.173431	NA	NA
chr2	58163074	58163433	FANCL	1	2	-0.0958325	-0.0414105	0.186456	NA	-0.181623	NA	-0.0530685	-0.046779	-0.085232	NA	0.0472795	-0.220768	NA	NA
chr2	58163517	58165723	FANCL	0	1	NA	NA	NA	NA	-0.0939263	-0.0210506	-0.0291798	-0.0364964	NA	NA	NA	-0.123246	NA	NA
chr5	7862997	7865897	FASTKD3	2	1	NA	NA	NA	0.106776	NA	0.035758	NA	NA	NA	0.232741	NA	-0.107717	NA	NA
chr10	102421507	102421786	FBXL15	2	2	NA	NA	0.097949	-0.13582	NA	NA	NA	NA	NA	-0.152961	-0.052693	NA	0.150406	0.10558
chr8	144356915	144356989	FBXL6	1	1	NA	0.135531	NA	NA	NA	NA	-0.113907	-0.078611	NA	NA	NA	NA	NA	NA
chr8	144357786	144358031	FBXL6	1	0	NA	0.130636	NA	NA	NA	NA	NA	NA	NA	NA	NA	NA	NA	NA
chr1	11658393	11658532	FBXO44	1	0	NA	NA	0.0361689	NA	NA	0.02588	0.0411815	NA	NA	NA	NA	NA	NA	0.144927
chr19	39893527	39893921	FCGBP	0	1	NA	NA	NA	-0.668652	NA	NA	NA	NA	NA	NA	NA	NA	NA	NA
chr5	141644438	141644572	FCHSD1	0	1	NA	NA	NA	NA	-0.0758413	NA	NA	-0.129894	NA	NA	NA	NA	NA	NA
chr5	141644690	141644858	FCHSD1	1	0	NA	NA	NA	NA	NA	NA	NA	-0.0450858	NA	0.104858	NA	NA	NA	NA
chr16	70466954	70467373	FCSK	1	0	NA	0.12492	NA	NA	NA	NA	NA	NA	NA	NA	NA	NA	NA	NA
chr17	45245416	45245631	FMNL1	1	0	NA	NA	NA	NA	NA	0.20357	-0.0659985	-0.0241388	NA	NA	NA	0.0223408	NA	NA
chr17	45245733	45245877	FMNL1	1	0	NA	NA	NA	NA	NA	0.100419	-0.0515246	NA	NA	NA	NA	NA	NA	NA
chr9	129890546	129895837	FNBP1	3	0	0.213077	NA	0.118035	NA	0.0182875	0.058814	NA	0.03556	NA	-0.029402	NA	0.014474	0.10691	NA
chr11	47724778	47731373	FNBP4	1	0	NA	NA	0.105142	NA	NA	0.0323584	NA	-0.027994	NA	0.0335451	NA	-0.020259	0.0477965	NA
chr11	47725836	47731373	FNBP4	1	0	NA	NA	0.112214	NA	NA	0.0406089	NA	-0.032544	NA	0.0512333	NA	-0.031857	0.0512985	NA
chr10	73773041	73773189	FUT11	1	0	NA	NA	NA	NA	NA	NA	NA	NA	NA	0.277741	NA	NA	NA	NA
chr19	5846966	5848739	FUT3	1	0	NA	NA	NA	NA	NA	NA	NA	NA	NA	NA	NA	NA	0.159107	NA
chr3	180962940	180963027	FXR1	0	2	-0.097597	-0.0907125	NA	-0.041271	-0.129029	-0.022986	-0.043471	-0.015015	-0.074279	-0.047356	NA	-0.182207	-0.034138	NA
chr6	29630643	29631395	GABBR1	2	0	NA	NA	NA	NA	NA	0.107285	0.0837275	NA	NA	NA	NA	NA	0.168483	NA
chrX	151955860	151956036	GABRE	1	0	NA	NA	NA	NA	NA	NA	NA	0.254226	NA	NA	NA	NA	NA	NA
chr7	92448877	92450700	GATAD1	0	1	NA	NA	NA	NA	NA	0.029543	0.0719651	-0.080042	NA	0.0215106	NA	-0.088546	NA	-0.142706
chr11	770903	770992	GATD1	0	1	NA	0.080542	-0.062006	-0.052949	NA	0.043972	-0.112044	NA	NA	NA	0.0797335	0.097771	NA	NA
chr9	35737939	35738036	GBA2	0	2	NA	0.0183816	-0.0441964	0.066972	NA	-0.116514	NA	-0.03958	0.0673645	0.0947645	NA	-0.053385	-0.099577	-0.117276
chr16	30112568	30112657	GDPD3	0	1	NA	NA	NA	NA	NA	NA	NA	NA	NA	-0.180711	NA	NA	NA	NA
chr16	30112793	30113021	GDPD3	1	1	NA	0.195771	NA	NA	NA	NA	NA	-0.141701	NA	NA	NA	NA	NA	NA
chr16	30113064	30113339	GDPD3	1	1	NA	0.118512	NA	NA	NA	NA	NA	-0.222999	NA	NA	NA	NA	NA	NA
chr16	1984476	1984746	GFER	0	1	NA	NA	-0.113121	-0.03219	NA	-0.064031	NA	NA	NA	-0.046776	NA	NA	NA	NA
chr17	75241696	75242335	GGA3	1	0	NA	NA	NA	NA	NA	NA	0.01268	NA	NA	NA	NA	NA	0.112674	NA
chr7	100682777	100683011	GIGYF1	1	0	NA	0.0882195	0.050527	NA	NA	NA	NA	-0.023717	NA	0.038572	NA	-0.022888	0.072409	0.106447
chr3	52291111	52291746	GLYCTK	2	0	NA	0.125433	0.020483	0.123432	NA	NA	NA	NA	NA	0.0766131	0.0632577	NA	NA	NA
chr14	76195972	76201690	GPATCH2L	0	2	NA	NA	NA	-0.114661	NA	NA	NA	0.0213065	NA	-0.10195	NA	-0.076922	NA	NA
chr20	5584322	5586193	GPCPD1	1	0	NA	NA	NA	NA	NA	NA	0.0313059	NA	NA	NA	NA	NA	0.106605	NA
chr1	6250003	6250439	GPR153	3	0	NA	0.10455	NA	NA	0.0751465	NA	NA	0.100323	0.0863035	NA	NA	0.162315	0.0813235	NA
chr1	6251530	6253717	GPR153	1	0	NA	NA	NA	NA	0.100226	NA	NA	NA	-0.068338	NA	NA	0.060543	NA	NA
chr8	144505927	144505994	GPT	2	0	NA	0.240881	NA	0.102483	NA	NA	NA	NA	NA	0.0754369	0.0463553	NA	NA	NA
chr8	144506131	144506231	GPT	3	0	NA	0.258825	0.213045	0.177602	NA	NA	NA	NA	NA	0.0818331	0.0475274	NA	0.090469	NA
chr8	144506843	144506909	GPT	1	0	NA	0.125289	NA	NA	NA	NA	NA	NA	NA	NA	0.0200245	NA	NA	NA
chr17	39742716	39742897	GRB7	1	0	NA	NA	NA	NA	NA	NA	NA	-0.074333	NA	0.121628	NA	-0.0539525	NA	NA
chr7	77329391	77330238	GSAP	2	0	0.109382	NA	0.145163	NA	NA	0.080485	NA	NA	NA	NA	NA	0.071151	0.074703	NA
chr17	39906271	39906960	GSDMB	0	2	NA	0.0649327	NA	NA	-0.225115	NA	0.083896	-0.104	NA	NA	-0.087861	-0.024246	NA	NA
chr17	39906987	39908175	GSDMB	0	1	NA	0.0745937	NA	NA	NA	NA	NA	-0.110027	NA	NA	NA	NA	NA	NA
chr8	129750570	129751541	GSDMC	1	0	NA	NA	NA	NA	NA	NA	NA	NA	NA	NA	NA	0.116687	NA	NA
chr8	129751568	129751861	GSDMC	1	0	NA	NA	NA	NA	NA	NA	NA	NA	NA	NA	NA	0.13113	NA	NA
chr1	109669571	109671286	GSTM2	2	0	0.115532	0.095732	NA	0.0869512	NA	0.0519735	0.037145	-0.0391187	NA	0.029298	NA	NA	0.107459	NA
chr14	24632118	24632323	GZMB	1	0	NA	0.416107	NA	NA	NA	NA	NA	NA	NA	NA	NA	NA	NA	NA
chr16	69113542	69114342	HAS3	0	1	NA	NA	NA	NA	NA	NA	NA	-0.158467	NA	NA	NA	-0.0529841	NA	NA
chr22	50248890	50249102	HDAC10	1	0	NA	0.174871	NA	NA	NA	0.0445025	NA	-0.042642	NA	NA	NA	NA	NA	NA
chr12	112167917	112169502	HECTD4	1	0	NA	NA	NA	NA	NA	NA	0.0317375	0.03848	NA	NA	NA	NA	0.109475	NA
chr1	999613	999691	HES4	3	1	0.144881	0.169811	NA	NA	NA	NA	0.10681	-0.171093	NA	-0.0445345	NA	NA	NA	NA
chr17	82436738	82437167	HEXD	1	0	0.178607	NA	0.0979349	0.026182	0.082622	0.042059	0.055768	NA	NA	NA	NA	NA	NA	NA
chr17	82441889	82442176	HEXD	0	1	NA	NA	NA	0.0332274	NA	NA	NA	NA	0.0238413	NA	NA	NA	-0.14382	NA
chr6	26091104	26091313	HFE	1	0	NA	NA	NA	NA	NA	0.128653	NA	NA	NA	NA	0.034908	NA	NA	NA
chr12	122857215	122858101	HIP1R	1	0	NA	0.113945	NA	0.0120892	NA	NA	NA	-0.0269365	NA	0.0685566	NA	NA	NA	NA
chr6	32813251	32813439	HLA-DOB	0	1	NA	NA	NA	NA	NA	NA	NA	-0.101251	NA	NA	NA	NA	NA	NA
chr15	77479321	77482969	HMG20A	0	2	NA	NA	0.0342954	NA	-0.138001	NA	NA	-0.0618353	NA	0.0401629	NA	-0.156612	NA	NA
chr13	30461688	30462537	HMGB1	0	1	NA	NA	NA	NA	NA	NA	NA	-0.153727	NA	NA	NA	NA	NA	NA
chr6	79202155	79202275	HMGN3	1	1	NA	NA	0.110679	NA	NA	NA	0.038567	-0.144735	NA	0.037858	NA	NA	NA	NA
chr12	54282596	54283826	HNRNPA1	0	1	NA	NA	NA	NA	NA	NA	-0.184257	-0.0959505	NA	NA	NA	NA	NA	NA
chr5	179618323	179619268	HNRNPH1	0	1	NA	NA	0.0931188	NA	NA	0.048131	0.0392735	-0.080551	NA	0.0412426	NA	-0.10691	0.0605865	NA
chr5	179621035	179621241	HNRNPH1	0	1	NA	NA	0.0632551	NA	NA	0.0423251	0.051186	-0.066021	NA	0.0377999	NA	-0.120224	0.0481444	NA
chr16	67166070	67166319	HSF4	2	0	NA	NA	0.181894	NA	NA	0.05478	0.031895	NA	NA	NA	NA	NA	0.100863	NA
chr20	3750907	3751510	HSPA12B	1	0	NA	NA	NA	NA	NA	NA	NA	NA	NA	NA	NA	0.17719	NA	NA
chr4	987242	987808	IDUA	0	3	NA	NA	NA	-0.31492	NA	NA	NA	NA	NA	-0.202507	-0.134217	NA	NA	NA
chr12	6548157	6548424	IFFO1	1	0	NA	NA	NA	0.10593	NA	NA	NA	-0.070918	NA	NA	NA	NA	NA	NA
chr1	24157891	24159051	IFNLR1	0	1	NA	NA	NA	NA	NA	NA	NA	-0.426635	NA	NA	NA	NA	NA	NA
chr1	24159182	24159473	IFNLR1	1	1	NA	NA	NA	NA	NA	NA	NA	-0.337568	NA	NA	NA	0.454956	NA	NA
chr2	27445988	27446259	IFT172	3	1	NA	-0.0327725	NA	NA	0.290957	-0.079318	NA	NA	-0.142637	-0.0784774	NA	0.164827	0.521814	NA
chr2	27454418	27454566	IFT172	0	1	NA	NA	NA	NA	NA	NA	NA	-0.119651	NA	NA	NA	NA	NA	NA
chr3	160383504	160384405	IFT80	1	0	NA	NA	NA	NA	NA	NA	NA	NA	NA	0.199284	NA	NA	NA	NA
chr3	9932858	9932952	IL17RC	0	1	0.0722122	0.049796	NA	NA	NA	0.0216625	-0.153298	NA	0.0631989	-0.031692	0.0541678	NA	NA	0.088228
chr2	102235277	102239191	IL1RL2	1	0	NA	NA	0.118745	NA	NA	NA	NA	NA	NA	NA	NA	NA	NA	NA
chrX	1352232	1352321	IL3RA	0	5	NA	NA	NA	NA	NA	NA	-0.153861	NA	-0.106645	-0.180594	NA	NA	-0.212964	-0.131298
chr19	10681329	10681992	ILF3	1	0	NA	0.0767559	0.0960399	NA	-0.0294645	NA	NA	-0.020777	NA	0.0529539	NA	-0.0613625	0.027252	0.104684
chr16	30001530	30005220	INO80E	0	1	NA	NA	NA	NA	-0.0762315	0.0184	-0.0264455	-0.117834	NA	NA	0.0156443	-0.0953569	NA	-0.0669285
chr1	153747070	153747278	INTS3	1	1	NA	NA	0.0680545	0.0810452	NA	NA	0.136338	-0.102736	NA	0.0640565	NA	-0.0904855	NA	NA
chr1	153747363	153748688	INTS3	1	1	NA	NA	0.0705854	0.092964	NA	NA	0.154118	-0.10701	NA	0.0732426	NA	-0.075622	NA	NA
chr12	30630957	30631894	IPO8	0	4	NA	-0.177054	NA	-0.127051	-0.0708485	0.05914	-0.0720885	NA	-0.0677945	-0.126296	-0.0662285	-0.102211	NA	NA
chr1	32207120	32207239	IQCC	0	1	NA	NA	NA	NA	NA	NA	NA	-0.192406	NA	NA	NA	NA	NA	NA
chr12	25103899	25104008	IRAG2	0	3	NA	NA	NA	NA	NA	NA	-0.159972	NA	NA	-0.100992	NA	-0.152659	NA	NA
chr2	181534935	181535431	ITGA4	0	3	NA	NA	-0.194079	-0.197494	NA	NA	NA	NA	NA	-0.218284	NA	-0.0611715	NA	NA
chr16	30496294	30496435	ITGAL	0	1	NA	NA	NA	NA	NA	NA	NA	-0.139304	NA	NA	NA	NA	NA	NA
chr16	31360463	31361062	ITGAX	1	0	NA	NA	NA	NA	0.083263	NA	NA	NA	NA	NA	NA	0.109563	NA	NA
chr16	31371497	31371629	ITGAX	2	0	NA	NA	NA	NA	0.110394	NA	NA	NA	NA	NA	NA	0.12003	NA	NA
chr1	185305643	185306484	IVNS1ABP	1	0	NA	0.105396	0.0826017	-0.00558105	NA	0.04337	-0.025711	-0.036451	NA	NA	NA	NA	NA	NA
chr1	227734816	227735011	JMJD4	0	3	NA	-0.0503516	NA	-0.083008	-0.091492	-0.0283615	-0.0801545	-0.0513095	-0.0336533	-0.110717	-0.102727	-0.0966584	NA	-0.136667
chr16	683441	683529	JMJD8	2	0	0.0826205	0.121432	0.084074	0.0325701	0.0488495	NA	NA	0.013075	0.071062	0.0291626	0.0414054	0.10516	0.030755	NA
chr11	96390073	96390482	JRKL	0	1	NA	NA	NA	NA	-0.120317	NA	-0.080748	-0.068582	NA	NA	NA	NA	NA	NA
chr9	731266	732377	KANK1	1	0	NA	NA	0.115506	NA	NA	NA	0.0173047	NA	NA	NA	NA	NA	0.0372759	NA
chr19	50316091	50320222	KCNC3	0	1	NA	NA	NA	-0.113433	NA	NA	NA	NA	NA	NA	NA	NA	NA	NA
chr7	128880085	128880385	KCP	1	0	NA	NA	NA	0.149358	NA	NA	NA	NA	NA	NA	NA	NA	NA	NA
chr22	37060922	37061538	KCTD17	2	0	NA	NA	NA	0.113998	0.096236	-0.056336	NA	0.087177	NA	0.029528	0.107392	0.087114	NA	NA
chr22	37061175	37061538	KCTD17	1	0	NA	0.167673	NA	NA	NA	NA	NA	NA	NA	NA	NA	NA	NA	NA
chr22	37061629	37062524	KCTD17	5	0	NA	0.066243	0.147954	0.110785	0.124476	-0.0753995	0.040921	0.10249	NA	0.05154	0.093077	0.0763555	NA	0.128115
chrY	19709809	19710375	KDM5D	2	0	NA	NA	NA	NA	NA	NA	0.109744	NA	NA	0.129661	NA	NA	NA	NA
chr16	67178504	67179429	KIAA0895L	1	0	NA	NA	0.166056	NA	NA	NA	NA	NA	NA	NA	NA	NA	NA	NA
chr10	24542770	24542882	KIAA1217	0	1	NA	NA	NA	NA	NA	NA	0.0221631	-0.0547009	NA	NA	NA	-0.101922	NA	NA
chr9	114092000	114092332	KIF12	1	0	NA	0.0618665	0.052815	NA	NA	NA	NA	NA	NA	NA	0.051771	NA	NA	0.129742
chr9	114092174	114092332	KIF12	2	0	NA	NA	0.110455	NA	NA	NA	NA	NA	NA	NA	0.111888	NA	NA	NA
chr9	114092642	114093228	KIF12	1	0	NA	0.091714	0.11334	0.081785	NA	NA	0.0492071	-0.027696	NA	0.0652551	NA	NA	NA	NA
chr9	114097436	114097606	KIF12	3	0	NA	0.155733	0.157246	0.120542	NA	NA	0.0894915	-0.0368335	NA	0.0895829	NA	NA	NA	NA
chr9	114098190	114098301	KIF12	3	0	NA	NA	0.175266	0.0493895	NA	NA	0.108509	NA	NA	NA	0.156256	NA	NA	NA
chr9	107489050	107489167	KLF4	1	0	0.0567214	0.0290513	0.124733	NA	NA	NA	NA	NA	NA	NA	NA	NA	NA	NA
chr12	27791901	27797714	KLHL42	1	0	NA	NA	NA	NA	NA	NA	NA	-0.0360602	NA	NA	NA	-0.0405993	0.175234	NA
chr12	10378705	10379446	KLRK1	1	0	NA	NA	NA	NA	NA	NA	NA	-0.078077	NA	NA	NA	0.101312	NA	NA
chr17	41514120	41514648	KRT15	1	0	NA	NA	NA	NA	NA	NA	NA	NA	0.0134229	NA	NA	-0.0741759	0.166684	NA
chr14	59473090	59475868	L3HYPDH	3	0	NA	NA	0.153566	0.0464025	0.063779	0.121757	NA	NA	NA	0.039257	NA	NA	0.150152	NA
chr20	62316058	62316670	LAMA5	1	0	0.0623305	NA	0.0244433	NA	0.0540238	NA	NA	NA	NA	0.0375955	NA	NA	0.0583202	0.104458
chr20	62324554	62325315	LAMA5	3	0	0.129	NA	0.106147	NA	0.077794	NA	0.0109635	0.0714775	NA	0.0483629	NA	NA	0.052778	0.148247
chr9	136954826	136955370	LCN12	0	1	NA	NA	NA	NA	NA	NA	-0.112419	NA	NA	0.089411	0.09634	NA	NA	NA
chr10	102108323	102109028	LDB1	2	0	0.120435	0.132848	NA	0.032081	0.0639065	NA	0.028884	-0.0404265	NA	0.087064	NA	NA	0.0476785	NA
chr10	102108323	102109034	LDB1	2	0	0.120435	0.132848	NA	0.032081	0.0639065	NA	0.028884	-0.0341895	NA	0.087064	NA	NA	0.0476785	NA
chr12	51048371	51049033	LETMD1	1	0	NA	NA	NA	NA	NA	NA	NA	0.0495884	NA	NA	NA	0.037497	0.129198	NA
chr12	51048478	51049033	LETMD1	1	0	0.0603005	0.052322	NA	NA	NA	NA	NA	0.0533164	NA	NA	NA	0.069787	0.111033	NA
chr12	51056021	51056143	LETMD1	2	0	0.0202964	NA	NA	NA	0.021587	NA	NA	0.0519514	NA	0.0154144	0.0441001	0.0288121	0.103102	0.104403
chr19	49118018	49118351	LIN7B	2	0	NA	NA	NA	0.175096	NA	NA	NA	NA	0.153991	NA	NA	0.091279	0.0984025	NA
chr12	49103813	49104447	LMBR1L	1	0	0.059009	0.0883733	NA	0.020211	NA	NA	0.103689	-0.045243	NA	0.0304156	NA	NA	NA	NA
chr3	197976111	197976597	LMLN	0	1	NA	NA	NA	NA	NA	NA	NA	-0.11191	NA	NA	NA	NA	NA	NA
chr11	556588	556834	LMNTD2	0	2	NA	NA	-0.12007	NA	NA	NA	NA	-0.108227	NA	NA	NA	NA	NA	NA
chr11	557097	557398	LMNTD2	0	2	NA	NA	-0.189214	NA	NA	NA	NA	NA	NA	NA	NA	-0.147207	NA	NA
chr19	48494109	48497392	LMTK3	1	0	NA	NA	0.100157	NA	NA	NA	NA	NA	NA	NA	NA	NA	NA	NA
chr4	53461042	53461434	LNX1	2	3	NA	NA	-0.0563265	0.167959	-0.271863	NA	-0.092146	-0.041383	0.078841	0.154446	NA	-0.433271	NA	-0.30713
chrX	119013201	119014206	LONRF3	0	1	NA	NA	NA	NA	NA	NA	0.023642	-0.15808	NA	NA	NA	NA	NA	NA
chr20	41352220	41352605	LPIN3	1	0	NA	NA	NA	NA	NA	NA	0.035752	NA	NA	0.108032	NA	NA	NA	NA
chr20	41357188	41357360	LPIN3	3	0	NA	0.106522	0.171498	NA	NA	NA	0.110161	-0.037746	NA	0.069746	NA	NA	NA	NA
chr20	41357447	41357881	LPIN3	6	0	0.140542	0.155242	0.159614	NA	NA	NA	0.104797	0.029288	NA	0.117103	NA	0.111515	NA	NA
chr7	100576777	100576901	LRCH4	1	0	NA	0.124964	NA	NA	NA	NA	NA	-0.0722645	NA	0.0388243	NA	NA	NA	NA
chr7	100577005	100577085	LRCH4	1	0	NA	0.10412	NA	NA	NA	NA	0.0151399	-0.083588	NA	NA	NA	NA	NA	NA
chr1	113093280	113093429	LRIG2	0	1	NA	NA	NA	NA	NA	NA	NA	NA	NA	NA	NA	-0.329985	NA	NA
chr1	113096365	113098704	LRIG2	0	1	NA	NA	NA	NA	NA	NA	NA	NA	NA	NA	NA	-0.206902	NA	NA
chr6	149820703	149826263	LRP11	0	2	-0.0365366	-0.0284107	-0.0616358	NA	-0.062939	-0.0380843	-0.0257746	-0.218742	NA	0.0217	NA	-0.046263	-0.236115	NA
chr8	144518041	144519614	LRRC14	1	0	NA	NA	0.0177625	NA	NA	-0.04275	NA	0.117148	NA	NA	NA	NA	NA	NA
chr11	551302	551650	LRRC56	1	0	NA	NA	NA	NA	NA	NA	NA	NA	NA	NA	NA	0.115863	NA	NA
chr2	237769992	237772080	LRRFIP1	1	0	0.0563744	NA	NA	NA	0.044567	0.0453889	NA	0.039352	NA	NA	NA	0.037185	0.133749	NA
chr2	237772198	237772865	LRRFIP1	1	0	NA	NA	NA	NA	0.0511574	NA	NA	0.0435906	NA	NA	NA	0.0319448	0.134586	NA
chr12	40225282	40225554	LRRK2	0	3	NA	NA	NA	NA	-0.165125	NA	NA	NA	NA	-0.14895	NA	-0.155025	NA	NA
chr7	102468377	102468553	LRWD1	1	0	NA	NA	NA	NA	NA	NA	NA	NA	NA	0.113092	NA	NA	NA	NA
chr14	24315020	24315636	LTB4R	1	1	NA	NA	NA	NA	NA	NA	NA	0.0584705	-0.122617	NA	NA	0.115182	NA	NA
chr7	139374471	139376061	LUC7L2	0	2	NA	NA	NA	NA	NA	0.034529	-0.038702	-0.155668	NA	NA	NA	-0.120586	NA	NA
chr15	99729731	99731717	LYSMD4	1	0	NA	NA	NA	NA	NA	NA	NA	NA	NA	NA	NA	NA	0.119973	NA
chr15	99732007	99733344	LYSMD4	1	0	NA	NA	NA	NA	NA	NA	NA	NA	NA	NA	NA	NA	0.184375	NA
chr22	20994269	20994557	LZTR1	3	0	NA	0.195307	NA	NA	NA	NA	NA	NA	NA	0.0503665	NA	NA	0.170618	0.124143
chr22	38213889	38214419	MAFF	3	0	0.0402636	NA	0.0272187	0.069692	0.0354239	NA	NA	0.159685	NA	0.0438139	0.147468	0.0153843	NA	0.144218
chr9	136856381	136856463	MAMDC4	1	0	NA	NA	NA	NA	NA	NA	0.0687565	NA	NA	0.247104	NA	NA	NA	NA
chr9	136857298	136857366	MAMDC4	1	0	NA	NA	NA	0.289786	NA	NA	NA	NA	NA	NA	0.00515085	NA	NA	NA
chr9	136857586	136857658	MAMDC4	1	0	NA	NA	0.159057	NA	NA	NA	NA	NA	NA	NA	NA	NA	NA	NA
chr15	75358618	75358703	MAN2C1	1	0	NA	0.169764	NA	NA	NA	NA	0.0575075	-0.0885755	NA	0.0554349	NA	NA	NA	NA
chr15	75359153	75359327	MAN2C1	1	0	0.066476	0.108448	0.018616	0.011197	NA	NA	NA	-0.0543625	NA	0.0703538	NA	0.0649475	NA	NA
chr15	75359425	75359619	MAN2C1	1	0	NA	0.133888	0.0356251	0.0206634	NA	NA	NA	-0.077954	NA	0.0693357	NA	0.023814	0.054473	NA
chr15	75362748	75363998	MAN2C1	1	0	NA	0.0756652	0.019634	NA	0.0531305	NA	0.0287515	NA	NA	0.0470007	NA	NA	0.038009	0.119941
chr19	40213188	40213516	MAP3K10	1	0	NA	NA	0.127397	NA	NA	NA	0.079524	NA	NA	NA	NA	NA	NA	NA
chr12	53484365	53485055	MAP3K12	1	0	NA	NA	NA	NA	NA	NA	NA	-0.033761	NA	NA	NA	0.031895	0.156639	NA
chr12	53486622	53486946	MAP3K12	1	0	NA	NA	NA	NA	NA	NA	NA	NA	NA	NA	NA	NA	0.154856	NA
chr1	27364394	27364660	MAP3K6	1	0	0.17616	NA	NA	NA	NA	NA	NA	NA	NA	NA	NA	NA	NA	NA
chr8	143719156	143719342	MAPK15	3	0	NA	NA	NA	NA	NA	NA	NA	NA	NA	0.195623	NA	0.225031	NA	0.247799
chr8	143721880	143722074	MAPK15	2	0	NA	NA	NA	NA	0.133255	NA	NA	NA	NA	NA	NA	0.08717	NA	0.149483
chr17	19381686	19381780	MAPK7	0	1	NA	NA	-0.108752	NA	-0.055044	NA	NA	-0.0970785	NA	-0.0314915	NA	-0.0465455	NA	-0.074341
chr16	1745103	1747028	MAPK8IP3	3	0	NA	0.0622035	0.072191	NA	NA	NA	0.111863	NA	NA	0.139942	NA	NA	0.110014	NA
chr2	27023477	27024095	MAPRE3	1	0	NA	0.182347	NA	NA	NA	NA	NA	NA	NA	NA	NA	NA	NA	NA
chr2	27024252	27025582	MAPRE3	1	0	NA	0.100751	NA	NA	NA	NA	NA	NA	NA	NA	NA	NA	0.0977861	NA
chr2	27024297	27025582	MAPRE3	1	0	NA	0.105549	NA	NA	NA	NA	NA	NA	NA	NA	NA	NA	0.0977861	NA
chr5	10400842	10402058	MARCHF6	1	0	NA	0.0735468	NA	NA	NA	NA	0.112131	-0.0353118	NA	0.0175129	NA	-0.0690855	0.077057	0.0490005
chr14	103498528	103500155	MARK3	1	0	NA	NA	NA	NA	0.0469433	NA	NA	0.033467	NA	NA	NA	0.0111163	0.111066	NA
chr1	46000979	46002804	MAST2	1	1	NA	0.135521	NA	NA	NA	NA	NA	-0.123768	NA	NA	NA	NA	NA	NA
chr16	89915140	89917875	MC1R	0	1	NA	NA	NA	NA	NA	NA	-0.120246	NA	NA	NA	NA	NA	NA	NA
chr5	113043630	113049092	MCC	0	1	NA	NA	NA	NA	NA	NA	NA	-0.102784	NA	NA	NA	NA	NA	NA
chr12	68835984	68836671	MDM2	0	1	NA	NA	NA	-0.0468594	-0.109992	NA	NA	-0.0206061	NA	NA	NA	-0.0910308	NA	NA
chr12	68836749	68839273	MDM2	0	2	NA	NA	NA	NA	-0.136798	NA	NA	NA	NA	-0.029065	NA	-0.113712	NA	NA
chr1	3499924	3500632	MEGF6	1	0	NA	NA	NA	NA	NA	NA	NA	NA	NA	0.107005	NA	NA	NA	NA
chr14	21499600	21499763	METTL3	0	1	-0.0318818	NA	0.016546	NA	-0.028803	NA	NA	-0.037755	NA	NA	NA	-0.0448283	-0.164351	-0.0484791
chr3	15411437	15414020	METTL6	0	1	NA	NA	NA	NA	NA	-0.0585015	NA	-0.109645	NA	NA	NA	NA	NA	NA
chr8	144510722	144510793	MFSD3	1	0	0.104994	0.0374061	NA	NA	0.0413289	NA	NA	0.0296007	NA	NA	NA	0.0619805	NA	NA
chr20	17969141	17969800	MGME1	1	1	NA	-0.088623	0.155775	0.06735	NA	NA	NA	NA	NA	0.0630525	NA	-0.119449	NA	NA
chr1	1627444	1627672	MIB2	1	0	NA	0.085467	NA	NA	NA	NA	NA	NA	0.124112	NA	NA	NA	0.077767	NA
chr1	1628722	1629132	MIB2	0	1	NA	NA	NA	NA	NA	NA	NA	NA	NA	NA	NA	-0.101938	NA	NA
chr1	1629566	1629638	MIB2	0	1	NA	NA	NA	NA	NA	NA	NA	NA	NA	NA	NA	-0.235294	NA	NA
chr7	1434672	1435100	MICALL2	1	0	NA	0.147967	NA	NA	NA	NA	NA	-0.059203	NA	NA	NA	NA	NA	NA
chr7	1438220	1438288	MICALL2	1	0	NA	0.141293	NA	NA	NA	NA	NA	NA	NA	NA	0.04648	NA	NA	NA
chrX	38801487	38802534	MID1IP1	1	3	NA	NA	NA	NA	NA	0.139353	-0.144213	NA	NA	-0.104029	NA	-0.173377	NA	NA
chr22	50489446	50489531	MIOX	1	0	NA	NA	NA	0.110822	NA	NA	NA	NA	NA	0.0454845	NA	NA	NA	NA
chr14	45204212	45204398	MIS18BP1	1	0	NA	NA	NA	NA	NA	NA	NA	NA	NA	NA	NA	0.0076066	0.109714	NA
chr19	14073877	14074389	MISP3	3	0	0.100566	NA	0.056084	NA	0.10764	0.014534	NA	NA	NA	NA	NA	NA	0.161262	NA
chr19	14074463	14074705	MISP3	1	0	0.184248	NA	NA	NA	0.034128	0.065869	NA	0.0469555	NA	-0.0366285	NA	NA	0.08453	NA
chr16	74691463	74692341	MLKL	0	1	NA	NA	NA	NA	NA	NA	NA	-0.111747	NA	NA	NA	NA	NA	NA
chr17	38715828	38716366	MLLT6	5	0	0.192199	0.11974	NA	0.0679409	0.103405	NA	0.102606	NA	NA	0.0629861	NA	0.061685	0.143313	0.032203
chr1	2592720	2592832	MMEL1	1	0	NA	NA	NA	NA	NA	0.035046	NA	0.177599	NA	NA	NA	NA	NA	NA
chr12	55838734	55839495	MMP19	0	1	NA	NA	NA	NA	NA	NA	NA	-0.195396	NA	NA	NA	-0.083852	NA	NA
chr12	55839741	55840666	MMP19	0	1	NA	NA	NA	NA	NA	NA	NA	-0.151585	NA	NA	NA	-0.0578217	NA	NA
chr12	55840882	55841105	MMP19	0	1	NA	NA	NA	NA	NA	NA	NA	-0.178305	NA	NA	NA	NA	NA	NA
chr12	55841236	55842352	MMP19	0	1	NA	NA	NA	NA	NA	NA	NA	-0.220794	NA	NA	NA	0.0428005	NA	NA
chr11	75728989	75731131	MOGAT2	1	0	NA	0.102123	NA	NA	NA	NA	NA	NA	NA	NA	NA	NA	NA	NA
chr7	101198830	101200233	MOGAT3	1	0	NA	0.149216	NA	NA	NA	NA	NA	NA	NA	NA	0.046276	NA	NA	NA
chr6	166366891	166370217	MPC1	1	0	NA	NA	0.0197429	0.0102941	NA	NA	NA	NA	NA	0.0194009	NA	NA	0.105705	NA
chr17	43824005	43825755	MPP3	1	0	NA	NA	NA	NA	NA	NA	NA	0.11958	NA	NA	NA	0.093956	NA	NA
chr22	37023927	37024191	MPST	0	2	NA	NA	NA	-0.397666	NA	NA	NA	NA	NA	NA	-0.12679	NA	NA	NA
chr17	36607802	36607898	MRM1	0	1	NA	NA	NA	NA	NA	NA	NA	-0.104489	NA	NA	NA	NA	NA	NA
chr8	144260374	144260676	MROH1	1	0	0.09527	0.128993	NA	NA	0.0679935	NA	NA	NA	NA	0.0515886	NA	0.0428365	0.0900706	0.085218
chr3	49685962	49686061	MST1	0	1	NA	NA	NA	NA	NA	-0.0256025	-0.084735	NA	NA	-0.13638	0.023818	NA	NA	NA
chr3	49895880	49895960	MST1R	2	0	NA	0.131475	NA	NA	0.116033	NA	NA	NA	NA	NA	NA	0.0204041	NA	NA
chr3	49896107	49896194	MST1R	1	0	NA	0.168933	NA	NA	NA	NA	NA	NA	NA	NA	NA	NA	NA	NA
chr3	49897685	49898050	MST1R	1	0	NA	0.136755	NA	NA	NA	NA	NA	NA	0.0123399	NA	NA	NA	NA	NA
chr10	133401590	133402148	MTG1	1	0	NA	0.0621752	0.0282471	0.0310228	NA	0.046996	0.0185987	NA	NA	0.0151464	0.009547	NA	0.160965	0.0827778
chr20	62202843	62203083	MTG2	2	0	NA	NA	0.109311	0.074923	NA	0.0223135	NA	0.0063075	NA	0.131391	-0.054248	0.0716355	-0.00656	NA
chr1	149929317	149929622	MTMR11	1	0	NA	0.192424	NA	0.0813279	0.055102	NA	NA	-0.0741961	NA	0.0276388	NA	0.01745	NA	NA
chr1	149930547	149930791	MTMR11	1	0	NA	0.13136	NA	NA	NA	NA	NA	-0.0326178	NA	0.0176386	NA	NA	NA	NA
chr1	149930965	149931259	MTMR11	2	0	NA	0.129047	NA	NA	0.156124	NA	NA	NA	NA	0.0308816	NA	NA	NA	NA
chr1	149933530	149933609	MTMR11	1	0	NA	0.0562774	NA	NA	NA	NA	NA	NA	NA	0.0722079	NA	NA	0.113119	NA
chr1	149933698	149933854	MTMR11	2	0	NA	0.133011	NA	NA	NA	NA	0.136813	-0.0619177	NA	0.0142169	NA	NA	0.0777326	NA
chr17	58504488	58504778	MTMR4	2	0	NA	NA	NA	NA	NA	NA	0.152299	-0.055993	NA	0.100152	NA	NA	NA	NA
chr5	177310540	177310667	MXD3	0	1	NA	NA	NA	NA	NA	NA	-0.072249	-0.0842195	NA	NA	NA	-0.093761	NA	-0.153353
chr5	177310697	177311378	MXD3	0	1	NA	NA	NA	NA	NA	NA	-0.0337475	-0.093478	NA	NA	NA	-0.105889	NA	NA
chr5	177311484	177311760	MXD3	0	3	NA	NA	NA	NA	NA	NA	NA	-0.257971	NA	NA	NA	-0.256599	-0.127714	NA
chr1	1353629	1353847	MXRA8	1	1	NA	0.0175729	0.313036	NA	NA	0.0501667	-0.066468	NA	-0.162675	NA	NA	0.0149084	NA	0.0817472
chr15	48151942	48152233	MYEF2	0	1	NA	NA	0.0968154	0.057413	-0.071679	NA	0.094067	-0.109787	NA	0.0247347	NA	-0.086847	NA	NA
chr17	75594972	75596459	MYO15B	1	0	NA	NA	NA	NA	NA	0.108324	0.017763	NA	NA	NA	NA	NA	NA	NA
chr17	75610731	75610899	MYO15B	0	3	NA	-0.187076	NA	-0.143287	NA	NA	NA	NA	NA	-0.117821	NA	NA	NA	NA
chr17	75619476	75619680	MYO15B	1	0	NA	0.0519456	0.104908	NA	NA	NA	NA	0.0415362	NA	NA	NA	0.0785688	-0.0880453	NA
chr19	8550694	8551739	MYO1F	0	1	NA	NA	NA	NA	NA	NA	NA	-0.0958061	NA	NA	NA	NA	-0.126609	NA
chr2	127609715	127609848	MYO7B	1	0	NA	0.111885	NA	NA	NA	NA	NA	NA	NA	NA	NA	NA	NA	NA
chr19	58563504	58569276	MZF1	0	1	NA	NA	0.075896	NA	NA	NA	-0.057917	-0.100386	NA	0.047451	NA	NA	0.092236	NA
chr13	32425955	32427903	N4BP2L1	1	0	NA	NA	NA	NA	NA	NA	NA	NA	NA	NA	NA	NA	0.101764	NA
chr5	178121352	178121473	N4BP3	0	1	NA	NA	NA	NA	NA	NA	NA	-0.100137	-0.0850459	NA	NA	NA	NA	NA
chr11	63945935	63946950	NAA40	0	1	NA	NA	NA	NA	NA	NA	0.04545	-0.0889435	NA	NA	NA	-0.120965	NA	NA
chr17	44005089	44005636	NAGS	0	1	NA	NA	NA	NA	NA	NA	-0.123001	NA	NA	NA	NA	NA	NA	NA
chr8	143577943	143578092	NAPRT	1	0	NA	0.140252	0.0588052	0.0301776	NA	NA	NA	NA	0.0431861	0.0726216	NA	NA	0.0366404	NA
chr13	110634595	110634671	NAXD	6	0	NA	0.149212	NA	0.0226205	0.106484	NA	0.014501	0.02899	0.077906	0.101602	0.050907	0.124872	0.104631	0.16816
chr3	196937631	196939392	NCBP2	0	2	NA	NA	NA	NA	NA	NA	NA	-0.206884	NA	NA	NA	-0.184734	NA	NA
chr16	15696860	15724190	NDE1	0	1	NA	NA	NA	NA	NA	NA	NA	NA	NA	NA	NA	NA	-0.16488	NA
chr9	137216188	137216271	NDOR1	1	0	NA	0.122992	NA	NA	NA	NA	NA	-0.055296	NA	0.058879	NA	NA	0.057652	NA
chr2	37241791	37242634	NDUFAF7	0	1	NA	NA	NA	NA	NA	NA	NA	-0.055461	NA	NA	NA	-0.103576	NA	NA
chr19	44874462	44878372	NECTIN2	1	0	NA	NA	NA	NA	NA	0.20227	-0.055468	NA	NA	NA	NA	NA	NA	NA
chr15	75353866	75354249	NEIL1	1	1	NA	NA	0.094695	NA	NA	0.065883	NA	-0.110884	NA	0.103344	0.096438	NA	NA	NA
chr15	75354277	75354430	NEIL1	1	0	NA	NA	NA	NA	NA	0.0835035	NA	-0.0867055	NA	0.07417	0.116362	NA	NA	NA
chr1	211663652	211667105	NEK2	1	0	NA	NA	NA	NA	NA	NA	NA	0.116184	NA	NA	NA	NA	NA	NA
chr20	58993675	58994109	NELFCD	0	1	NA	-0.0299554	0.0301724	NA	-0.067791	NA	NA	-0.0690066	NA	0.0322187	-0.0164246	-0.111331	NA	NA
chr20	58993764	58994109	NELFCD	0	1	NA	-0.0261194	0.0299889	NA	-0.0697625	NA	NA	-0.0686841	NA	0.032564	-0.0153366	-0.110624	NA	NA
chr5	172684138	172686170	NEURL1B	0	1	NA	NA	NA	NA	NA	NA	NA	NA	NA	-0.380245	NA	NA	NA	NA
chr16	28956058	28956150	NFATC2IP	1	0	NA	0.101647	-0.0422726	NA	NA	NA	NA	NA	NA	0.0195142	NA	NA	0.0249256	NA
chr19	35896128	35896217	NFKBID	0	1	NA	NA	NA	NA	NA	NA	NA	NA	NA	NA	NA	NA	-0.126586	NA
chr19	35896269	35896391	NFKBID	0	1	NA	NA	NA	NA	NA	NA	NA	-0.0942445	NA	NA	NA	-0.112573	NA	NA
chr19	35896831	35896912	NFKBID	1	0	NA	NA	NA	NA	NA	NA	0.123105	NA	NA	NA	NA	NA	NA	NA
chr19	35897058	35897650	NFKBID	1	0	NA	NA	NA	NA	NA	NA	0.10982	NA	NA	NA	NA	0.0960936	NA	NA
chr3	101849917	101852084	NFKBIZ	1	0	NA	NA	NA	NA	NA	NA	NA	0.152614	NA	NA	NA	0.0606486	NA	NA
chr3	101853863	101854577	NFKBIZ	5	0	NA	0.0328843	NA	0.143773	0.168329	0.131793	0.150836	0.174057	NA	NA	NA	0.064668	NA	NA
chr3	101855208	101855394	NFKBIZ	2	0	NA	NA	NA	NA	0.124085	0.0688894	0.0693982	0.133492	NA	-0.089493	NA	NA	NA	NA
chr3	101855458	101855732	NFKBIZ	2	0	NA	NA	NA	NA	0.114461	NA	0.0840247	0.101869	NA	-0.026695	NA	0.0260708	NA	NA
chr3	101855902	101857072	NFKBIZ	2	0	0.132556	NA	NA	NA	0.100859	0.0729468	0.065222	0.080684	NA	NA	NA	NA	NA	NA
chr3	101857183	101857291	NFKBIZ	2	1	NA	NA	NA	NA	0.111013	NA	0.071737	0.113425	NA	-0.054197	NA	NA	NA	-0.143395
chr3	101857459	101859317	NFKBIZ	4	0	0.159525	NA	NA	NA	0.1093	0.0726906	0.0785315	0.122221	NA	NA	NA	0.0570544	0.110455	NA
chr11	129864850	129864965	NFRKB	0	5	NA	-0.361136	-0.157864	-0.103017	NA	NA	NA	0.0282486	-0.118771	-0.146028	NA	NA	NA	NA
chr14	52053938	52054019	NID2	0	2	NA	NA	-0.233955	NA	NA	NA	-0.028336	-0.0961375	NA	-0.126582	NA	-0.050134	NA	NA
chr8	98193090	98194727	NIPAL2	1	0	NA	0.100163	NA	NA	NA	NA	NA	-0.0487455	NA	NA	NA	NA	NA	NA
chr14	36520286	36520556	NKX2-1	0	1	NA	NA	NA	NA	NA	NA	-0.110019	NA	NA	NA	NA	NA	NA	NA
chr10	15132933	15133052	NMT2	0	1	NA	NA	NA	NA	NA	NA	NA	NA	NA	NA	NA	-0.10989	NA	NA
chr16	67170574	67171151	NOL3	1	0	NA	NA	NA	NA	NA	0.185607	NA	NA	NA	NA	NA	NA	NA	NA
chr6	32196150	32196323	NOTCH4	1	2	NA	NA	NA	0.076597	0.082465	NA	-0.210404	NA	NA	-0.101332	NA	0.105329	NA	NA
chr6	32201006	32201116	NOTCH4	0	3	NA	NA	NA	-0.108848	-0.107005	NA	NA	-0.127124	NA	NA	NA	-0.0805288	NA	NA
chr9	137426330	137428032	NOXA1	2	0	NA	0.142899	0.0758623	NA	NA	0.044708	NA	-0.0545145	NA	NA	NA	NA	0.154428	NA
chr9	137429016	137429275	NOXA1	5	0	NA	0.188661	NA	0.103029	0.047695	0.053367	0.016972	-0.0553905	0.209191	0.089967	NA	0.0880685	0.136714	0.138104
chr9	137433074	137433204	NOXA1	2	0	NA	0.157675	0.0698664	NA	0.2	NA	NA	-0.039067	NA	NA	0.0950511	NA	NA	NA
chr9	137433263	137433452	NOXA1	3	1	NA	0.298042	NA	0.128403	NA	NA	0.0406555	-0.18627	NA	0.110505	0.094928	NA	NA	NA
chr9	137433607	137433749	NOXA1	4	1	NA	0.171863	NA	0.134013	NA	NA	0.06099	-0.175658	NA	0.113398	0.151116	NA	NA	NA
chr3	132696813	132697259	NPHP3	0	1	NA	NA	NA	NA	NA	NA	NA	-0.135704	NA	NA	NA	NA	NA	NA
chr9	35808683	35808754	NPR2	2	0	NA	0.19734	NA	NA	NA	0.0355584	0.082354	NA	NA	NA	0.021566	NA	0.260396	NA
chr3	119811726	119812685	NR1I2	1	0	NA	0.108232	NA	NA	NA	NA	NA	NA	NA	NA	0.037984	NA	NA	NA
chr8	143835730	143835819	NRBP2	1	0	NA	0.116628	0.08508	NA	NA	NA	NA	NA	NA	NA	NA	0.0701445	0.0963975	NA
chr8	143836030	143836126	NRBP2	1	0	NA	0.151125	NA	NA	NA	NA	NA	NA	NA	0.0506058	NA	0.0458552	NA	NA
chr4	40761301	40774264	NSUN7	0	1	NA	NA	NA	NA	NA	NA	0.0167156	-0.126461	NA	NA	NA	NA	NA	NA
chr14	105173261	105176533	NUDT14	1	0	NA	0.0233702	0.102104	NA	NA	NA	-0.0260009	NA	NA	-0.0046485	NA	NA	NA	NA
chr3	131362068	131362171	NUDT16P1	0	1	NA	NA	-0.100033	NA	NA	NA	NA	NA	NA	-0.0377825	NA	NA	NA	NA
chr2	219556292	219556453	OBSL1	2	0	NA	NA	0.121095	0.111658	NA	-0.0368955	0.062026	0.0286675	NA	0.026798	NA	-0.09687	NA	NA
chr19	17226869	17226974	OCEL1	1	1	NA	NA	NA	NA	NA	NA	-0.140096	NA	NA	NA	0.148377	NA	NA	NA
chr19	17226869	17226993	OCEL1	3	1	NA	0.138982	NA	0.046326	NA	NA	-0.175773	NA	0.0823	0.188397	0.110922	0.063963	NA	NA
chr1	86383196	86384675	ODF2L	1	0	NA	NA	0.105849	NA	-0.0877904	-0.0580505	-0.059712	-0.01023	NA	-0.0738535	NA	-0.0515762	NA	NA
chr1	86384801	86385457	ODF2L	0	2	NA	NA	NA	NA	-0.0800395	NA	-0.110617	-0.0431245	NA	-0.118253	NA	NA	NA	-0.096719
chr22	50530852	50530936	ODF3B	0	1	NA	NA	NA	-0.107313	NA	NA	NA	NA	0.0419805	NA	NA	0.088633	NA	NA
chr22	50531295	50531569	ODF3B	5	0	NA	0.198003	0.187332	0.051733	0.117521	0.056903	NA	NA	0.070649	NA	0.0570795	0.136925	0.038159	0.203763
chr10	101792943	101797979	OGA	1	0	NA	NA	NA	NA	NA	0.0124733	0.014241	-0.0217665	NA	0.0072155	NA	-0.0270646	0.101721	NA
chrX	71544635	71547906	OGT	4	3	NA	0.190083	0.290427	NA	NA	0.144617	0.0978925	-0.104629	NA	0.19019	0.060044	-0.184081	NA	-0.259277
chr8	144053129	144053208	OPLAH	1	0	NA	0.0776561	NA	NA	0.115689	NA	NA	NA	0.0525722	0.0655209	NA	NA	NA	NA
chr8	144056523	144056617	OPLAH	1	0	NA	0.117278	NA	NA	NA	NA	NA	-0.0533643	NA	NA	0.0225417	NA	NA	NA
chr8	144059079	144059598	OPLAH	1	0	NA	NA	NA	NA	NA	NA	NA	NA	NA	NA	NA	0.141853	NA	NA
chr11	65794248	65794537	OVOL1	1	0	NA	NA	NA	NA	NA	NA	NA	0	-0.033095	0.255147	NA	NA	0.0299877	NA
chr5	41794078	41794166	OXCT1	1	0	NA	NA	0.219464	NA	NA	NA	NA	NA	NA	NA	NA	NA	NA	NA
chr12	56319181	56319307	PAN2	2	0	NA	0.122749	0.143677	0.092538	0.0524565	NA	0.0229495	-0.0721445	NA	0.0609995	NA	-0.0349075	NA	NA
chr12	56322758	56323061	PAN2	2	0	NA	0.189542	0.108351	NA	NA	NA	0.032668	-0.0515335	NA	0.037155	NA	NA	NA	NA
chr12	56323913	56324048	PAN2	1	0	0.072132	NA	0.111867	NA	NA	NA	0.041022	NA	NA	0.0193661	NA	NA	NA	NA
chr8	143983811	143984007	PARP10	2	0	0.0461405	0.176698	0.0463218	NA	0.0735854	0.022805	NA	NA	NA	0.0246306	0.0260312	0.079369	0.0969505	0.109241
chr15	72271287	72272392	PARP6	2	0	NA	NA	0.126599	NA	0.084323	0.103594	0.0736075	NA	NA	0.0578775	NA	NA	NA	NA
chr5	50667186	50668070	PARP8	1	4	NA	NA	-0.253398	NA	-0.189903	-0.129586	0.165964	NA	NA	-0.180897	NA	NA	NA	NA
chr21	32759269	32759776	PAXBP1	2	1	NA	NA	0.11621	NA	NA	NA	0.138619	-0.106168	-0.026589	NA	NA	-0.0967725	NA	NA
chr9	136992700	136992924	PAXX	4	0	0.120373	0.111688	NA	NA	0.100672	NA	NA	NA	0.0662695	0.061705	0.0301	0.146602	NA	NA
chr9	136992974	136993052	PAXX	1	0	0.077736	0.15346	NA	0.016277	NA	0.029953	0.033295	-0.05288	NA	0.0976585	NA	0.066015	NA	0.083875
chr2	74505190	74505338	PCGF1	1	0	0.197821	NA	NA	NA	NA	NA	-0.0476775	NA	0.0963905	NA	NA	NA	NA	0.021701
chr2	74507147	74507575	PCGF1	1	0	NA	NA	0.004844	0.146667	NA	NA	0.036486	NA	NA	0.062013	NA	NA	0.067861	NA
chr2	74507147	74507357	PCGF1	2	0	NA	NA	NA	0.172035	0.039339	NA	NA	0.055279	0.0696725	0.148062	NA	NA	0.073009	NA
chr21	46443948	46444693	PCNT	1	0	NA	0.114043	NA	NA	NA	NA	NA	NA	NA	NA	NA	0.036309	NA	0.05339
chr19	1487861	1487963	PCSK4	0	1	NA	NA	NA	NA	NA	NA	-0.178378	NA	NA	NA	NA	NA	NA	NA
chr4	119502655	119504535	PDE5A	3	1	NA	NA	-0.136495	NA	0.10104	0.0062118	-0.0921235	0.0603955	NA	-0.040728	NA	0.113142	0.159613	NA
chr4	119511134	119519044	PDE5A	1	0	NA	NA	NA	NA	NA	NA	NA	NA	NA	NA	NA	NA	0.100819	NA
chr8	65727301	65734793	PDE7A	0	1	NA	NA	NA	NA	-0.101984	NA	NA	-0.0452314	NA	NA	NA	-0.0779211	NA	NA
chr5	132271466	132271790	PDLIM4	2	2	-0.0454655	NA	0.0340611	0.113656	NA	NA	-0.0751253	-0.104511	NA	0.146138	NA	-0.119239	NA	NA
chr11	119187700	119187939	PDZD3	2	0	NA	0.134425	NA	NA	NA	NA	NA	NA	NA	0.107135	NA	NA	NA	NA
chr11	119188144	119188354	PDZD3	2	0	NA	NA	NA	0.266056	NA	NA	NA	NA	NA	0.176254	NA	NA	NA	NA
chr17	8266898	8267027	PFAS	0	1	NA	NA	NA	NA	NA	NA	NA	-0.124192	NA	NA	NA	NA	NA	NA
chr11	291113	291975	PGGHG	1	2	NA	NA	0.145675	NA	NA	NA	NA	-0.110138	NA	NA	NA	NA	NA	-0.121558
chr11	293502	293593	PGGHG	1	0	NA	0.090618	0.120935	NA	NA	NA	NA	-0.05105	NA	0.035034	NA	NA	NA	NA
chr11	74368575	74370901	PGM2L1	0	1	NA	NA	NA	NA	NA	NA	-0.341007	NA	NA	NA	NA	NA	NA	NA
chr6	169705321	169705615	PHF10	1	3	-0.130205	-0.170499	0.129297	NA	-0.037474	NA	-0.049906	0.035909	NA	-0.0316595	NA	-0.082559	NA	-0.149471
chr5	178225429	178229939	PHYKPL	2	0	NA	0.110696	0.0411789	NA	NA	NA	NA	NA	NA	NA	0.0253949	0.042134	0.101899	NA
chr5	178230099	178231404	PHYKPL	2	0	NA	0.111374	NA	NA	0.0379014	NA	0.0197645	0.0350095	NA	NA	0.0295735	0.01345	0.104638	NA
chr5	178231523	178232491	PHYKPL	2	0	NA	0.1107	NA	NA	NA	NA	NA	NA	NA	NA	0.0443363	0.034642	0.146704	NA
chr11	800912	800984	PIDD1	1	0	NA	NA	NA	NA	NA	NA	NA	-0.009542	NA	NA	0.151942	0.024804	NA	NA
chrX	15324871	15325019	PIGA	0	1	NA	NA	NA	NA	NA	NA	NA	-0.12628	NA	NA	NA	NA	NA	NA
chr4	527230	530435	PIGG	0	2	NA	NA	0.0446668	NA	-0.057105	NA	NA	-0.105185	NA	NA	NA	-0.0608196	-0.184936	NA
chr3	196948685	196951820	PIGZ	1	0	NA	0.275857	NA	NA	NA	NA	NA	NA	NA	NA	NA	NA	NA	NA
chr17	8881881	8884706	PIK3R5	1	0	NA	NA	NA	NA	NA	NA	NA	NA	NA	NA	NA	0.101174	NA	NA
chr16	2090808	2090883	PKD1	1	1	NA	NA	0.102389	NA	NA	NA	NA	NA	NA	-0.155	NA	NA	NA	NA
chr16	2092592	2092953	PKD1	1	0	0.0868282	0.0873235	NA	NA	0.0825745	0.0204531	0.008412	NA	NA	NA	NA	0.0787367	0.0695337	0.111728
chr16	2093093	2093543	PKD1	2	0	0.0897675	0.121061	NA	NA	0.0754202	NA	0.0226285	0.015375	NA	NA	NA	0.0466044	0.0756847	0.14721
chr15	40290672	40290760	PLCB2	1	0	NA	NA	NA	NA	NA	NA	NA	NA	NA	NA	NA	0.107091	NA	NA
chr2	218634221	218634457	PLCD4	2	1	NA	NA	-0.249722	0.215957	NA	NA	NA	NA	NA	0.308547	NA	NA	NA	NA
chr2	218634630	218635795	PLCD4	2	0	NA	NA	-0.070683	0.168713	NA	0.094048	NA	-0.094778	NA	0.118089	NA	NA	NA	NA
chr2	218636392	218636470	PLCD4	3	1	NA	NA	-0.185161	0.131903	NA	0.185347	NA	-0.067962	NA	0.257099	NA	NA	NA	NA
chr20	41162725	41162957	PLCG1	2	0	NA	0.172343	0.109493	NA	0.034356	0.034471	0.020277	NA	NA	NA	NA	NA	0.063614	NA
chr19	39420852	39420948	PLEKHG2	0	1	NA	NA	NA	NA	NA	NA	NA	NA	NA	NA	NA	-0.110991	NA	NA
chr19	39420996	39421074	PLEKHG2	0	1	NA	NA	NA	NA	NA	NA	NA	-0.0535689	NA	NA	NA	-0.105501	NA	NA
chr1	6468586	6469041	PLEKHG5	1	0	NA	NA	NA	NA	0.107619	NA	-0.0524015	NA	-0.0419095	-0.031656	NA	NA	NA	NA
chr14	67569216	67569920	PLEKHH1	1	0	NA	0.125197	0.09539	NA	NA	NA	0.0569095	NA	NA	NA	NA	NA	NA	NA
chrX	154461638	154462127	PLXNA3	2	0	NA	NA	NA	NA	NA	NA	NA	NA	0.155361	NA	NA	NA	0.137041	NA
chrX	154464868	154465017	PLXNA3	1	0	NA	NA	NA	NA	NA	NA	0.0191995	NA	NA	NA	NA	NA	0.148119	NA
chrX	154466270	154466375	PLXNA3	1	0	NA	0.123004	NA	NA	NA	NA	NA	NA	NA	NA	NA	NA	NA	NA
chr3	48413169	48413669	PLXNB1	3	0	0.109841	0.185489	0.0316997	0.0290586	0.0720216	NA	0.0461082	-0.0215755	NA	0.0471142	NA	0.0797749	0.105282	0.069816
chr3	48425333	48429252	PLXNB1	1	0	NA	NA	0.113637	NA	NA	NA	NA	NA	NA	NA	NA	NA	0.0455223	NA
chr2	189864228	189867798	PMS1	1	0	NA	NA	NA	NA	NA	NA	NA	NA	NA	NA	NA	NA	0.114666	NA
chr1	53082188	53084512	PODN	0	2	-0.0553688	-0.0809449	NA	NA	-0.101586	-0.009182	-0.0944528	-0.059439	-0.133925	NA	NA	-0.0862473	-0.0358239	NA
chr10	77985985	77986072	POLR3A	0	1	NA	NA	NA	NA	NA	NA	NA	-0.102533	NA	NA	NA	NA	NA	NA
chr22	41530888	41532093	POLR3H	0	1	NA	-0.247985	NA	NA	-0.0234707	-0.0230555	-0.0531458	-0.0206907	-0.0431307	-0.0630982	NA	-0.0404913	-0.0747476	NA
chr22	41532157	41532658	POLR3H	0	1	NA	-0.268276	NA	NA	-0.0450328	-0.0237963	-0.0696874	-0.023573	-0.0560247	-0.0951207	NA	-0.0577458	-0.045109	NA
chr19	49149718	49150079	PPFIA3	0	2	NA	NA	NA	NA	NA	NA	-0.08126	NA	NA	-0.111398	NA	NA	-0.133502	NA
chr3	52246048	52246694	PPM1M	1	0	NA	NA	NA	NA	0.0841065	0.084128	0.048733	0.061395	NA	NA	NA	0.114708	NA	NA
chr19	55093076	55093152	PPP1R12C	2	0	NA	0.0979023	NA	NA	0.0300866	0.0148555	NA	NA	NA	0.0198932	NA	NA	0.111303	0.111997
chr9	135484082	135484448	PPP1R26	0	1	NA	NA	NA	-0.080111	-0.032423	NA	-0.081698	NA	NA	-0.115565	-0.040562	NA	-0.052209	NA
chr7	100435533	100435630	PPP1R35	0	3	-0.108524	-0.031314	-0.124831	-0.091062	-0.096896	NA	-0.100872	-0.077838	-0.0371645	-0.0502785	NA	NA	NA	NA
chr7	100435767	100435847	PPP1R35	0	1	-0.061324	0.052327	-0.12275	NA	-0.085646	NA	-0.055615	-0.0600855	NA	-0.062794	NA	NA	NA	NA
chr14	23299541	23300757	PPP1R3E	0	1	NA	NA	NA	NA	NA	0.096658	-0.120889	NA	NA	NA	NA	NA	NA	NA
chr17	50140228	50141268	PPP1R9B	0	1	NA	NA	NA	-0.101979	NA	NA	NA	-0.019628	NA	-0.0331588	NA	NA	NA	NA
chrX	338710	338777	PPP2R3B	2	0	NA	0.128417	NA	NA	NA	NA	NA	NA	NA	NA	NA	NA	0.123476	NA
chr11	64931489	64931558	PPP2R5B	1	0	0.0586665	0.0887144	NA	NA	0.0319333	NA	NA	-0.00672445	NA	NA	0.0875912	0.0077257	NA	0.118309
chr2	44321900	44322730	PREPL	1	1	NA	NA	-0.112667	NA	NA	NA	0.0219612	-0.0213208	NA	0.127153	NA	NA	NA	NA
chr8	68099843	68108108	PREX2	1	0	NA	NA	NA	NA	NA	NA	NA	NA	NA	0.201539	NA	NA	NA	NA
chr12	119672464	119673963	PRKAB1	0	1	NA	NA	-0.0107235	NA	NA	NA	NA	NA	NA	NA	-0.319213	NA	NA	NA
chr12	119674057	119674339	PRKAB1	0	1	NA	NA	-0.00714555	-0.00923523	NA	NA	NA	NA	NA	NA	-0.321878	NA	NA	NA
chr12	119674454	119676536	PRKAB1	0	1	NA	NA	-0.00819575	-0.00763959	NA	NA	NA	NA	NA	NA	-0.203368	NA	NA	NA
chr21	46658920	46660832	PRMT2	0	1	NA	NA	NA	-0.0508493	-0.077978	-0.019495	-0.037909	-0.069353	-0.0439615	-0.0194705	-0.105099	-0.0549105	NA	NA
chr19	35758226	35759373	PROSER3	1	0	NA	NA	NA	NA	NA	NA	NA	NA	NA	NA	NA	NA	0.100137	NA
chr6	30561508	30561833	PRR3	1	0	NA	NA	NA	NA	NA	NA	0.033065	NA	NA	NA	NA	NA	0.141587	NA
chr10	24856995	24858391	PRTFDC1	0	1	NA	NA	NA	NA	NA	NA	NA	-0.128026	NA	NA	NA	NA	NA	NA
chr1	226870649	226871261	PSEN2	1	0	NA	NA	0.306784	NA	NA	NA	NA	NA	NA	0.0083395	NA	NA	NA	NA
chr17	39989793	39997793	PSMD3	0	1	NA	NA	NA	NA	NA	NA	NA	-0.101609	NA	NA	NA	-0.0821055	NA	NA
chr1	96785254	96804799	PTBP2	1	0	NA	NA	NA	NA	NA	NA	NA	NA	NA	NA	NA	NA	0.10201	NA
chr1	96812928	96813028	PTBP2	2	0	NA	NA	NA	NA	0.136475	NA	0.0481255	0.016955	NA	NA	NA	-0.047712	0.145049	NA
chr1	96813106	96813272	PTBP2	1	0	NA	NA	NA	NA	NA	NA	0.0556287	0.032637	NA	NA	NA	NA	0.1628	NA
chr1	96813106	96813275	PTBP2	1	0	NA	NA	NA	NA	NA	NA	0.0556287	0.032645	NA	NA	NA	NA	0.160588	NA
chr20	63530927	63532525	PTK6	0	3	NA	NA	NA	NA	-0.13916	NA	NA	-0.204687	NA	NA	NA	-0.146809	NA	NA
chr2	130370190	130370556	PTPN18	2	4	NA	0.041948	0.12332	NA	NA	-0.192836	0.153937	-0.171801	NA	NA	NA	-0.105766	-0.058676	-0.265522
chr12	6951520	6951608	PTPN6	1	0	NA	0.0615096	NA	NA	0.0305124	NA	NA	NA	NA	NA	NA	0.0452905	0.107426	NA
chr18	8376597	8378264	PTPRM	1	0	0.105571	NA	NA	0.0310885	0.0324693	0.0246596	0.0316635	NA	NA	0.032863	NA	0.0463152	NA	NA
chr5	140108219	140114040	PURA	1	0	NA	NA	NA	NA	NA	NA	NA	NA	NA	NA	NA	NA	0.160962	NA
chr19	10712867	10712952	QTRT1	0	1	NA	-0.177145	-0.0715268	-0.0638682	NA	NA	-0.0214474	NA	NA	NA	NA	NA	NA	NA
chr2	237578155	237585997	RAB17	1	0	NA	0.10145	0.0827391	0.0264945	NA	NA	NA	-0.0396165	NA	0.00885525	0.0221016	NA	NA	NA
chr5	177302178	177302396	RAB24	2	0	0.0505355	0.125814	NA	0.0563686	NA	NA	NA	NA	0.0682678	0.0418181	NA	0.050084	0.093179	0.129517
chr20	419731	420870	RBCK1	5	0	0.195224	0.109899	NA	NA	0.082737	0.060525	NA	NA	0.0834897	NA	NA	0.109659	0.121361	0.160203
chr11	66625678	66626460	RBM14	1	0	NA	NA	0.127883	-0.0105639	NA	0.0355677	NA	-0.050186	NA	NA	0.0221907	NA	NA	NA
chr7	128335679	128335846	RBM28	0	1	NA	NA	NA	NA	NA	NA	0.0600725	-0.151924	NA	0.051213	NA	-0.0920345	NA	NA
chr11	66845036	66845165	RCE1	0	1	NA	NA	NA	NA	NA	NA	NA	-0.105082	NA	NA	NA	NA	NA	NA
chr14	24177383	24177464	REC8	2	0	NA	NA	NA	NA	0.150918	NA	NA	NA	NA	0.25641	NA	0.067602	NA	NA
chr14	24177758	24178090	REC8	4	0	NA	NA	NA	0.200178	0.253084	NA	NA	NA	NA	NA	NA	0.156772	0.414265	NA
chr14	24179133	24179396	REC8	1	0	NA	NA	NA	NA	NA	0.107788	NA	NA	NA	NA	NA	0.0967385	NA	NA
chr14	24179726	24179799	REC8	3	0	NA	NA	NA	0.187065	0.114849	0.139849	NA	NA	NA	NA	NA	NA	NA	NA
chr8	144512067	144512143	RECQL4	1	8	-0.15072	-0.132092	NA	-0.316019	NA	0.141674	-0.185969	-0.16323	NA	-0.21414	NA	-0.241778	NA	-0.257035
chr17	75629475	75629707	RECQL5	4	0	0.14738	NA	0.0965412	0.115838	NA	NA	0.0505785	NA	NA	0.15914	NA	NA	NA	0.135199
chr17	75630277	75630618	RECQL5	0	1	NA	-0.117197	NA	0.0481285	NA	NA	NA	NA	NA	0.0397535	NA	NA	NA	NA
chr17	75630692	75630778	RECQL5	0	1	NA	-0.149998	NA	NA	NA	NA	NA	NA	NA	NA	NA	NA	NA	NA
chr7	150369868	150370759	REPIN1	1	0	NA	NA	NA	-0.0413965	NA	NA	-0.082242	NA	NA	-0.071812	0.107582	NA	0.0590355	NA
chr7	150369868	150371230	REPIN1	1	0	NA	NA	NA	-0.0297375	NA	NA	-0.0667955	NA	NA	-0.0811325	0.106154	NA	0.072416	NA
chr19	18589077	18589412	REX1BD	5	0	0.19082	0.154258	NA	0.033045	0.085916	NA	0.057062	NA	0.081039	0.025328	0.0821945	0.180324	0.157302	0.101892
chr19	18589077	18589478	REX1BD	5	0	0.19082	0.154941	NA	0.0428045	0.085171	NA	0.066525	NA	0.071707	0.0264585	0.080259	0.16296	0.157302	0.125278
chr3	186790064	186790141	RFC4	0	2	NA	NA	NA	NA	-0.117721	-0.048672	NA	-0.08741	-0.0412143	-0.040808	NA	-0.173189	-0.065048	-0.0886975
chr17	82049842	82049917	RFNG	1	0	0.0994155	0.08732	NA	NA	0.0496475	0.030861	NA	0.0277413	NA	NA	0.0460829	0.0554134	0.0685009	0.162028
chr17	82050006	82050401	RFNG	1	0	0.0599265	0.144951	NA	NA	0.0141908	NA	0.001842	NA	NA	NA	0.0310608	0.0511038	0.0664131	0.0478225
chr19	6007802	6008105	RFX2	0	1	NA	NA	NA	NA	NA	NA	NA	-0.103617	NA	NA	NA	-0.076117	NA	NA
chr6	33295759	33296027	RGL2	3	0	0.137815	NA	NA	NA	0.097203	0.051079	0.159245	NA	NA	NA	NA	NA	NA	0.164353
chr19	11402247	11402454	RGL3	1	0	NA	NA	0.065405	0.0849915	0.0679915	NA	NA	NA	NA	0.137326	NA	NA	NA	NA
chr2	226836087	226838072	RHBDD1	0	1	NA	NA	NA	NA	NA	NA	NA	NA	NA	-0.119992	NA	NA	NA	NA
chr22	29264218	29265478	RHBDD3	3	0	0.071008	0.152015	0.114369	NA	NA	NA	-0.04958	-0.0410905	0.094489	0.0271645	NA	0.0723775	NA	0.115819
chr16	60539	61119	RHBDF1	1	0	NA	0.10062	0.044239	NA	NA	NA	NA	-0.072435	NA	NA	NA	NA	NA	NA
chr16	64829	64898	RHBDF1	1	0	NA	NA	NA	NA	NA	NA	NA	-0.047278	NA	NA	NA	NA	NA	0.118366
chr8	23005475	23005959	RHOBTB2	0	1	NA	-0.232761	NA	NA	NA	NA	NA	-0.0935806	NA	-0.0456184	NA	NA	NA	NA
chr1	112701695	112702605	RHOC	4	2	NA	0.146156	NA	-0.109522	-0.076574	0.104573	-0.104849	0.058119	NA	-0.092277	NA	NA	0.301242	0.173839
chr8	143378346	143378695	RHPN1	1	1	NA	NA	NA	NA	NA	NA	NA	-0.101186	NA	NA	NA	0.128917	NA	NA
chr8	143379508	143379828	RHPN1	1	0	NA	NA	0.089199	NA	NA	NA	NA	NA	NA	0.071297	NA	0.175242	NA	NA
chr8	143380175	143380588	RHPN1	3	0	NA	NA	0.063149	0.0810505	0.141875	0.0688485	NA	-0.0635095	NA	0.0759575	NA	0.197749	NA	0.288863
chr8	143381344	143381571	RHPN1	1	0	NA	NA	NA	NA	0.140651	NA	NA	-0.0283756	NA	NA	NA	NA	NA	NA
chr9	5765798	5768969	RIC1	0	1	NA	NA	NA	-0.095145	NA	NA	-0.0333735	NA	NA	-0.119668	NA	NA	NA	NA
chr9	5772741	5772891	RIC1	0	1	NA	NA	NA	NA	NA	NA	NA	NA	NA	-0.116923	NA	NA	0.0693863	NA
chr11	66335251	66335406	RIN1	0	1	NA	NA	NA	NA	NA	NA	NA	-0.062921	NA	NA	NA	-0.125045	NA	NA
chr11	66335498	66335609	RIN1	0	1	NA	0.0731383	NA	NA	NA	NA	NA	-0.101288	NA	NA	NA	-0.0879905	NA	NA
chr14	24338040	24338248	RIPK3	1	0	NA	0.115169	NA	NA	NA	NA	NA	-0.063687	NA	NA	NA	NA	0.0787426	NA
chr14	24338567	24339014	RIPK3	1	0	NA	0.153214	NA	NA	0.0842625	NA	0.0172625	-0.0935655	NA	NA	NA	NA	0.098631	NA
chr20	50597710	50602071	RIPOR3	1	0	NA	NA	0.133421	NA	NA	NA	NA	NA	NA	NA	NA	NA	NA	NA
chr18	23524174	23524428	RMC1	1	0	NA	NA	0.206637	NA	NA	NA	NA	-0.047866	NA	0.027899	NA	-0.082457	NA	NA
chr8	86468707	86470217	RMDN1	0	1	NA	NA	NA	NA	NA	NA	NA	-0.234256	NA	NA	NA	NA	NA	NA
chr2	101271744	101272841	RNF149	1	0	NA	NA	NA	0.0462415	0.112645	NA	NA	0.072347	NA	NA	NA	NA	NA	NA
chr1	6207511	6208880	RNF207	2	0	NA	NA	0.212101	NA	NA	NA	NA	NA	NA	NA	NA	NA	0.201439	NA
chr1	6212903	6213065	RNF207	1	0	NA	NA	0.160034	NA	NA	NA	NA	NA	NA	NA	NA	NA	NA	NA
chr6	30071691	30073156	RNF39	1	0	NA	NA	NA	NA	NA	0.080495	NA	0.0378025	0.097836	NA	NA	NA	0.135525	NA
chr11	124878131	124878297	ROBO3	1	0	NA	NA	NA	NA	NA	NA	NA	-0.024021	NA	0.110071	NA	NA	NA	NA
chr16	4797840	4797937	ROGDI	1	0	NA	0.0768394	NA	NA	NA	NA	NA	NA	NA	NA	NA	0.014609	0.101519	NA
chr10	90902344	90903191	RPP30	0	2	NA	NA	0.071136	0.054017	NA	NA	0.0569425	-0.0700485	NA	NA	NA	-0.134017	-0.102031	NA
chr6	7181246	7181869	RREB1	0	3	NA	NA	NA	NA	-0.149264	NA	NA	-0.037826	-0.175309	NA	NA	-0.133399	NA	NA
chr12	122519051	122520503	RSRC2	1	0	NA	NA	0.11461	NA	NA	NA	0.062225	NA	NA	NA	NA	NA	0.087673	NA
chr20	63687770	63687936	RTEL1	1	0	NA	NA	NA	NA	NA	NA	NA	NA	NA	0.120358	NA	NA	NA	NA
chr6	83194652	83195594	RWDD2A	1	0	NA	NA	NA	NA	NA	NA	0.051965	NA	NA	NA	NA	NA	0.121544	NA
chr19	5587399	5587700	SAFB2	0	1	NA	NA	-0.0229014	-0.0355614	NA	NA	-0.041944	-0.113656	NA	NA	-0.043893	-0.0486	NA	NA
chr6	31764159	31764265	SAPCD1	1	3	NA	NA	NA	-0.214565	NA	NA	0.163612	NA	NA	-0.246508	NA	NA	NA	-0.325755
chr17	28384569	28384838	SARM1	2	1	NA	NA	NA	NA	NA	0.191029	-0.079808	NA	NA	NA	NA	-0.133412	0.274013	NA
chr17	28384930	28385039	SARM1	1	0	NA	NA	NA	NA	NA	0.107606	NA	NA	NA	-0.083859	NA	-0.098114	NA	NA
chrX	17737680	17746017	SCML1	1	0	NA	NA	0.182727	NA	NA	NA	NA	NA	NA	NA	NA	NA	NA	NA
chr3	195960086	195963299	SDHAP1	1	1	NA	NA	0.085606	NA	NA	0.0576085	NA	0.0910725	NA	-0.12599	NA	0.0668005	0.123736	NA
chr5	1579484	1584983	SDHAP3	1	2	NA	NA	0.106984	NA	-0.139231	NA	-0.0896615	NA	NA	0.06155	NA	-0.140075	NA	NA
chr1	151369189	151369441	SELENBP1	1	0	0.0994649	0.0953426	0.0331953	0.0311179	0.0624769	0.0161401	0.0113137	0.0269659	NA	0.0427759	0.0192217	0.0484286	0.103104	0.0973071
chr22	50206520	50208535	SELENOO	0	1	NA	NA	0.024384	0.083942	NA	NA	-0.0702115	-0.055257	NA	0.0718259	0.0415309	-0.131355	NA	NA
chr3	50273646	50273758	SEMA3B	2	0	NA	0.119073	NA	NA	NA	NA	0.0709695	NA	NA	NA	NA	NA	0.108138	NA
chr3	50275053	50275301	SEMA3B	1	0	NA	0.132678	NA	NA	0.0681664	NA	NA	NA	NA	0.0280658	NA	NA	0.0452905	NA
chr10	100980693	100980821	SEMA4G	0	2	NA	0.0416615	NA	NA	NA	NA	NA	-0.163677	NA	NA	NA	NA	-0.243947	NA
chr2	109544324	109546049	SEPTIN10	0	1	NA	NA	0.039215	-0.084335	-0.0577605	0.035368	-0.071736	0.0516835	-0.0776435	-0.116699	NA	-0.075481	0.031922	0.063893
chr14	94388660	94388800	SERPINA1	1	0	NA	NA	NA	NA	NA	NA	NA	NA	NA	-0.0740405	0.462935	NA	NA	NA
chr14	94388660	94388818	SERPINA1	2	0	NA	NA	NA	NA	0.194313	NA	NA	NA	NA	NA	0.45522	NA	NA	NA
chr14	94388663	94388818	SERPINA1	2	0	NA	NA	NA	NA	0.225715	NA	NA	NA	NA	-0.093418	0.500346	NA	NA	NA
chr14	94388663	94388800	SERPINA1	2	1	NA	NA	NA	NA	0.230346	NA	NA	-0.162088	NA	-0.0921975	0.569337	NA	NA	NA
chr17	1752790	1754121	SERPINF2	0	1	NA	NA	NA	0.0308383	NA	NA	NA	-0.138435	NA	0.0270775	0.00883524	0.0309193	NA	NA
chr16	58515564	58515790	SETD6	1	0	NA	NA	0.124074	NA	NA	NA	NA	NA	NA	NA	NA	NA	NA	NA
chr1	150959347	150960562	SETDB1	0	2	NA	NA	NA	NA	-0.1265	NA	NA	-0.0453178	NA	NA	-0.21194	-0.0993214	NA	NA
chr1	150961191	150962129	SETDB1	0	1	NA	NA	NA	NA	NA	NA	-0.04684	-0.030785	NA	-0.0413485	-0.141837	-0.0724751	NA	NA
chr22	31613530	31613601	SFI1	1	0	NA	0.147122	NA	NA	NA	NA	NA	NA	NA	NA	NA	NA	NA	NA
chr22	31613855	31614788	SFI1	2	0	NA	0.117455	NA	NA	0.0911555	NA	NA	NA	NA	0.0622046	NA	NA	0.127988	0.005047
chr17	2372488	2372952	SGSM2	1	0	NA	NA	0.0554018	NA	NA	NA	0.0329888	NA	NA	NA	NA	0.069634	0.101641	NA
chr19	6754731	6754830	SH2D3A	1	0	NA	NA	NA	NA	NA	NA	-0.0369172	-0.0666318	NA	0.109409	NA	-0.0509689	NA	NA
chr4	2824730	2825125	SH3BP2	1	0	NA	0.124535	NA	NA	NA	NA	NA	-0.0255275	NA	0.0252629	-0.032896	NA	0.0723935	NA
chr9	129010693	129012235	SH3GLB2	1	0	0.068324	0.0610084	NA	NA	NA	0.0574422	NA	-0.038058	NA	0.0385616	NA	NA	0.0919823	0.101986
chr10	103603789	103605797	SH3PXD2A	1	0	NA	NA	0.204959	NA	NA	NA	NA	NA	NA	NA	NA	NA	NA	NA
chr5	146049245	146055980	SH3RF2	0	1	NA	NA	NA	NA	NA	NA	NA	-0.124861	0.0093394	NA	NA	NA	NA	NA
chr22	50722437	50730720	SHANK3	0	2	NA	NA	NA	-0.030822	-0.0808335	0.054539	NA	-0.128312	NA	NA	NA	-0.144111	NA	NA
chr19	10091353	10091475	SHFL	2	0	NA	0.105476	0.080887	NA	NA	NA	NA	-0.032396	NA	NA	NA	NA	NA	0.155614
chr5	132825073	132825162	SHROOM1	0	1	0.059373	NA	NA	NA	-0.078733	NA	NA	-0.0795785	-0.117542	NA	NA	NA	-0.0687375	NA
chr11	233534	236047	SIRT3	1	0	NA	NA	NA	NA	NA	0.0183523	0.061301	-0.0348915	NA	0.0269829	NA	NA	0.102382	NA
chr3	170357763	170359698	SKIL	1	0	NA	NA	0.100362	NA	NA	NA	NA	NA	NA	0.053842	NA	0.005357	NA	NA
chr8	133060200	133074852	SLA	0	1	NA	NA	NA	NA	NA	NA	-0.223666	NA	NA	NA	NA	NA	NA	NA
chr10	89436319	89438603	SLC16A12	1	0	NA	NA	0.0436289	0.073835	NA	NA	NA	NA	NA	0.111955	NA	NA	NA	NA
chr17	75088044	75089150	SLC16A5	0	1	NA	NA	NA	NA	NA	NA	-0.101601	NA	NA	NA	NA	NA	NA	NA
chr17	75098181	75100006	SLC16A5	1	0	-0.0852525	0.100991	NA	NA	NA	NA	0.032288	-0.0619225	NA	NA	NA	0.0487545	NA	NA
chr17	75104180	75105879	SLC16A5	1	0	NA	NA	NA	NA	0.052107	0.0288405	NA	NA	NA	-0.061072	NA	0.11243	NA	NA
chr16	89199816	89201261	SLC22A31	1	0	NA	NA	NA	NA	0.152244	NA	NA	NA	NA	NA	NA	NA	NA	NA
chr19	19105727	19106268	SLC25A42	1	0	NA	NA	NA	NA	NA	NA	0.0423895	NA	NA	0.135245	NA	NA	NA	NA
chr11	65380175	65381914	SLC25A45	1	0	NA	NA	NA	NA	NA	NA	NA	NA	NA	NA	NA	NA	0.129756	NA
chr3	48627052	48627945	SLC26A6	1	0	NA	0.102429	NA	NA	NA	NA	0.0210695	-0.0604425	NA	NA	NA	NA	NA	NA
chr3	48627055	48627945	SLC26A6	1	0	NA	0.102603	NA	NA	NA	NA	NA	-0.0536993	NA	NA	NA	NA	NA	NA
chr3	48629711	48629871	SLC26A6	0	1	NA	0.0932539	NA	NA	NA	NA	NA	-0.120219	NA	NA	NA	NA	NA	NA
chr3	48632044	48632244	SLC26A6	1	0	NA	0.120945	NA	NA	NA	NA	NA	NA	NA	NA	NA	NA	NA	NA
chr3	48633635	48635370	SLC26A6	1	0	NA	0.165188	NA	NA	NA	NA	NA	NA	NA	NA	NA	NA	NA	NA
chr1	153776164	153776517	SLC27A3	0	1	NA	NA	NA	NA	NA	NA	NA	-0.176942	NA	NA	NA	NA	NA	NA
chr1	153777885	153778160	SLC27A3	0	1	NA	NA	NA	NA	NA	NA	NA	NA	NA	NA	-0.119506	NA	-0.0270865	NA
chr11	66364424	66365935	SLC29A2	1	3	-0.0618345	-0.269883	-0.0251676	NA	-0.378285	NA	-0.04931	NA	NA	0.176035	NA	-0.384402	NA	NA
chr11	66366021	66366125	SLC29A2	1	4	-0.158758	-0.254014	-0.0782122	NA	-0.364377	-0.0381435	NA	NA	NA	0.255631	NA	-0.406552	NA	NA
chr11	66366231	66366430	SLC29A2	1	4	NA	-0.361602	-0.094849	NA	-0.460345	NA	NA	NA	NA	0.233254	NA	-0.432793	NA	-0.146668
chr11	66367548	66367771	SLC29A2	0	1	NA	NA	NA	NA	NA	NA	NA	NA	NA	NA	NA	-0.107601	NA	NA
chr11	66369199	66369368	SLC29A2	1	0	NA	NA	0.044648	0.10312	NA	NA	NA	NA	0.083911	NA	NA	0.029263	NA	NA
chr22	23877171	23882458	SLC2A11	1	0	NA	NA	NA	NA	NA	NA	-0.0550122	-0.0087375	NA	NA	NA	NA	0.112521	NA
chr22	23884024	23884301	SLC2A11	2	0	NA	NA	NA	0.102841	NA	NA	NA	0.0640475	NA	0.100474	NA	NA	NA	NA
chr1	1669736	1670097	SLC35E2B	2	0	NA	0.144556	0.066781	0.04961	0.0896185	0.058466	0.14033	NA	NA	0.092739	NA	NA	NA	NA
chr21	42568438	42574817	SLC37A1	0	2	NA	NA	-0.218506	-0.107257	-0.0949582	-0.0150894	NA	-0.0409897	NA	NA	NA	-0.0780558	NA	NA
chr11	119027872	119028193	SLC37A4	1	0	0.124047	0.0525234	0.0192859	NA	NA	0.016014	0.0056603	NA	NA	0.00650805	0.0129625	NA	0.084959	NA
chr12	56230873	56231203	SLC39A5	1	0	NA	NA	NA	NA	NA	NA	NA	NA	NA	0.130173	NA	NA	NA	NA
chr12	56230900	56231203	SLC39A5	1	0	NA	NA	NA	NA	NA	NA	NA	NA	NA	0.125594	NA	NA	NA	NA
chr5	140363555	140363727	SLC4A9	1	0	NA	NA	0.228629	NA	NA	NA	NA	NA	NA	NA	NA	NA	NA	NA
chr5	140366022	140366150	SLC4A9	1	0	NA	NA	0.11569	NA	NA	NA	NA	NA	NA	NA	NA	NA	NA	NA
chr5	140366264	140367419	SLC4A9	1	0	NA	NA	0.30935	NA	NA	NA	NA	NA	NA	NA	NA	NA	NA	NA
chr3	196232524	196233062	SLC51A	2	0	NA	NA	NA	0.372142	NA	NA	NA	NA	NA	0.124614	NA	NA	NA	NA
chr2	27202880	27203232	SLC5A6	0	1	NA	NA	NA	NA	NA	NA	NA	-0.036776	NA	NA	-0.0368673	NA	NA	-0.138838
chr5	475671	476019	SLC9A3	3	0	NA	0.327876	NA	0.394624	NA	NA	NA	NA	NA	0.369972	NA	NA	NA	NA
chr5	484697	485152	SLC9A3	1	0	NA	0.103514	NA	NA	NA	NA	NA	NA	NA	NA	NA	NA	NA	NA
chr3	133948971	133951207	SLCO2A1	0	1	NA	NA	NA	NA	NA	NA	NA	-0.1189	NA	NA	NA	-0.0348681	NA	NA
chr7	151240247	151240424	SMARCD3	3	0	0.15411	0.129041	0.074404	NA	0.0329399	0.0559237	-0.042891	NA	0.0943409	0.0406238	NA	0.0623665	0.106835	0.038106
chr2	131508608	131515601	SMPD4BP	0	1	NA	NA	NA	NA	NA	NA	NA	-0.102351	NA	NA	NA	-0.0866155	NA	NA
chr2	131518708	131519049	SMPD4BP	1	0	NA	NA	NA	0.112342	NA	NA	0.0716565	-0.056914	NA	NA	NA	NA	NA	NA
chr22	31097060	31097268	SMTN	1	0	0.0440822	0.0782174	0.0617507	NA	NA	0.0257921	NA	-0.051326	NA	NA	NA	NA	0.0401709	0.117442
chr15	101285801	101286213	SNRPA1	0	1	-0.0460172	NA	0.0320764	NA	-0.031879	NA	0.0272652	-0.114414	NA	0.0105666	NA	-0.0860833	NA	-0.069627
chr17	78359183	78359749	SOCS3	0	2	NA	NA	NA	NA	NA	NA	NA	-0.325278	NA	NA	NA	-0.222558	NA	NA
chr4	185639035	185646667	SORBS2	0	2	-0.20636	NA	-0.0704966	NA	-0.0783583	-0.096473	NA	-0.0515028	NA	-0.0395769	NA	NA	-0.187771	NA
chr8	22565073	22565267	SORBS3	1	0	NA	NA	NA	NA	0.0866544	0.0051605	NA	NA	NA	NA	NA	0.12649	NA	NA
chr19	51704480	51705089	SPACA6	1	0	NA	NA	NA	NA	NA	NA	NA	NA	NA	NA	NA	NA	NA	0.117366
chr20	35617586	35617778	SPAG4	1	0	NA	NA	NA	NA	NA	NA	NA	NA	NA	0.209778	NA	0.063207	NA	NA
chr20	35618475	35618611	SPAG4	2	0	NA	NA	NA	NA	NA	NA	NA	NA	NA	0.156757	NA	NA	NA	0.157326
chr17	28578292	28578372	SPAG5	0	1	NA	NA	NA	NA	NA	NA	NA	-0.106601	NA	NA	NA	NA	NA	NA
chr17	50551679	50551968	SPATA20	1	0	0.0579643	0.0833536	NA	0.0140624	NA	NA	0.0218233	NA	0.0562498	0.0324806	NA	NA	0.093065	0.121266
chr1	31791252	31792214	SPOCD1	1	0	NA	NA	NA	NA	-0.0015155	NA	NA	NA	NA	NA	NA	0.109957	NA	NA
chr12	6872997	6873245	SPSB2	3	0	NA	NA	0.10846	0.0556555	0.0924715	NA	-0.091235	NA	NA	0.13699	NA	0.169809	NA	NA
chr6	43178485	43178805	SRF	0	1	NA	NA	NA	-0.00244905	NA	0.0166638	-0.118431	-0.0371885	NA	NA	NA	-0.00828845	NA	NA
chr7	100887859	100888053	SRRT	0	1	NA	0.0260749	NA	NA	NA	NA	-0.0092364	-0.0343305	NA	NA	NA	NA	-0.105596	NA
chr7	100887859	100888041	SRRT	0	1	NA	NA	NA	NA	NA	NA	-0.0092364	-0.0343305	NA	NA	NA	NA	-0.101537	NA
chr1	23975080	23977910	SRSF10	0	5	-0.163866	NA	0.091672	-0.103153	-0.112059	NA	-0.0121755	-0.158516	NA	-0.0580285	NA	-0.188393	NA	NA
chr1	23977453	23977910	SRSF10	0	1	NA	NA	NA	NA	NA	NA	NA	-0.181951	NA	NA	NA	NA	NA	NA
chr20	43459420	43459770	SRSF6	1	0	NA	NA	0.153561	0.0454971	-0.046717	0.0823244	NA	-0.049314	0.0283923	0.0463667	NA	-0.0591955	NA	NA
chr19	18433932	18434216	SSBP4	1	0	NA	0.124089	0.0386476	0.0413517	0.038678	NA	NA	NA	0.0553548	0.0364676	NA	0.068306	0.0627269	0.0893714
chrX	153794585	153794673	SSR4	2	0	NA	NA	NA	NA	0.189139	0.0763135	NA	0.1086	NA	NA	0.0629295	NA	NA	NA
chr3	52510235	52510348	STAB1	0	1	NA	NA	NA	NA	NA	NA	NA	-0.105946	NA	NA	NA	NA	NA	NA
chr3	52512958	52513129	STAB1	0	1	NA	NA	NA	NA	NA	NA	NA	-0.13359	NA	NA	NA	NA	-0.0748972	NA
chr3	52516768	52516983	STAB1	1	0	NA	0.139376	NA	NA	NA	NA	NA	-0.092014	NA	NA	NA	NA	-0.0792635	NA
chr2	191031080	191031449	STAT4	0	1	NA	NA	NA	NA	NA	NA	NA	NA	NA	NA	NA	-0.125475	NA	NA
chr12	57105599	57106190	STAT6	1	0	NA	0.0730266	0.0250954	0.0287373	0.0439637	0.0203924	0.0283796	NA	NA	0.0321643	NA	0.0148667	0.0797082	0.197178
chr4	26858347	26858612	STIM2	1	0	NA	NA	0.173935	NA	NA	NA	-0.047466	NA	NA	NA	NA	NA	NA	NA
chr2	218692293	218692582	STK36	4	0	NA	NA	0.178203	NA	NA	0.0513705	0.20168	NA	NA	0.155945	NA	0.074369	0.152835	NA
chr2	218696601	218697038	STK36	1	0	NA	NA	NA	0.0735188	NA	NA	0.086309	-0.027877	NA	0.0944215	NA	0.163224	NA	NA
chr10	103917656	103918099	STN1	0	4	NA	NA	-0.123097	-0.072544	-0.136909	-0.0643895	-0.0203795	-0.091553	NA	-0.0812165	NA	-0.229309	NA	-0.15595
chr2	108294354	108300795	SULT1C2	1	0	NA	NA	0.120646	NA	NA	NA	NA	NA	NA	NA	NA	NA	NA	NA
chr2	108294354	108300899	SULT1C2	1	0	NA	NA	0.0934422	NA	NA	NA	NA	NA	NA	0.102279	NA	NA	NA	NA
chr2	108298661	108300899	SULT1C2	1	0	NA	NA	0.236824	NA	NA	NA	NA	NA	NA	NA	NA	NA	NA	NA
chr7	849603	849922	SUN1	0	2	NA	0.0470911	NA	NA	-0.048369	NA	0.008455	-0.115839	NA	0.0300595	NA	-0.105463	NA	NA
chr10	14899685	14901132	SUV39H2	0	1	NA	NA	NA	NA	NA	NA	0.0828	-0.041397	NA	NA	NA	-0.12246	NA	NA
chr11	1837090	1837191	SYT8	1	0	NA	NA	NA	NA	NA	NA	NA	NA	NA	NA	NA	0.112284	NA	NA
chr1	27350485	27350793	SYTL1	1	0	NA	0.144816	NA	NA	0.0658533	NA	-0.0198961	NA	0.0570155	NA	NA	0.0589858	NA	NA
chrX	100678599	100679312	SYTL4	1	0	NA	0.182559	NA	NA	NA	NA	0.0574427	-0.09565	NA	NA	NA	NA	NA	NA
chr1	43433190	43434385	SZT2	1	0	NA	NA	NA	NA	NA	NA	0.066497	NA	NA	NA	NA	NA	0.103937	NA
chr16	84180344	84181042	TAF1C	1	0	NA	NA	0.1103	0.047173	NA	0.052736	0.095321	-0.055508	NA	0.075097	NA	NA	0.0755485	NA
chr16	84181463	84181591	TAF1C	5	0	NA	0.179614	0.1442	0.154279	NA	0.054371	0.0298895	-0.05554	NA	0.119824	NA	NA	0.064066	0.101853
chr16	84182058	84182201	TAF1C	1	0	0.114106	NA	NA	NA	NA	NA	NA	NA	NA	NA	NA	NA	0.074784	NA
chr11	67406017	67406626	TBC1D10C	2	0	NA	NA	NA	NA	0.152208	NA	0.00406	NA	NA	NA	NA	0.140616	NA	NA
chr16	2498396	2499356	TBC1D24	2	0	NA	NA	NA	0.403602	NA	NA	NA	NA	NA	0.310193	NA	NA	NA	NA
chr16	2499420	2499834	TBC1D24	2	0	NA	NA	NA	0.421265	NA	NA	NA	NA	NA	0.314783	NA	NA	NA	NA
chr16	2499930	2500267	TBC1D24	2	0	NA	NA	NA	0.353577	NA	NA	NA	NA	NA	0.307977	NA	NA	NA	NA
chr12	110641627	110642248	TCTN1	0	1	NA	NA	NA	NA	NA	NA	NA	-0.10192	NA	NA	NA	NA	NA	NA
chr14	105497443	105497797	TEDC1	0	1	NA	NA	NA	NA	NA	NA	NA	-0.172182	NA	NA	NA	-0.0843889	NA	NA
chr14	20378853	20378980	TEP1	0	1	NA	NA	NA	NA	NA	NA	NA	-0.116805	NA	NA	NA	NA	NA	NA
chr14	20403448	20403722	TEP1	1	0	NA	NA	NA	NA	NA	NA	NA	NA	NA	NA	NA	NA	0.116558	NA
chr17	81238159	81238513	TEPSIN	1	0	NA	NA	NA	NA	NA	NA	NA	NA	NA	NA	NA	NA	0.192605	NA
chr9	100310379	100320264	TEX10	0	1	NA	NA	NA	NA	NA	NA	NA	NA	NA	NA	NA	NA	-0.193394	NA
chr22	21000787	21001255	THAP7	0	5	-0.116853	-0.074341	-0.098878	-0.080143	-0.112566	-0.078348	-0.075669	-0.114332	NA	-0.0357615	NA	-0.107831	NA	-0.14895
chr22	21001411	21001831	THAP7	0	1	-0.058862	NA	NA	NA	NA	-0.035135	NA	NA	NA	NA	NA	-0.073575	NA	-0.138772
chr1	155197213	155197462	THBS3	1	0	0.0304984	NA	NA	NA	NA	NA	NA	-0.0313658	NA	NA	NA	NA	0.108506	0.0418729
chr1	155202960	155203085	THBS3	0	1	NA	NA	NA	NA	-0.169477	NA	NA	NA	NA	NA	NA	NA	NA	NA
chr1	155206406	155208905	THBS3	1	0	NA	NA	NA	NA	NA	NA	NA	NA	NA	NA	NA	NA	0.116125	NA
chr1	155206406	155207797	THBS3	1	0	NA	NA	NA	NA	NA	NA	NA	NA	NA	NA	NA	NA	0.121945	NA
chr2	88170456	88173138	THNSL2	3	0	NA	NA	NA	0.156756	NA	0.125122	-0.05251	0.089559	NA	NA	0.140859	0.045038	NA	NA
chr18	225139	225336	THOC1	0	2	NA	NA	NA	0.073221	-0.03195	NA	0.0695095	-0.128832	NA	0.054662	NA	-0.133	NA	NA
chr16	3025988	3026062	THOC6	0	1	NA	NA	-0.0208295	NA	NA	NA	-0.036021	-0.0619367	-0.102183	NA	NA	-0.0655471	NA	NA
chr2	70224629	70227734	TIA1	1	0	NA	NA	0.0481441	NA	NA	0.066943	NA	-0.047038	NA	0.025528	NA	-0.0385202	0.158114	NA
chr2	70227822	70229058	TIA1	1	1	NA	NA	NA	NA	NA	0.0699275	NA	-0.0781475	NA	NA	NA	-0.037718	0.116598	-0.100315
chr19	3019463	3019698	TLE2	1	0	0.171353	0.061619	NA	NA	NA	NA	0.034176	NA	NA	NA	NA	NA	0.090109	0.053432
chr19	3019466	3019698	TLE2	1	0	0.173012	0.0620575	NA	NA	NA	NA	0.034901	NA	NA	NA	NA	NA	0.090109	0.062823
chr1	61681350	61683416	TM2D1	1	0	NA	NA	0.127298	0.028967	NA	0.028618	-0.0136215	NA	NA	0.02223	0.0183571	-0.044434	NA	NA
chr11	65112711	65112810	TM7SF2	0	1	NA	NA	-0.103343	NA	NA	NA	NA	NA	NA	0.0891245	NA	NA	NA	NA
chr17	78138732	78139161	TMC8	0	2	NA	NA	NA	NA	NA	NA	-0.101521	-0.145101	NA	NA	NA	NA	NA	NA
chr17	78139240	78140833	TMC8	0	1	NA	NA	NA	NA	NA	NA	-0.164113	NA	NA	NA	NA	NA	NA	NA
chr4	948154	948410	TMEM175	1	0	NA	NA	NA	NA	NA	NA	NA	NA	NA	NA	NA	0.135652	NA	NA
chr16	8796590	8797611	TMEM186	0	2	NA	NA	NA	-0.0559385	-0.111783	NA	-0.04999	-0.076532	NA	-0.0639145	NA	-0.194626	NA	NA
chr1	32222018	32222306	TMEM234	1	0	NA	NA	0.124974	NA	0.059281	NA	NA	NA	NA	NA	NA	NA	NA	NA
chr3	119434882	119436790	TMEM39A	0	2	NA	NA	NA	NA	-0.161374	NA	NA	-0.0202117	NA	NA	NA	-0.104091	-0.053054	NA
chr3	119436978	119437754	TMEM39A	0	2	NA	NA	NA	NA	-0.126512	-0.0110758	NA	-0.0222209	NA	0.0194537	NA	-0.104783	-0.044156	NA
chr1	225867163	225867887	TMEM63A	0	1	NA	NA	NA	NA	NA	NA	0.02056	-0.0502115	NA	0.0240696	NA	NA	-0.105264	-0.075052
chr11	698888	700141	TMEM80	1	0	0.0459115	0.0331607	0.0358937	0.0417903	0.040758	0.0173422	NA	0.0328085	NA	0.0378244	NA	0.0479035	0.136021	NA
chr11	700707	702944	TMEM80	2	0	0.0439594	0.0820433	0.0397433	0.0524818	0.0602161	0.0203246	0.0163426	0.0244184	NA	0.0412775	NA	0.0440783	0.10906	0.100805
chr19	55228437	55228690	TMEM86B	1	0	NA	NA	NA	NA	NA	NA	NA	NA	NA	NA	0.10962	NA	NA	NA
chr17	75493102	75493490	TMEM94	1	0	NA	0.100024	0.0160455	0.0297944	NA	NA	0.0256031	NA	NA	0.0463762	NA	NA	0.0580546	NA
chr1	6461762	6461993	TNFRSF25	1	0	NA	0.0251138	NA	NA	NA	NA	NA	0.126043	NA	NA	NA	NA	-0.0426235	NA
chr1	6462666	6462862	TNFRSF25	1	0	NA	NA	NA	NA	NA	NA	NA	0.136399	NA	NA	NA	NA	NA	NA
chr1	6463127	6464374	TNFRSF25	1	0	NA	0.262629	NA	NA	NA	NA	NA	NA	NA	NA	NA	NA	NA	NA
chr20	63697522	63698279	TNFRSF6B	0	1	-0.117938	NA	NA	NA	-0.0823495	NA	NA	NA	NA	NA	NA	-0.057484	NA	NA
chr3	171063964	171066186	TNIK	1	2	NA	NA	NA	NA	NA	NA	0.118555	-0.100423	NA	NA	NA	NA	-0.118178	NA
chr17	7383089	7383249	TNK1	1	0	NA	0.117092	NA	NA	NA	NA	NA	NA	NA	NA	NA	NA	NA	NA
chr3	195879175	195882050	TNK2	0	1	NA	-0.147213	NA	NA	NA	NA	NA	NA	NA	NA	NA	-0.0113614	NA	NA
chr3	195883309	195884811	TNK2	0	1	NA	-0.2698	NA	NA	NA	NA	NA	-0.00909015	NA	NA	NA	NA	NA	NA
chr20	45824127	45824291	TNNC2	2	0	NA	0.231077	NA	NA	0.24476	NA	NA	NA	NA	NA	NA	NA	NA	NA
chr8	144433759	144433977	TONSL	0	1	NA	NA	NA	NA	NA	NA	-0.112391	NA	NA	NA	NA	NA	NA	NA
chr8	144436920	144437026	TONSL	0	1	NA	NA	NA	NA	NA	NA	-0.0496495	NA	-0.165791	NA	NA	NA	NA	NA
chr8	144440870	144440965	TONSL	0	2	NA	0.074234	NA	NA	NA	NA	NA	NA	-0.121428	NA	NA	-0.228472	NA	NA
chr8	144442412	144442676	TONSL	1	0	NA	0.152248	NA	NA	NA	NA	NA	NA	NA	NA	NA	0.037087	NA	NA
chr22	50197995	50198074	TRABD	0	1	NA	0.073876	NA	NA	NA	NA	NA	-0.109488	NA	0.0150116	NA	-0.077615	NA	NA
chr1	209777487	209778110	TRAF3IP3	1	0	NA	NA	NA	NA	NA	NA	NA	NA	0.127024	NA	NA	0.0490774	NA	NA
chr1	211365468	211369451	TRAF5	0	1	NA	NA	NA	NA	NA	0.068325	NA	-0.109996	NA	NA	NA	NA	NA	NA
chr17	56895604	56895925	TRIM25	1	0	NA	0.0816638	NA	NA	0.093524	NA	0.027621	0.042559	NA	NA	NA	-0.0620165	0.133402	NA
chr6	30104167	30105167	TRIM31	1	0	NA	0.155149	NA	NA	NA	NA	NA	NA	NA	NA	NA	NA	NA	NA
chr19	13105396	13105486	TRMT1	1	0	NA	0.106095	NA	NA	NA	NA	NA	NA	NA	NA	NA	NA	NA	NA
chr9	37776405	37777627	TRMT10B	0	1	NA	NA	NA	NA	NA	NA	NA	NA	NA	NA	NA	NA	-0.169465	NA
chr9	37776405	37777600	TRMT10B	1	1	NA	NA	0.122371	NA	NA	0.0472125	-0.007588	NA	NA	-0.0350575	NA	-0.0583	-0.112353	NA
chr22	46353867	46355443	TRMU	0	1	NA	NA	0.0357777	NA	NA	NA	NA	-0.0563885	NA	NA	NA	NA	NA	-0.135563
chr22	46356072	46356841	TRMU	0	1	NA	NA	NA	NA	NA	NA	NA	-0.056333	NA	NA	NA	NA	NA	-0.107454
chr11	64224970	64225498	TRPT1	1	0	0.100122	0.074523	NA	0.0294629	NA	0.0277017	0.021876	NA	0.0320349	0.0280729	NA	NA	0.0892087	NA
chr17	75521510	75521704	TSEN54	0	4	NA	NA	NA	-0.1994	-0.0763405	NA	-0.043201	-0.053347	-0.057082	-0.281444	-0.110765	-0.182223	NA	NA
chr17	75523335	75523662	TSEN54	0	1	NA	NA	NA	-0.0680639	NA	NA	-0.115293	-0.046225	NA	-0.052975	NA	NA	NA	NA
chr8	142274863	142279859	TSNARE1	1	0	NA	NA	0.116073	NA	NA	NA	-0.0396775	NA	NA	0.046406	NA	NA	0.051899	NA
chr17	58319294	58320108	TSPOAP1	2	0	NA	NA	NA	0.142701	NA	0.136933	0.0390055	NA	NA	NA	NA	NA	NA	NA
chr2	19897126	19897868	TTC32	2	0	NA	NA	0.177802	0.0992715	NA	0.0264945	0.117876	0.0883755	NA	NA	NA	NA	NA	NA
chr2	19898035	19901705	TTC32	1	0	NA	NA	0.100081	0.0932193	NA	0.016709	0.038399	NA	NA	0.04618	NA	NA	NA	NA
chr11	8098875	8100502	TUB	0	1	NA	NA	NA	NA	NA	NA	0.0619835	-0.2139	NA	NA	NA	NA	NA	NA
chr11	8100997	8101485	TUB	0	1	NA	NA	NA	NA	NA	0.0862255	NA	-0.120788	NA	0.048837	NA	NA	NA	NA
chr17	42660707	42662972	TUBG2	2	0	0.105423	NA	NA	0.0299924	0.0919705	0.033807	0.0095422	0.05345	NA	0.0478137	NA	0.05152	0.208566	NA
chr17	42663052	42663376	TUBG2	1	0	NA	NA	NA	0.0373498	0.0535184	NA	NA	0.0267426	NA	0.0381505	NA	0.0423079	0.198018	NA
chr22	50218117	50218188	TUBGCP6	1	0	NA	0.158197	NA	NA	NA	NA	NA	-0.064013	0.054276	0.0891385	NA	NA	NA	NA
chr19	10353646	10354041	TYK2	1	0	NA	NA	0.238156	NA	NA	NA	NA	-0.0717955	NA	0.0607165	-0.03937	NA	NA	NA
chr19	35744421	35744490	U2AF1L4	2	1	NA	0.222305	NA	NA	NA	NA	0.057989	-0.109398	NA	0.130839	NA	NA	NA	NA
chr19	35744540	35744625	U2AF1L4	2	1	NA	0.245785	NA	NA	NA	NA	0.069973	-0.141992	NA	0.137148	NA	NA	NA	NA
chr9	137079449	137080001	UAP1L1	1	0	NA	NA	NA	NA	NA	NA	NA	-0.0630852	NA	0.121649	NA	-0.057951	NA	NA
chr3	49810183	49810262	UBA7	1	1	NA	0.105507	NA	NA	0.0656805	NA	-0.073696	-0.118635	NA	NA	NA	NA	NA	NA
chr3	49810428	49810516	UBA7	1	1	NA	0.142697	NA	NA	NA	NA	NA	-0.104427	NA	NA	NA	NA	NA	NA
chr3	49811091	49811272	UBA7	1	0	NA	0.11749	NA	NA	0.052057	NA	NA	-0.061463	NA	NA	NA	NA	0.095134	NA
chr3	49811455	49811869	UBA7	1	0	NA	0.107699	0.0321935	NA	0.093618	NA	NA	-0.046571	NA	NA	NA	NA	NA	NA
chr16	4868903	4870211	UBN1	0	1	NA	NA	NA	NA	NA	NA	0.0900825	NA	NA	-0.0371231	NA	-0.165589	NA	NA
chr16	4870972	4871154	UBN1	0	1	NA	NA	NA	NA	NA	NA	NA	NA	NA	-0.0785659	NA	-0.113158	NA	NA
chr16	4872934	4873030	UBN1	0	2	NA	NA	NA	NA	-0.126955	NA	NA	-0.0332906	-0.145159	-0.052161	NA	-0.0976359	NA	NA
chr16	4873073	4874210	UBN1	0	1	NA	NA	NA	NA	-0.11591	NA	0.0837273	NA	NA	NA	NA	NA	NA	NA
chr16	4877111	4877384	UBN1	0	1	NA	NA	NA	NA	-0.055473	NA	0.0271638	-0.0285297	-0.114015	NA	NA	-0.0602222	-0.0604696	NA
chr16	4877474	4880082	UBN1	0	1	NA	NA	NA	NA	-0.0551826	NA	0.0170193	-0.036793	-0.130323	-0.00647855	NA	-0.0675733	NA	NA
chr1	26284482	26285463	UBXN11	2	1	NA	0.129713	NA	NA	NA	NA	0.019258	-0.133869	NA	0.09726	NA	NA	0.108281	NA
chr5	176969291	176969600	UIMC1	1	0	NA	NA	NA	NA	NA	0.007178	NA	NA	0.125331	0.037483	NA	NA	NA	NA
chrX	119851601	119851766	UPF3B	1	0	NA	NA	NA	NA	NA	NA	0.167949	NA	NA	NA	NA	NA	NA	NA
chr1	161164612	161164834	USP21	3	0	NA	0.113931	0.149478	NA	NA	NA	-0.030688	-0.0367715	0.0591895	NA	NA	0.085171	0.137068	NA
chr4	1380230	1380879	UVSSA	1	0	NA	NA	NA	NA	NA	NA	NA	NA	NA	0.271086	NA	NA	NA	NA
chr8	42401836	42405432	VDAC3	1	0	NA	NA	NA	0.035879	NA	NA	0.079161	-0.06936	NA	0.0411076	NA	NA	0.171815	NA
chr6	43777665	43778459	VEGFA	1	0	0.073804	0.0509116	0.0496335	0.0584863	0.0393741	0.0196313	0.0069205	NA	0.00090785	0.0572714	0.0178267	0.0706448	NA	0.135328
chr10	114290365	114291217	VWA2	1	0	NA	NA	NA	NA	NA	NA	NA	-0.0679994	NA	NA	NA	0.144972	NA	NA
chr2	74458671	74458831	WBP1	0	1	0.0642215	NA	NA	NA	NA	NA	-0.0378693	-0.108744	NA	NA	NA	NA	NA	NA
chr13	51751415	51755357	WDFY2	1	0	NA	NA	NA	NA	NA	NA	NA	-0.071456	NA	0.117329	NA	NA	NA	NA
chr13	51755459	51756331	WDFY2	1	0	NA	NA	NA	0.106184	NA	NA	NA	NA	NA	NA	NA	NA	NA	NA
chr21	42843281	42850040	WDR4	0	3	NA	-0.114354	NA	NA	NA	NA	-0.067576	-0.052329	NA	-0.105195	NA	-0.100408	NA	NA
chr16	74909657	74909821	WDR59	1	0	NA	NA	NA	NA	NA	NA	0.012668	NA	NA	0.0395825	NA	NA	0.109533	NA
chr15	84647954	84648536	WDR73	1	0	NA	NA	0.114589	NA	NA	0.0420096	0.0218405	-0.028189	NA	NA	NA	NA	NA	NA
chr17	1732831	1733526	WDR81	1	0	0.098645	0.11593	NA	0.0560638	NA	NA	NA	NA	NA	0.0392735	NA	0.027061	0.0502365	NA
chr7	151385223	151395775	WDR86	0	1	NA	NA	NA	NA	NA	NA	-0.00988905	-0.124018	NA	NA	NA	NA	NA	NA
chr16	659011	659085	WDR90	1	0	NA	NA	NA	NA	NA	NA	NA	NA	NA	0.167999	NA	NA	NA	NA
chr9	114425024	114426210	WHRN	1	0	NA	NA	NA	NA	NA	0.0195545	0.009971	NA	NA	NA	NA	NA	0.243719	NA
chr9	93300149	93306776	WNK2	2	0	NA	NA	NA	NA	NA	0.114027	NA	-0.062425	NA	NA	NA	NA	0.149164	NA
chr8	31116528	31120242	WRN	0	1	NA	NA	NA	NA	NA	NA	NA	-0.122272	NA	NA	NA	NA	NA	NA
chr16	69931580	69931801	WWP2	1	0	NA	NA	NA	NA	NA	NA	NA	NA	NA	0.124634	NA	NA	NA	NA
chr16	69936452	69937117	WWP2	1	0	NA	NA	NA	NA	NA	NA	NA	NA	NA	0.120447	NA	NA	NA	NA
chr14	103699017	103699132	XRCC3	0	8	-0.263139	-0.125433	NA	NA	-0.32468	0.089466	NA	-0.235045	-0.108809	NA	NA	-0.502537	-0.358768	-0.384385
chr11	74843959	74844167	XRRA1	1	0	NA	NA	NA	NA	0.085365	NA	NA	0.072996	NA	NA	NA	NA	0.137446	NA
chr17	7292059	7293474	YBX2	0	1	NA	NA	NA	NA	NA	NA	NA	-0.100047	NA	NA	NA	NA	NA	NA
chr11	10855118	10856143	ZBED5	1	0	NA	NA	NA	NA	NA	0.0247015	0.0429195	NA	NA	0.034218	NA	NA	0.112344	NA
chr14	64523402	64531860	ZBTB1	1	0	NA	NA	NA	NA	NA	0.10879	NA	NA	NA	NA	NA	-0.0028965	NA	NA
chr1	22501684	22502298	ZBTB40	0	1	NA	NA	NA	NA	NA	NA	NA	NA	NA	NA	NA	-0.144279	NA	NA
chr1	37475939	37480289	ZC3H12A	1	1	0.0563367	NA	NA	NA	0.0806241	0.0164087	NA	0.115736	NA	-0.135419	NA	NA	NA	NA
chr1	37480429	37481600	ZC3H12A	1	1	NA	NA	NA	NA	0.0883802	0.0395385	NA	0.100103	NA	-0.11538	NA	NA	NA	NA
chr1	37481835	37482433	ZC3H12A	0	1	NA	NA	NA	NA	0.065537	NA	NA	NA	NA	-0.118185	NA	NA	NA	NA
chr18	62575550	62576511	ZCCHC2	1	0	0.0680425	NA	0.116642	0.0684185	NA	NA	0.081867	0.0181835	NA	NA	NA	NA	NA	NA
chr9	14674385	14680032	ZDHHC21	0	1	NA	NA	NA	NA	NA	NA	NA	-0.11987	NA	NA	NA	NA	NA	NA
chr22	20139892	20140114	ZDHHC8	1	0	NA	0.0933145	0.056055	NA	NA	NA	NA	NA	NA	NA	NA	NA	0.095791	0.117429
chr22	20140217	20140616	ZDHHC8	1	0	NA	0.091956	NA	NA	NA	NA	0.0077057	0.0275166	NA	NA	NA	NA	0.110077	0.0846296
chr22	20143756	20145228	ZDHHC8	0	5	-0.124588	-0.0928777	0.074783	-0.02716	-0.182132	-0.0724505	NA	-0.126507	-0.0510238	-0.038022	-0.0650025	-0.262931	-0.25535	-0.0916729
chr19	39406928	39407742	ZFP36	2	0	0.13521	NA	NA	NA	0.0601285	0.0347035	NA	0.0174003	0.0217536	0.0236932	0.0351951	NA	0.0432443	0.102375
chr15	40814070	40814147	ZFYVE19	1	0	0.103147	NA	-0.0633271	NA	0.0461275	0.0342708	-0.0278397	NA	NA	NA	0.0558395	0.0412215	0.050831	0.0899245
chr20	63733739	63734644	ZGPAT	0	2	NA	NA	-0.0392337	-0.114901	NA	NA	-0.0042541	-0.0379255	NA	-0.120911	NA	-0.0382956	0.0202902	NA
chr8	144754803	144755404	ZNF251	3	0	NA	0.139166	0.166762	NA	NA	0.0984095	NA	NA	NA	NA	NA	NA	0.100644	NA
chr19	58207202	58209960	ZNF274	1	0	NA	NA	NA	NA	NA	NA	0.008593	-0.045699	NA	NA	NA	NA	0.105776	NA
chr19	58210073	58211559	ZNF274	1	0	NA	NA	0.0400689	NA	NA	NA	0.0221657	-0.0435255	NA	0.0348089	NA	NA	0.154147	NA
chr16	89723183	89723259	ZNF276	0	1	NA	NA	-0.091119	NA	NA	NA	0.056052	NA	NA	NA	NA	-0.115372	NA	NA
chr19	43837179	43846938	ZNF283	0	1	NA	NA	NA	NA	NA	NA	NA	-0.108298	NA	NA	NA	NA	NA	NA
chr19	34682897	34683154	ZNF302	1	0	NA	NA	NA	NA	NA	NA	0.119886	NA	NA	0.0472471	NA	NA	NA	NA
chr19	34682897	34683151	ZNF302	1	0	NA	NA	NA	NA	NA	NA	0.123629	NA	NA	0.0394144	NA	NA	NA	NA
chr19	34683238	34684251	ZNF302	1	0	0.104572	NA	NA	NA	NA	NA	0.0832156	NA	NA	0.0179607	NA	0.036758	0.081706	NA
chr19	52891346	52893778	ZNF320	1	0	NA	NA	NA	NA	NA	NA	NA	NA	NA	NA	NA	NA	0.122383	NA
chr20	45971460	45972121	ZNF335	1	0	NA	NA	0.287404	NA	NA	NA	NA	NA	NA	NA	NA	NA	NA	NA
chr20	25686466	25696758	ZNF337	1	1	NA	NA	NA	NA	NA	0.119767	NA	-0.115765	NA	NA	NA	NA	NA	NA
chr8	28361182	28386003	ZNF395	1	0	NA	NA	NA	NA	NA	NA	NA	NA	NA	0.100121	NA	NA	NA	NA
chr16	2002732	2002990	ZNF598	1	0	NA	NA	0.11923	NA	NA	NA	NA	NA	NA	NA	NA	NA	NA	NA
chr7	99561973	99562367	ZNF655	0	1	NA	0.0716545	NA	NA	-0.0485555	0.049568	NA	-0.125801	NA	0.032108	NA	NA	NA	NA
chr7	99571379	99571687	ZNF655	1	0	NA	NA	0.134383	NA	NA	NA	NA	NA	NA	0.0644775	NA	NA	NA	NA
chr7	99571792	99572244	ZNF655	3	0	NA	NA	0.109037	NA	NA	0.046956	0.039438	0.0428645	NA	0.0375275	NA	0.118629	0.14688	NA
chr3	75730618	75732059	ZNF717	1	0	NA	NA	NA	0.109291	NA	NA	NA	0.057373	NA	NA	NA	NA	NA	NA
chr16	30557846	30557986	ZNF764	2	0	NA	NA	-0.0757395	NA	NA	NA	0.118503	NA	NA	NA	NA	0.111747	NA	NA
chr7	127371814	127373341	ZNF800	5	0	0.167679	0.0487045	NA	0.042526	0.148003	NA	0.097284	0.112504	0.136736	0.0411185	NA	0.0508395	NA	0.139469
chr19	52093971	52095574	ZNF841	1	0	NA	NA	NA	NA	NA	0.095793	NA	NA	NA	NA	NA	NA	0.180396	NA
chr7	149838635	149844624	ZNF862	1	0	NA	NA	NA	NA	NA	NA	NA	NA	NA	NA	NA	NA	0.112023	NA
chr19	13808984	13809069	ZSWIM4	0	2	NA	-0.104014	NA	NA	NA	-0.218487	NA	NA	NA	0	NA	NA	NA	NA
chr3	126441946	126459652	ZXDC	1	2	NA	NA	0.186083	0.0737855	-0.080602	NA	NA	-0.120988	-0.0333994	NA	NA	-0.124864	NA	-0.037043
chr3	126459737	126461534	ZXDC	3	2	NA	NA	0.299716	0.159323	NA	NA	0.119601	-0.100213	-0.035016	NA	NA	-0.128103	-0.0723985	NA

## Sheet: Table S3
Table S3. Statistics of survival associated IR events.
Note: Prognostic IR denotes IR events that are associated with survival. Prognostic expression denotes genes whose expression is associated with survival.
Cancer	#Patients	#Prevelant IR events	#Favorable prognostic IR	#Adverse prognostic IR	#Total prognostic IR	%prognostic IR in prevelant IR	#Favorable prognostic expression	#Adverse prognostic expression	#Total prognostic expression
LAML	151	43332	13225	34	13259	0.305986	1144	1381	2525
KIRC	518	6987	114	4095	4209	0.602404	4695	2639	7334
BLCA	401	4554	1284	50	1334	0.292929	1844	1454	3298
LGG	510	5589	589	589	1178	0.210771	4208	4619	8827
PRAD	495	3063	30	1012	1042	0.340189	1083	2182	3265
ESCA	155	15743	206	654	860	0.0546275	468	612	1080
BRCA	1054	3920	730	61	791	0.201786	1497	1107	2604
STAD	348	11294	225	529	754	0.0667611	1057	1606	2663
MESO	85	7932	490	126	616	0.0776601	1384	697	2081
PAAD	177	4968	506	97	603	0.121377	2723	2002	4725
LUAD	450	5351	450	88	538	0.100542	1687	1579	3266
COAD	450	2750	14	468	482	0.175273	773	1726	2499
KIRP	286	5359	355	112	467	0.0871431	1871	2233	4104
CESC	304	4494	190	150	340	0.0756564	1098	1669	2767
OV	364	3370	83	251	334	0.0991098	1055	3701	4756
ACC	79	3057	186	124	310	0.101407	1906	2877	4783
LIHC	370	1830	114	193	307	0.16776	861	4079	4940
LUSC	436	5206	238	64	302	0.05801	478	1389	1867
GBM	153	5610	150	134	284	0.0506239	557	1508	2065
SARC	254	2658	113	167	280	0.105342	1493	1653	3146
HNSC	470	1837	210	26	236	0.12847	1122	902	2024
SKCM	101	3667	66	166	232	0.063267	580	2861	3441
UCEC	526	1811	59	162	221	0.122032	1986	2076	4062
TGCT	150	4430	196	18	214	0.048307	708	415	1123
THCA	475	4030	46	154	200	0.0496278	760	912	1672
UCS	55	3518	103	89	192	0.0545765	471	475	946
READ	164	2834	84	103	187	0.0659845	1244	556	1800
CHOL	35	5201	52	100	152	0.0292251	762	283	1045
THYM	117	3968	86	33	119	0.0299899	1562	605	2167
UVM	79	2015	58	28	86	0.0426799	1010	4228	5238
KICH	65	2709	23	17	40	0.0147656	248	220	468
DLBC	48	3091	3	36	39	0.0126173	233	164	397
PCPG	177	3699	0	0	0	0	0	3	3

## Sheet: Table S4
Table S4. Prognositc introns in at least one cancer.
Note: The signed P value of univariate cox regression where patients were divided into two groups based on the median IRratio is presented for each cancer, and positive and negative signs indicate adverse and favorable prognosis respectively. NA represents that the specifc intron is not commonly retained in a certain cancer. The last four columns calculate the number of cancers in which a specifi…
Intron position	Gene	ACC	BLCA	BRCA	CESC	CHOL	COAD	DLBC	ESCA	GBM	HNSC	KICH	KIRC	KIRP	LAML	LGG	LIHC	LUAD	LUSC	MESO	OV	PAAD	PCPG	PRAD	READ	SARC	SKCM	STAD	TGCT	THCA	THYM	UCEC	UCS	UVM	#Cancers showing favorable prognositc	#Cancers showing adverse prognositc	#Cancers showing prognosis	#Cancer prevalent with the IR
chr7:138579532-138580561	TRIM24	NA	NA	NA	NA	NA	NA	NA	NA	NA	NA	NA	NA	NA	-0.024329	NA	NA	NA	NA	NA	NA	NA	NA	NA	NA	NA	NA	NA	NA	NA	NA	NA	NA	NA	1	0	1	1
chr2:233163903-233164306	INPP5D	NA	NA	NA	NA	NA	NA	NA	NA	NA	NA	NA	NA	NA	-0.0384048	NA	NA	NA	NA	NA	NA	NA	NA	NA	NA	NA	NA	NA	NA	NA	NA	NA	NA	NA	1	0	1	1
chr4:2831679-2831922	SH3BP2	NA	NA	NA	NA	NA	NA	NA	NA	NA	NA	NA	NA	NA	-0.00535498	NA	NA	NA	NA	NA	NA	NA	NA	NA	NA	NA	NA	NA	NA	NA	NA	NA	NA	NA	1	0	1	1
chr11:119677857-119678414	NECTIN1	NA	-0.0134985	NA	NA	NA	NA	NA	NA	NA	NA	NA	NA	NA	NA	NA	NA	NA	NA	NA	NA	NA	NA	NA	NA	NA	NA	NA	NA	NA	NA	NA	NA	NA	1	0	1	1
chr1:37987678-37987783	SF3A3	NA	NA	NA	NA	NA	NA	NA	NA	NA	NA	NA	NA	NA	-0.0200947	NA	NA	NA	NA	NA	NA	NA	NA	NA	NA	NA	NA	NA	NA	NA	NA	NA	NA	NA	1	0	1	1
chr15:75354277-75354430	NEIL1	-0.280064	-0.0817174	-0.0442969	0.199947	-0.675015	0.157241	0.242067	0.18398	0.32314	NA	-0.250492	0.00452719	0.730825	NA	0.238314	0.284973	0.544451	-0.0265918	0.499369	-0.582407	-0.0463868	0.634349	0.00070509	0.189305	-0.482519	0.0604454	-0.67616	-0.442778	0.0159225	0.466894	-0.838697	0.223345	-0.126101	3	3	6	31
chr22:50447609-50448232	SBF1	NA	NA	NA	NA	NA	NA	NA	NA	NA	NA	NA	NA	NA	-0.00102063	NA	NA	NA	NA	NA	NA	NA	NA	NA	NA	NA	NA	NA	NA	NA	NA	NA	NA	NA	1	0	1	1
chr12:50505240-50625975	DIP2B	NA	NA	NA	NA	NA	NA	NA	NA	NA	NA	NA	NA	NA	-0.00067651	NA	NA	NA	NA	NA	NA	NA	NA	NA	NA	NA	NA	NA	NA	NA	NA	NA	NA	NA	1	0	1	1
chr3:25628952-25629034	TOP2B	NA	NA	NA	NA	NA	NA	NA	NA	NA	NA	NA	NA	NA	-0.0465146	NA	NA	NA	NA	NA	NA	NA	NA	NA	NA	NA	NA	NA	NA	NA	NA	NA	NA	NA	1	0	1	1
chr1:212618234-212619357	ATF3	NA	-0.142223	-0.583825	0.122298	0.247554	-0.737181	NA	-0.611822	0.420518	-0.0516075	NA	0.00306046	0.207102	-0.0678838	-0.0312904	0.199848	-0.204135	0.082695	-0.648033	-0.0314736	0.770218	-0.999062	0.517859	-0.42224	0.244143	NA	0.186532	-0.0867064	0.366271	NA	NA	0.241896	NA	2	1	3	26
chr12:56138499-56138767	ESYT1	NA	NA	NA	NA	NA	NA	NA	NA	NA	NA	NA	NA	NA	-0.0300333	NA	NA	NA	NA	NA	NA	NA	NA	NA	NA	NA	NA	NA	NA	NA	NA	NA	NA	NA	1	0	1	1
chr14:74667377-74667464	AREL1	NA	NA	NA	NA	NA	NA	NA	0.276543	NA	NA	NA	0.15431	NA	0.0490244	NA	NA	NA	NA	NA	NA	NA	NA	NA	NA	NA	NA	NA	NA	NA	NA	NA	NA	NA	0	1	1	3
chr1:36287270-36289059	THRAP3	NA	-0.255681	NA	0.110862	-0.752119	NA	NA	0.482371	-0.518143	0.403001	NA	0.00032076	-0.061403	-0.0437041	0.334755	NA	-0.718042	-0.887101	0.276176	0.293364	0.391145	NA	0.016875	0.433201	NA	0.213558	NA	NA	-0.0516673	NA	NA	NA	0.857071	1	2	3	20
chr10:97753182-97757264	ZFYVE27	NA	NA	-0.00010519	0.445027	0.28378	0.532707	-0.33537	-0.405082	NA	NA	NA	0.0146465	0.561544	-0.52985	0.0519358	NA	-0.390953	-0.411109	NA	0.327167	0.414291	NA	NA	-0.292272	NA	0.216962	0.0892424	NA	0.67205	NA	NA	NA	-0.835959	1	1	2	19
chr15:84638477-84639507	SCAND2P	NA	NA	-0.42553	-0.0120381	0.790287	NA	NA	-0.327018	0.528331	NA	0.662928	0.00033938	0.078686	-0.664595	0.0165055	NA	NA	0.431403	0.297115	-0.0547943	0.375137	0.998674	-0.0921171	NA	-0.285332	NA	0.312564	NA	-0.177042	0.261817	NA	0.1668	NA	1	2	3	21
chr1:1341805-1342052	DVL1	0.227312	-0.522431	-0.0456333	-0.518678	0.70622	0.554654	NA	0.412078	0.214552	NA	NA	0.0171366	-0.145865	-0.11349	NA	NA	0.667816	-0.208171	-0.617853	-0.15139	0.63375	NA	NA	0.763204	NA	NA	0.546011	NA	NA	NA	NA	0.14823	NA	1	1	2	19
chr3:52696040-52696233	GLT8D1	-0.33025	-0.186566	-0.477919	-0.0970522	-0.462281	0.103104	NA	0.0826576	NA	NA	-0.648502	-0.690605	-0.0442385	0.424096	-0.018553	0.222447	-0.408583	-0.258357	0.650042	0.555594	-0.261718	-0.278143	0.177574	-0.415699	-0.683051	-0.655534	-0.742591	0.262246	-0.170587	-0.335143	0.11498	0.714459	NA	2	0	2	29
chr7:100023932-100024153	ZKSCAN1	NA	NA	NA	NA	NA	NA	NA	0.011474	NA	NA	NA	NA	NA	-0.654724	NA	NA	NA	NA	NA	-0.00156625	NA	NA	0.140793	NA	NA	NA	0.585973	-0.490359	NA	NA	NA	NA	NA	1	1	2	6
chr5:37027412-37036378	NIPBL	NA	NA	NA	NA	NA	NA	NA	NA	NA	NA	NA	NA	NA	-0.0128169	NA	NA	NA	NA	NA	NA	NA	NA	NA	NA	NA	NA	NA	NA	NA	NA	NA	NA	NA	1	0	1	1
chr7:74223783-74224017	LAT2	NA	NA	NA	NA	NA	NA	NA	NA	NA	NA	NA	NA	NA	-0.00034175	NA	NA	NA	NA	NA	NA	NA	NA	NA	NA	NA	NA	NA	NA	NA	NA	NA	NA	NA	1	0	1	1
chr15:78894904-78896982	MORF4L1	NA	NA	NA	NA	NA	NA	NA	NA	NA	NA	NA	NA	NA	-0.0014409	NA	NA	NA	NA	NA	NA	NA	NA	NA	NA	NA	NA	NA	NA	NA	NA	NA	NA	NA	1	0	1	1
chr19:2324196-2328386	LSM7	NA	NA	NA	NA	-0.322785	NA	NA	NA	NA	NA	NA	0.00899939	NA	-0.00822389	NA	NA	NA	NA	NA	NA	NA	NA	NA	NA	NA	NA	NA	NA	NA	NA	NA	NA	NA	1	1	2	3
chr7:1550198-1550304	TMEM184A	NA	NA	NA	NA	NA	NA	NA	-0.0174452	NA	NA	NA	NA	NA	NA	NA	NA	NA	NA	NA	-0.324181	NA	NA	NA	NA	NA	NA	NA	NA	NA	NA	NA	NA	NA	1	0	1	2
chr9:136430413-136431001	INPP5E	0.65476	-0.354493	NA	0.179266	0.229951	NA	NA	-0.0825855	-0.258662	NA	-0.999408	0.0956672	-0.013018	-0.896564	-0.616111	NA	NA	0.255959	-0.37349	-0.0682461	NA	NA	NA	NA	NA	NA	0.208457	-0.791672	NA	0.383856	NA	NA	NA	1	0	1	17
chr17:82716896-82718905	FN3KRP	NA	NA	NA	0.635623	0.880367	NA	NA	-0.25841	NA	NA	NA	0.0665035	-0.148871	-0.973307	NA	NA	-0.00101136	-0.0870892	NA	0.399576	NA	NA	NA	NA	NA	0.337	-0.308966	NA	NA	NA	NA	NA	NA	1	0	1	11
chr3:49109185-49110183	USP19	NA	-0.0198828	0.370682	0.252514	-0.718116	0.204341	0.0767109	-0.318987	-0.39254	-0.597209	NA	3.375e-05	0.0633396	NA	0.0950482	0.646786	-0.34784	-0.582654	0.0707861	-0.317955	-0.387792	NA	NA	-0.260523	NA	0.122625	0.0798944	NA	NA	0.152206	NA	-0.723628	NA	1	1	2	23
chr1:211304140-211312719	RCOR3	NA	NA	NA	NA	0.367822	NA	NA	-0.558276	NA	NA	NA	0.0345746	NA	-0.0178564	NA	NA	NA	NA	NA	NA	NA	NA	NA	NA	NA	NA	-0.191682	NA	NA	NA	NA	NA	NA	1	1	2	5
chr1:184708344-184710393	EDEM3	NA	NA	NA	NA	NA	NA	NA	NA	NA	NA	NA	NA	NA	-0.0163898	NA	NA	NA	NA	NA	NA	NA	NA	NA	NA	NA	NA	NA	NA	NA	NA	NA	NA	NA	1	0	1	1
chr6:31759177-31759424	MSH5	NA	-0.0707827	NA	-0.671792	-0.312637	0.768489	-0.233339	0.0759618	-0.698504	NA	NA	0.516992	0.0832383	-0.205611	-0.00011698	NA	0.275949	0.522985	-0.277705	-0.193763	0.294036	NA	NA	-0.172073	NA	-0.36841	-0.312688	-0.822677	NA	-0.0218028	NA	-0.858518	NA	2	0	2	22
chr7:100094341-100095386	MCM7	NA	NA	NA	NA	NA	NA	NA	NA	NA	NA	NA	NA	NA	-0.0365253	NA	NA	NA	NA	NA	NA	NA	NA	NA	NA	NA	NA	NA	NA	NA	NA	NA	NA	NA	1	0	1	1
chr8:144511789-144511910	RECQL4	-0.00576779	0.839232	-0.487076	NA	-0.731817	0.0343102	NA	-0.325871	-0.881645	0.755884	-0.0395862	-0.170922	-0.00723142	-0.0738085	-0.0148279	-0.0400429	0.326434	0.20341	NA	0.113294	-0.50692	-0.321254	-0.1558	-0.183102	-0.110008	-0.109182	0.173581	NA	-0.00306909	0.122307	-0.00903741	-0.0352158	-0.0223223	9	1	10	29
chr2:101790776-101823927	MAP4K4	NA	NA	NA	NA	NA	NA	NA	NA	NA	NA	NA	NA	NA	-0.0176433	NA	NA	NA	NA	NA	NA	NA	NA	NA	NA	NA	NA	NA	NA	NA	NA	NA	NA	NA	1	0	1	1
chr2:202300137-202300233	NOP58	NA	NA	NA	NA	NA	NA	NA	-0.275363	NA	NA	-0.175696	0.0929235	-0.00455535	-0.461114	NA	NA	NA	NA	NA	-0.708078	NA	-0.357869	NA	NA	NA	NA	NA	NA	NA	NA	0.259978	NA	NA	1	0	1	8
chr8:47729047-47729411	SPIDR	NA	NA	NA	NA	NA	NA	NA	-0.47386	NA	NA	NA	0.458583	NA	-0.00176124	NA	NA	NA	NA	NA	NA	NA	NA	NA	NA	NA	NA	-0.890833	NA	NA	NA	NA	NA	NA	1	0	1	4
chr14:64214470-64215285	SYNE2	NA	NA	NA	NA	-0.390546	NA	NA	NA	NA	NA	NA	0.00202367	0.0350763	NA	NA	NA	NA	NA	NA	0.0796121	-0.250378	NA	NA	NA	NA	NA	NA	-0.0642848	NA	NA	NA	NA	NA	0	2	2	6
chr5:160589696-160591058	ATP10B	NA	NA	NA	NA	NA	NA	NA	NA	NA	NA	NA	NA	NA	NA	NA	NA	NA	NA	NA	NA	NA	NA	NA	NA	NA	NA	0.0117479	NA	NA	NA	NA	NA	NA	0	1	1	1
chr11:62633514-62634820	GANAB	0.309787	-0.0187331	NA	-0.0857231	-0.267782	NA	0.420368	0.360809	NA	NA	-0.287652	0.0207497	-0.0966238	-0.287084	-0.57666	-0.112234	-0.138974	-0.282081	NA	-0.4715	-0.102626	0.137653	NA	NA	NA	0.578211	NA	-0.468468	0.436305	0.465826	0.0519917	-0.446065	0.486841	1	1	2	24
chr19:3783219-3783813	MATK	NA	NA	NA	NA	NA	NA	NA	NA	NA	NA	NA	NA	NA	-0.00051962	NA	NA	NA	NA	NA	NA	NA	NA	NA	NA	NA	NA	NA	NA	NA	NA	NA	NA	NA	1	0	1	1
chr22:37833755-37838499	ANKRD54	NA	NA	NA	NA	NA	NA	NA	0.247275	NA	NA	NA	NA	NA	-0.0104799	NA	NA	NA	NA	NA	NA	NA	NA	NA	NA	NA	NA	0.219016	NA	NA	NA	NA	NA	NA	1	0	1	3
chr1:145847719-145848111	NUDT17	NA	NA	NA	NA	NA	NA	0.489737	0.141223	-0.0414687	NA	NA	NA	NA	-0.833609	NA	NA	NA	NA	NA	0.0142138	NA	NA	NA	NA	NA	NA	NA	NA	NA	-0.682771	NA	NA	NA	1	1	2	6
chr21:33432802-33436882	TMEM50B	NA	-0.606645	-0.484256	0.601849	-0.228059	NA	-0.346913	-0.46451	0.121356	NA	NA	0.665281	0.17797	0.231294	1.59e-05	NA	0.0966509	-0.514974	0.380686	-0.237555	0.110212	NA	-0.318073	NA	0.00470172	0.352989	0.326076	0.192102	0.459471	0.206834	NA	-0.544632	NA	0	2	2	24
chr22:37645510-37646817	SH3BP1	NA	NA	NA	NA	NA	NA	NA	NA	NA	NA	NA	NA	NA	-1.8e-06	NA	NA	NA	NA	NA	NA	NA	NA	NA	NA	NA	NA	NA	NA	NA	NA	NA	NA	NA	1	0	1	1
chr1:193069634-193075819	RO60	NA	NA	NA	NA	NA	NA	NA	NA	NA	NA	NA	NA	NA	-0.0318199	NA	NA	NA	NA	NA	NA	NA	NA	NA	NA	NA	NA	NA	NA	NA	NA	NA	NA	NA	1	0	1	1
chr7:101232914-101234277	CLDN15	-0.412415	0.107872	-0.195813	-0.786635	0.800517	0.0128879	0.175772	0.714831	-0.0914124	NA	0.484375	0.00205925	-0.0562373	0.972528	0.183846	0.156791	NA	0.376302	0.0392443	-0.246778	-0.311817	0.915711	0.267406	0.483291	0.0914011	0.293227	-0.198432	-0.452071	0.498799	0.465576	NA	0.190776	0.438979	0	3	3	30
chr11:57803804-57804662	CTNND1	NA	NA	NA	NA	NA	NA	NA	NA	NA	NA	NA	NA	NA	-0.00518194	NA	NA	NA	NA	NA	NA	NA	NA	NA	NA	NA	NA	NA	NA	NA	NA	NA	NA	NA	1	0	1	1
chr2:42767677-42767859	HAAO	NA	NA	NA	NA	0.404328	0.468638	0.0854186	0.490073	NA	NA	NA	0.0379524	-0.498634	-0.331755	NA	5.55e-06	NA	NA	NA	0.178365	NA	NA	NA	-0.609032	0.222136	NA	0.0846165	0.113952	NA	-0.254573	NA	NA	NA	0	2	2	14
chr8:22408496-22409945	SLC39A14	NA	NA	NA	NA	NA	NA	NA	NA	NA	NA	NA	0.0307774	NA	NA	NA	NA	NA	NA	NA	NA	NA	NA	NA	NA	NA	NA	NA	NA	NA	NA	NA	NA	NA	0	1	1	1
chr10:118686168-118686597	CACUL1	NA	NA	NA	NA	NA	NA	NA	NA	NA	NA	NA	NA	NA	-0.0373494	NA	NA	NA	NA	NA	NA	NA	NA	NA	NA	NA	NA	NA	NA	NA	NA	NA	NA	NA	1	0	1	1
chr3:50331856-50332049	RASSF1	NA	NA	NA	NA	NA	NA	NA	NA	NA	NA	NA	NA	NA	-0.0166055	NA	NA	NA	NA	NA	NA	NA	NA	NA	NA	NA	NA	NA	NA	NA	NA	NA	NA	NA	1	0	1	1
chr19:13965546-13965625	RFX1	NA	NA	NA	NA	NA	NA	NA	NA	NA	NA	NA	NA	NA	-0.00938624	NA	NA	NA	NA	NA	NA	NA	NA	NA	NA	NA	NA	NA	NA	NA	NA	NA	NA	NA	1	0	1	1
chr6:149802369-149810615	PCMT1	NA	NA	NA	NA	NA	NA	NA	NA	NA	NA	NA	NA	NA	-0.0354495	NA	NA	NA	NA	NA	NA	NA	NA	NA	NA	NA	NA	NA	NA	NA	NA	NA	NA	NA	1	0	1	1
chr3:152459345-152462384	MBNL1	NA	NA	NA	NA	NA	NA	NA	NA	NA	NA	NA	NA	NA	-0.00440503	NA	NA	NA	NA	NA	NA	NA	NA	NA	NA	NA	NA	NA	NA	NA	NA	NA	NA	NA	1	0	1	1
chr10:79347743-79349075	PPIF	NA	NA	NA	NA	NA	NA	NA	NA	NA	NA	NA	NA	NA	-0.0368146	NA	NA	NA	NA	NA	NA	NA	NA	NA	NA	NA	NA	NA	NA	NA	NA	NA	NA	NA	1	0	1	1
chr22:36763013-36763918	IFT27	NA	NA	0.444934	NA	NA	NA	NA	0.469359	-0.26916	NA	NA	0.14066	0.352364	-0.0188316	-0.0137702	NA	-0.2239	NA	NA	0.0458811	NA	NA	NA	NA	NA	0.483614	0.0852011	-0.600148	NA	NA	NA	NA	-0.136176	2	1	3	13
chr2:28783978-28788657	PPP1CB	NA	NA	NA	NA	NA	NA	NA	NA	NA	NA	NA	NA	NA	-0.00151407	NA	NA	NA	NA	NA	NA	NA	NA	NA	NA	NA	NA	NA	NA	NA	NA	NA	NA	NA	1	0	1	1
chr5:172107852-172117480	STK10	NA	NA	NA	NA	NA	NA	NA	NA	NA	NA	NA	NA	NA	-0.00164923	NA	NA	NA	NA	NA	NA	NA	NA	NA	NA	NA	NA	NA	NA	NA	NA	NA	NA	NA	1	0	1	1
chr17:75920107-75920273	FBF1	0.253961	-0.912356	NA	0.0564854	0.410977	NA	NA	0.278469	0.471149	NA	NA	NA	0.48439	NA	0.101426	NA	NA	0.449336	0.0365967	-0.551693	NA	NA	NA	NA	-0.129509	0.352492	-0.649092	-0.107985	0.357735	-0.174305	NA	-0.336051	NA	0	1	1	18
chr3:101855458-101855732	NFKBIZ	NA	NA	-0.455013	0.129105	0.581162	NA	NA	0.711138	NA	NA	NA	0.0286773	0.00231341	-0.0898087	NA	NA	-0.248663	0.577188	0.376921	0.213033	0.494242	NA	NA	NA	NA	NA	0.178344	NA	0.1855	NA	NA	NA	NA	0	2	2	14
chr15:75878021-75879097	UBE2Q2	NA	NA	NA	NA	NA	NA	NA	NA	NA	NA	NA	NA	NA	-0.0317773	NA	NA	NA	NA	NA	NA	NA	NA	NA	NA	NA	NA	NA	NA	NA	NA	NA	NA	NA	1	0	1	1
chr8:66850920-66859410	C8orf44-SGK3	NA	NA	NA	NA	NA	NA	NA	NA	NA	NA	NA	NA	NA	-0.00037563	NA	NA	NA	NA	NA	NA	NA	NA	NA	NA	NA	NA	NA	NA	NA	NA	NA	NA	NA	1	0	1	1
chr11:117291049-117291711	BACE1	-0.247461	-0.00174243	-0.0226651	0.304782	0.15037	0.431974	NA	-0.147019	-0.181922	-0.0832429	-0.119085	0.0373683	0.171918	0.917663	0.22686	0.168365	-0.598109	0.702192	-0.235111	0.815468	0.331566	-0.265269	0.156786	-0.261859	-0.226811	-0.27371	-0.135982	-0.220412	-0.712032	-0.596549	0.836412	-0.370162	-0.0582852	2	1	3	32
chr9:136348767-136349586	GPSM1	NA	NA	NA	NA	NA	NA	NA	NA	NA	NA	NA	NA	NA	-0.00590614	NA	NA	NA	NA	NA	-0.165772	NA	NA	NA	NA	NA	NA	NA	NA	NA	NA	NA	NA	NA	1	0	1	2
chr2:27203345-27203778	SLC5A6	NA	NA	NA	NA	NA	NA	NA	NA	NA	NA	NA	NA	NA	-0.0315728	NA	NA	NA	NA	NA	NA	NA	NA	NA	NA	NA	NA	NA	NA	NA	NA	NA	NA	NA	1	0	1	1
chr10:99716461-99718345	COX15	0.585588	-0.17167	0.844771	-0.246269	0.419531	0.109244	NA	0.499383	-0.883065	0.637817	NA	7.1e-06	0.38485	-0.495781	-0.322055	-0.0835202	0.15278	-0.104332	0.20042	0.650367	0.432826	0.183571	0.0439271	0.17548	0.160921	-0.283579	0.0249673	-0.115774	0.166484	-0.194444	NA	0.499453	-0.0699804	0	3	3	30
chr8:66667701-66676744	C8orf44	NA	NA	NA	NA	NA	NA	NA	-0.348449	NA	NA	NA	NA	NA	NA	NA	NA	NA	NA	NA	0.0253875	NA	NA	NA	NA	NA	NA	-0.374067	NA	NA	NA	NA	NA	NA	0	1	1	3
chr22:42587572-42591954	POLDIP3	NA	NA	NA	NA	NA	NA	NA	NA	NA	NA	NA	NA	NA	-0.006939	NA	NA	NA	NA	NA	NA	NA	NA	NA	NA	NA	NA	NA	NA	NA	NA	NA	NA	NA	1	0	1	1
chr2:216109457-216113015	XRCC5	NA	NA	NA	NA	NA	NA	NA	NA	NA	NA	NA	NA	NA	-0.0352905	NA	NA	NA	NA	NA	NA	NA	NA	NA	NA	NA	NA	NA	NA	NA	NA	NA	NA	NA	1	0	1	1
chr1:154597267-154597827	ADAR	NA	NA	NA	NA	NA	NA	NA	NA	NA	NA	NA	NA	NA	-0.00816945	NA	NA	NA	NA	NA	NA	NA	NA	NA	NA	NA	NA	NA	NA	NA	NA	NA	NA	NA	1	0	1	1
chr1:119941754-119948413	NOTCH2	NA	NA	NA	NA	NA	NA	NA	NA	NA	NA	NA	NA	NA	-0.00977167	NA	NA	NA	NA	NA	NA	NA	NA	NA	NA	NA	NA	NA	NA	NA	NA	NA	NA	NA	1	0	1	1
chr15:42276410-42278481	GANC	NA	NA	NA	NA	NA	NA	NA	NA	NA	NA	NA	NA	NA	-0.0334991	NA	NA	NA	NA	NA	NA	NA	NA	NA	NA	NA	NA	NA	NA	NA	NA	NA	NA	NA	1	0	1	1
chr5:178210272-178210552	HNRNPAB	NA	NA	NA	NA	NA	NA	NA	NA	NA	NA	NA	0.0157614	NA	-0.0024629	NA	NA	NA	NA	NA	NA	NA	NA	NA	NA	NA	NA	NA	NA	NA	NA	NA	NA	NA	1	1	2	2
chr9:98210843-98213107	TBC1D2	NA	NA	NA	NA	NA	NA	NA	NA	NA	NA	NA	NA	NA	-0.0214506	NA	NA	NA	NA	NA	NA	NA	NA	NA	NA	NA	NA	NA	NA	NA	NA	NA	NA	NA	1	0	1	1
chr17:41771862-41772817	JUP	NA	-0.00671899	NA	NA	NA	NA	NA	NA	NA	NA	NA	NA	NA	NA	NA	NA	NA	NA	NA	NA	NA	NA	NA	NA	NA	NA	NA	NA	NA	NA	NA	NA	NA	1	0	1	1
chr11:67996784-67997674	UNC93B1	NA	NA	NA	NA	NA	NA	NA	NA	NA	NA	NA	NA	NA	-0.0374177	NA	NA	NA	NA	NA	NA	NA	NA	NA	NA	NA	NA	NA	NA	NA	NA	NA	NA	NA	1	0	1	1
chr14:92071053-92080964	ATXN3	NA	NA	NA	NA	NA	NA	NA	NA	NA	NA	NA	NA	NA	-0.0337141	NA	NA	NA	NA	NA	NA	NA	NA	NA	NA	NA	NA	NA	NA	NA	NA	NA	NA	NA	1	0	1	1
chr13:21514418-21521244	MICU2	NA	NA	NA	NA	NA	NA	NA	NA	NA	NA	NA	NA	NA	-0.0479678	NA	NA	NA	NA	NA	NA	NA	0.52199	NA	NA	NA	NA	NA	NA	NA	NA	NA	NA	NA	1	0	1	2
chr8:144099618-144099702	SHARPIN	NA	NA	NA	NA	NA	NA	NA	NA	NA	NA	NA	NA	NA	-0.00871413	NA	NA	NA	NA	NA	NA	NA	NA	NA	NA	NA	NA	NA	NA	NA	NA	NA	NA	NA	1	0	1	1
chr22:20727864-20729312	PI4KA	NA	NA	NA	NA	NA	NA	NA	NA	NA	NA	NA	NA	NA	-0.00564264	NA	NA	NA	NA	NA	NA	NA	NA	NA	NA	NA	NA	NA	NA	NA	NA	NA	NA	NA	1	0	1	1
chr17:7313469-7313567	GPS2	NA	NA	NA	NA	NA	NA	NA	NA	NA	NA	NA	NA	NA	-0.00148771	NA	NA	NA	NA	NA	NA	NA	NA	NA	NA	NA	NA	NA	NA	NA	NA	NA	NA	NA	1	0	1	1
chr16:84981994-84988762	ZDHHC7	NA	NA	NA	-0.428654	0.426315	NA	NA	0.580849	NA	NA	NA	0.0115526	0.486304	-0.0873088	NA	NA	-0.520068	-0.170324	NA	-0.23866	-0.13992	NA	NA	NA	NA	NA	-0.337556	NA	NA	NA	NA	NA	-0.300973	0	1	1	12
chr17:43769814-43774711	DUSP3	NA	NA	NA	NA	NA	NA	NA	NA	NA	NA	NA	NA	NA	-0.015993	NA	NA	NA	NA	NA	NA	NA	NA	NA	NA	NA	NA	NA	NA	NA	NA	NA	NA	NA	1	0	1	1
chr20:62338608-62345817	LAMA5	NA	NA	NA	NA	NA	NA	NA	NA	NA	NA	NA	NA	NA	NA	NA	NA	NA	NA	NA	-0.0125505	NA	NA	NA	NA	NA	NA	NA	NA	NA	NA	NA	NA	NA	1	0	1	1
chr9:125153985-125158240	PPP6C	NA	NA	NA	NA	NA	NA	NA	NA	NA	NA	NA	NA	NA	-0.0353707	NA	NA	NA	NA	NA	NA	NA	NA	NA	NA	NA	NA	NA	NA	NA	NA	NA	NA	NA	1	0	1	1
chr4:78595887-78597318	ANXA3	NA	NA	NA	-0.539644	-0.257586	NA	NA	0.126556	NA	NA	NA	NA	-0.104851	NA	NA	NA	-0.137336	NA	NA	NA	-0.00389094	NA	NA	NA	NA	NA	NA	-0.93596	0.625819	NA	NA	NA	NA	1	0	1	8
chr17:50378895-50379106	EME1	NA	NA	NA	0.142496	NA	NA	NA	0.041915	-0.825216	NA	NA	NA	NA	-0.911404	NA	NA	NA	-0.240464	NA	-0.110604	NA	NA	NA	NA	NA	NA	-0.353736	-0.741837	NA	NA	NA	0.385128	NA	0	1	1	9
chr20:17969141-17969800	MGME1	0.0158144	-0.099584	0.0576186	-0.221647	-0.579269	-0.158845	0.156739	0.44225	-0.13127	0.1925	-0.228189	0.396931	-0.389521	0.775017	-0.298444	NA	-0.200119	0.387289	-0.868172	-0.695988	-0.408551	NA	0.747883	0.535171	-0.806288	-0.140973	0.0695403	0.163516	0.222266	0.50286	NA	0.0847465	0.0633715	0	1	1	30
chr7:74376822-74380805	CLIP2	NA	NA	NA	NA	NA	NA	NA	NA	NA	NA	NA	NA	NA	-0.0319598	NA	NA	NA	NA	NA	NA	NA	NA	NA	NA	NA	NA	NA	NA	NA	NA	NA	NA	NA	1	0	1	1
chr8:98222600-98236154	NIPAL2	NA	NA	NA	NA	NA	NA	NA	NA	NA	NA	NA	NA	NA	-0.0437388	NA	NA	NA	NA	NA	NA	NA	NA	NA	NA	NA	NA	NA	NA	NA	NA	NA	NA	NA	1	0	1	1
chr9:35557990-35558196	RUSC2	NA	NA	NA	NA	0.26225	NA	NA	-0.522047	0.21544	NA	NA	NA	NA	-0.142258	NA	NA	NA	NA	0.136418	NA	NA	NA	NA	NA	NA	NA	-0.0451298	NA	NA	NA	NA	NA	NA	1	0	1	6
chr7:44208198-44211022	YKT6	NA	NA	NA	NA	NA	NA	NA	NA	NA	NA	NA	NA	-0.0437062	-0.0010998	NA	NA	NA	NA	NA	NA	NA	NA	NA	NA	NA	NA	NA	NA	NA	NA	NA	NA	NA	2	0	2	2
chr2:33558336-33558671	RASGRP3	NA	NA	NA	NA	NA	NA	NA	NA	NA	NA	NA	NA	NA	-0.0135128	NA	NA	NA	NA	NA	NA	NA	NA	NA	NA	NA	NA	NA	NA	NA	NA	NA	NA	NA	1	0	1	1
chr12:110016433-110018344	ANKRD13A	NA	NA	NA	NA	NA	NA	NA	NA	NA	NA	NA	NA	NA	-0.0454585	NA	NA	NA	NA	NA	NA	NA	NA	NA	NA	NA	NA	NA	NA	NA	NA	NA	NA	NA	1	0	1	1
chr17:16313614-16316680	PIGL	NA	NA	NA	NA	NA	NA	NA	0.270746	NA	NA	NA	NA	NA	-0.0248977	NA	NA	NA	NA	NA	NA	NA	NA	NA	NA	NA	NA	0.407401	NA	NA	NA	NA	NA	NA	1	0	1	3
chr1:1637202-1637407	CDK11B	0.227304	-0.0369318	NA	0.41324	-0.487045	0.522653	0.378227	0.212404	NA	-0.221859	0.793109	0.00010269	-0.130345	-0.0509227	NA	-0.176306	0.577993	-0.28875	-0.166948	-0.55047	-0.585054	0.626705	NA	-0.201838	NA	0.214509	-0.413765	-0.686719	NA	-0.305582	0.174908	0.0147538	NA	1	2	3	26
chr12:123655824-123659515	GTF2H3	NA	NA	NA	NA	NA	NA	NA	NA	0.89058	NA	NA	NA	NA	-0.0135155	NA	NA	NA	-0.255002	NA	-0.476204	NA	NA	NA	NA	NA	NA	NA	NA	NA	NA	NA	NA	NA	1	0	1	4
chr19:10489368-10489647	KEAP1	NA	NA	NA	NA	NA	NA	NA	NA	NA	NA	NA	NA	NA	-0.00075703	NA	NA	NA	NA	NA	NA	NA	NA	NA	NA	NA	NA	NA	NA	NA	NA	NA	NA	NA	1	0	1	1
chr17:44079277-44080106	HDAC5	NA	NA	NA	NA	NA	NA	NA	NA	NA	NA	NA	NA	NA	-0.00018315	NA	NA	NA	NA	NA	NA	NA	NA	NA	NA	NA	NA	NA	NA	NA	NA	NA	NA	NA	1	0	1	1
chr18:691106-691203	ENOSF1	-0.0683373	-0.0726155	0.522059	0.586121	-0.363538	0.146891	-0.545402	-0.653534	-0.0185458	-0.380325	-0.55369	0.00809357	0.296691	-0.0142274	0.3342	0.756914	-0.0425407	-0.451176	0.335081	-0.71017	0.358757	0.28791	0.775652	0.534806	0.690796	0.261295	-0.183197	0.464542	0.335657	-0.448732	0.1151	-0.556973	-0.383772	3	1	4	33
chr11:60389596-60392684	MS4A7	NA	NA	-0.343776	NA	NA	NA	NA	-0.345116	NA	NA	-0.68917	0.112956	NA	-0.671589	NA	NA	-0.239549	NA	NA	NA	NA	NA	NA	NA	NA	NA	0.0255127	NA	NA	NA	NA	NA	NA	0	1	1	7
chr7:843520-848417	SUN1	NA	NA	NA	NA	NA	NA	NA	NA	NA	NA	NA	NA	NA	NA	-0.0430287	NA	NA	NA	NA	NA	NA	NA	NA	NA	NA	NA	NA	NA	NA	NA	NA	NA	NA	1	0	1	1
chr1:161124526-161130814	DEDD	NA	NA	NA	NA	NA	NA	NA	NA	NA	NA	NA	NA	NA	-0.0198616	NA	NA	NA	NA	NA	NA	NA	NA	NA	NA	NA	NA	NA	NA	NA	NA	NA	NA	NA	1	0	1	1
chr11:128782023-128805365	FLI1	NA	NA	NA	NA	NA	NA	NA	NA	NA	NA	NA	NA	NA	-0.0332918	NA	NA	NA	NA	NA	NA	NA	NA	NA	NA	NA	NA	NA	NA	NA	NA	NA	NA	NA	1	0	1	1
chr20:46358763-46364370	SLC35C2	NA	NA	NA	NA	NA	NA	0.54281	0.149418	NA	NA	NA	NA	NA	-0.00889466	NA	NA	-0.0446963	NA	NA	-0.121759	NA	0.827811	NA	-0.41573	NA	NA	0.512713	NA	NA	NA	NA	NA	NA	2	0	2	8
chr2:24205297-24208236	ITSN2	NA	NA	NA	NA	0.0975273	NA	0.481808	-0.549456	NA	NA	NA	0.0158707	NA	-0.00036086	NA	NA	-0.575264	NA	NA	-0.543734	-0.25958	NA	NA	NA	NA	NA	-0.482241	NA	0.845984	NA	NA	NA	NA	1	1	2	10
chr9:35714373-35714573	TLN1	NA	NA	NA	NA	NA	NA	NA	NA	NA	NA	NA	NA	NA	-0.00275889	NA	NA	NA	NA	NA	NA	NA	NA	NA	NA	NA	NA	NA	NA	NA	NA	NA	NA	NA	1	0	1	1
chr14:21358002-21358314	SUPT16H	-0.267226	-0.202955	NA	-0.203382	0.0927473	0.468525	NA	NA	NA	NA	NA	0.00125282	-0.306348	-0.278463	NA	NA	-0.683949	-0.524808	-0.913425	-0.0416549	0.960195	0.916664	NA	NA	NA	0.105117	-0.416588	NA	0.900044	0.582614	NA	0.126396	NA	1	1	2	19
chr9:111390101-111391755	ECPAS	NA	NA	NA	NA	NA	NA	NA	NA	NA	NA	NA	NA	NA	-0.00044018	NA	NA	NA	NA	NA	NA	NA	NA	NA	NA	NA	NA	NA	NA	NA	NA	NA	NA	NA	1	0	1	1
chr13:28034214-28034300	FLT3	NA	NA	NA	NA	NA	NA	NA	NA	NA	NA	NA	NA	NA	-0.0178531	NA	NA	NA	NA	NA	NA	NA	NA	NA	NA	NA	NA	NA	NA	NA	NA	NA	NA	NA	1	0	1	1
chr17:72648961-72649169	SLC39A11	NA	NA	NA	NA	NA	NA	NA	NA	NA	NA	NA	NA	NA	-0.0351794	NA	NA	NA	NA	NA	NA	NA	NA	NA	NA	NA	NA	NA	NA	NA	NA	NA	NA	NA	1	0	1	1
chr9:128122479-128122933	PTGES2	0.398516	-0.00531328	-0.041184	0.787691	0.515569	0.15271	0.181897	-0.355852	-0.258761	-0.0424622	NA	0.00097034	-0.696278	-0.178108	0.238266	0.269108	-0.857372	-0.154478	-0.119054	0.171145	-0.638644	-0.447885	0.00088717	0.465246	-0.261429	0.346713	0.219928	-0.110215	0.401086	-0.200042	0.516691	0.276434	0.123572	3	2	5	32
chr6:33295759-33296027	RGL2	-0.106111	-0.0103657	-0.209444	0.489137	0.0895641	0.469778	0.0580917	0.176686	0.315764	-0.494658	0.668205	0.00113544	0.184534	-0.704374	-0.0101398	-0.00987215	-0.0428108	-0.138777	0.560259	0.52905	-0.14178	0.13586	0.00030806	0.0598412	-0.061987	0.344472	-0.330956	-0.0271211	0.277194	0.303151	-0.559792	0.223835	0.323104	5	2	7	33
chr2:96829134-96832551	CNNM3	NA	NA	-0.147689	-0.561249	-0.277987	-0.361911	-0.789488	0.119436	-0.468403	NA	NA	0.00133198	0.27584	-0.655011	-0.517585	NA	-0.345647	0.565242	-0.512151	-0.595977	0.0661277	0.799896	0.0066291	0.0825518	0.162162	0.172315	-0.727304	-0.248378	0.533534	-0.0190315	NA	0.241312	-0.678488	1	2	3	27
chr22:17579964-17581036	SLC25A18	NA	NA	NA	NA	NA	NA	NA	NA	0.133949	NA	NA	NA	NA	NA	0.110848	-0.00370082	NA	NA	NA	NA	NA	NA	NA	NA	NA	NA	NA	NA	NA	NA	NA	NA	NA	1	0	1	3
chr1:1267992-1273665	UBE2J2	NA	NA	NA	NA	NA	NA	NA	NA	NA	NA	NA	NA	NA	-0.039745	NA	NA	NA	NA	NA	NA	NA	NA	NA	NA	NA	NA	NA	NA	NA	NA	NA	NA	NA	1	0	1	1
chr17:58210724-58210979	MKS1	NA	NA	NA	NA	NA	NA	NA	0.251998	0.371989	NA	NA	0.610646	0.099645	-0.16911	-0.396092	NA	-0.147308	-0.113607	NA	0.0302842	NA	NA	NA	NA	NA	NA	-0.217611	NA	NA	NA	NA	-0.33568	NA	0	1	1	11
chr9:137212599-137213779	NDOR1	-0.578258	-0.0847244	-0.528556	-0.28654	0.533756	NA	-0.587767	0.373185	0.0481832	NA	-0.596324	0.00793419	-0.0991778	-0.0575308	0.0365251	NA	-0.667984	-0.824815	-0.714884	-0.679082	-0.486528	NA	0.190393	NA	-0.358937	0.349256	0.393544	-0.0510269	0.275565	0.330467	NA	0.385084	NA	0	3	3	26
chr4:75914985-75918760	NAAA	NA	NA	-0.0287443	NA	-0.144196	-0.304555	-0.296389	0.0881016	0.379207	NA	NA	-0.60649	-0.14779	-0.341001	NA	NA	-0.409721	NA	0.332034	-0.411145	-0.212281	0.998877	-0.192215	0.0392901	-0.438105	NA	0.150041	NA	-0.183548	NA	NA	NA	NA	1	1	2	19
chr7:66545686-66554584	AC006001.3	NA	NA	NA	NA	NA	NA	NA	0.181733	NA	NA	NA	NA	NA	-0.418137	NA	NA	NA	NA	NA	NA	NA	NA	NA	NA	NA	NA	0.631808	-0.01677	NA	NA	NA	NA	NA	1	0	1	4
chr20:57365442-57366806	RAE1	NA	NA	NA	NA	NA	NA	NA	NA	NA	NA	NA	NA	NA	-0.00349523	NA	NA	NA	NA	NA	NA	NA	NA	NA	NA	NA	NA	NA	NA	NA	NA	NA	NA	NA	1	0	1	1
chr3:4981515-4982835	BHLHE40	-0.0953435	-0.0140978	NA	NA	NA	NA	NA	0.299294	NA	NA	NA	0.00373098	0.453885	-3.541e-05	NA	NA	-0.112282	NA	NA	NA	NA	NA	NA	NA	NA	NA	NA	NA	NA	NA	-0.588553	-0.593748	NA	2	1	3	9
chr2:27094611-27094799	KHK	NA	NA	NA	NA	NA	NA	NA	NA	NA	NA	NA	0.00021255	NA	NA	NA	0.38186	NA	NA	NA	NA	NA	NA	NA	NA	NA	NA	NA	NA	NA	NA	NA	NA	NA	0	1	1	2
chr17:5335344-5338018	RABEP1	NA	NA	NA	NA	NA	NA	NA	NA	NA	NA	NA	NA	NA	-0.0166458	NA	NA	NA	NA	NA	NA	NA	NA	NA	NA	NA	NA	NA	NA	NA	NA	NA	NA	NA	1	0	1	1
chr17:47973693-47973930	CDK5RAP3	NA	NA	NA	NA	NA	NA	NA	0.858039	NA	NA	NA	NA	NA	-0.0298215	NA	NA	-0.468237	0.196455	NA	-0.307454	NA	NA	NA	NA	NA	NA	-0.452375	NA	NA	NA	NA	NA	NA	1	0	1	6
chr15:92974950-92978233	CHD2	NA	NA	NA	NA	NA	NA	NA	NA	NA	NA	NA	NA	NA	-0.0261751	NA	NA	NA	NA	NA	NA	NA	NA	NA	NA	NA	NA	NA	NA	NA	NA	NA	NA	NA	1	0	1	1
chr4:39465202-39465284	LIAS	NA	NA	NA	NA	NA	NA	NA	-0.408429	0.41832	NA	NA	NA	NA	-0.0215289	NA	NA	NA	NA	NA	NA	NA	NA	NA	NA	NA	NA	0.185741	NA	NA	NA	NA	NA	NA	1	0	1	4
chr5:14507260-14507879	TRIO	NA	-0.0111568	NA	NA	NA	NA	NA	NA	NA	NA	NA	NA	NA	-0.122433	NA	NA	NA	NA	NA	NA	NA	NA	NA	NA	NA	NA	NA	NA	NA	NA	NA	NA	NA	1	0	1	2
chr9:35101962-35102094	STOML2	NA	NA	NA	NA	NA	NA	NA	NA	NA	NA	NA	NA	NA	-0.00988772	NA	NA	NA	NA	NA	NA	NA	NA	NA	NA	NA	NA	NA	NA	NA	NA	NA	NA	NA	1	0	1	1
chr14:76180849-76195877	GPATCH2L	NA	NA	NA	NA	NA	NA	NA	NA	NA	NA	NA	NA	NA	-0.00350575	NA	NA	NA	NA	NA	NA	NA	NA	NA	NA	NA	NA	NA	NA	NA	NA	NA	NA	NA	1	0	1	1
chr17:64001310-64001466	PRR29	NA	NA	NA	NA	NA	NA	NA	NA	NA	NA	NA	NA	NA	NA	NA	NA	NA	NA	NA	NA	NA	NA	NA	NA	NA	NA	NA	NA	0.0409197	NA	NA	NA	NA	0	1	1	1
chr21:32755353-32759079	PAXBP1	NA	-0.474199	-0.171537	0.145183	-0.997006	NA	NA	0.804795	0.703768	NA	NA	0.00011876	0.587449	0.660601	0.0714561	NA	-0.285789	0.681436	0.349421	-0.582939	-0.754268	0.433181	0.260235	NA	0.412312	0.224375	0.765834	-0.233962	0.211496	NA	NA	0.0346877	NA	0	2	2	23
chrX:154413567-154414100	TAZ	NA	NA	NA	NA	NA	NA	NA	-0.0363699	NA	NA	NA	-0.060118	NA	-0.44781	-0.173062	NA	NA	NA	NA	NA	NA	NA	NA	NA	NA	NA	0.0741476	NA	NA	NA	NA	NA	NA	1	0	1	5
chr19:18432070-18432146	SSBP4	NA	NA	NA	NA	NA	NA	NA	NA	NA	NA	NA	NA	NA	-0.00042657	NA	NA	NA	NA	NA	NA	NA	NA	NA	NA	NA	NA	NA	NA	NA	NA	NA	NA	NA	1	0	1	1
chr4:153620880-153621682	TMEM131L	NA	NA	NA	NA	NA	NA	NA	NA	NA	NA	NA	NA	NA	-0.0278176	NA	NA	NA	NA	NA	NA	NA	NA	NA	NA	NA	NA	NA	NA	NA	NA	NA	NA	NA	1	0	1	1
chr22:19410778-19431439	HIRA	NA	NA	NA	NA	NA	NA	NA	NA	NA	NA	NA	NA	NA	-0.0320418	NA	NA	NA	NA	NA	NA	NA	NA	NA	NA	NA	NA	NA	NA	NA	NA	NA	NA	NA	1	0	1	1
chr7:900616-904125	ADAP1	NA	NA	NA	NA	NA	NA	NA	NA	NA	NA	NA	NA	NA	-0.00294882	NA	NA	NA	NA	NA	NA	NA	NA	NA	NA	NA	NA	NA	NA	NA	NA	NA	NA	NA	1	0	1	1
chr6:33700513-33701345	UQCC2	NA	NA	NA	NA	NA	NA	NA	NA	NA	NA	NA	NA	NA	-0.00165889	NA	NA	NA	NA	NA	NA	NA	NA	NA	NA	NA	NA	NA	NA	NA	NA	NA	NA	NA	1	0	1	1
chr1:28011086-28013110	EYA3	NA	NA	NA	NA	NA	NA	NA	NA	NA	NA	NA	NA	NA	-0.0047574	NA	NA	NA	NA	NA	NA	NA	NA	NA	NA	NA	NA	NA	NA	NA	NA	NA	NA	NA	1	0	1	1
chr17:29092456-29092854	MYO18A	NA	NA	NA	NA	NA	NA	NA	NA	NA	NA	NA	NA	NA	-0.0272371	NA	NA	NA	NA	NA	NA	NA	NA	NA	NA	NA	NA	NA	NA	NA	NA	NA	NA	NA	1	0	1	1
chr9:137011105-137011185	ABCA2	NA	NA	NA	NA	0.893816	NA	NA	NA	NA	NA	NA	0.0234971	NA	NA	NA	NA	0.0342847	NA	NA	NA	NA	0.891711	NA	NA	NA	NA	NA	NA	NA	NA	NA	NA	NA	0	2	2	4
chr20:44936730-44938060	PABPC1L	NA	0.803933	NA	NA	NA	NA	NA	-0.0373518	-0.547568	NA	NA	NA	NA	-0.242503	NA	NA	0.0650838	0.253113	NA	NA	NA	NA	NA	NA	NA	0.127321	-0.622601	-0.0551566	NA	NA	NA	-0.179645	NA	1	0	1	10
chr7:100478307-100478793	TSC22D4	-0.0182055	-0.649948	-0.414778	0.390611	-0.534778	-0.239596	NA	-0.528712	NA	0.172293	0.0792018	0.00396129	0.03636	-0.0561004	NA	NA	-0.288182	-0.34289	0.0634333	-0.277916	-0.138187	NA	0.0248323	-0.536635	NA	0.312788	-0.440317	-0.0285515	-0.261757	-0.149501	NA	0.146349	NA	2	3	5	25
chr11:111743530-111747953	PPP2R1B	NA	NA	NA	NA	NA	NA	NA	NA	NA	NA	NA	NA	NA	-0.0313192	NA	NA	NA	NA	NA	NA	NA	NA	NA	NA	NA	NA	NA	NA	NA	NA	NA	NA	NA	1	0	1	1
chr16:8895741-8896998	USP7	NA	NA	NA	NA	NA	NA	NA	NA	NA	NA	NA	NA	NA	-0.0259452	NA	NA	NA	NA	NA	NA	NA	NA	NA	NA	NA	NA	NA	NA	NA	NA	NA	NA	NA	1	0	1	1
chr9:86310017-86310705	TUT7	NA	NA	NA	NA	NA	NA	NA	NA	NA	NA	NA	NA	NA	-0.0495917	NA	NA	NA	NA	NA	NA	NA	NA	NA	NA	NA	NA	NA	NA	NA	NA	NA	NA	NA	1	0	1	1
chr18:677872-678695	ENOSF1	NA	NA	-0.493924	0.521707	NA	NA	NA	-0.241527	NA	NA	NA	0.00529938	NA	-0.306652	NA	NA	-0.042858	-0.0842107	NA	0.439834	NA	NA	NA	NA	NA	-0.550556	-0.349583	NA	NA	NA	NA	NA	0.643822	1	1	2	11
chr3:119434882-119436790	TMEM39A	NA	-0.0156021	-0.258116	0.177602	0.0810561	NA	-0.404943	-0.658267	-0.45394	NA	-0.495696	-0.0498784	-0.523791	-0.923801	-0.00709457	NA	-0.211088	0.61305	-0.292027	0.374617	-0.278946	NA	0.0784187	-0.211681	-0.453973	0.768428	0.413898	0.800993	0.19356	NA	NA	0.280365	NA	3	0	3	25
chr1:153778355-153778462	SLC27A3	NA	-0.0664756	0.632586	0.245461	-0.0388336	0.0270546	0.700983	0.319988	-0.753117	0.340656	NA	0.0545052	-0.586865	-0.416599	-0.0580175	0.22971	-0.285707	0.774571	0.166964	-0.0641784	-0.415512	0.797202	NA	-0.338049	0.540637	0.0951236	-0.169067	0.585617	-0.206206	0.631294	0.2357	0.177732	0.99849	1	1	2	30
chr11:44615373-44618161	CD82	NA	NA	NA	NA	NA	NA	NA	NA	NA	NA	NA	NA	NA	-0.0066927	NA	NA	NA	NA	NA	NA	NA	NA	NA	NA	NA	NA	NA	NA	NA	NA	NA	NA	NA	1	0	1	1
chr17:47596462-47599675	NPEPPS	NA	NA	NA	NA	NA	NA	NA	NA	NA	NA	NA	NA	NA	-0.0114273	NA	NA	NA	NA	NA	NA	NA	NA	NA	NA	NA	NA	NA	NA	NA	NA	NA	NA	NA	1	0	1	1
chr10:79162133-79201583	ZMIZ1	NA	NA	NA	NA	NA	NA	NA	NA	NA	NA	NA	NA	NA	-0.0178296	NA	NA	NA	NA	NA	NA	NA	NA	NA	NA	NA	NA	NA	NA	NA	NA	NA	NA	NA	1	0	1	1
chr15:40775108-40775552	DNAJC17	NA	NA	NA	NA	NA	NA	NA	NA	NA	NA	NA	NA	NA	-0.0008855	NA	NA	NA	NA	NA	NA	NA	NA	NA	NA	NA	NA	NA	NA	NA	NA	NA	NA	NA	1	0	1	1
chr13:114282943-114286301	UPF3A	0.378539	-0.532008	-0.458692	-0.709397	0.466435	0.0468292	0.844802	-0.331198	-0.476091	NA	0.276329	0.0245638	-0.173029	-0.203838	0.0018524	NA	-0.196656	-0.533386	0.46602	0.399615	-0.375362	0.3054	0.0233207	-0.243957	NA	-0.599711	-0.290472	-0.127732	0.0694263	-0.241176	NA	-0.577773	NA	0	4	4	28
chr17:42697367-42697553	CNTNAP1	NA	NA	NA	NA	NA	NA	NA	0.158886	-0.479075	NA	NA	0.322113	NA	NA	-0.3673	NA	NA	NA	NA	NA	NA	NA	NA	NA	0.0223658	NA	-0.0370923	NA	NA	NA	NA	-0.154529	NA	1	1	2	7
chr8:38953367-38957322	PLEKHA2	NA	NA	NA	NA	NA	NA	NA	NA	NA	NA	NA	NA	NA	-0.00505595	NA	NA	NA	NA	NA	NA	NA	NA	NA	NA	NA	NA	NA	NA	NA	NA	NA	NA	NA	1	0	1	1
chr17:57529724-57596867	MSI2	NA	NA	NA	NA	NA	NA	NA	NA	NA	NA	NA	NA	NA	-0.00191571	NA	NA	NA	NA	NA	NA	NA	NA	NA	NA	NA	NA	NA	NA	NA	NA	NA	NA	NA	1	0	1	1
chr1:36092522-36093096	ADPRS	NA	NA	NA	NA	NA	NA	NA	NA	NA	NA	NA	NA	NA	-0.0144836	NA	NA	NA	NA	NA	NA	NA	NA	NA	NA	NA	NA	NA	NA	NA	NA	NA	NA	NA	1	0	1	1
chr22:20507746-20537116	MED15	NA	NA	NA	NA	NA	NA	NA	NA	NA	NA	NA	NA	NA	-0.03855	NA	NA	NA	NA	NA	NA	NA	NA	NA	NA	NA	NA	NA	NA	NA	NA	NA	NA	NA	1	0	1	1
chr16:69931580-69931801	WWP2	NA	NA	NA	NA	NA	NA	NA	NA	NA	NA	NA	-0.0190501	0.720146	-0.0175582	NA	NA	NA	NA	NA	NA	NA	NA	NA	NA	NA	NA	NA	NA	NA	NA	NA	NA	NA	2	0	2	3
chr22:31291296-31292274	PIK3IP1	NA	0.164554	-0.420123	-0.0132713	-0.741654	NA	NA	-0.53046	NA	0.311658	0.871078	0.00061803	NA	-0.568697	NA	NA	0.485745	-0.212069	NA	-0.819421	-0.187835	0.54568	NA	-0.323394	NA	NA	-0.378409	NA	0.752774	0.175683	NA	NA	NA	1	1	2	18
chr2:20327378-20350596	PUM2	NA	NA	NA	NA	NA	NA	NA	NA	NA	NA	NA	NA	NA	-0.0205153	NA	NA	NA	NA	NA	NA	NA	NA	NA	NA	NA	NA	NA	NA	NA	NA	NA	NA	NA	1	0	1	1
chr8:97691188-97706625	MTDH	NA	NA	NA	NA	NA	NA	NA	NA	NA	NA	NA	NA	NA	-0.00386096	NA	NA	NA	NA	NA	NA	NA	NA	NA	NA	NA	NA	NA	NA	NA	NA	NA	NA	NA	1	0	1	1
chr7:149549374-149550867	ZNF767P	NA	NA	NA	NA	NA	NA	NA	0.331865	NA	NA	NA	NA	NA	-0.0437348	NA	NA	NA	NA	NA	NA	NA	NA	NA	NA	NA	NA	NA	NA	NA	NA	NA	NA	NA	1	0	1	2
chrX:47239179-47239350	USP11	NA	NA	NA	NA	NA	NA	NA	NA	NA	NA	NA	NA	NA	-0.0446056	NA	NA	NA	NA	NA	NA	NA	NA	NA	NA	NA	NA	NA	NA	NA	NA	NA	NA	NA	1	0	1	1
chr19:46678663-46681649	PRKD2	NA	NA	NA	NA	NA	NA	NA	NA	NA	NA	NA	0.281196	NA	-0.017484	NA	NA	NA	NA	NA	NA	NA	NA	NA	NA	NA	NA	NA	NA	NA	NA	NA	NA	NA	1	0	1	2
chr16:88725080-88725415	PIEZO1	NA	NA	NA	NA	NA	NA	NA	NA	NA	NA	NA	NA	NA	-0.0316607	NA	NA	NA	NA	NA	NA	NA	NA	NA	NA	NA	NA	NA	NA	NA	NA	NA	NA	NA	1	0	1	1
chr22:41325597-41325720	ZC3H7B	NA	NA	NA	NA	NA	NA	NA	NA	NA	NA	NA	NA	NA	-0.00254534	NA	NA	NA	NA	NA	NA	NA	NA	NA	NA	NA	NA	NA	NA	NA	NA	NA	NA	NA	1	0	1	1
chr2:48495771-48498492	PPP1R21	NA	NA	NA	NA	NA	NA	NA	0.451178	NA	NA	NA	NA	NA	-0.00155894	NA	NA	NA	NA	NA	NA	NA	NA	NA	NA	NA	NA	NA	NA	NA	NA	NA	NA	NA	1	0	1	2
chr19:46016393-46016693	CCDC61	0.240125	-0.461376	NA	-0.676349	0.324901	0.16579	-0.356692	0.376182	-0.0609601	NA	-0.956569	0.0180397	NA	-0.0111196	NA	NA	0.219532	-0.0986198	-0.345179	-0.022384	-0.0725324	-0.998855	NA	-0.662482	NA	0.205276	-0.321652	-0.634439	0.372926	0.149928	NA	0.330112	NA	2	1	3	24
chr17:8147827-8147996	PER1	0.836973	NA	NA	NA	NA	NA	NA	0.129717	0.470392	NA	NA	0.0237717	0.118829	-0.0292509	-0.895656	NA	0.29057	NA	NA	-0.0436286	0.583989	-0.999062	NA	NA	-0.39742	NA	0.511483	NA	-0.186274	NA	NA	NA	NA	2	1	3	14
chr15:90911238-90911384	MAN2A2	NA	NA	-0.226942	0.119641	-0.532835	0.457659	NA	-0.212964	-0.316441	NA	NA	0.00280781	-0.668967	-0.0900496	-0.19572	NA	-0.406429	-0.0904669	NA	-0.11763	-0.0741164	0.695168	0.102888	NA	NA	-0.389913	-0.329144	NA	0.382199	NA	NA	NA	-0.344153	0	1	1	20
chr19:10919680-10919876	CARM1	-0.106455	-0.0649264	NA	0.787767	0.228431	NA	NA	NA	0.750607	NA	NA	0.388985	-0.250971	-0.218958	0.760995	NA	-0.258552	NA	-0.294559	NA	-0.0440798	NA	NA	NA	NA	NA	NA	0.68663	0.69745	NA	0.856615	-0.323253	NA	1	0	1	16
chr3:101585511-101590214	PCNP	NA	NA	NA	NA	NA	NA	NA	NA	NA	NA	NA	NA	NA	-0.00459613	NA	NA	NA	NA	NA	NA	NA	NA	NA	NA	NA	NA	NA	NA	NA	NA	NA	NA	NA	1	0	1	1
chr11:65635803-65636173	PCNX3	-0.687734	-0.0177201	0.659713	0.184847	-0.15063	0.0558718	0.353788	0.852615	-0.0320318	-0.390031	0.998968	0.111136	0.566332	-0.110339	0.237403	NA	-0.755921	0.452652	0.128252	-0.196398	0.514995	NA	0.150388	0.351914	0.594539	-0.691857	0.0563878	-0.261915	NA	0.389738	-0.77613	-0.324155	NA	2	0	2	29
chr13:40941370-40942951	ELF1	NA	NA	NA	NA	NA	NA	NA	NA	NA	NA	NA	NA	NA	-0.00472672	NA	NA	NA	NA	NA	NA	NA	NA	NA	NA	NA	NA	NA	NA	NA	NA	NA	NA	NA	1	0	1	1
chr6:34606904-34654624	ILRUN	NA	NA	NA	NA	NA	NA	NA	NA	NA	NA	NA	NA	NA	-0.0249724	NA	NA	NA	NA	NA	NA	NA	NA	NA	NA	NA	NA	NA	NA	NA	NA	NA	NA	NA	1	0	1	1
chr6:144828855-144835779	UTRN	NA	NA	NA	NA	NA	NA	NA	NA	NA	NA	NA	NA	NA	-0.0192803	NA	NA	NA	NA	NA	NA	NA	NA	NA	NA	NA	NA	NA	NA	NA	NA	NA	NA	NA	1	0	1	1
chr2:64569679-64572945	AFTPH	NA	NA	NA	NA	NA	NA	NA	NA	NA	NA	NA	NA	NA	-0.0113678	NA	NA	NA	NA	NA	NA	NA	NA	NA	NA	NA	NA	NA	NA	NA	NA	NA	NA	NA	1	0	1	1
chr11:65650051-65650137	SIPA1	NA	-0.305731	NA	NA	-0.29022	-0.198815	NA	NA	NA	NA	NA	0.38951	0.633307	-0.018528	-0.0517373	-0.531087	NA	-0.511031	NA	NA	-0.0913365	-0.883039	0.00533303	NA	0.148677	NA	NA	0.518242	NA	NA	0.453568	-0.260831	NA	1	1	2	16
chr15:78932458-78934977	CTSH	NA	NA	NA	NA	NA	NA	NA	NA	NA	NA	NA	NA	NA	-0.0400312	NA	NA	NA	NA	NA	NA	NA	NA	NA	NA	NA	NA	NA	NA	NA	NA	NA	NA	NA	1	0	1	1
chr8:23199448-23199885	TNFRSF10A	NA	NA	NA	NA	NA	NA	NA	0.0457881	NA	NA	NA	NA	NA	NA	NA	NA	NA	NA	NA	NA	NA	NA	NA	NA	NA	NA	NA	NA	NA	NA	NA	NA	NA	0	1	1	1
chr17:44194674-44194767	ATXN7L3	NA	NA	NA	NA	NA	NA	NA	NA	NA	NA	NA	NA	NA	-0.0452014	NA	NA	NA	NA	NA	NA	NA	NA	NA	NA	NA	NA	NA	NA	NA	NA	NA	NA	NA	1	0	1	1
chr2:85306365-85306451	TCF7L1	NA	NA	0.047953	NA	NA	NA	NA	-0.497199	0.0517482	NA	NA	0.0240783	NA	NA	0.117121	NA	-0.729293	0.424809	NA	-0.794552	NA	NA	NA	NA	-0.709682	NA	NA	0.832149	-0.462108	NA	NA	0.55055	NA	0	2	2	12
chr17:7317932-7318064	NEURL4	NA	0.670099	NA	0.0719652	NA	NA	NA	-0.676333	0.4042	NA	NA	0.0218195	0.463004	-0.583705	0.0647086	NA	NA	NA	NA	-0.0132936	NA	NA	NA	NA	-0.309327	-0.336643	0.514823	NA	NA	0.122153	NA	NA	NA	1	1	2	13
chr11:124878796-124879189	ROBO3	NA	NA	NA	NA	NA	NA	NA	NA	0.393988	NA	NA	-0.452381	NA	-0.00935783	-0.666632	NA	NA	NA	0.489078	0.0290384	NA	NA	NA	NA	NA	NA	NA	-0.498224	NA	-0.263006	NA	0.114211	NA	1	1	2	9
chr19:3781672-3783125	MATK	NA	NA	NA	NA	NA	NA	NA	NA	NA	NA	NA	NA	NA	-0.00456674	NA	NA	NA	NA	NA	NA	NA	NA	NA	NA	NA	NA	NA	NA	NA	NA	NA	NA	NA	1	0	1	1
chr16:74301144-74301554	PSMD7	NA	NA	NA	NA	NA	NA	NA	NA	NA	NA	NA	NA	NA	-0.00349237	NA	NA	NA	NA	NA	NA	NA	NA	NA	NA	NA	NA	NA	NA	NA	NA	NA	NA	NA	1	0	1	1
chr11:67396175-67396262	RAD9A	NA	0.313176	NA	0.127095	NA	NA	0.669121	0.0214284	-0.369395	NA	NA	NA	0.482015	-0.141541	NA	NA	NA	0.34143	NA	NA	NA	NA	NA	NA	NA	NA	-0.0580841	NA	NA	NA	NA	0.784648	NA	0	1	1	10
chr7:100887859-100888041	SRRT	NA	-0.00087141	NA	NA	-0.153382	0.0070385	NA	-0.44069	0.368658	NA	NA	0.0239693	-0.643065	-0.603877	0.386495	NA	-0.750564	-0.13718	-0.131482	-0.400986	-0.210164	-0.212116	NA	NA	0.112091	NA	-0.314855	NA	NA	-0.329541	NA	NA	-0.0926147	1	2	3	19
chr16:1662835-1665056	CRAMP1	NA	NA	NA	NA	NA	NA	NA	NA	NA	NA	NA	NA	NA	-0.0358119	NA	NA	NA	NA	NA	NA	NA	NA	NA	NA	NA	NA	NA	NA	NA	NA	NA	NA	NA	1	0	1	1
chr17:80367848-80367960	RNF213	NA	NA	NA	NA	NA	NA	NA	NA	NA	NA	NA	0.00689874	NA	NA	NA	NA	NA	NA	NA	NA	NA	NA	NA	NA	NA	NA	NA	NA	NA	NA	NA	NA	NA	0	1	1	1
chr12:56094189-56094401	ERBB3	NA	NA	0.234189	0.668445	0.80177	-0.16595	NA	-0.194312	NA	NA	NA	3.973e-05	0.305793	NA	0.168916	-0.0972556	-0.416464	0.420827	NA	-0.353717	-0.240297	NA	0.0191945	0.107873	NA	NA	0.145232	NA	NA	NA	NA	NA	0.998823	0	2	2	17
chr17:78709732-78736691	CYTH1	NA	NA	NA	NA	NA	NA	NA	NA	NA	NA	NA	NA	NA	-0.00016877	NA	NA	NA	NA	NA	NA	NA	NA	NA	NA	NA	NA	NA	NA	NA	NA	NA	NA	NA	1	0	1	1
chr11:67441862-67441965	CORO1B	NA	NA	NA	NA	-0.111751	NA	-0.599619	NA	NA	NA	NA	NA	NA	-0.138735	NA	NA	NA	NA	NA	NA	NA	NA	NA	NA	NA	NA	NA	-0.406765	NA	-0.0344938	NA	NA	NA	1	0	1	5
chr11:67393790-67395715	RAD9A	NA	NA	NA	NA	NA	NA	NA	NA	NA	NA	NA	NA	NA	-0.00252355	NA	NA	NA	NA	NA	NA	NA	NA	NA	NA	NA	NA	NA	NA	NA	NA	NA	NA	NA	1	0	1	1
chr12:119674057-119674339	PRKAB1	NA	NA	NA	NA	NA	NA	NA	NA	NA	NA	NA	NA	NA	-0.310969	NA	-0.00652909	NA	NA	NA	NA	NA	NA	NA	NA	NA	NA	NA	NA	NA	NA	NA	NA	NA	1	0	1	2
chr3:170357763-170359698	SKIL	NA	-0.521802	0.110806	0.236316	0.374212	NA	NA	0.115344	NA	-0.0905678	NA	0.0510973	NA	NA	0.00344444	NA	-0.381743	0.593854	-0.0863185	-0.138224	-0.10292	NA	NA	NA	NA	NA	-0.678221	-0.0892505	NA	NA	NA	NA	NA	0	1	1	15
chr11:47171800-47172280	ARFGAP2	NA	NA	NA	NA	NA	NA	NA	NA	NA	NA	NA	NA	NA	-0.0170311	NA	NA	NA	NA	NA	NA	NA	NA	NA	NA	NA	NA	NA	NA	NA	NA	NA	NA	NA	1	0	1	1
chr14:50324116-50325608	DMAC2L	NA	NA	-0.0263183	NA	NA	NA	NA	0.843249	NA	NA	-0.408707	-0.341376	0.0359741	-0.101845	0.1769	NA	NA	NA	NA	-0.180714	NA	NA	-0.568218	NA	NA	NA	0.299472	NA	0.514097	NA	NA	NA	NA	1	1	2	11
chr2:70216292-70216403	TIA1	NA	NA	NA	NA	NA	NA	NA	NA	NA	NA	NA	NA	NA	-0.0468012	NA	NA	NA	NA	NA	NA	NA	NA	NA	NA	NA	NA	NA	NA	NA	NA	NA	NA	NA	1	0	1	1
chr2:101869797-101870294	MAP4K4	NA	NA	NA	NA	NA	NA	NA	NA	NA	NA	NA	NA	NA	-0.00650978	NA	NA	NA	NA	NA	NA	NA	NA	NA	NA	NA	NA	NA	NA	NA	NA	NA	NA	NA	1	0	1	1
chr12:120552698-120554717	RNF10	NA	NA	NA	NA	NA	NA	NA	NA	NA	NA	NA	NA	NA	-0.00129416	NA	NA	NA	NA	NA	NA	NA	NA	NA	NA	NA	NA	NA	NA	NA	NA	NA	NA	NA	1	0	1	1
chr17:44322552-44322807	SLC25A39	NA	NA	NA	NA	NA	NA	NA	NA	NA	NA	NA	NA	NA	-0.00074273	NA	NA	NA	NA	NA	NA	NA	NA	NA	NA	NA	NA	NA	NA	NA	NA	NA	NA	NA	1	0	1	1
chr2:24077761-24079443	TP53I3	NA	NA	NA	NA	NA	NA	NA	NA	NA	NA	NA	NA	NA	-0.0199924	NA	NA	NA	NA	NA	NA	NA	NA	NA	NA	NA	NA	NA	NA	NA	NA	NA	NA	NA	1	0	1	1
chr1:52911653-52911722	ECHDC2	NA	NA	NA	NA	NA	NA	NA	0.13527	NA	NA	NA	NA	NA	NA	NA	NA	NA	NA	NA	NA	NA	NA	NA	NA	NA	NA	0.0200952	NA	NA	NA	NA	NA	NA	0	1	1	2
chr19:41397935-41410636	BCKDHA	NA	NA	NA	NA	NA	NA	NA	NA	NA	NA	NA	NA	NA	-0.0200438	NA	NA	NA	NA	NA	NA	NA	NA	NA	NA	NA	NA	NA	NA	NA	NA	NA	NA	NA	1	0	1	1
chr1:35188090-35189002	SFPQ	NA	NA	NA	NA	NA	NA	NA	NA	NA	NA	NA	NA	NA	-0.00236764	NA	NA	NA	NA	NA	NA	NA	NA	NA	NA	NA	NA	NA	NA	NA	NA	NA	NA	NA	1	0	1	1
chr20:49243703-49243815	DDX27	NA	NA	NA	NA	NA	NA	NA	NA	NA	NA	NA	NA	NA	-0.012279	NA	NA	NA	NA	NA	NA	NA	NA	NA	NA	NA	NA	NA	NA	NA	NA	NA	NA	NA	1	0	1	1
chr19:58549650-58549736	TRIM28	NA	NA	NA	NA	NA	NA	NA	NA	NA	NA	NA	NA	NA	-0.0311706	NA	NA	NA	NA	NA	NA	NA	NA	NA	NA	NA	NA	NA	NA	NA	NA	NA	NA	NA	1	0	1	1
chr3:47007910-47008069	NBEAL2	NA	0.410089	0.391471	NA	-0.720283	-0.672531	NA	-0.263442	NA	NA	NA	0.795369	NA	-0.0237142	NA	NA	0.662183	0.320199	NA	NA	NA	NA	NA	-0.0749382	NA	NA	0.0677386	NA	NA	NA	NA	NA	NA	1	0	1	11
chr19:8390456-8399862	RAB11B	NA	NA	NA	NA	NA	NA	NA	NA	NA	NA	NA	NA	NA	-0.0071695	NA	NA	NA	NA	NA	NA	NA	NA	NA	NA	NA	NA	NA	NA	NA	NA	NA	NA	NA	1	0	1	1
chr19:15456248-15456501	RASAL3	NA	NA	NA	NA	NA	NA	0.711677	-0.829492	NA	NA	NA	0.00097861	NA	-0.0259349	NA	NA	0.62646	NA	-0.23009	NA	NA	NA	NA	NA	NA	NA	-0.176405	0.606094	NA	-0.357311	NA	NA	NA	1	1	2	9
chr17:38777800-38778333	PIP4K2B	NA	NA	NA	NA	NA	NA	NA	NA	NA	NA	NA	NA	NA	-0.00843514	NA	NA	NA	NA	NA	NA	NA	NA	NA	NA	NA	NA	NA	NA	NA	NA	NA	NA	NA	1	0	1	1
chr11:65617509-65617610	PCNX3	NA	NA	NA	NA	NA	NA	NA	0.528549	0.63502	NA	NA	NA	NA	-0.00378109	NA	NA	NA	-0.022837	NA	-0.0329672	NA	NA	NA	NA	NA	NA	0.0846071	NA	NA	NA	NA	NA	NA	3	0	3	6
chr22:50248145-50248224	HDAC10	-0.0869404	0.201129	-0.0690451	0.150946	-0.0770622	-0.447623	0.108656	0.238401	-0.546998	-0.489864	NA	0.00068983	-0.147203	-7.168e-05	0.257318	-0.096292	-0.114481	-0.145606	-0.749476	-0.482348	-0.0831906	0.998853	0.161436	-0.00216104	-0.38485	0.0961505	-0.206663	0.628299	0.0401178	-0.355825	0.98614	-0.841907	-0.0525394	2	2	4	32
chr19:3639016-3641704	PIP5K1C	NA	NA	NA	NA	NA	NA	NA	NA	NA	NA	NA	NA	NA	-0.00573317	NA	NA	NA	NA	NA	NA	NA	NA	NA	NA	NA	NA	NA	NA	NA	NA	NA	NA	NA	1	0	1	1
chr9:2047484-2054596	SMARCA2	NA	NA	NA	NA	NA	NA	NA	NA	NA	NA	NA	NA	NA	-0.0369057	NA	NA	NA	NA	NA	NA	NA	NA	NA	NA	NA	NA	NA	NA	NA	NA	NA	NA	NA	1	0	1	1
chr22:38087264-38088747	BAIAP2L2	NA	NA	NA	-0.0776264	0.152123	NA	NA	0.83374	NA	NA	NA	0.182732	0.269808	NA	NA	NA	NA	-0.482906	NA	-0.0322758	-0.156273	NA	NA	NA	NA	NA	0.216414	0.477177	NA	NA	NA	NA	NA	1	0	1	10
chr22:41252991-41254307	RANGAP1	NA	NA	NA	NA	NA	NA	NA	NA	NA	NA	NA	NA	NA	-0.00805887	NA	NA	NA	NA	NA	NA	NA	NA	NA	NA	NA	NA	NA	NA	NA	NA	NA	NA	NA	1	0	1	1
chr8:38279681-38281499	NSD3	NA	NA	-0.0466123	NA	NA	NA	NA	-0.365302	NA	NA	NA	-0.309438	NA	-0.256743	-0.145867	NA	NA	-0.0937421	NA	NA	NA	NA	NA	NA	NA	NA	0.108386	NA	NA	NA	NA	NA	NA	1	0	1	7
chr20:10644384-10644862	JAG1	NA	-0.0006769	NA	0.689264	0.377621	NA	NA	-0.887896	-0.0121407	NA	NA	6.08e-06	0.3309	-0.19492	NA	NA	NA	-0.366619	NA	-0.764313	-0.287862	NA	NA	NA	0.680284	NA	-0.355751	NA	NA	NA	NA	NA	NA	2	1	3	13
chr14:58361042-58364169	ARID4A	NA	NA	NA	NA	NA	NA	NA	NA	NA	NA	NA	NA	NA	-0.0183704	NA	NA	NA	NA	NA	NA	NA	NA	NA	NA	NA	NA	NA	NA	NA	NA	NA	NA	NA	1	0	1	1
chr12:6592057-6592392	CHD4	NA	NA	NA	NA	NA	NA	NA	NA	NA	NA	NA	NA	NA	-0.0280627	NA	NA	NA	NA	NA	NA	NA	NA	NA	NA	NA	NA	NA	NA	NA	NA	NA	NA	NA	1	0	1	1
chr6:26465973-26466061	BTN2A1	NA	-0.110274	-0.504405	-0.445428	NA	0.0277977	-0.249313	0.0974266	-0.25789	NA	NA	0.0929546	NA	-0.778783	NA	NA	-0.606213	-0.350301	NA	-0.428946	-0.298212	NA	NA	-0.716182	0.941917	-0.33136	-0.245722	NA	NA	NA	NA	0.774661	NA	0	1	1	18
chr14:24268198-24268368	RABGGTA	0.331223	-0.0298657	NA	NA	NA	NA	0.337003	0.223322	-0.0899172	NA	NA	0.274556	-0.577949	0.997996	0.134976	NA	-0.641211	-0.383461	-0.15804	0.22147	0.182036	-0.380013	NA	0.128114	-0.113885	0.505795	0.105127	NA	0.156626	-0.134385	NA	0.708109	NA	1	0	1	22
chr19:44809206-44811224	BCAM	NA	NA	NA	NA	NA	NA	NA	0.00458817	NA	NA	NA	NA	NA	NA	NA	NA	NA	NA	NA	NA	NA	NA	NA	NA	NA	NA	NA	NA	NA	NA	NA	NA	NA	0	1	1	1
chr1:156134528-156134804	LMNA	NA	NA	NA	NA	NA	NA	NA	NA	NA	NA	NA	NA	NA	-0.00345336	NA	NA	NA	NA	NA	NA	NA	NA	NA	NA	NA	NA	NA	NA	NA	NA	NA	NA	NA	1	0	1	1
chr16:69568548-69626402	NFAT5	NA	NA	NA	NA	NA	NA	NA	NA	NA	NA	NA	NA	NA	-0.00588094	NA	NA	NA	NA	NA	NA	NA	NA	NA	NA	NA	NA	NA	NA	NA	NA	NA	NA	NA	1	0	1	1
chr17:74743340-74744307	RAB37	NA	NA	NA	NA	NA	NA	NA	NA	NA	NA	NA	NA	NA	-0.00564511	NA	NA	NA	NA	NA	NA	NA	NA	NA	NA	NA	NA	NA	NA	NA	NA	NA	NA	NA	1	0	1	1
chr4:2258011-2261724	MXD4	NA	NA	NA	NA	NA	NA	NA	NA	NA	NA	NA	NA	NA	-0.0134581	NA	NA	NA	NA	NA	NA	NA	NA	NA	NA	NA	NA	NA	NA	NA	NA	NA	NA	NA	1	0	1	1
chr6:3089657-3104224	RIPK1	NA	NA	NA	NA	NA	NA	NA	NA	NA	NA	NA	NA	NA	-0.00553474	NA	NA	NA	NA	NA	NA	NA	NA	NA	NA	NA	NA	NA	NA	NA	NA	NA	NA	NA	1	0	1	1
chr9:443516-446369	DOCK8	NA	NA	NA	NA	NA	NA	NA	NA	NA	NA	NA	NA	NA	-0.0483523	NA	NA	NA	NA	NA	NA	NA	NA	NA	NA	NA	NA	NA	NA	NA	NA	NA	NA	NA	1	0	1	1
chr7:139279360-139282004	UBN2	NA	NA	NA	NA	NA	NA	NA	0.167967	NA	NA	NA	NA	NA	-0.00137549	NA	NA	NA	NA	NA	NA	NA	NA	NA	NA	NA	NA	NA	NA	NA	NA	NA	NA	NA	1	0	1	2
chr19:18768793-18771441	CRTC1	-0.11403	NA	-0.703469	NA	-0.729195	NA	NA	-0.793089	-0.338147	NA	0.978405	0.230001	-0.543469	-0.033399	0.00018832	NA	-0.27641	-0.262009	0.0692972	-0.516027	-0.528199	0.171979	0.0188733	NA	NA	-0.484482	0.139825	-0.158714	0.156941	-0.176323	NA	-0.206781	-0.632863	1	2	3	24
chr15:31046233-31047110	TRPM1	NA	NA	NA	NA	NA	NA	NA	NA	NA	NA	NA	NA	NA	NA	NA	NA	NA	NA	NA	NA	NA	NA	NA	NA	NA	NA	NA	NA	NA	NA	NA	NA	0.014562	0	1	1	1
chr6:131950543-131950769	CCN2	NA	NA	NA	NA	NA	0.0352159	NA	-0.0321998	-0.594089	NA	NA	0.0190927	NA	NA	-0.264956	NA	-0.078202	-0.410319	-0.893974	-0.234063	NA	0.999399	NA	-0.121429	0.988862	NA	NA	NA	-0.138654	0.598183	NA	-0.215921	NA	1	2	3	15
chr12:57106580-57106692	STAT6	NA	NA	NA	NA	NA	NA	NA	NA	NA	NA	NA	NA	NA	-0.00207676	NA	NA	NA	NA	NA	NA	NA	NA	NA	NA	NA	NA	NA	NA	NA	NA	NA	NA	NA	1	0	1	1
chr18:50271540-50272676	MBD1	-0.511161	-0.131392	0.276842	0.415099	-0.287929	0.00128442	0.766917	0.38554	0.199171	-0.0734012	-0.731819	-0.0582025	-0.424367	-0.0479385	0.583517	-0.0083373	-0.0580606	0.718034	0.178685	0.29382	-0.184935	0.661731	0.0922541	-0.298466	0.700214	0.0442521	0.597402	-0.385018	0.458592	-0.454977	NA	-0.388781	-0.19087	2	2	4	32
chr10:80504778-80507227	TSPAN14	NA	NA	NA	NA	NA	NA	NA	NA	NA	NA	NA	NA	NA	-0.0135745	NA	NA	NA	NA	NA	NA	NA	NA	NA	NA	NA	NA	NA	NA	NA	NA	NA	NA	NA	1	0	1	1
chr13:28220378-28256291	PAN3	NA	NA	NA	NA	NA	NA	NA	NA	NA	NA	NA	NA	NA	-4.319e-05	NA	NA	NA	NA	NA	NA	NA	NA	NA	NA	NA	NA	NA	NA	NA	NA	NA	NA	NA	1	0	1	1
chr1:35387278-35387453	ZMYM4	NA	NA	NA	NA	NA	NA	NA	NA	NA	NA	NA	NA	NA	-0.00169373	NA	NA	NA	NA	NA	NA	NA	NA	NA	NA	NA	NA	NA	NA	NA	NA	NA	NA	NA	1	0	1	1
chr11:72705890-72707174	ARAP1	NA	NA	NA	NA	NA	NA	NA	NA	NA	NA	NA	NA	NA	-0.0202025	NA	NA	NA	NA	NA	NA	NA	NA	NA	NA	NA	NA	NA	NA	NA	NA	NA	NA	NA	1	0	1	1
chr16:67942766-67942860	LCAT	NA	NA	NA	NA	NA	NA	NA	0.419196	NA	NA	NA	-0.225046	NA	-0.592702	NA	NA	NA	NA	NA	0.758799	NA	NA	NA	NA	NA	NA	-0.0441162	NA	NA	NA	NA	NA	NA	1	0	1	5
chr1:46189357-46189457	POMGNT1	NA	-0.017308	-0.504523	-0.308487	-0.301752	0.0553726	-0.39207	0.165463	-0.812432	NA	NA	0.0276975	0.266082	-0.980869	NA	0.280692	-0.365086	-0.312336	NA	0.138805	0.44215	NA	0.0274541	-0.37272	NA	NA	-0.133597	0.738075	NA	-0.172474	0.259873	-0.278402	NA	1	2	3	23
chr7:2525318-2525413	LFNG	NA	-0.179085	-0.332181	-0.626431	0.895915	0.052844	NA	0.114874	0.78776	-0.674402	NA	0.0476206	0.258358	-0.0580407	0.52259	NA	0.669806	-0.662967	-0.720835	0.126968	-0.0299817	NA	0.085255	-0.401579	-0.057405	NA	0.40008	-0.211289	NA	0.493159	-0.187911	0.436297	NA	1	1	2	25
chr19:10796199-10798485	DNM2	NA	NA	NA	NA	NA	NA	NA	NA	NA	NA	NA	NA	NA	-0.00468398	NA	NA	NA	NA	NA	NA	NA	NA	NA	NA	NA	NA	NA	NA	NA	NA	NA	NA	NA	1	0	1	1
chr12:120162971-120163069	GCN1	NA	NA	NA	NA	NA	NA	NA	NA	NA	NA	NA	NA	NA	-0.00763814	NA	NA	NA	NA	NA	NA	NA	NA	NA	NA	NA	NA	NA	NA	NA	NA	NA	NA	NA	1	0	1	1
chr5:177366355-177366707	RGS14	NA	NA	NA	NA	NA	NA	NA	NA	NA	NA	NA	NA	NA	-0.00210644	NA	NA	NA	NA	NA	NA	NA	NA	NA	NA	NA	NA	NA	NA	NA	NA	NA	NA	NA	1	0	1	1
chr3:38139998-38140387	MYD88	NA	NA	NA	NA	NA	NA	NA	NA	NA	NA	NA	NA	NA	-0.00091317	NA	NA	NA	NA	NA	NA	NA	NA	NA	NA	NA	NA	NA	NA	NA	NA	NA	NA	NA	1	0	1	1
chr9:131598310-131602060	RAPGEF1	NA	NA	NA	NA	NA	NA	NA	NA	NA	NA	NA	NA	NA	-0.00366323	NA	NA	NA	NA	NA	NA	NA	NA	NA	NA	NA	NA	NA	NA	NA	NA	NA	NA	NA	1	0	1	1
chr6:29725563-29726010	HLA-F	-0.0980212	-0.00030917	NA	NA	-0.688075	NA	NA	NA	NA	NA	NA	0.00144869	0.581191	-0.155795	-0.0226048	NA	0.297109	0.455598	0.330334	NA	-0.0725385	0.183618	0.00681339	NA	0.0761031	NA	NA	-0.479093	NA	-0.301359	NA	NA	NA	2	2	4	16
chr8:133040130-133044983	SLA	NA	NA	NA	NA	NA	NA	NA	NA	NA	NA	NA	NA	NA	-0.0415247	NA	NA	NA	NA	NA	NA	NA	NA	NA	NA	NA	NA	0.305782	NA	NA	NA	NA	NA	NA	1	0	1	2
chr1:145912566-145916816	PEX11B	NA	NA	NA	NA	NA	NA	NA	-0.570418	NA	NA	NA	NA	NA	-0.00596881	NA	NA	NA	NA	NA	NA	NA	NA	NA	NA	NA	NA	NA	NA	NA	NA	NA	NA	NA	1	0	1	2
chr17:42564898-42564982	COASY	-0.0362968	-0.165301	NA	-0.100811	-0.317105	0.309752	-0.476851	NA	0.363235	NA	NA	0.241181	0.617022	-0.0561526	0.510916	NA	-0.4011	-0.02652	NA	NA	-0.116009	-0.998852	NA	-0.255061	0.258754	0.0264489	NA	-0.537576	NA	-0.462871	0.921051	-0.0489002	-0.222425	3	1	4	23
chr7:44757149-44757377	ZMIZ2	NA	NA	NA	NA	NA	NA	NA	NA	NA	NA	NA	NA	NA	-0.0177327	NA	NA	NA	NA	NA	NA	NA	NA	NA	NA	NA	NA	NA	NA	NA	NA	NA	NA	NA	1	0	1	1
chr13:98002591-98002683	IPO5	NA	-0.730485	-0.198833	0.208289	0.0707134	0.642629	NA	0.490591	0.0459936	NA	NA	NA	NA	-0.728801	0.775443	NA	-0.0687993	-0.498105	NA	-0.218004	NA	NA	NA	NA	-0.516308	NA	0.709091	-0.761578	NA	NA	NA	NA	NA	0	1	1	15
chr15:68183667-68187541	PIAS1	NA	NA	NA	NA	0.357334	NA	NA	NA	NA	NA	NA	0.00022816	NA	-0.00041909	NA	NA	-0.219361	-0.261048	NA	NA	-0.259535	NA	NA	NA	NA	NA	NA	NA	NA	NA	NA	NA	NA	1	1	2	6
chr2:9420100-9422478	ITGB1BP1	NA	NA	NA	NA	NA	NA	NA	-0.269085	0.394565	NA	NA	0.165351	NA	-0.114352	NA	NA	NA	NA	0.0253201	-0.0693074	NA	NA	NA	NA	NA	0.340829	-0.484225	NA	-0.453761	NA	NA	NA	-0.2451	0	1	1	10
chr10:110122292-110124016	ADD3	NA	NA	NA	NA	NA	NA	NA	0.20049	NA	NA	NA	0.0006444	NA	-0.298383	NA	NA	NA	0.788095	NA	NA	-0.224481	NA	NA	NA	NA	NA	0.583976	-0.401086	0.458261	NA	NA	NA	NA	0	1	1	8
chr22:38067770-38069032	PICK1	NA	-0.065286	NA	0.443585	0.141343	NA	NA	0.127527	NA	NA	NA	0.00268685	-0.0186736	-0.542237	NA	NA	-0.496534	-0.78317	NA	-0.746174	0.500041	NA	NA	NA	NA	NA	0.448692	NA	0.117685	NA	NA	NA	NA	1	1	2	13
chrX:118683217-118685687	DOCK11	NA	NA	NA	NA	NA	NA	NA	NA	NA	NA	NA	NA	NA	-0.0384418	NA	NA	NA	NA	NA	NA	NA	NA	NA	NA	NA	NA	NA	NA	NA	NA	NA	NA	NA	1	0	1	1
chr19:17579609-17580698	COLGALT1	0.427483	-0.00025776	-0.0873311	-0.031181	-0.411072	0.0296537	0.0571912	0.332542	0.702634	NA	-0.277184	0.0109416	-0.325622	-0.00356435	-0.0376579	-0.178039	-0.495286	-0.74935	-0.0270035	-0.0734266	-0.04299	-0.349407	0.0251158	0.0282163	-0.350401	0.728561	0.245061	-0.359587	-0.209317	0.198511	-0.560325	-0.0620343	0.28271	6	4	10	32
chr17:18236939-18237480	LLGL1	NA	NA	NA	NA	NA	NA	NA	0.463945	NA	NA	NA	NA	NA	-0.00508477	NA	NA	NA	NA	NA	0.62878	NA	NA	NA	NA	NA	NA	0.176578	0.433486	NA	NA	NA	NA	NA	1	0	1	5
chr15:64678482-64680184	ZNF609	NA	NA	NA	NA	NA	NA	NA	NA	NA	NA	NA	NA	NA	-0.00838132	NA	NA	NA	NA	NA	NA	NA	NA	NA	NA	NA	NA	NA	NA	NA	NA	NA	NA	NA	1	0	1	1
chr3:3151045-3152455	CRBN	0.758347	-0.0129955	-0.36914	-0.130148	0.718543	0.545672	-0.489034	-0.567181	0.179263	0.851816	0.281584	0.00115953	0.0595631	-0.116371	-0.687787	0.0242685	-0.594781	-0.0395712	-0.141378	-0.54756	-0.0730677	-0.41776	0.027198	-0.310414	0.0908754	0.107361	-0.221578	0.36252	0.424868	-0.231575	0.882131	-0.250529	0.351984	2	3	5	33
chr12:32737161-32740063	DNM1L	0.239889	-0.00026723	-0.107798	0.0679084	0.484284	0.00862087	0.249864	0.124855	-0.207389	NA	-0.10964	0.00020466	0.555026	-0.144355	0.381801	-0.0108921	-0.509672	-0.294711	0.185286	0.223364	-0.0210099	0.690734	0.0697598	0.235192	-0.46985	0.337044	-0.268992	0.367169	0.948976	-0.228199	NA	-0.11095	-0.187328	3	2	5	31
chr1:27364394-27364660	MAP3K6	NA	NA	NA	0.352485	NA	NA	NA	0.378747	NA	NA	NA	0.0314176	NA	NA	NA	NA	-0.214766	0.0476732	NA	NA	NA	NA	NA	NA	NA	NA	0.314718	NA	NA	NA	NA	NA	NA	0	2	2	6
chr22:20056013-20061529	TANGO2	NA	NA	NA	NA	NA	NA	NA	0.472908	NA	NA	NA	0.0159517	NA	-0.53585	NA	NA	-0.276096	0.719668	NA	-0.380007	NA	NA	NA	NA	NA	NA	0.5784	NA	NA	NA	NA	NA	NA	0	1	1	7
chr1:30995220-31005852	PUM1	NA	NA	NA	NA	NA	NA	NA	NA	NA	NA	NA	NA	NA	-0.035103	NA	NA	NA	NA	NA	NA	NA	NA	NA	NA	NA	NA	NA	NA	NA	NA	NA	NA	NA	1	0	1	1
chr2:70227822-70229058	TIA1	-0.297441	-0.0481913	-0.541	0.0661024	0.394244	0.19	0.7591	0.102025	0.965304	0.315451	-0.679418	-0.0653269	-0.318597	-0.126044	-2.5e-07	NA	0.209453	-0.544349	-0.0569585	0.637354	-0.758479	0.23966	0.0461316	0.0457749	-0.354268	0.617492	-0.169629	-0.0828466	0.598796	-0.330789	-0.294152	-0.16312	NA	2	2	4	31
chr8:23029721-23030758	TNFRSF10B	NA	NA	NA	NA	NA	NA	NA	NA	NA	NA	NA	0.0385657	NA	-0.859014	NA	NA	NA	NA	NA	NA	NA	NA	NA	NA	NA	NA	NA	NA	NA	NA	NA	NA	NA	0	1	1	2
chr1:114407100-114408676	TRIM33	NA	NA	NA	NA	NA	NA	NA	NA	NA	NA	NA	NA	NA	-0.0289485	NA	NA	NA	NA	NA	NA	NA	NA	NA	NA	NA	NA	NA	NA	NA	NA	NA	NA	NA	1	0	1	1
chr2:32089605-32098795	SPAST	NA	NA	NA	NA	NA	NA	NA	NA	NA	NA	NA	NA	NA	-0.0230855	NA	NA	NA	NA	NA	NA	NA	NA	NA	NA	NA	NA	NA	NA	NA	NA	NA	NA	NA	1	0	1	1
chr1:19326623-19327226	SLC66A1	NA	NA	NA	NA	NA	NA	NA	NA	NA	NA	NA	NA	NA	-0.0477492	NA	NA	NA	NA	NA	NA	NA	NA	NA	NA	NA	NA	NA	NA	NA	NA	NA	NA	NA	1	0	1	1
chr5:172083084-172090231	STK10	NA	NA	NA	NA	NA	NA	NA	NA	NA	NA	NA	NA	NA	-0.00031118	NA	NA	NA	NA	NA	NA	NA	NA	NA	NA	NA	NA	NA	NA	NA	NA	NA	NA	NA	1	0	1	1
chr9:137180527-137180787	ANAPC2	NA	NA	NA	NA	NA	NA	NA	-0.594202	NA	NA	NA	NA	NA	-0.0260974	NA	NA	NA	-0.585643	NA	NA	NA	NA	NA	NA	NA	NA	0.220597	NA	NA	NA	NA	NA	NA	1	0	1	4
chr17:7910591-7910846	CHD3	NA	NA	NA	NA	NA	NA	NA	NA	NA	NA	NA	NA	NA	-0.0251348	NA	NA	NA	NA	NA	NA	NA	NA	NA	NA	NA	NA	-0.10731	NA	NA	NA	NA	NA	NA	1	0	1	2
chrX:129788070-129788430	SASH3	NA	NA	NA	NA	NA	NA	-0.689419	NA	NA	NA	NA	NA	NA	-0.0146684	NA	NA	NA	NA	NA	NA	NA	NA	NA	NA	NA	NA	NA	NA	NA	0.302522	NA	NA	NA	1	0	1	3
chr8:26338987-26354467	PPP2R2A	NA	NA	NA	NA	NA	NA	NA	NA	NA	NA	NA	NA	NA	-0.00658017	NA	NA	NA	NA	NA	NA	NA	NA	NA	NA	NA	NA	NA	NA	NA	NA	NA	NA	NA	1	0	1	1
chr14:20448811-20448963	OSGEP	0.0353336	0.0488807	NA	NA	-0.52617	0.0328845	NA	0.132452	0.716594	NA	NA	NA	-0.0751746	-0.11762	0.263142	NA	NA	-0.0928258	NA	-0.0938585	-0.013454	0.469266	NA	0.387143	-0.535669	NA	NA	-0.547176	NA	NA	NA	-0.355033	NA	1	3	4	17
chr17:13002579-13003478	ELAC2	NA	NA	NA	NA	NA	NA	NA	NA	NA	NA	NA	NA	NA	-0.00540121	NA	NA	NA	NA	NA	NA	NA	NA	NA	NA	NA	NA	NA	NA	NA	NA	NA	NA	NA	1	0	1	1
chr3:49028806-49029252	IMPDH2	0.205499	-0.142759	NA	NA	-0.353089	NA	NA	-0.300695	NA	NA	NA	0.0608062	-0.137575	-0.118146	2.413e-05	-0.0199678	NA	NA	NA	NA	NA	-0.257718	NA	NA	-0.2054	-0.34119	NA	NA	NA	0.248296	-0.286987	NA	NA	1	1	2	14
chr17:76061219-76061491	SRP68	NA	NA	NA	NA	NA	NA	NA	NA	NA	NA	NA	NA	NA	-0.0170037	NA	NA	NA	NA	NA	NA	NA	NA	NA	NA	NA	NA	NA	NA	NA	NA	NA	NA	NA	1	0	1	1
chr16:67882109-67882211	EDC4	NA	NA	NA	NA	NA	NA	NA	NA	NA	NA	NA	NA	NA	-0.00262243	NA	NA	NA	NA	NA	NA	NA	NA	NA	NA	NA	NA	NA	NA	NA	NA	NA	NA	NA	1	0	1	1
chr2:169584490-169603641	PPIG	NA	NA	NA	NA	NA	NA	NA	NA	NA	NA	NA	NA	NA	-0.00201077	NA	NA	NA	NA	NA	NA	NA	NA	NA	NA	NA	NA	NA	NA	NA	NA	NA	NA	NA	1	0	1	1
chr3:52402871-52403137	BAP1	NA	-0.169949	NA	-0.364381	0.257968	NA	0.765176	NA	NA	NA	NA	0.0055857	-0.289326	0.933997	NA	0.802329	0.589418	0.314666	0.155121	NA	-0.441896	NA	NA	NA	NA	NA	0.532415	-0.634928	NA	0.579278	0.845757	NA	0.334334	0	1	1	17
chr22:50574419-50574492	CPT1B	NA	0.0676454	0.198446	-0.401407	0.999393	NA	NA	0.537648	NA	NA	NA	-0.491292	0.228555	0.58265	NA	NA	NA	-0.246176	NA	0.0508419	0.997896	NA	NA	NA	NA	NA	0.247663	NA	-0.0248368	NA	NA	NA	NA	1	0	1	13
chr17:8454887-8460008	NDEL1	NA	NA	NA	NA	NA	NA	NA	NA	NA	NA	NA	NA	NA	-0.0128698	NA	NA	NA	NA	NA	NA	NA	NA	NA	NA	NA	NA	NA	NA	NA	NA	NA	NA	NA	1	0	1	1
chr17:76725855-76726346	JMJD6	0.451035	NA	NA	NA	NA	NA	NA	NA	-0.383763	NA	NA	NA	NA	-0.00115734	NA	NA	NA	NA	NA	NA	NA	NA	NA	NA	NA	NA	NA	NA	NA	NA	NA	NA	NA	1	0	1	3
chr10:97462119-97462582	MMS19	NA	NA	NA	NA	NA	NA	NA	NA	NA	NA	NA	NA	NA	-0.0265364	NA	NA	0.148465	NA	NA	NA	NA	NA	NA	NA	NA	NA	0.294456	NA	NA	NA	NA	NA	NA	1	0	1	3
chr1:86354859-86356443	ODF2L	NA	-0.145948	-0.623028	0.00984065	0.615832	NA	NA	0.105319	NA	NA	NA	0.373735	-0.697076	-0.641071	NA	NA	0.343392	-0.530297	0.43633	0.29815	0.495457	NA	NA	NA	NA	-0.0108412	-0.749163	-0.743334	0.165052	-0.58607	NA	0.463678	NA	1	1	2	19
chr18:74155207-74155305	TIMM21	-0.0985118	-0.145328	-0.0433981	0.672842	-0.313053	NA	-0.575917	0.398927	0.523462	-0.491401	NA	0.00450728	0.296305	-0.652601	0.251924	0.310956	-0.10768	0.403774	0.633004	-0.058064	-0.629963	-0.540276	0.193389	NA	-0.235205	0.424489	-0.198536	-0.608297	-0.173815	-0.0867792	-0.347248	0.638528	-0.120598	1	1	2	30
chr6:41785540-41786127	PRICKLE4	NA	NA	NA	NA	NA	NA	NA	NA	-0.10788	NA	NA	NA	NA	NA	-0.0285006	NA	NA	NA	NA	-0.464564	NA	NA	NA	NA	NA	NA	NA	NA	-0.843985	-0.360592	NA	NA	NA	1	0	1	5
chr1:156266678-156267469	SMG5	NA	NA	NA	NA	NA	NA	NA	NA	NA	NA	NA	NA	NA	-0.0039777	NA	NA	NA	NA	NA	NA	NA	NA	NA	NA	NA	NA	NA	NA	NA	NA	NA	NA	NA	1	0	1	1
chr5:178213103-178214795	PHYKPL	NA	NA	NA	NA	NA	NA	NA	-0.562819	NA	NA	NA	NA	NA	-0.00563705	NA	NA	NA	NA	NA	NA	NA	NA	NA	NA	NA	NA	NA	NA	NA	NA	NA	NA	NA	1	0	1	2
chr5:138428086-138429825	KDM3B	NA	NA	NA	NA	NA	NA	NA	NA	NA	NA	NA	NA	NA	-0.0111721	NA	NA	NA	NA	NA	NA	NA	NA	NA	NA	NA	NA	NA	NA	NA	NA	NA	NA	NA	1	0	1	1
chr11:57808292-57808389	CTNND1	NA	-0.806087	NA	NA	NA	NA	NA	NA	NA	NA	NA	NA	-0.0390728	-0.29117	NA	NA	NA	NA	NA	NA	NA	NA	NA	NA	NA	NA	NA	NA	NA	NA	NA	NA	NA	1	0	1	3
chrX:48923746-48923850	OTUD5	NA	NA	NA	NA	NA	NA	NA	NA	NA	NA	NA	NA	NA	-0.0090999	NA	NA	NA	NA	NA	NA	NA	NA	NA	NA	NA	NA	NA	NA	NA	NA	NA	NA	NA	1	0	1	1
chr15:66481879-66484989	MAP2K1	NA	NA	NA	NA	NA	NA	NA	NA	NA	NA	NA	NA	NA	-0.00235475	NA	NA	NA	NA	NA	NA	NA	NA	NA	NA	NA	NA	NA	NA	NA	NA	NA	NA	NA	1	0	1	1
chr17:8264601-8264894	PFAS	NA	NA	NA	NA	NA	NA	NA	0.327263	NA	NA	NA	NA	NA	-0.0373196	NA	NA	NA	NA	NA	NA	NA	NA	NA	NA	NA	NA	NA	-0.106939	NA	NA	NA	NA	NA	1	0	1	3
chr3:47729094-47736033	SMARCC1	NA	NA	NA	NA	NA	NA	NA	NA	NA	NA	NA	NA	NA	-0.0210309	NA	NA	NA	NA	NA	NA	NA	NA	NA	NA	NA	NA	NA	NA	NA	NA	NA	NA	NA	1	0	1	1
chr6:43778918-43781955	VEGFA	NA	-0.00760061	0.338497	0.201259	-0.798697	0.0212782	NA	-0.678978	NA	-0.118823	NA	0.0232555	-0.0960371	NA	NA	-0.00650971	-0.00346601	0.375409	0.200364	0.223489	0.971898	NA	0.389069	-0.0365335	0.0857274	0.265248	0.227784	-0.113566	0.369114	NA	0.0368669	NA	NA	4	3	7	23
chr20:46389220-46393092	ELMO2	NA	NA	NA	NA	NA	NA	NA	NA	NA	NA	NA	NA	NA	-0.0218299	NA	NA	NA	NA	NA	NA	NA	NA	NA	NA	NA	NA	NA	NA	NA	NA	NA	NA	NA	1	0	1	1
chr11:44079620-44081019	ACCS	NA	NA	-0.693309	NA	-0.12414	NA	NA	0.830595	-0.303643	NA	0.688853	0.282176	-0.713481	-0.227084	NA	NA	0.0793181	NA	0.0669204	-0.0959638	0.00548145	NA	0.356372	NA	NA	0.0401212	-0.525309	NA	0.100656	-0.289499	NA	NA	-0.653126	0	2	2	18
chr12:40367059-40367643	LRRK2	NA	NA	NA	NA	NA	NA	NA	NA	NA	NA	NA	0.00139969	-0.435699	NA	NA	NA	NA	NA	NA	NA	NA	NA	NA	NA	NA	NA	NA	NA	-0.601909	NA	NA	NA	NA	0	1	1	3
chr11:67248370-67250085	KDM2A	NA	NA	NA	NA	NA	NA	NA	NA	NA	NA	NA	NA	NA	-0.0492758	NA	NA	NA	NA	NA	NA	NA	NA	NA	NA	NA	NA	NA	NA	NA	NA	NA	NA	NA	1	0	1	1
chr16:2856848-2857827	PRSS22	NA	NA	NA	NA	NA	NA	NA	-0.034313	NA	NA	NA	NA	NA	NA	NA	NA	NA	NA	NA	0.346219	-0.806211	NA	NA	NA	NA	NA	-0.447227	NA	NA	NA	NA	NA	NA	1	0	1	4
chr19:1047654-1048894	ABCA7	NA	NA	NA	NA	NA	NA	NA	0.53828	NA	NA	NA	NA	NA	-0.203433	NA	NA	NA	NA	NA	NA	NA	NA	NA	NA	NA	NA	0.0328632	NA	NA	NA	NA	NA	NA	0	1	1	3
chr5:141629739-141629859	HDAC3	0.908403	NA	NA	NA	NA	NA	NA	-0.702729	NA	NA	NA	0.0327108	NA	-0.170129	0.167255	NA	NA	NA	NA	NA	NA	0.819316	NA	NA	NA	NA	NA	NA	NA	NA	NA	NA	NA	0	1	1	6
chr6:26444304-26445703	BTN3A3	NA	NA	0.519896	-0.701533	0.216334	NA	NA	-0.762715	-0.535029	NA	NA	2.584e-05	NA	-0.0667353	NA	NA	0.740665	-0.154106	0.276637	-0.573053	-0.220831	NA	NA	NA	-0.807299	0.228623	0.427775	NA	NA	NA	NA	NA	NA	0	1	1	15
chr1:155203305-155203512	THBS3	NA	-0.105782	-0.0985619	-0.261804	0.553567	NA	NA	0.361727	-0.383202	NA	NA	0.0745129	0.430951	-0.0976367	0.345763	NA	-0.0781408	-0.410284	-0.0965034	-0.34974	-0.0396587	-0.261278	0.197257	NA	-0.335495	-0.0469347	-0.144819	NA	-0.43493	NA	NA	0.523116	-0.0276165	3	0	3	23
chr18:667752-669071	TYMS	NA	NA	NA	-0.255058	NA	NA	NA	-0.579657	NA	NA	NA	NA	NA	NA	NA	NA	NA	NA	NA	-0.15062	NA	NA	NA	NA	NA	NA	NA	-0.0148875	NA	NA	NA	NA	NA	1	0	1	4
chr14:103336849-103337115	EIF5	NA	NA	NA	NA	NA	NA	NA	NA	NA	NA	NA	NA	NA	-0.00659381	NA	NA	NA	NA	NA	NA	NA	NA	NA	NA	NA	NA	NA	NA	NA	NA	NA	NA	NA	1	0	1	1
chr10:13338808-13344757	SEPHS1	NA	NA	NA	NA	NA	NA	NA	NA	NA	NA	NA	NA	NA	-0.017191	NA	NA	NA	NA	NA	NA	NA	NA	NA	NA	NA	NA	NA	NA	NA	NA	NA	NA	NA	1	0	1	1
chr14:57483184-57490941	CCDC198	NA	NA	NA	NA	NA	NA	NA	NA	NA	NA	NA	0.0218697	-0.479922	NA	NA	NA	NA	NA	NA	NA	NA	NA	NA	NA	NA	NA	NA	NA	NA	NA	NA	NA	NA	0	1	1	2
chr15:55230486-55234781	RAB27A	NA	NA	NA	NA	NA	NA	NA	NA	NA	NA	NA	NA	NA	-0.00421752	NA	NA	NA	NA	NA	NA	NA	NA	NA	NA	NA	NA	NA	NA	NA	NA	NA	NA	NA	1	0	1	1
chr17:50388132-50392397	LRRC59	NA	NA	NA	NA	NA	NA	NA	NA	NA	NA	NA	NA	NA	-0.00144357	NA	NA	NA	NA	NA	NA	NA	NA	NA	NA	NA	NA	NA	NA	NA	NA	NA	NA	NA	1	0	1	1
chr5:50411383-50428143	EMB	NA	NA	NA	NA	NA	NA	NA	NA	NA	NA	NA	NA	NA	-0.00865685	NA	NA	NA	NA	NA	NA	NA	NA	NA	NA	NA	NA	NA	NA	NA	NA	NA	NA	NA	1	0	1	1
chr2:38296113-38298143	ATL2	-0.0744452	0.170362	0.138034	0.307582	-0.221619	0.189054	0.623894	0.59086	-0.458196	-0.449919	0.812719	0.00106848	0.138708	-0.547144	-0.393138	-0.198145	-0.421129	0.821718	0.177435	0.212851	-0.411917	-0.770081	0.380625	0.149076	0.224141	0.0507806	-0.187978	-0.333075	0.335977	-0.0048364	0.590968	-0.410864	-0.120137	1	1	2	33
chr9:37768228-37769940	TRMT10B	NA	NA	NA	NA	NA	NA	NA	0.514991	NA	NA	NA	NA	NA	-0.0345925	NA	NA	NA	NA	NA	-0.105421	NA	NA	NA	NA	NA	NA	0.186509	NA	NA	NA	NA	NA	NA	1	0	1	4
chrX:149504293-149505034	IDS	NA	NA	NA	NA	NA	NA	NA	NA	NA	NA	NA	NA	NA	-0.00015178	NA	NA	NA	NA	NA	NA	NA	NA	NA	NA	NA	NA	NA	NA	NA	NA	NA	NA	NA	1	0	1	1
chr14:95418026-95432078	SYNE3	NA	NA	NA	NA	NA	NA	NA	NA	NA	NA	NA	NA	NA	-0.0166626	NA	NA	NA	NA	NA	NA	NA	NA	NA	NA	NA	NA	NA	NA	NA	NA	NA	NA	NA	1	0	1	1
chr16:67238128-67238201	FHOD1	-0.715232	NA	NA	-0.127555	NA	NA	-0.513061	-0.400768	0.532792	NA	NA	0.0189862	NA	-0.265192	NA	NA	0.403419	-0.0929466	NA	-0.180156	-0.31896	NA	NA	NA	NA	0.475018	-0.943788	NA	0.71407	NA	NA	NA	NA	0	1	1	14
chr14:103132872-103133361	TNFAIP2	NA	NA	NA	NA	NA	NA	NA	NA	NA	NA	NA	NA	NA	-0.00889495	NA	NA	NA	NA	NA	NA	NA	NA	NA	NA	NA	NA	NA	NA	NA	NA	NA	NA	NA	1	0	1	1
chr8:124475290-124485830	RNF139	NA	NA	NA	NA	NA	NA	NA	NA	NA	NA	NA	NA	NA	-0.0129937	NA	NA	NA	NA	NA	NA	NA	NA	NA	NA	NA	NA	NA	NA	NA	NA	NA	NA	NA	1	0	1	1
chr8:91071289-91073830	OTUD6B	NA	NA	NA	NA	NA	NA	NA	0.430569	NA	NA	NA	NA	NA	-0.0208175	NA	NA	NA	NA	NA	NA	NA	NA	NA	NA	NA	NA	NA	NA	NA	NA	NA	NA	NA	1	0	1	2
chr2:9493825-9494636	ADAM17	NA	NA	-0.514155	NA	0.621448	NA	NA	0.34506	NA	NA	NA	0.100404	-0.20651	-0.00354954	-0.260062	NA	-0.0813332	NA	NA	NA	NA	NA	NA	NA	NA	NA	0.364645	NA	0.612822	NA	NA	NA	NA	1	0	1	10
chr1:161120232-161120498	NIT1	NA	NA	NA	NA	NA	NA	NA	NA	NA	NA	NA	NA	NA	-0.0348938	NA	NA	NA	NA	NA	NA	NA	NA	NA	NA	NA	NA	NA	NA	NA	NA	NA	NA	NA	1	0	1	1
chr8:38268461-38268822	PLPP5	NA	NA	NA	NA	NA	NA	NA	NA	NA	NA	NA	NA	NA	NA	NA	NA	NA	NA	NA	NA	NA	NA	0.0376659	NA	NA	NA	NA	NA	NA	NA	NA	NA	NA	0	1	1	1
chr22:46912188-46974289	TBC1D22A	NA	NA	NA	NA	NA	NA	NA	NA	NA	NA	NA	NA	NA	-0.00044806	NA	NA	NA	NA	NA	NA	NA	NA	NA	NA	NA	NA	NA	NA	NA	NA	NA	NA	NA	1	0	1	1
chr8:37740446-37741771	ERLIN2	NA	NA	NA	NA	NA	NA	NA	NA	NA	NA	NA	NA	NA	-0.011075	NA	NA	NA	NA	NA	NA	NA	NA	NA	NA	NA	NA	NA	NA	NA	NA	NA	NA	NA	1	0	1	1
chr17:51021365-51031680	SPAG9	NA	NA	NA	NA	NA	NA	NA	NA	NA	NA	NA	NA	NA	-0.00542108	NA	NA	NA	NA	NA	NA	NA	NA	NA	NA	NA	NA	NA	NA	NA	NA	NA	NA	NA	1	0	1	1
chr9:136209275-136211263	QSOX2	NA	NA	NA	-0.00805851	0.526343	0.230087	0.193856	-0.292686	-0.217511	NA	NA	0.0296224	NA	-0.856506	0.507302	NA	0.703723	-0.052877	-0.25733	-0.016616	-0.761417	NA	NA	-0.241024	NA	-0.361518	0.191009	-0.873056	-0.0624831	0.136024	NA	-0.580035	-0.807742	2	1	3	22
chr17:44093834-44110728	HDAC5	NA	NA	NA	NA	NA	NA	NA	NA	NA	NA	NA	NA	NA	-7.951e-05	NA	NA	NA	NA	NA	NA	NA	NA	NA	NA	NA	NA	NA	NA	NA	NA	NA	NA	NA	1	0	1	1
chr12:56323913-56324048	PAN2	-0.113241	0.229228	-0.297799	0.186809	0.182436	0.0934105	NA	-0.28126	-0.27132	NA	0.23235	4.344e-05	-0.586462	-0.264017	0.0443371	0.145319	-0.394692	0.0110459	-0.52532	0.418589	-0.548452	-0.374379	0.61536	0.269393	0.230779	-0.472262	-0.743363	0.929098	-0.733549	0.587054	NA	0.318967	-0.39171	0	3	3	30
chrX:48818109-48818219	HDAC6	NA	NA	NA	NA	NA	NA	NA	NA	NA	NA	NA	NA	NA	-0.0333446	NA	NA	NA	NA	NA	NA	NA	NA	NA	NA	NA	NA	0.331394	NA	NA	NA	NA	NA	NA	1	0	1	2
chr22:32399759-32401746	RTCB	NA	NA	NA	NA	NA	NA	NA	NA	NA	NA	NA	NA	NA	-0.0253334	NA	NA	NA	NA	NA	NA	NA	NA	NA	NA	NA	NA	NA	NA	NA	NA	NA	NA	NA	1	0	1	1
chr1:27364684-27364772	MAP3K6	NA	NA	NA	0.421805	NA	NA	NA	0.190457	-0.528779	0.211453	-0.586286	0.0182309	NA	NA	NA	NA	-0.0879355	-0.246342	NA	-0.169559	-0.308097	NA	NA	NA	-0.33969	0.0598175	0.72547	NA	-0.348856	NA	NA	NA	NA	0	1	1	14
chr14:68882592-68882872	ACTN1	NA	NA	NA	NA	NA	NA	NA	NA	NA	NA	NA	NA	NA	-2.031e-05	NA	NA	NA	NA	NA	NA	NA	NA	NA	NA	NA	NA	NA	NA	NA	NA	NA	NA	NA	1	0	1	1
chr20:48995882-48998192	ARFGEF2	NA	NA	NA	NA	NA	NA	NA	NA	NA	NA	NA	NA	NA	-0.0356651	NA	NA	NA	NA	NA	NA	NA	NA	NA	NA	NA	NA	NA	NA	NA	NA	NA	NA	NA	1	0	1	1
chr12:49560370-49563000	MCRS1	NA	NA	NA	NA	NA	NA	NA	NA	NA	NA	NA	NA	NA	-0.0110916	NA	NA	NA	NA	NA	NA	NA	NA	NA	NA	NA	NA	NA	NA	NA	NA	NA	NA	NA	1	0	1	1
chr16:56830685-56831841	NUP93	NA	NA	NA	NA	NA	NA	NA	NA	NA	NA	NA	NA	NA	-0.0167	NA	NA	NA	NA	NA	NA	NA	NA	NA	NA	NA	-0.651043	NA	NA	NA	-0.380878	NA	NA	NA	1	0	1	3
chr12:54517642-54517805	NCKAP1L	NA	NA	NA	NA	NA	NA	NA	0.998231	NA	NA	NA	NA	NA	-0.011007	NA	NA	NA	NA	NA	NA	NA	NA	NA	NA	NA	NA	NA	NA	NA	NA	NA	NA	NA	1	0	1	2
chr19:38942751-38944968	AC011455.2	NA	NA	NA	NA	0.337168	NA	NA	-0.622708	-0.231602	NA	-0.739541	0.0089164	-0.325225	NA	NA	-0.748714	NA	-0.335076	NA	0.0906546	NA	-0.998852	NA	NA	-0.25122	0.424788	NA	NA	NA	NA	NA	0.130733	-0.307645	0	1	1	14
chr3:19978403-19983707	RAB5A	NA	NA	NA	NA	NA	NA	NA	NA	NA	NA	NA	NA	NA	-0.0057391	NA	NA	NA	NA	NA	NA	NA	NA	NA	NA	NA	NA	NA	NA	NA	NA	NA	NA	NA	1	0	1	1
chr9:129069129-129069848	MIGA2	-0.106477	-0.296631	NA	0.668137	-0.620505	0.319732	-0.285688	0.583691	-0.663243	NA	-0.129384	0.346882	-0.0690374	-0.0493671	-0.656142	NA	0.82292	-0.00388997	0.413506	-0.0320637	0.159101	0.576933	0.605621	0.0639985	-0.683111	-0.113201	0.315041	-0.983942	-0.394637	-0.0818085	NA	-0.700902	NA	3	0	3	28
chr1:2560714-2561776	TNFRSF14	-0.0892156	-0.10648	-0.338094	0.336561	-0.613303	0.433049	0.0340684	-0.291921	0.564197	NA	NA	0.00437267	-0.778066	-0.268145	NA	0.190344	-0.159926	0.355561	0.107239	0.372217	-0.30872	0.299572	NA	0.258731	0.201538	0.200743	-0.525649	NA	NA	NA	NA	NA	NA	0	2	2	23
chr11:13713033-13714508	FAR1	NA	NA	NA	NA	NA	NA	NA	0.365529	NA	NA	NA	NA	NA	-0.0100877	NA	NA	NA	NA	NA	NA	NA	NA	NA	NA	NA	NA	NA	NA	NA	NA	NA	NA	NA	1	0	1	2
chr10:22327650-22327741	BMI1	0.394736	-0.175976	NA	NA	NA	NA	NA	0.378422	NA	NA	NA	0.0378401	0.240989	0.878494	NA	NA	-0.465704	NA	NA	NA	0.462407	NA	NA	NA	NA	NA	-0.0368792	NA	NA	-0.70385	NA	-0.876137	NA	1	1	2	11
chr1:35184593-35187000	SFPQ	NA	NA	-0.00473114	NA	NA	NA	NA	-0.244946	NA	NA	NA	-0.155647	NA	-0.00078209	-0.759941	NA	NA	NA	NA	NA	NA	NA	NA	NA	NA	NA	-0.784689	NA	NA	NA	NA	NA	NA	2	0	2	6
chr6:110892443-110892734	AMD1	NA	NA	NA	NA	NA	NA	NA	NA	NA	NA	NA	NA	NA	-0.0117168	NA	NA	NA	NA	NA	NA	NA	NA	NA	NA	NA	NA	NA	NA	NA	NA	NA	NA	NA	1	0	1	1
chr4:82426633-82427189	HNRNPDL	NA	NA	NA	NA	NA	NA	NA	NA	NA	NA	NA	NA	NA	-0.0187455	NA	NA	NA	NA	NA	NA	NA	NA	NA	NA	NA	NA	NA	NA	NA	NA	NA	NA	NA	1	0	1	1
chr14:105384987-105389960	PACS2	-0.241824	-0.0110687	-0.0310681	0.863934	-0.708875	0.23461	NA	0.0782236	-0.438403	NA	-0.596162	0.0505358	-0.135979	-0.85101	-0.620596	NA	0.630464	-0.156657	-0.432138	0.0242981	-0.0583567	0.291975	0.0312689	-0.321335	-0.70315	-0.41013	0.468422	0.956942	-0.490885	-0.148726	-0.671069	-0.674228	-0.515672	2	2	4	30
chr3:50273646-50273758	SEMA3B	0.228633	NA	NA	NA	-0.831484	-0.4075	NA	-0.410199	-0.480906	NA	0.999172	NA	-0.100071	NA	-0.0610416	NA	-0.265177	NA	-0.700487	-0.16136	0.531365	NA	NA	0.0385816	NA	0.16785	-0.234092	NA	-0.621022	NA	-0.291884	0.0884719	NA	0	1	1	18
chr17:48623135-48625752	HOXB9	NA	NA	NA	NA	NA	-0.702157	NA	NA	NA	NA	NA	NA	NA	NA	NA	NA	NA	NA	NA	NA	NA	NA	NA	-0.0266457	NA	NA	NA	NA	NA	NA	NA	NA	NA	1	0	1	2
chr15:64500166-64622826	ZNF609	NA	NA	NA	NA	NA	NA	NA	NA	NA	NA	NA	NA	NA	-0.0225824	NA	NA	NA	NA	NA	NA	NA	NA	NA	NA	NA	NA	NA	NA	NA	NA	NA	NA	NA	1	0	1	1
chr19:55098858-55098950	PPP1R12C	NA	NA	NA	NA	NA	NA	NA	NA	NA	NA	NA	NA	NA	-0.0107957	NA	NA	NA	NA	NA	NA	NA	NA	NA	NA	NA	NA	NA	NA	NA	NA	NA	NA	NA	1	0	1	1
chr11:65650192-65650400	SIPA1	NA	NA	NA	NA	NA	NA	NA	NA	NA	NA	NA	NA	NA	-0.0141314	-0.00016676	0.27393	NA	NA	NA	NA	NA	NA	0.357618	-0.334453	NA	NA	NA	NA	NA	NA	NA	NA	NA	2	0	2	5
chr6:167022635-167024781	CEP43	NA	NA	NA	NA	NA	NA	NA	NA	NA	NA	NA	NA	NA	-0.0122515	NA	NA	NA	NA	NA	NA	NA	NA	NA	NA	NA	NA	NA	NA	NA	NA	NA	NA	NA	1	0	1	1
chr16:24555703-24555820	RBBP6	NA	NA	NA	NA	NA	NA	NA	NA	NA	NA	NA	NA	NA	-0.031896	NA	NA	NA	NA	NA	NA	NA	NA	NA	NA	NA	NA	0.0977887	NA	NA	NA	NA	NA	NA	1	0	1	2
chr17:1100735-1125182	ABR	NA	NA	NA	NA	NA	NA	NA	NA	NA	NA	NA	NA	NA	-0.0457875	NA	NA	NA	NA	NA	NA	NA	NA	NA	NA	NA	NA	NA	NA	NA	NA	NA	NA	NA	1	0	1	1
chr2:117935579-117936701	CCDC93	-0.0605241	NA	0.524709	-0.305003	0.802464	NA	0.999267	0.315263	-0.671314	NA	NA	0.0159104	NA	-0.123577	0.282362	NA	0.849432	-0.402935	NA	0.977716	-0.206287	NA	NA	NA	NA	NA	-0.363901	-0.323972	-0.358958	NA	NA	NA	NA	0	1	1	17
chr15:42165816-42166158	VPS39	NA	NA	NA	NA	NA	NA	NA	0.539123	NA	NA	NA	0.00299985	NA	-0.66648	NA	NA	NA	NA	NA	NA	NA	NA	NA	NA	NA	NA	NA	NA	NA	NA	NA	NA	NA	0	1	1	3
chr19:39417692-39417904	PLEKHG2	NA	NA	NA	NA	NA	NA	NA	0.284831	NA	NA	NA	0.00113996	NA	0.817234	NA	NA	NA	NA	NA	-0.26743	NA	NA	NA	NA	NA	NA	-0.371054	NA	NA	NA	NA	0.0768832	NA	0	1	1	6
chr12:132780914-132782295	GOLGA3	NA	NA	NA	NA	NA	NA	NA	NA	NA	NA	NA	NA	NA	-0.0133142	NA	NA	NA	NA	NA	NA	NA	NA	NA	NA	NA	NA	NA	NA	NA	NA	NA	NA	NA	1	0	1	1
chr10:98431291-98433939	HPS1	NA	NA	NA	NA	NA	NA	NA	NA	NA	NA	NA	NA	NA	-0.00723251	NA	NA	NA	NA	NA	NA	NA	NA	NA	NA	NA	NA	NA	NA	NA	NA	NA	NA	NA	1	0	1	1
chr6:33198464-33199168	RXRB	0.109202	-0.0105664	-0.0500557	0.620431	0.268419	0.32284	0.308369	0.458744	0.684966	0.670613	-0.409997	0.00052668	-0.347698	-0.329538	0.168233	-0.168361	-0.488744	-0.269493	0.412678	-0.980099	-0.465896	0.499177	0.0615862	-0.199812	0.252639	-0.387966	0.464319	-0.102436	0.110326	-0.297863	NA	-0.401988	-0.551844	1	1	2	32
chr16:57059061-57059466	NLRC5	NA	-0.661722	NA	0.0273703	0.118909	0.0295042	0.481374	0.48989	NA	-0.296742	NA	0.00584213	NA	-0.00110297	NA	NA	0.594634	-0.354427	-0.425299	NA	0.409685	NA	NA	-0.753563	NA	NA	-0.676906	NA	NA	NA	NA	NA	NA	1	3	4	15
chr17:1883944-1888674	RPA1	NA	NA	NA	NA	NA	NA	NA	NA	NA	NA	NA	NA	NA	-0.0428345	NA	NA	NA	NA	NA	NA	NA	NA	NA	NA	NA	NA	NA	NA	NA	NA	NA	NA	NA	1	0	1	1
chr5:16478987-16481008	RETREG1	NA	NA	NA	NA	NA	NA	NA	NA	NA	NA	NA	0.00587106	-0.236002	NA	NA	NA	NA	NA	NA	NA	NA	NA	NA	NA	NA	NA	NA	NA	NA	NA	NA	NA	NA	0	1	1	2
chrX:40710129-40711168	MED14	NA	NA	NA	NA	NA	NA	NA	0.231793	NA	NA	NA	NA	NA	-0.00321373	NA	NA	NA	NA	NA	NA	NA	NA	NA	NA	NA	NA	0.113469	NA	NA	NA	NA	NA	NA	1	0	1	3
chr20:45949080-45949169	ZNF335	NA	NA	NA	NA	NA	NA	NA	NA	NA	NA	NA	NA	NA	-0.0376829	NA	NA	NA	NA	NA	NA	NA	NA	NA	NA	NA	NA	NA	NA	NA	NA	NA	NA	NA	1	0	1	1
chr1:43443477-43443596	SZT2	NA	NA	NA	NA	NA	NA	NA	0.13411	NA	NA	NA	NA	NA	-0.0588259	NA	NA	NA	NA	NA	-0.764438	NA	NA	NA	NA	NA	NA	0.0338176	NA	NA	NA	NA	NA	NA	0	1	1	4
chr10:69155887-69157006	VPS26A	NA	NA	NA	NA	NA	NA	NA	NA	NA	NA	NA	NA	NA	-0.0340567	NA	NA	NA	NA	NA	NA	NA	NA	NA	NA	NA	NA	NA	NA	NA	NA	NA	NA	NA	1	0	1	1
chr1:1649637-1652438	CDK11B	NA	NA	NA	NA	NA	NA	NA	NA	NA	NA	NA	NA	NA	-0.0374275	NA	NA	NA	NA	NA	NA	NA	NA	NA	NA	NA	NA	NA	NA	NA	NA	NA	NA	NA	1	0	1	1
chr12:53186077-53186390	ZNF740	NA	NA	NA	NA	NA	NA	NA	0.398949	NA	NA	NA	NA	NA	-0.419091	NA	NA	NA	NA	NA	-0.0436281	NA	NA	NA	NA	NA	NA	NA	NA	NA	NA	NA	NA	NA	1	0	1	3
chr3:194648804-194650880	LSG1	0.0819665	-0.32286	-0.360989	0.171907	-0.793122	0.0679734	0.999093	0.262958	-0.216477	0.115359	-0.855279	0.022917	-0.131066	-0.397361	-0.506305	NA	-0.062612	-0.851257	0.419568	0.706457	-0.0553301	NA	NA	-0.193437	NA	-0.0909866	0.202049	0.231359	NA	NA	NA	NA	NA	0	1	1	24
chr9:128999805-129001528	NUP188	NA	NA	NA	NA	NA	NA	NA	NA	NA	NA	NA	NA	NA	-0.0327602	NA	NA	NA	NA	NA	NA	NA	NA	NA	NA	NA	NA	NA	NA	NA	NA	NA	NA	NA	1	0	1	1
chr16:16090588-16102626	ABCC1	NA	NA	NA	NA	NA	NA	NA	NA	NA	NA	NA	NA	NA	-0.00676888	NA	NA	NA	NA	NA	NA	NA	NA	NA	NA	NA	NA	NA	NA	NA	NA	NA	NA	NA	1	0	1	1
chr2:219221302-219222049	ATG9A	NA	NA	NA	NA	NA	NA	NA	NA	NA	NA	NA	NA	NA	-0.0424946	NA	NA	NA	NA	NA	NA	NA	NA	NA	NA	NA	NA	NA	NA	NA	NA	NA	NA	NA	1	0	1	1
chr11:60392786-60393786	MS4A7	NA	NA	-0.390548	NA	NA	NA	NA	-0.112455	0.304566	NA	-0.70063	0.139871	-0.301783	-0.244353	-0.0628374	NA	0.730185	-0.610865	0.736095	0.535107	-0.580007	NA	NA	NA	0.0146362	NA	0.392033	NA	NA	NA	NA	NA	NA	0	1	1	15
chr16:8813106-8847723	PMM2	NA	NA	NA	NA	NA	NA	NA	NA	NA	NA	NA	NA	NA	-0.0128966	NA	NA	NA	NA	NA	NA	NA	NA	NA	NA	NA	NA	NA	NA	NA	NA	NA	NA	NA	1	0	1	1
chr2:159762993-159767283	MARCHF7	NA	-0.125595	0.312594	0.455418	NA	NA	NA	0.217632	NA	NA	NA	NA	NA	NA	NA	NA	NA	0.492286	0.247494	-0.0481082	-0.467641	NA	NA	NA	0.359575	NA	0.16628	NA	0.155617	NA	NA	0.661323	NA	1	0	1	12
chr12:49042878-49043075	KMT2D	NA	NA	NA	NA	NA	NA	NA	NA	NA	NA	NA	NA	NA	-0.0256112	NA	NA	NA	NA	NA	NA	NA	NA	NA	NA	NA	NA	NA	NA	NA	NA	NA	NA	NA	1	0	1	1
chr2:138560927-138564707	SPOPL	NA	NA	NA	NA	NA	NA	NA	NA	NA	NA	NA	NA	NA	-0.0427498	NA	NA	NA	NA	NA	NA	NA	NA	NA	NA	NA	NA	NA	NA	NA	NA	NA	NA	NA	1	0	1	1
chr20:35729527-35731940	RBM39	NA	NA	NA	NA	NA	NA	NA	NA	NA	NA	NA	NA	NA	-0.00430268	NA	NA	NA	NA	NA	NA	NA	NA	NA	NA	NA	NA	NA	NA	NA	NA	NA	NA	NA	1	0	1	1
chr4:110197974-110198246	ELOVL6	NA	-0.0603541	NA	-0.537961	NA	NA	NA	0.508409	-0.262316	NA	-0.100957	NA	0.184731	NA	-0.253106	-0.592509	NA	NA	NA	-0.159156	NA	0.620599	-0.07972	NA	NA	-0.0116458	-0.858519	NA	NA	-0.472369	NA	0.357762	-0.173466	1	0	1	16
chr10:87756922-87767672	ATAD1	NA	NA	NA	NA	NA	NA	NA	NA	NA	NA	NA	NA	NA	-0.0337582	NA	NA	NA	NA	NA	NA	NA	NA	NA	NA	NA	NA	NA	NA	NA	NA	NA	NA	NA	1	0	1	1
chr17:63585328-63588999	DCAF7	NA	NA	NA	NA	NA	NA	NA	NA	NA	NA	NA	NA	NA	-0.00081447	NA	NA	NA	NA	NA	NA	NA	NA	NA	NA	NA	NA	NA	NA	NA	NA	NA	NA	NA	1	0	1	1
chr17:30285480-30286813	BLMH	NA	NA	NA	NA	NA	NA	NA	NA	NA	NA	NA	NA	NA	-0.0423921	0.090039	NA	NA	NA	NA	NA	NA	NA	NA	NA	NA	NA	NA	NA	NA	NA	NA	NA	NA	1	0	1	2
chr4:159330498-159331430	RAPGEF2	NA	NA	NA	NA	NA	NA	NA	NA	NA	NA	NA	NA	NA	-0.012706	NA	NA	NA	NA	NA	NA	NA	NA	NA	NA	NA	NA	NA	NA	NA	NA	NA	NA	NA	1	0	1	1
chr2:20290790-20294375	PUM2	NA	NA	NA	NA	NA	NA	NA	NA	NA	NA	NA	NA	NA	-0.0264021	NA	NA	NA	NA	NA	-0.0101339	NA	NA	NA	NA	NA	NA	0.476934	NA	NA	NA	NA	NA	NA	2	0	2	3
chr10:49832908-49841949	PARG	NA	NA	NA	NA	NA	NA	NA	NA	NA	NA	NA	NA	NA	-0.00850174	NA	NA	NA	NA	NA	NA	NA	NA	NA	NA	NA	NA	NA	NA	NA	NA	NA	NA	NA	1	0	1	1
chr17:82932735-82937270	TBCD	NA	NA	NA	NA	NA	NA	NA	NA	NA	NA	NA	NA	NA	-0.00227366	NA	NA	NA	NA	NA	NA	NA	NA	NA	NA	NA	NA	NA	NA	NA	NA	NA	NA	NA	1	0	1	1
chr16:4454927-4455545	DNAJA3	NA	NA	NA	NA	NA	NA	NA	NA	NA	NA	NA	NA	NA	-0.0085924	NA	NA	NA	NA	NA	NA	NA	NA	NA	NA	NA	NA	NA	NA	NA	NA	NA	NA	NA	1	0	1	1
chr19:308665-308800	MIER2	NA	NA	NA	NA	NA	NA	NA	NA	NA	NA	NA	NA	NA	-0.0195324	NA	NA	NA	NA	NA	NA	NA	NA	NA	NA	NA	NA	NA	NA	NA	NA	NA	NA	NA	1	0	1	1
chr21:44865447-44873501	PTTG1IP	NA	NA	NA	NA	NA	NA	NA	NA	NA	NA	NA	NA	NA	-0.0086439	NA	NA	NA	NA	NA	NA	NA	NA	NA	NA	NA	NA	NA	NA	NA	NA	NA	NA	NA	1	0	1	1
chr11:14477015-14479568	COPB1	NA	NA	NA	NA	NA	NA	NA	NA	NA	NA	NA	NA	NA	-0.0139892	NA	NA	NA	NA	NA	NA	NA	NA	NA	NA	NA	NA	NA	NA	NA	NA	NA	NA	NA	1	0	1	1
chr10:96656934-96709566	PIK3AP1	NA	NA	NA	NA	NA	NA	NA	NA	NA	NA	NA	NA	NA	-0.0485855	NA	NA	NA	NA	NA	NA	NA	NA	NA	NA	NA	NA	NA	NA	NA	NA	NA	NA	NA	1	0	1	1
chr20:49114893-49115781	STAU1	NA	NA	NA	NA	NA	NA	NA	NA	NA	NA	NA	NA	NA	-0.0378587	NA	NA	NA	NA	NA	NA	NA	NA	NA	NA	NA	NA	NA	NA	NA	NA	NA	NA	NA	1	0	1	1
chr19:19492712-19494293	GATAD2A	NA	NA	NA	NA	NA	NA	NA	NA	NA	NA	NA	NA	NA	-0.00185867	NA	NA	NA	NA	NA	NA	NA	NA	NA	NA	NA	NA	NA	NA	NA	NA	NA	NA	NA	1	0	1	1
chr21:37096643-37108391	TTC3	NA	NA	NA	NA	NA	NA	NA	0.160132	NA	NA	NA	NA	NA	-0.0396225	NA	NA	NA	NA	NA	NA	NA	NA	NA	NA	NA	NA	NA	NA	NA	NA	NA	NA	NA	1	0	1	2
chr6:26406256-26407670	BTN3A1	NA	NA	0.604506	0.469315	-0.963628	0.361313	0.26476	0.268034	-0.306062	NA	NA	1.576e-05	-0.224516	-0.01336	NA	NA	0.218615	0.874716	0.407249	0.916136	-0.147119	NA	NA	NA	NA	-0.393421	0.530661	NA	NA	NA	NA	NA	NA	1	1	2	17
chr16:59826-60215	RHBDF1	NA	-0.00057579	-0.0560867	-0.509387	0.170517	0.044297	NA	-0.578483	-0.222204	0.397183	0.687843	0.316117	-0.45531	NA	NA	NA	-0.522471	0.480593	0.765332	-0.178109	-0.332848	NA	0.00091091	-0.734251	0.150146	0.176111	0.108987	-0.151225	0.22615	NA	0.045687	0.0644124	NA	1	3	4	25
chr1:161753261-161756785	DUSP12	NA	-0.151412	0.209792	0.600103	-0.687611	NA	-0.626199	0.498929	-0.0480999	NA	NA	0.4702	-0.408746	0.954683	0.396636	NA	-0.56234	-0.359645	0.716153	0.258686	-0.371756	NA	0.138897	0.392588	NA	-0.455238	0.318747	-0.8243	NA	NA	NA	0.132774	0.536205	1	0	1	23
chr19:19498722-19501117	GATAD2A	NA	NA	NA	NA	NA	NA	NA	NA	NA	NA	NA	NA	NA	-0.00198772	NA	NA	NA	NA	NA	NA	NA	NA	NA	NA	NA	NA	NA	NA	NA	NA	NA	NA	NA	1	0	1	1
chr5:53090062-53090518	ITGA2	NA	NA	NA	NA	NA	NA	NA	0.407258	NA	NA	NA	0.0111367	NA	NA	NA	NA	NA	NA	NA	NA	NA	NA	NA	NA	NA	NA	NA	NA	0.122216	NA	NA	NA	NA	0	1	1	3
chr16:3777657-3778010	CREBBP	NA	NA	NA	NA	NA	NA	NA	NA	NA	NA	NA	NA	NA	-0.00777265	NA	NA	NA	NA	NA	NA	NA	NA	NA	NA	NA	NA	NA	NA	NA	NA	NA	NA	NA	1	0	1	1
chr12:830160-857160	WNK1	NA	NA	NA	NA	NA	NA	NA	NA	NA	NA	NA	NA	NA	-0.00323514	NA	NA	NA	NA	NA	NA	NA	NA	NA	NA	NA	NA	NA	NA	NA	NA	NA	NA	NA	1	0	1	1
chr20:34504403-34507694	ITCH	NA	NA	NA	NA	NA	NA	NA	NA	NA	NA	NA	NA	NA	-0.0464473	NA	NA	NA	NA	NA	NA	NA	NA	NA	NA	NA	NA	NA	NA	NA	NA	NA	NA	NA	1	0	1	1
chr18:51077419-51078255	SMAD4	NA	NA	NA	NA	NA	NA	NA	NA	NA	NA	NA	0.0481918	NA	NA	NA	NA	NA	NA	NA	NA	NA	NA	NA	NA	NA	NA	NA	NA	-0.223898	NA	NA	NA	NA	0	1	1	2
chr1:23786423-23787274	PITHD1	NA	NA	NA	NA	NA	NA	NA	NA	NA	NA	NA	NA	NA	-0.00532954	NA	NA	NA	NA	NA	NA	NA	NA	NA	NA	NA	NA	NA	NA	NA	NA	NA	NA	NA	1	0	1	1
chr1:161052797-161053257	ARHGAP30	NA	NA	NA	NA	NA	NA	NA	0.198718	NA	NA	NA	NA	NA	-0.00021718	NA	NA	NA	NA	NA	NA	NA	NA	NA	NA	NA	NA	NA	NA	NA	NA	NA	NA	NA	1	0	1	2
chr19:36005437-36006422	SYNE4	NA	0.683462	-0.416924	NA	0.823255	NA	NA	NA	NA	NA	NA	NA	-0.137012	NA	NA	NA	-0.314866	NA	NA	-0.619575	NA	NA	0.0338273	NA	NA	NA	NA	NA	0.622853	-0.629861	-0.132129	NA	NA	0	1	1	10
chr9:5081861-5089673	JAK2	NA	NA	NA	NA	NA	NA	NA	NA	NA	NA	NA	NA	NA	-0.0263075	NA	NA	NA	NA	NA	NA	NA	NA	NA	NA	NA	NA	NA	NA	NA	NA	NA	NA	NA	1	0	1	1
chr19:1816345-1816430	REXO1	NA	NA	NA	NA	NA	-0.601967	NA	0.404128	0.67154	NA	NA	0.390753	NA	-0.467082	NA	NA	-0.0239057	NA	NA	NA	NA	NA	NA	0.578936	0.223636	NA	-0.0995859	NA	NA	NA	NA	NA	NA	1	0	1	9
chr16:81908591-81910519	PLCG2	NA	NA	NA	NA	NA	NA	NA	NA	NA	NA	NA	NA	NA	-0.0439874	NA	NA	NA	NA	NA	NA	NA	NA	NA	NA	NA	NA	NA	NA	NA	NA	NA	NA	NA	1	0	1	1
chr12:56243392-56243784	ANKRD52	NA	NA	NA	NA	NA	NA	NA	NA	NA	NA	NA	NA	NA	-3.058e-05	NA	NA	NA	NA	NA	-0.202056	NA	NA	NA	NA	NA	NA	NA	NA	NA	NA	NA	NA	NA	1	0	1	2
chr19:1915026-1917693	SCAMP4	NA	0.370139	-0.392273	-0.292077	-0.900293	NA	0.0743227	0.795784	NA	NA	NA	0.701378	-0.540655	-0.523978	NA	NA	-0.176072	-0.352982	NA	-0.664332	0.312889	NA	0.0616327	NA	NA	0.0368816	0.10819	-0.798285	-0.530029	NA	NA	NA	NA	0	1	1	18
chr9:120847353-120851237	CUTALP	NA	NA	NA	NA	NA	NA	NA	0.530446	NA	NA	NA	NA	NA	-0.0191104	NA	NA	NA	NA	NA	NA	NA	NA	NA	NA	NA	NA	NA	NA	NA	NA	NA	NA	NA	1	0	1	2
chr21:33559775-33559876	SON	0.109023	-0.131315	NA	-0.0806604	0.527436	NA	-0.177757	NA	NA	NA	NA	4.32e-06	0.711158	-0.00584576	NA	0.0642191	-0.159193	0.459414	-0.352188	-0.164385	-0.427944	-0.510903	0.0142463	NA	0.292255	NA	-0.667753	NA	NA	-0.674916	-0.500126	0.919832	NA	1	2	3	21
chr14:24182163-24182277	IPO4	NA	NA	NA	NA	NA	NA	NA	NA	NA	NA	NA	NA	NA	-0.0498006	NA	NA	NA	NA	NA	NA	NA	NA	NA	NA	NA	NA	NA	NA	NA	NA	NA	NA	NA	1	0	1	1
chr19:4033173-4033419	PIAS4	NA	NA	NA	NA	NA	NA	NA	NA	NA	NA	NA	NA	NA	-0.0200498	NA	NA	NA	NA	NA	NA	NA	NA	NA	NA	NA	NA	NA	NA	NA	NA	NA	NA	NA	1	0	1	1
chr16:3757376-3757808	CREBBP	NA	NA	NA	NA	NA	NA	NA	NA	NA	NA	NA	NA	NA	-0.0407346	NA	NA	NA	NA	NA	NA	NA	NA	NA	NA	NA	NA	NA	NA	NA	NA	NA	NA	NA	1	0	1	1
chr3:133644363-133649382	TOPBP1	NA	NA	NA	NA	NA	NA	NA	NA	NA	NA	NA	NA	NA	-0.0143583	NA	NA	NA	NA	NA	NA	NA	NA	NA	NA	NA	NA	NA	NA	NA	NA	NA	NA	NA	1	0	1	1
chr13:112823409-112824343	ATP11A	NA	NA	NA	NA	NA	NA	NA	NA	NA	NA	NA	0.00959813	NA	-0.305829	NA	NA	NA	NA	NA	NA	NA	NA	NA	NA	NA	NA	NA	NA	NA	NA	NA	NA	NA	0	1	1	2
chr6:45512407-45546826	RUNX2	NA	NA	NA	NA	NA	NA	NA	NA	NA	NA	NA	NA	NA	-0.00078995	NA	NA	NA	NA	NA	NA	NA	NA	NA	NA	NA	NA	NA	NA	NA	NA	NA	NA	NA	1	0	1	1
chr1:168236624-168236711	SFT2D2	NA	NA	NA	NA	NA	NA	NA	NA	NA	NA	NA	NA	NA	-0.00795972	NA	NA	NA	NA	NA	NA	NA	NA	NA	NA	NA	NA	NA	NA	NA	NA	NA	NA	NA	1	0	1	1
chr12:57515058-57515149	MARS1	NA	NA	NA	NA	NA	NA	NA	NA	NA	NA	NA	NA	NA	-0.0198069	NA	NA	NA	NA	NA	NA	NA	NA	NA	NA	NA	NA	NA	NA	NA	NA	NA	NA	NA	1	0	1	1
chr12:48834497-48836120	DDX23	NA	NA	NA	NA	NA	NA	NA	NA	NA	NA	NA	NA	NA	-0.029324	NA	NA	NA	NA	NA	NA	NA	NA	NA	NA	NA	NA	NA	NA	NA	NA	NA	NA	NA	1	0	1	1
chr17:1730487-1730754	WDR81	NA	NA	0.195601	NA	NA	NA	NA	NA	NA	NA	NA	0.066578	NA	-0.0364603	NA	NA	0.433365	NA	NA	-0.373487	-0.566883	NA	-0.363599	NA	-0.326317	0.26728	0.055128	NA	NA	NA	NA	NA	0.19331	1	0	1	11
chr6:149597189-149597506	KATNA1	NA	NA	NA	NA	NA	NA	NA	0.313139	NA	NA	NA	NA	NA	-0.0481692	NA	NA	NA	NA	NA	NA	NA	NA	NA	NA	NA	NA	0.315359	NA	NA	NA	NA	NA	NA	1	0	1	3
chr12:31093324-31094589	DDX11	NA	NA	NA	NA	NA	NA	NA	0.452972	NA	NA	NA	NA	NA	-0.668451	NA	NA	NA	NA	NA	-0.168015	NA	NA	NA	NA	NA	NA	0.0286895	NA	NA	NA	NA	NA	NA	0	1	1	4
chr9:742405-744490	KANK1	NA	NA	NA	NA	NA	NA	NA	NA	NA	NA	NA	0.00119055	NA	NA	NA	NA	NA	NA	NA	NA	NA	NA	NA	NA	NA	NA	NA	NA	NA	NA	NA	NA	NA	0	1	1	1
chr3:52405294-52405764	BAP1	0.328216	-0.0180864	-0.150415	-0.300855	-0.368215	NA	-0.146606	NA	NA	NA	NA	0.229026	0.043776	-0.461317	NA	NA	-0.0756641	0.799321	NA	NA	0.0780189	NA	NA	NA	NA	NA	NA	0.621686	0.353783	0.62396	NA	NA	NA	1	1	2	15
chr20:63733739-63734644	ZGPAT	-0.11918	-0.00062651	-0.156904	0.465803	0.482237	0.139733	0.709324	0.554097	-0.930651	-0.144969	0.517652	0.0553603	-0.114264	NA	0.038175	-0.108613	-0.252855	-0.580358	0.125214	-0.854703	-0.0736289	0.277234	0.00264018	-0.608108	0.35966	0.0305159	0.246476	0.763199	0.0589686	-0.489178	NA	0.347524	0.93573	1	3	4	31
chr17:7318356-7318494	NEURL4	NA	NA	NA	0.151026	0.836615	NA	0.456296	-0.474174	-0.295797	NA	NA	0.009482	-0.300169	-0.638113	0.184722	NA	-0.35973	NA	NA	-0.203466	0.504603	-0.999074	0.133821	NA	-0.146519	-0.814981	0.129689	-0.446639	-0.112505	-0.111759	NA	NA	-0.518495	0	1	1	21
chr22:21788388-21788693	MAPK1	NA	NA	NA	NA	NA	NA	NA	NA	NA	NA	NA	NA	NA	-0.00486067	NA	NA	NA	NA	NA	NA	NA	NA	NA	NA	NA	NA	NA	NA	NA	NA	NA	NA	NA	1	0	1	1
chr8:143927081-143927251	PLEC	0.164279	-0.0271178	0.246725	0.418446	0.602657	0.193485	NA	0.324758	0.182151	0.700059	NA	0.227844	-0.549034	-0.0516618	0.258743	NA	-0.0772102	0.21294	-0.791747	-0.0788776	-0.69583	0.998852	0.0912461	-0.356125	-0.193725	0.603687	-0.633288	0.971058	NA	0.412605	NA	-0.0313911	NA	2	0	2	27
chr2:230539382-230540875	SP100	NA	NA	NA	NA	NA	NA	NA	NA	NA	NA	NA	NA	NA	-0.0221466	NA	NA	NA	NA	NA	NA	NA	NA	NA	NA	NA	NA	NA	NA	NA	NA	NA	NA	NA	1	0	1	1
chrX:41341616-41342494	DDX3X	-0.200976	-0.0363375	NA	NA	NA	NA	NA	0.279243	NA	NA	NA	NA	0.489013	-0.018469	NA	NA	0.479415	NA	NA	NA	0.694332	-0.4251	NA	NA	NA	-0.249154	NA	NA	-0.681363	NA	NA	NA	0.78124	2	0	2	11
chr8:38145315-38145962	STAR	NA	NA	NA	NA	NA	NA	NA	NA	NA	NA	NA	NA	NA	-0.0264329	NA	NA	NA	NA	NA	NA	NA	NA	NA	NA	NA	NA	NA	NA	NA	NA	NA	NA	NA	1	0	1	1
chr14:105376925-105379738	PACS2	NA	NA	NA	NA	NA	NA	NA	NA	NA	NA	NA	NA	NA	-0.00735203	NA	NA	NA	NA	NA	NA	NA	NA	NA	NA	NA	NA	NA	NA	NA	NA	NA	NA	NA	1	0	1	1
chr9:35751412-35751626	RGP1	NA	NA	NA	NA	NA	NA	NA	0.197741	NA	NA	NA	NA	NA	-0.0121863	NA	NA	NA	NA	NA	-0.0651658	NA	NA	NA	NA	NA	NA	0.474502	NA	NA	NA	NA	NA	NA	1	0	1	4
chr5:150715662-150718275	DCTN4	NA	NA	NA	NA	NA	NA	NA	NA	NA	NA	NA	NA	NA	-0.0458121	NA	NA	NA	NA	NA	NA	NA	NA	NA	NA	NA	NA	NA	NA	NA	NA	NA	NA	NA	1	0	1	1
chr18:76371571-76378854	ZNF516	NA	NA	NA	NA	NA	NA	NA	0.0437224	NA	NA	NA	NA	NA	-0.0289005	NA	NA	NA	NA	NA	NA	NA	NA	NA	NA	NA	NA	NA	NA	NA	NA	NA	NA	NA	1	1	2	2
chr11:35204640-35206114	CD44	NA	-0.41531	-0.176958	-0.450409	NA	-0.581321	NA	0.747336	NA	NA	NA	NA	NA	NA	NA	NA	-0.0282323	-0.824119	NA	NA	-0.139075	NA	0.648395	NA	NA	NA	-0.0701239	NA	0.59936	NA	NA	NA	NA	1	0	1	11
chr10:104018908-104019733	SLK	NA	NA	NA	NA	NA	NA	NA	NA	NA	NA	NA	0.00155989	NA	-0.0051664	NA	NA	-0.241293	NA	NA	NA	NA	NA	NA	NA	NA	NA	NA	NA	NA	NA	NA	NA	NA	1	1	2	3
chr12:76487618-76559396	OSBPL8	NA	NA	NA	NA	NA	NA	NA	NA	NA	NA	NA	NA	NA	-0.0333245	NA	NA	NA	NA	NA	NA	NA	NA	NA	NA	NA	NA	NA	NA	NA	NA	NA	NA	NA	1	0	1	1
chr12:56602192-56602712	BAZ2A	NA	NA	NA	NA	NA	NA	NA	NA	NA	NA	NA	NA	NA	-0.00211039	NA	NA	NA	NA	NA	NA	NA	NA	NA	NA	NA	NA	NA	NA	NA	NA	NA	NA	NA	1	0	1	1
chr7:140037856-140041643	PARP12	NA	NA	NA	NA	NA	NA	NA	NA	NA	NA	NA	NA	NA	-0.0291205	NA	NA	NA	NA	NA	NA	NA	NA	NA	NA	NA	NA	NA	NA	NA	NA	NA	NA	NA	1	0	1	1
chr3:129566017-129566526	PLXND1	NA	NA	NA	NA	NA	NA	NA	NA	NA	NA	NA	NA	NA	-0.031395	NA	NA	NA	NA	NA	NA	NA	NA	NA	NA	NA	NA	NA	NA	NA	NA	NA	NA	NA	1	0	1	1
chr1:15567269-15567777	DNAJC16	NA	NA	NA	NA	NA	0.377334	NA	0.0636426	NA	NA	NA	0.0426953	NA	-0.603483	NA	-0.728641	NA	NA	NA	NA	NA	NA	NA	0.325659	NA	NA	-0.280246	NA	NA	NA	NA	NA	NA	0	1	1	7
chr22:42161358-42169846	TCF20	NA	NA	NA	NA	NA	NA	NA	0.315317	NA	NA	NA	0.176771	NA	-0.00117063	NA	NA	NA	NA	NA	0.138065	NA	NA	NA	NA	NA	NA	0.110267	NA	NA	NA	NA	NA	NA	1	0	1	5
chr20:43559159-43566472	SGK2	NA	NA	NA	NA	0.790368	NA	NA	NA	NA	NA	-0.530351	0.0451388	-0.632631	NA	NA	-0.443512	NA	NA	NA	NA	NA	NA	NA	NA	NA	NA	0.481856	NA	NA	NA	NA	NA	NA	0	1	1	6
chr4:2953645-2954423	NOP14	NA	NA	NA	NA	NA	NA	NA	NA	NA	NA	NA	NA	NA	-0.0125894	-0.0373468	NA	NA	NA	NA	NA	NA	NA	NA	NA	NA	NA	NA	NA	NA	NA	NA	NA	NA	2	0	2	2
chr19:49992952-49994813	VRK3	NA	NA	NA	NA	NA	NA	NA	NA	NA	NA	NA	NA	NA	-0.00268311	NA	NA	NA	NA	NA	NA	NA	NA	NA	NA	NA	NA	NA	NA	NA	NA	NA	NA	NA	1	0	1	1
chr16:89553135-89553793	SPG7	NA	NA	NA	NA	NA	NA	NA	NA	NA	NA	NA	NA	NA	-0.0104289	NA	NA	NA	NA	NA	NA	NA	NA	NA	NA	NA	NA	NA	NA	NA	NA	NA	NA	NA	1	0	1	1
chr2:131040440-131041229	ARHGEF4	NA	NA	NA	0.463938	NA	NA	NA	0.25117	0.415108	-0.440064	NA	NA	NA	NA	0.0285977	NA	NA	-0.720052	0.0038958	0.222507	NA	0.968439	NA	NA	NA	NA	NA	NA	NA	NA	NA	NA	NA	0	2	2	9
chr1:150826617-150829092	ARNT	NA	NA	NA	NA	NA	NA	NA	NA	NA	NA	NA	NA	NA	-0.0048487	NA	NA	NA	NA	NA	NA	NA	NA	NA	NA	NA	NA	NA	NA	NA	NA	NA	NA	NA	1	0	1	1
chr20:64265429-64267886	PCMTD2	NA	NA	NA	NA	NA	NA	NA	NA	NA	NA	NA	NA	NA	-0.0447337	NA	NA	NA	NA	NA	NA	NA	NA	NA	NA	NA	NA	NA	NA	NA	NA	NA	NA	NA	1	0	1	1
chr12:11752579-11839139	ETV6	NA	NA	NA	NA	NA	NA	NA	NA	NA	NA	NA	NA	NA	-6.008e-05	NA	NA	NA	NA	NA	NA	NA	NA	NA	NA	NA	NA	NA	NA	NA	NA	NA	NA	NA	1	0	1	1
chr16:16136644-16138363	ABCC1	NA	NA	NA	NA	NA	NA	NA	NA	NA	NA	NA	NA	NA	-0.00556779	NA	NA	NA	NA	NA	NA	NA	NA	NA	NA	NA	NA	NA	NA	NA	NA	NA	NA	NA	1	0	1	1
chr17:82946983-82956694	B3GNTL1	NA	NA	NA	NA	NA	NA	NA	-0.397508	NA	NA	NA	NA	NA	-0.00681391	NA	NA	NA	NA	NA	-0.20602	NA	NA	NA	NA	NA	NA	0.251858	NA	NA	NA	NA	NA	NA	1	0	1	4
chr15:89319350-89320765	POLG	NA	NA	NA	NA	NA	NA	NA	0.685498	0.421934	NA	NA	NA	NA	-0.00038554	NA	NA	NA	NA	NA	NA	NA	NA	NA	NA	NA	NA	0.347842	NA	NA	NA	NA	NA	NA	1	0	1	4
chr19:40737769-40739356	ITPKC	NA	-0.0128184	NA	-0.359596	NA	NA	NA	0.316217	0.321927	NA	NA	0.00086606	0.747911	NA	NA	NA	-0.140927	0.557692	NA	-0.124066	-0.0451689	NA	0.0870019	NA	NA	NA	0.0992539	0.895062	-0.251502	NA	NA	-0.0584677	NA	2	1	3	15
chr10:79349753-79351486	PPIF	NA	-0.50188	NA	-0.261759	NA	NA	NA	NA	NA	NA	NA	0.496399	-0.366596	-0.0193906	NA	NA	-0.170641	NA	NA	NA	NA	NA	NA	NA	NA	NA	NA	NA	NA	NA	NA	NA	NA	1	0	1	6
chr1:236566045-236566645	HEATR1	NA	NA	NA	NA	NA	NA	NA	NA	NA	NA	NA	NA	NA	-0.00533047	NA	NA	NA	NA	NA	NA	NA	NA	NA	NA	NA	NA	NA	NA	NA	NA	NA	NA	NA	1	0	1	1
chr6:30580519-30582393	ABCF1	NA	NA	NA	NA	NA	NA	NA	NA	NA	NA	NA	NA	NA	-0.0392651	NA	NA	NA	NA	NA	NA	NA	NA	NA	NA	NA	NA	NA	NA	NA	NA	NA	NA	NA	1	0	1	1
chr11:47477425-47478876	CELF1	NA	NA	-0.00928001	NA	0.436154	NA	NA	0.171138	NA	NA	-0.271361	2e-07	-0.291245	-0.00324971	-0.305881	NA	0.488261	-0.473518	NA	-0.203659	-0.185675	NA	NA	NA	NA	NA	0.827654	0.591835	-0.420146	NA	NA	NA	NA	2	1	3	15
chr2:230467215-230469042	SP100	NA	NA	NA	NA	NA	NA	NA	NA	NA	NA	NA	NA	NA	-0.003408	NA	NA	NA	NA	NA	NA	NA	NA	NA	NA	NA	NA	NA	NA	NA	NA	NA	NA	NA	1	0	1	1
chr6:134173154-134173273	SGK1	NA	NA	NA	NA	NA	NA	NA	-0.387383	NA	NA	NA	0.00053415	NA	-0.207076	NA	NA	-0.518477	-0.660277	0.259054	NA	NA	NA	NA	NA	NA	NA	NA	NA	NA	NA	NA	NA	NA	0	1	1	6
chr16:2975812-2976663	PKMYT1	NA	NA	NA	NA	NA	NA	NA	NA	NA	NA	NA	NA	NA	-0.00159635	NA	NA	NA	NA	NA	NA	NA	NA	NA	NA	NA	NA	NA	NA	NA	NA	NA	NA	NA	1	0	1	1
chr16:57440983-57447341	CIAPIN1	NA	NA	NA	NA	NA	NA	NA	0.722465	NA	NA	NA	NA	NA	-0.0143795	NA	NA	NA	NA	NA	NA	NA	NA	NA	NA	NA	NA	NA	NA	NA	NA	NA	NA	NA	1	0	1	2
chr12:131913836-131914351	ULK1	-0.629708	-0.196018	-0.60443	-0.0810162	0.139563	NA	NA	-0.835618	NA	NA	0.221744	0.0195019	-0.335782	-0.0461808	0.292323	NA	-0.213256	-0.619585	0.16332	-0.234703	0.0481339	0.234096	NA	NA	-0.629508	NA	0.0815752	0.46891	NA	-0.602648	NA	NA	NA	1	2	3	21
chr16:30729572-30733279	SRCAP	NA	NA	NA	NA	NA	NA	NA	NA	NA	NA	NA	NA	NA	-0.00056157	NA	NA	NA	NA	NA	NA	NA	NA	NA	NA	NA	NA	NA	NA	NA	NA	NA	NA	NA	1	0	1	1
chr13:29514583-29516137	SLC7A1	NA	NA	NA	NA	NA	NA	NA	NA	NA	NA	NA	NA	NA	-0.00411002	NA	NA	NA	NA	NA	NA	NA	NA	NA	NA	NA	NA	NA	NA	NA	NA	NA	NA	NA	1	0	1	1
chr19:13105396-13105486	TRMT1	-0.614564	-0.00236713	-0.158035	0.168252	0.403592	0.0261225	0.319487	0.811077	-0.418788	-0.393898	-0.612738	0.0075409	-0.269683	-0.161369	0.200823	-0.844105	-0.109593	-0.496023	-0.0370742	-0.290285	-0.448243	0.782257	0.00025328	-0.322401	0.430352	-0.720678	0.665279	-0.263898	0.232813	-0.376302	-0.0342218	0.315389	0.603824	3	3	6	33
chr7:152151581-152152704	KMT2C	NA	NA	NA	NA	NA	NA	NA	NA	NA	NA	NA	NA	NA	-0.0407238	NA	NA	NA	NA	NA	NA	NA	NA	NA	NA	NA	NA	NA	NA	NA	NA	NA	NA	NA	1	0	1	1
chr1:203700923-203702043	ATP2B4	NA	NA	NA	NA	NA	NA	NA	-0.781285	NA	NA	NA	0.0220042	NA	-0.0207693	NA	NA	NA	NA	NA	NA	NA	NA	NA	NA	NA	NA	0.892337	NA	NA	NA	NA	NA	NA	1	1	2	4
chr17:28735004-28735239	NEK8	NA	NA	NA	NA	NA	NA	NA	-0.0173212	NA	NA	NA	NA	0.230978	-0.047641	NA	NA	NA	NA	NA	0.640158	NA	NA	NA	NA	NA	NA	0.121403	-0.573681	0.361458	NA	NA	NA	NA	2	0	2	7
chr12:131906924-131907494	ULK1	NA	NA	NA	NA	NA	NA	NA	NA	NA	NA	NA	NA	NA	0.0472181	NA	NA	NA	NA	NA	NA	NA	NA	NA	NA	NA	NA	NA	NA	NA	NA	NA	NA	NA	0	1	1	1
chr11:112226526-112228593	PTS	NA	NA	-0.05419	NA	0.502946	NA	-0.872929	0.664467	NA	NA	NA	0.00044222	0.780632	-0.681546	0.0548894	NA	-0.0288649	-0.372872	-0.0493798	-0.536969	-0.41586	NA	NA	NA	NA	NA	0.109248	NA	NA	NA	NA	NA	NA	2	1	3	14
chr12:55940722-55940896	DGKA	NA	NA	NA	NA	NA	NA	NA	0.267789	NA	NA	NA	NA	NA	-0.0384188	NA	NA	NA	NA	NA	NA	NA	NA	NA	NA	NA	NA	0.474312	NA	NA	NA	NA	NA	NA	1	0	1	3
chr17:67357578-67366411	PSMD12	NA	NA	NA	NA	NA	NA	NA	NA	NA	NA	NA	NA	NA	-0.0457248	NA	NA	NA	NA	NA	NA	NA	NA	NA	NA	NA	NA	NA	NA	NA	NA	NA	NA	NA	1	0	1	1
chr19:19502526-19505343	GATAD2A	NA	NA	NA	NA	NA	NA	NA	NA	NA	NA	NA	NA	NA	-0.0182963	NA	NA	NA	NA	NA	NA	NA	NA	NA	NA	NA	NA	NA	NA	NA	NA	NA	NA	NA	1	0	1	1
chr2:189752979-189753915	OSGEPL1	NA	NA	NA	NA	NA	NA	NA	0.00436889	NA	NA	NA	NA	NA	0.658288	NA	NA	NA	NA	NA	NA	NA	NA	NA	NA	NA	NA	NA	NA	NA	NA	NA	NA	NA	0	1	1	2
chr22:50195040-50197240	TRABD	NA	NA	NA	NA	NA	NA	NA	NA	NA	NA	NA	NA	NA	-0.00138763	-0.205282	NA	NA	NA	NA	NA	NA	-0.326038	NA	NA	NA	NA	NA	NA	NA	NA	NA	NA	NA	1	0	1	3
chr11:34439079-34449191	CAT	NA	NA	NA	NA	NA	NA	NA	NA	NA	NA	NA	NA	NA	-0.0414251	NA	NA	NA	NA	NA	NA	NA	NA	NA	NA	NA	NA	NA	NA	NA	NA	NA	NA	NA	1	0	1	1
chr6:85558060-85572136	SNX14	NA	NA	NA	NA	NA	NA	NA	NA	NA	NA	NA	NA	NA	-0.00269731	NA	NA	NA	NA	NA	NA	NA	NA	NA	NA	NA	NA	NA	NA	NA	NA	NA	NA	NA	1	0	1	1
chr16:4798184-4798568	ROGDI	NA	-0.462579	NA	NA	0.509313	-0.0332399	NA	0.26078	NA	NA	NA	NA	NA	-0.0232022	NA	NA	0.339114	NA	NA	NA	NA	NA	NA	NA	NA	NA	-0.179894	NA	NA	NA	NA	NA	NA	2	0	2	7
chr17:42323354-42323572	STAT3	0.672388	-0.162673	NA	NA	0.357291	NA	NA	NA	NA	NA	NA	0.00152648	0.140537	-0.0541345	NA	NA	-0.33648	NA	NA	NA	NA	0.319187	NA	NA	NA	NA	NA	NA	NA	NA	NA	NA	NA	0	1	1	8
chr15:74800922-74801011	CSK	NA	NA	NA	NA	NA	NA	NA	NA	NA	NA	NA	NA	NA	-0.02404	NA	NA	NA	NA	NA	NA	NA	NA	NA	NA	NA	NA	NA	NA	NA	NA	NA	NA	NA	1	0	1	1
chr6:31970024-31970108	DXO	-0.325071	-0.0889574	-0.138433	0.24096	-0.338924	0.117291	0.267	-0.245794	0.50616	-0.479563	NA	0.0318429	0.387681	-0.0669702	0.0781789	-0.13192	-0.0819075	-0.286258	0.547755	0.199893	0.242599	0.483262	0.016102	-0.408872	-0.646438	0.286172	-0.283628	0.503628	-0.336975	-0.503987	-0.758525	-0.234954	0.174374	0	2	2	32
chr2:32128479-32136562	SPAST	NA	NA	NA	NA	NA	NA	NA	NA	NA	NA	NA	NA	NA	-0.0123501	NA	NA	NA	NA	NA	NA	NA	NA	NA	NA	NA	NA	NA	NA	NA	NA	NA	NA	NA	1	0	1	1
chr7:44969483-44969704	MYO1G	NA	NA	NA	NA	NA	NA	NA	NA	NA	NA	NA	NA	NA	-0.0276458	NA	NA	NA	NA	NA	NA	NA	NA	NA	NA	NA	NA	NA	NA	NA	NA	NA	NA	NA	1	0	1	1
chr16:791370-791850	CHTF18	-0.123027	-0.0366764	-0.120693	-0.107746	0.160518	0.606603	0.221688	0.290238	-0.674429	0.0546178	NA	NA	0.478125	-0.0266599	-0.511394	NA	-0.514139	-0.172725	-0.184227	-0.266315	0.597625	NA	0.711609	0.291429	-0.459687	0.04756	0.0774277	-0.0991724	0.668128	0.227836	0.140843	-0.383026	-0.474379	2	1	3	29
chr3:196062939-196064308	TFRC	NA	NA	NA	-0.0106627	NA	NA	0.538109	0.104948	NA	NA	NA	NA	NA	-0.46846	NA	NA	NA	0.335784	NA	NA	NA	NA	NA	NA	NA	NA	0.140311	NA	NA	NA	NA	NA	NA	1	0	1	6
chr2:101011026-101011450	TBC1D8	0.480247	-0.546549	0.0653707	-0.0176034	0.0754687	NA	NA	0.697972	0.869985	0.146876	0.467213	0.150941	-0.300105	0.504014	-0.0199712	-0.0637974	-0.745194	-0.04731	-0.235093	-0.132206	-0.0433087	-0.914853	-0.38978	NA	-0.0993346	-0.465781	-0.12864	0.860618	-0.0956615	-0.3006	0.00653701	0.631291	-0.136051	4	1	5	30
chr9:137256070-137256328	NELFB	NA	-0.00540548	NA	NA	NA	NA	NA	NA	NA	NA	NA	NA	-0.342941	-0.551398	NA	NA	NA	NA	NA	NA	NA	NA	NA	NA	NA	NA	NA	NA	NA	NA	NA	NA	NA	1	0	1	3
chr5:139623461-139626755	UBE2D2	NA	NA	NA	NA	NA	NA	NA	NA	NA	NA	NA	NA	NA	-0.0176888	NA	NA	NA	NA	NA	NA	NA	NA	NA	NA	NA	NA	NA	NA	NA	NA	NA	NA	NA	1	0	1	1
chr22:23882869-23883771	SLC2A11	NA	NA	NA	NA	NA	NA	NA	NA	-0.395515	NA	-0.511873	NA	-0.349297	NA	0.0134536	NA	NA	NA	NA	NA	NA	NA	NA	NA	NA	NA	NA	NA	0.566369	NA	NA	NA	NA	0	1	1	5
chr2:219557618-219557822	OBSL1	0.281131	NA	NA	NA	0.314451	NA	NA	NA	0.245335	NA	NA	NA	0.296052	NA	-0.392409	NA	NA	NA	0.249205	0.646384	NA	0.271785	0.119383	NA	NA	NA	NA	-0.00830105	0.10876	NA	NA	-0.33199	0.138768	1	0	1	13
chr22:42891182-42893456	PACSIN2	NA	NA	NA	NA	NA	NA	NA	NA	NA	NA	NA	NA	NA	-0.0004033	NA	NA	NA	NA	NA	NA	NA	NA	NA	NA	NA	NA	NA	NA	NA	NA	NA	NA	NA	1	0	1	1
chr12:131756644-131764455	SFSWAP	NA	NA	NA	NA	NA	NA	NA	NA	NA	NA	NA	NA	NA	-0.00117213	NA	NA	NA	NA	NA	NA	NA	NA	NA	NA	NA	NA	NA	NA	NA	NA	NA	NA	NA	1	0	1	1
chr4:39874412-39876992	PDS5A	NA	NA	NA	NA	NA	NA	NA	NA	NA	NA	NA	NA	NA	-0.0335115	NA	NA	NA	NA	NA	NA	NA	NA	NA	NA	NA	NA	NA	NA	NA	NA	NA	NA	NA	1	0	1	1
chr9:111932359-111932826	UGCG	NA	NA	NA	NA	NA	NA	NA	0.567403	NA	NA	NA	0.0002192	0.706594	0.514548	NA	NA	NA	NA	NA	NA	NA	NA	NA	NA	NA	NA	0.720858	NA	NA	NA	NA	NA	NA	0	1	1	5
chr19:19303448-19303723	SUGP1	-0.310827	-0.117625	-0.201794	0.663885	-0.105502	0.0691496	0.545198	0.148093	0.595276	-0.185649	0.622036	0.00062091	0.177558	-0.999157	0.0698002	-0.418937	-0.0404955	0.143263	0.231601	0.0851704	-0.0393156	0.264471	0.0692891	NA	-0.00140608	0.28831	0.332877	-0.75485	0.170086	-0.434093	0.204638	0.119683	0.430347	3	1	4	32
chr17:47946393-47946613	PNPO	NA	NA	NA	NA	NA	NA	NA	0.0397017	NA	NA	NA	NA	NA	NA	NA	NA	NA	NA	NA	NA	NA	NA	NA	NA	NA	NA	0.320289	NA	NA	NA	NA	NA	NA	0	1	1	2
chr1:39563922-39564422	PABPC4	NA	NA	NA	NA	NA	NA	NA	-0.540546	0.513441	NA	NA	0.0276004	NA	0.579628	-0.19759	NA	NA	NA	NA	NA	NA	NA	NA	NA	NA	NA	NA	NA	NA	NA	NA	NA	NA	0	1	1	5
chr5:14504593-14507121	TRIO	NA	-0.0127307	0.262018	-0.178223	0.192743	0.0307641	NA	0.247113	-0.408059	NA	NA	0.00602389	-0.725825	-0.0373304	0.351593	NA	0.455646	-0.359572	-0.393532	-0.655084	-0.0641912	0.275832	NA	0.353372	-0.707431	NA	-0.581392	NA	NA	NA	NA	0.165822	NA	2	2	4	21
chr15:44566009-44566216	SPG11	NA	NA	NA	NA	NA	-0.0948477	NA	-0.946755	0.450568	-0.0381246	NA	-0.518846	NA	-0.2783	NA	NA	-0.132428	-0.21868	NA	0.23202	NA	-0.480699	NA	-0.0703424	NA	0.532988	0.181685	-0.455397	NA	NA	NA	NA	NA	1	0	1	14
chr7:149262357-149266334	ZNF783	NA	NA	NA	NA	NA	NA	NA	0.0706106	NA	NA	NA	NA	NA	-0.148645	NA	NA	NA	NA	NA	-0.00112131	NA	NA	NA	NA	NA	NA	NA	NA	NA	NA	NA	NA	NA	1	0	1	3
chr22:40312997-40315282	TNRC6B	NA	NA	NA	NA	NA	NA	NA	NA	NA	NA	NA	NA	NA	-0.00469791	NA	NA	NA	NA	NA	NA	NA	NA	NA	NA	NA	NA	NA	NA	NA	NA	NA	NA	NA	1	0	1	1
chr16:16076401-16079351	ABCC1	NA	NA	NA	NA	NA	NA	NA	NA	NA	NA	NA	NA	NA	-0.00011426	NA	NA	NA	NA	NA	NA	NA	NA	NA	NA	NA	NA	NA	NA	NA	NA	NA	NA	NA	1	0	1	1
chr19:2078679-2085174	MOB3A	NA	NA	NA	NA	NA	NA	NA	NA	NA	NA	NA	NA	NA	-0.0136825	NA	NA	NA	NA	NA	NA	NA	NA	NA	NA	NA	NA	NA	NA	NA	NA	NA	NA	NA	1	0	1	1
chr8:2123365-2123554	MYOM2	NA	NA	NA	NA	NA	NA	NA	NA	NA	NA	NA	NA	NA	NA	-0.0494779	NA	NA	NA	NA	NA	NA	NA	NA	NA	NA	NA	NA	NA	NA	NA	NA	NA	NA	1	0	1	1
chr20:47249439-47262287	ZMYND8	NA	NA	NA	NA	NA	NA	NA	NA	NA	NA	NA	NA	NA	-0.0245376	NA	NA	NA	NA	NA	NA	NA	NA	NA	NA	NA	NA	NA	NA	NA	NA	NA	NA	NA	1	0	1	1
chr11:58527723-58528042	LPXN	NA	NA	-0.746388	-0.827058	-0.400599	NA	NA	0.766564	-0.641435	NA	NA	0.0193519	-0.15542	-0.0495393	-0.143508	NA	0.666538	-0.527203	0.0531365	-0.897893	-0.0778618	NA	NA	NA	0.0866543	-0.663381	0.214798	0.201575	0.416399	-0.486822	NA	NA	-0.513026	1	1	2	21
chr11:67646925-67647515	ACY3	NA	NA	NA	NA	NA	NA	NA	NA	NA	NA	NA	0.00054932	0.0621123	NA	NA	NA	NA	NA	NA	NA	NA	NA	NA	NA	NA	NA	NA	NA	NA	NA	NA	NA	NA	0	1	1	2
chr7:44759460-44760150	ZMIZ2	-0.0884586	-0.00118293	0.38962	0.443856	0.567585	0.0584542	0.293466	0.223349	0.292753	0.289195	-0.501998	0.00079298	0.601374	-0.115294	0.0275101	-0.259486	0.258058	0.301779	-0.304555	0.790514	-0.106486	0.247476	0.0182122	0.337006	-0.756735	-0.780173	0.0288627	-0.0700203	0.799422	0.223106	0.56013	-0.313194	0.656528	1	4	5	33
chr18:45988759-45990721	PSTPIP2	NA	NA	NA	NA	NA	NA	NA	NA	NA	NA	NA	NA	NA	-0.0029942	NA	NA	NA	NA	NA	NA	NA	NA	NA	NA	NA	NA	NA	NA	NA	NA	NA	NA	NA	1	0	1	1
chr14:24441795-24442108	SDR39U1	NA	NA	NA	NA	NA	NA	NA	NA	0.0281309	NA	NA	NA	NA	NA	NA	NA	NA	NA	NA	0.152016	NA	NA	NA	NA	NA	NA	NA	NA	NA	NA	NA	NA	NA	0	1	1	2
chr16:30662859-30664214	FBRS	NA	NA	NA	NA	NA	NA	NA	NA	NA	NA	NA	NA	NA	-0.0446519	NA	NA	NA	NA	NA	NA	NA	NA	NA	NA	NA	NA	NA	NA	NA	NA	NA	NA	NA	1	0	1	1
chr7:128500968-128501761	METTL2B	NA	NA	-0.133755	NA	NA	NA	NA	0.723669	0.471727	NA	NA	8.1e-06	0.453651	-0.00723437	NA	NA	-0.258124	-0.277152	NA	0.886024	-0.129008	NA	NA	NA	NA	NA	-0.586184	NA	NA	NA	NA	NA	NA	1	1	2	11
chr16:8901057-8901141	USP7	NA	NA	NA	NA	NA	NA	NA	NA	NA	NA	NA	NA	NA	-0.0198389	NA	NA	NA	NA	NA	NA	NA	NA	NA	NA	NA	NA	NA	NA	NA	NA	NA	NA	NA	1	0	1	1
chr22:31258426-31259120	LIMK2	NA	NA	-0.0182304	0.308891	NA	0.451501	NA	0.409778	NA	NA	NA	NA	NA	-0.57886	NA	NA	NA	0.164575	NA	-0.32268	-0.390685	NA	NA	0.157339	NA	NA	-0.430898	0.713686	NA	NA	NA	NA	NA	1	0	1	11
chr17:77213492-77213917	SEC14L1	NA	NA	NA	NA	NA	NA	NA	NA	NA	NA	NA	0.0145014	NA	-0.166244	NA	NA	NA	NA	NA	NA	NA	NA	NA	NA	NA	NA	NA	NA	NA	NA	NA	NA	NA	0	1	1	2
chr3:122833446-122845762	SLC49A4	NA	NA	NA	NA	NA	NA	NA	NA	NA	NA	NA	NA	NA	-0.0426702	NA	NA	NA	NA	NA	NA	NA	NA	NA	NA	NA	NA	NA	NA	NA	NA	NA	NA	NA	1	0	1	1
chr12:46365189-46366863	SLC38A2	-0.68786	-0.122228	NA	NA	NA	NA	NA	0.312717	NA	NA	NA	NA	-0.609298	-0.00758301	NA	NA	0.536614	NA	NA	NA	0.310087	NA	NA	NA	NA	NA	NA	NA	NA	NA	NA	NA	NA	1	0	1	7
chr11:6616503-6616660	TPP1	-0.100549	-0.1989	NA	NA	-0.184411	-0.479166	NA	NA	NA	NA	-0.592768	NA	-0.534908	-0.370425	NA	NA	NA	NA	NA	-0.264573	NA	NA	NA	-0.0090138	NA	NA	-0.0486282	NA	NA	NA	NA	-0.222014	NA	2	0	2	11
chr12:50724886-50727702	DIP2B	NA	NA	NA	NA	NA	NA	NA	NA	NA	NA	NA	NA	NA	-0.0221373	NA	NA	NA	NA	NA	NA	NA	NA	NA	NA	NA	NA	NA	NA	NA	NA	NA	NA	NA	1	0	1	1
chr6:42246544-42254850	TRERF1	NA	NA	NA	NA	NA	NA	NA	0.174032	NA	NA	NA	NA	NA	-0.0102921	NA	NA	NA	NA	NA	NA	NA	NA	NA	NA	NA	NA	NA	NA	NA	NA	NA	NA	NA	1	0	1	2
chr15:65456371-65463760	DPP8	NA	NA	NA	NA	NA	NA	NA	NA	NA	NA	NA	NA	NA	-0.0429023	NA	NA	NA	NA	NA	NA	NA	NA	NA	NA	NA	NA	NA	NA	NA	NA	NA	NA	NA	1	0	1	1
chr22:37297682-37299225	CYTH4	NA	NA	NA	NA	NA	NA	NA	NA	NA	NA	NA	NA	NA	-0.00061464	NA	NA	NA	NA	NA	NA	NA	NA	NA	NA	NA	NA	NA	NA	NA	NA	NA	NA	NA	1	0	1	1
chr22:40407843-40408070	SGSM3	-0.0526242	-0.0246937	NA	NA	0.809419	0.173249	0.113641	-0.452844	0.0614776	NA	NA	0.00927287	0.637511	-0.479611	0.478602	-0.0289706	-0.00862674	-0.276994	NA	-0.795393	-0.0565635	0.585476	NA	0.488058	0.416123	0.0769535	0.392436	-0.317777	NA	0.300773	-0.177875	0.634168	NA	3	1	4	25
chr14:102593325-102681894	RCOR1	NA	NA	NA	NA	NA	NA	NA	NA	NA	NA	NA	NA	NA	-0.00772009	NA	NA	NA	NA	NA	NA	NA	NA	NA	NA	NA	NA	NA	NA	NA	NA	NA	NA	NA	1	0	1	1
chr12:8091850-8092675	NECAP1	-0.619084	NA	-0.343738	0.226261	0.266784	NA	-0.617783	0.168135	-0.0654873	NA	NA	0.00230688	NA	-0.0184121	0.170564	NA	-0.0769703	-0.196481	0.73176	-0.213526	-0.517404	0.187939	NA	NA	NA	0.426997	0.651521	-0.505414	-0.752075	NA	NA	NA	-0.184909	1	1	2	21
chr11:1008135-1009099	AP2A2	NA	NA	NA	NA	0.599348	NA	NA	-0.750371	NA	NA	NA	NA	NA	-0.0181885	NA	NA	NA	NA	NA	NA	0.294326	NA	NA	NA	NA	NA	-0.783021	NA	NA	NA	NA	NA	NA	1	0	1	5
chr22:38689424-38699802	JOSD1	NA	NA	NA	NA	NA	NA	NA	NA	NA	NA	NA	NA	NA	-0.0438673	NA	NA	NA	NA	NA	NA	NA	NA	NA	NA	NA	NA	NA	NA	NA	NA	NA	NA	NA	1	0	1	1
chr10:103094455-103095938	NT5C2	NA	NA	NA	NA	NA	NA	NA	NA	NA	NA	NA	NA	NA	-0.0315953	NA	NA	NA	NA	NA	NA	NA	NA	NA	NA	NA	NA	NA	NA	NA	NA	NA	NA	NA	1	0	1	1
chr2:17745951-17753625	SMC6	NA	NA	NA	NA	NA	NA	NA	0.574997	NA	NA	NA	NA	NA	-0.0483181	NA	NA	NA	NA	NA	NA	NA	NA	NA	NA	NA	NA	0.140542	NA	NA	NA	NA	NA	NA	1	0	1	3
chr4:84803467-84809886	WDFY3	NA	NA	NA	NA	NA	NA	NA	0.148505	NA	NA	NA	0.0348339	NA	NA	NA	NA	NA	NA	NA	NA	NA	NA	NA	NA	NA	NA	NA	NA	NA	NA	NA	NA	NA	0	1	1	2
chr12:6594650-6595333	CHD4	NA	NA	NA	NA	NA	NA	NA	NA	NA	NA	NA	NA	NA	-0.00789029	NA	NA	NA	NA	NA	NA	NA	NA	NA	NA	NA	NA	NA	NA	NA	NA	NA	NA	NA	1	0	1	1
chr12:104321316-104325336	TXNRD1	NA	NA	NA	NA	NA	NA	NA	NA	NA	NA	NA	NA	NA	-0.00566445	NA	NA	NA	NA	NA	NA	NA	NA	NA	NA	NA	NA	NA	NA	NA	NA	NA	NA	NA	1	0	1	1
chr12:27003390-27014077	TM7SF3	NA	NA	NA	NA	NA	NA	NA	NA	NA	NA	NA	NA	NA	-0.0311254	NA	NA	NA	NA	NA	NA	NA	NA	NA	NA	NA	NA	NA	NA	NA	NA	NA	NA	NA	1	0	1	1
chr16:67651845-67651920	CARMIL2	NA	NA	NA	NA	NA	NA	NA	NA	NA	NA	NA	NA	NA	-0.0428278	NA	NA	NA	NA	NA	NA	NA	NA	NA	NA	NA	NA	NA	NA	NA	NA	NA	NA	NA	1	0	1	1
chr15:81306545-81308604	IL16	NA	NA	0.533725	NA	NA	NA	0.312938	0.320488	0.0485425	NA	NA	0.188523	NA	-0.0149099	NA	NA	-0.330083	-0.129864	0.185074	0.574501	0.807301	NA	NA	NA	0.071101	0.0271199	-0.527855	0.360139	NA	-0.485239	NA	NA	NA	1	2	3	16
chr6:32858505-32859404	PSMB9	NA	NA	NA	NA	NA	NA	NA	NA	NA	NA	NA	NA	NA	-0.00526276	NA	NA	NA	NA	NA	NA	NA	NA	NA	NA	NA	NA	NA	NA	NA	NA	NA	NA	NA	1	0	1	1
chr14:74055685-74056905	BBOF1	NA	NA	NA	NA	NA	NA	NA	NA	-0.00618947	NA	NA	NA	NA	NA	0.181851	NA	NA	NA	NA	-0.597337	NA	NA	-0.397245	NA	NA	NA	NA	NA	NA	NA	NA	NA	NA	1	0	1	4
chr3:16326876-16357931	RFTN1	NA	NA	NA	NA	NA	NA	NA	NA	NA	NA	NA	NA	NA	-0.00074176	NA	NA	NA	NA	NA	NA	NA	NA	NA	NA	NA	NA	NA	NA	NA	NA	NA	NA	NA	1	0	1	1
chrX:30720095-30720620	GK	NA	NA	NA	NA	NA	NA	NA	0.376479	NA	NA	NA	NA	NA	-0.0177976	NA	NA	NA	NA	NA	NA	NA	NA	NA	NA	NA	NA	0.61891	NA	NA	NA	NA	NA	NA	1	0	1	3
chrX:135294258-135295767	ZNF75D	NA	NA	NA	NA	NA	NA	NA	0.282065	NA	NA	NA	NA	NA	NA	NA	NA	NA	NA	NA	NA	NA	NA	NA	NA	NA	NA	0.0214206	NA	NA	NA	NA	NA	NA	0	1	1	2
chr12:105147146-105149614	WASHC4	NA	NA	NA	NA	NA	NA	NA	0.0384581	NA	NA	NA	0.00316779	NA	-0.36245	NA	NA	NA	NA	NA	NA	NA	NA	NA	NA	NA	NA	0.621431	NA	NA	NA	NA	NA	NA	0	2	2	4
chr7:149730568-149731671	KRBA1	NA	NA	NA	NA	NA	NA	NA	0.456872	-0.109709	NA	NA	0.00145771	NA	NA	-0.360993	NA	NA	NA	NA	-0.600279	NA	NA	NA	NA	NA	NA	NA	NA	NA	NA	NA	NA	NA	0	1	1	5
chr7:100685146-100685343	GIGYF1	NA	NA	NA	NA	0.586122	NA	NA	-0.429693	0.167834	NA	NA	0.954638	NA	-0.0316801	NA	NA	NA	-0.465649	NA	-0.0121683	NA	NA	NA	NA	NA	NA	-0.332241	NA	NA	NA	NA	NA	NA	2	0	2	8
chr10:114439250-114440081	ABLIM1	NA	NA	NA	NA	NA	NA	NA	-0.49622	NA	NA	NA	0.138709	NA	NA	NA	NA	NA	NA	NA	-0.0307993	NA	NA	NA	NA	NA	NA	0.63483	NA	NA	NA	NA	NA	NA	1	0	1	4
chrX:71533336-71536177	OGT	NA	NA	NA	NA	NA	NA	NA	NA	NA	NA	NA	NA	NA	-0.0317522	NA	NA	NA	NA	NA	NA	NA	NA	NA	NA	NA	NA	NA	NA	NA	NA	NA	NA	NA	1	0	1	1
chr3:15427882-15429912	EAF1	NA	NA	NA	NA	NA	NA	NA	NA	NA	NA	NA	NA	NA	-0.00544273	NA	NA	NA	NA	NA	NA	NA	NA	NA	NA	NA	NA	NA	NA	NA	NA	NA	NA	NA	1	0	1	1
chr4:112432581-112435147	ALPK1	NA	NA	NA	NA	NA	NA	NA	0.0374608	NA	NA	NA	NA	NA	-0.0232676	NA	NA	NA	NA	NA	NA	NA	NA	NA	NA	NA	NA	NA	NA	NA	NA	NA	NA	NA	1	1	2	2
chr9:121281562-121301962	GSN	NA	NA	NA	NA	NA	NA	NA	NA	NA	NA	NA	NA	NA	-0.0203988	NA	NA	NA	NA	NA	NA	NA	NA	NA	NA	NA	NA	NA	NA	NA	NA	NA	NA	NA	1	0	1	1
chr2:229805883-229807707	TRIP12	NA	NA	NA	NA	NA	NA	NA	0.0360353	NA	NA	NA	NA	NA	-0.00021508	NA	NA	NA	NA	NA	NA	NA	NA	NA	NA	NA	NA	0.474053	NA	NA	NA	NA	NA	NA	1	1	2	3
chr19:35722472-35722567	KMT2B	NA	NA	NA	NA	NA	NA	NA	0.0426771	NA	NA	NA	NA	NA	-0.392746	NA	NA	NA	NA	NA	NA	NA	NA	NA	NA	NA	NA	0.525188	NA	NA	NA	NA	NA	NA	0	1	1	3
chr11:68793402-68794803	CPT1A	NA	NA	NA	NA	NA	NA	NA	NA	NA	NA	NA	NA	NA	-0.0137876	NA	NA	NA	NA	NA	NA	NA	NA	NA	NA	NA	NA	NA	NA	NA	NA	NA	NA	NA	1	0	1	1
chr9:124899478-124900451	GOLGA1	NA	NA	NA	NA	NA	NA	NA	NA	NA	NA	NA	NA	NA	-0.030909	NA	NA	NA	NA	NA	NA	NA	NA	NA	NA	NA	NA	NA	NA	NA	NA	NA	NA	NA	1	0	1	1
chr16:67185258-67185360	EXOC3L1	-0.00095177	0.748701	-0.0586923	-0.428112	0.319406	NA	NA	0.458433	0.133564	-0.10514	-0.733347	-0.512223	NA	NA	NA	0.1409	0.0738537	0.130573	-0.813804	-0.300417	0.60951	0.429569	-0.855307	NA	-0.139425	NA	0.258405	NA	0.256517	-0.313258	NA	-0.579879	NA	1	0	1	23
chr1:35563909-35565226	NCDN	0.374322	-0.00364436	-0.0659432	0.0688705	0.0460171	NA	-0.413874	0.525008	0.539965	NA	0.975696	0.0312979	0.598419	-0.0912349	0.0265383	NA	-0.0787342	0.105351	0.11491	0.522523	-0.834024	0.998679	NA	NA	0.0760537	0.109867	-0.78721	0.385107	0.293077	-0.0685076	NA	0.293994	NA	1	3	4	26
chr14:90279133-90286353	NRDE2	NA	NA	NA	NA	NA	NA	NA	0.0369841	NA	NA	NA	NA	NA	-0.00404946	NA	NA	NA	NA	NA	NA	NA	NA	NA	NA	NA	NA	NA	NA	NA	NA	NA	NA	NA	1	1	2	2
chr15:50482065-50484274	USP8	NA	NA	NA	NA	NA	NA	NA	NA	NA	NA	NA	NA	NA	-0.00557582	NA	NA	NA	NA	NA	NA	NA	NA	NA	NA	NA	NA	NA	NA	NA	NA	NA	NA	NA	1	0	1	1
chr21:32321944-32322477	URB1	NA	NA	NA	NA	NA	NA	NA	0.11072	NA	NA	NA	NA	NA	-0.0154789	NA	NA	NA	NA	NA	NA	NA	NA	NA	NA	NA	NA	-0.358495	NA	NA	NA	NA	NA	-0.0694007	1	0	1	4
chr2:46958552-46974972	TTC7A	NA	NA	NA	NA	NA	NA	NA	NA	NA	NA	NA	NA	NA	-0.0220309	NA	NA	NA	NA	NA	NA	NA	NA	NA	NA	NA	NA	NA	NA	NA	NA	NA	NA	NA	1	0	1	1
chr15:77479321-77482969	HMG20A	NA	NA	0.542113	NA	NA	NA	NA	-0.492398	0.107808	NA	0.646388	0.0114608	NA	-0.167874	0.252043	NA	-0.135463	NA	NA	-0.322451	NA	NA	NA	NA	NA	0.509471	0.355207	NA	NA	NA	NA	NA	NA	0	1	1	11
chr3:49809464-49809541	UBA7	-0.337384	-0.21573	0.815982	-0.286268	-0.578868	0.368235	0.713867	0.0602606	-0.264947	-0.0878036	0.0975459	0.0208874	-0.286427	-0.0611606	-0.703536	0.251092	-0.068146	-0.304521	0.170268	-0.158317	-0.0546285	0.330005	0.00597444	0.5604	0.501156	0.433069	0.598443	0.231826	0.250128	-0.474636	0.469272	-0.810178	NA	0	2	2	32
chr13:37008835-37009183	EXOSC8	-0.0252296	NA	-0.349849	NA	NA	NA	NA	NA	NA	-0.474517	-0.338451	NA	NA	-0.368745	0.0461698	-0.491101	-0.133556	NA	NA	NA	NA	NA	NA	NA	NA	-0.0246083	NA	NA	NA	NA	NA	NA	NA	2	1	3	9
chr14:64523402-64531860	ZBTB1	NA	NA	0.287734	NA	NA	NA	NA	0.211155	-0.361747	NA	NA	0.0025132	NA	NA	0.00073299	NA	NA	NA	0.572764	-0.12069	NA	NA	NA	NA	NA	NA	0.271111	NA	-0.106056	-0.189881	NA	NA	NA	0	2	2	10
chr10:3782214-3784912	KLF6	NA	-0.0158348	-0.00390679	-0.352454	0.177477	0.100164	NA	0.185989	NA	0.148138	-0.380646	9.458e-05	-0.649669	-0.00416211	NA	NA	-0.23609	-0.857649	-0.231599	0.728273	-0.500018	NA	NA	NA	NA	0.564435	NA	NA	0.556734	NA	NA	NA	NA	3	1	4	18
chr18:2927811-2928590	LPIN2	NA	NA	NA	NA	NA	NA	NA	-0.039022	NA	NA	NA	NA	NA	-0.00241056	NA	NA	NA	NA	NA	NA	NA	NA	NA	NA	NA	NA	NA	NA	NA	NA	NA	NA	NA	2	0	2	2
chr2:240011696-240014738	NDUFA10	NA	NA	NA	NA	NA	NA	NA	0.194686	0.371791	NA	NA	0.0104572	0.165432	0.820176	0.476831	NA	-0.556633	0.559912	NA	0.180138	NA	NA	NA	NA	NA	NA	0.308467	0.405969	NA	NA	NA	NA	NA	0	1	1	11
chr2:232724691-232735154	GIGYF2	NA	NA	NA	NA	NA	NA	NA	NA	NA	NA	NA	NA	NA	-0.0189376	NA	NA	NA	NA	NA	NA	NA	NA	NA	NA	NA	NA	NA	NA	NA	NA	NA	NA	NA	1	0	1	1
chr8:67219560-67224902	ARFGEF1	NA	NA	NA	NA	NA	NA	NA	NA	NA	NA	NA	NA	NA	-0.0150326	NA	NA	NA	NA	NA	-0.0898581	NA	NA	NA	NA	NA	NA	0.160198	NA	NA	NA	NA	NA	NA	1	0	1	3
chr2:86146197-86147701	IMMT	NA	NA	NA	NA	NA	NA	NA	NA	NA	NA	NA	NA	NA	-0.00526419	NA	NA	NA	NA	NA	NA	NA	NA	NA	NA	NA	NA	NA	NA	NA	NA	NA	NA	NA	1	0	1	1
chr17:7909338-7910427	CHD3	-0.0975107	-0.04178	-0.432377	-0.494372	-0.461102	-0.134397	0.258807	0.00296556	-0.495995	0.371033	0.124233	0.00081731	0.126118	-0.00315111	0.0621808	0.0212027	0.0709705	-0.386389	0.106631	-0.667749	0.0145227	0.522409	0.0252222	-0.321353	0.0339663	0.182109	0.0616996	-0.130132	-0.316049	-0.329816	0.0262109	0.134148	-0.713497	2	7	9	33
chr9:137434079-137434202	NOXA1	NA	NA	NA	NA	0.240476	NA	NA	NA	NA	NA	NA	NA	NA	NA	NA	NA	NA	NA	NA	-0.666453	NA	NA	NA	NA	NA	NA	NA	NA	0.598176	0.195251	0.0488152	NA	NA	0	1	1	5
chrX:154464868-154465017	PLXNA3	NA	-0.209519	-0.0289693	0.0843872	-0.511772	-0.244142	NA	-0.667778	-0.145968	NA	-0.986474	0.0184637	-0.0644636	0.347286	0.299403	NA	-0.527978	0.495836	-0.215965	-0.186867	-0.720348	0.998519	0.277629	0.310025	-0.526081	NA	0.109919	NA	0.750104	NA	NA	-0.286258	NA	1	1	2	24
chr7:99562494-99563862	ZNF655	NA	-0.143393	-0.302167	0.367709	0.410993	NA	-0.225008	0.41145	-0.0431562	-0.0525407	0.476245	0.0418585	-0.759543	-0.0213593	0.178307	NA	-0.583672	0.729923	-0.933109	0.327235	-0.47706	NA	NA	NA	-0.142844	-0.403874	0.464887	0.746004	0.482503	-0.0604653	NA	NA	NA	2	1	3	24
chr12:22625586-22643762	ETNK1	NA	NA	NA	NA	NA	NA	NA	NA	NA	NA	NA	NA	NA	-0.0116617	NA	NA	NA	NA	NA	NA	NA	NA	NA	NA	NA	NA	NA	NA	NA	NA	NA	NA	NA	1	0	1	1
chr22:20585267-20585727	MED15	NA	NA	NA	NA	NA	NA	NA	NA	NA	NA	NA	0.00056542	NA	-0.00451341	NA	NA	NA	NA	NA	NA	NA	NA	NA	NA	NA	NA	NA	NA	NA	NA	NA	NA	NA	1	1	2	2
chr11:557097-557398	LMNTD2	NA	-0.336362	-0.633282	0.464325	0.0587112	NA	NA	-0.493388	NA	NA	-0.919658	0.0409714	0.621035	NA	NA	NA	-0.114327	-0.067159	0.567549	0.0285086	0.0655484	NA	0.0759129	NA	NA	NA	0.0936643	NA	-0.391762	-0.273108	NA	NA	NA	0	2	2	17
chr10:128061015-128061678	PTPRE	NA	NA	NA	NA	NA	NA	NA	NA	NA	NA	NA	NA	NA	-0.0145032	NA	NA	NA	NA	NA	NA	NA	NA	NA	NA	NA	NA	NA	NA	NA	NA	NA	NA	NA	1	0	1	1
chr10:101538371-101550698	BTRC	NA	NA	NA	NA	NA	NA	NA	NA	NA	NA	NA	NA	NA	-0.0239523	NA	NA	NA	NA	NA	NA	NA	NA	NA	NA	NA	NA	NA	NA	NA	NA	NA	NA	NA	1	0	1	1
chr7:23187146-23195838	NUP42	-0.0291338	0.305381	-0.0456275	0.376655	0.202783	0.106126	NA	0.654365	-0.680621	NA	-0.775159	0.00552773	-0.349072	0.486291	0.0378767	NA	0.263945	0.396511	0.470751	0.519893	-0.34114	0.123249	0.0270015	0.0843044	-0.427382	-0.0999743	0.450898	-0.385033	0.514017	-0.115853	NA	-0.80719	NA	2	3	5	28
chr14:91307226-91308350	CCDC88C	NA	NA	NA	NA	NA	NA	NA	NA	NA	NA	NA	NA	NA	-0.0229172	NA	NA	NA	NA	NA	NA	NA	NA	NA	NA	NA	NA	NA	NA	NA	NA	NA	NA	NA	1	0	1	1
chr17:16068121-16070164	NCOR1	NA	NA	NA	NA	NA	NA	NA	NA	NA	NA	NA	NA	NA	-0.0013205	NA	NA	NA	NA	NA	NA	NA	NA	NA	NA	NA	NA	NA	NA	NA	NA	NA	NA	NA	1	0	1	1
chr19:18853104-18853251	UPF1	NA	NA	NA	NA	NA	NA	NA	NA	NA	NA	NA	0.00333184	NA	-0.0179142	NA	NA	NA	NA	NA	NA	NA	NA	NA	NA	NA	NA	NA	NA	NA	NA	NA	NA	NA	1	1	2	2
chr13:112826891-112831374	ATP11A	NA	NA	NA	NA	NA	NA	NA	NA	NA	NA	NA	NA	NA	-0.0174619	NA	NA	NA	NA	NA	NA	NA	NA	NA	NA	NA	NA	NA	NA	NA	NA	NA	NA	NA	1	0	1	1
chr2:101271744-101272841	RNF149	NA	NA	NA	NA	NA	NA	NA	NA	NA	NA	NA	0.0212574	NA	NA	NA	NA	NA	NA	NA	NA	NA	NA	NA	NA	NA	NA	NA	NA	NA	NA	NA	NA	NA	0	1	1	1
chr4:105438036-105446382	PPA2	NA	NA	NA	NA	NA	NA	NA	NA	NA	NA	NA	NA	NA	-0.0489874	NA	NA	NA	NA	NA	NA	NA	NA	NA	NA	NA	NA	NA	NA	NA	NA	NA	NA	NA	1	0	1	1
chr19:47258663-47260320	CCDC9	NA	NA	NA	NA	NA	NA	NA	NA	NA	NA	NA	NA	NA	-0.0479715	NA	NA	NA	NA	NA	NA	NA	NA	NA	NA	NA	NA	NA	NA	NA	NA	NA	NA	NA	1	0	1	1
chr17:45264800-45265162	MAP3K14	NA	-0.00786336	0.297537	0.121926	-0.0614712	NA	0.323798	-0.394256	-0.775365	NA	NA	0.00166716	-0.0694422	-0.00043928	0.10335	NA	-0.619538	0.219834	-0.162396	0.45374	0.0395927	NA	NA	NA	0.424566	0.561476	0.390596	-0.578685	-0.482816	-0.0151416	NA	NA	NA	3	2	5	22
chr20:58991075-58991311	NELFCD	0.146514	-0.00366372	NA	NA	0.472671	NA	-0.729723	NA	NA	NA	-0.595971	0.00017047	0.637718	-0.0590034	NA	-0.207027	0.0784009	NA	0.0697325	NA	-0.139207	-0.853388	NA	NA	-0.0261333	NA	0.428051	NA	0.244754	-0.335948	NA	NA	-0.136812	2	1	3	18
chr16:89727325-89729234	ZNF276	NA	NA	NA	NA	NA	NA	NA	NA	NA	NA	NA	NA	NA	-0.00697875	NA	NA	NA	NA	NA	NA	NA	NA	NA	NA	NA	NA	NA	NA	NA	NA	NA	NA	NA	1	0	1	1
chr8:143791440-143791665	SCRIB	-0.355959	-0.100303	0.732584	-0.356923	0.58478	0.24168	0.205088	-0.553045	-0.648188	-0.0996979	NA	0.214248	-0.0472258	NA	-0.0245443	0.0381424	-0.397477	0.603607	0.757221	0.868622	-0.0177015	0.999064	0.0552744	-0.84018	0.436154	0.401674	0.0968637	-0.38136	0.312834	-0.408382	0.846653	0.210153	0.341064	3	1	4	31
chr3:194137048-194137682	HES1	-0.103807	-0.0543436	0.0608727	0.0746886	0.594046	0.334081	NA	0.756415	0.481789	-0.123296	-0.628424	0.00942825	-0.22315	NA	-0.0739932	0.142112	0.667408	-0.705302	0.0204133	NA	-0.0775487	-0.633715	0.0654486	-0.457637	NA	0.444586	NA	0.557256	NA	0.134811	-0.226139	0.363146	NA	0	2	2	26
chr9:133107300-133107987	AL162417.1	NA	NA	NA	NA	NA	NA	NA	NA	NA	NA	NA	NA	NA	-0.00125202	NA	NA	NA	NA	NA	NA	NA	NA	NA	NA	NA	NA	NA	NA	NA	NA	NA	NA	NA	1	0	1	1
chr18:31631146-31638643	B4GALT6	NA	NA	NA	NA	NA	NA	NA	NA	NA	NA	NA	NA	NA	-0.0121419	NA	NA	NA	NA	NA	NA	NA	NA	NA	NA	NA	NA	NA	NA	NA	NA	NA	NA	NA	1	0	1	1
chr10:97757311-97757641	ZFYVE27	NA	NA	NA	NA	0.162401	NA	NA	-0.510711	NA	NA	NA	0.282361	NA	-0.100513	NA	NA	NA	-0.0165456	NA	-0.75464	NA	NA	NA	NA	NA	NA	0.0843103	NA	NA	NA	NA	NA	NA	1	0	1	7
chr2:74527838-74527939	AUP1	-0.121636	-0.00037804	-0.048943	-0.0572206	-0.52679	0.344329	0.0783303	NA	-0.7299	NA	NA	0.0293748	-0.213507	-0.0280665	0.448608	NA	0.0634537	-0.251443	-0.225511	NA	-0.0484435	-0.602735	NA	-0.0941929	-0.207737	0.320885	NA	-0.274205	NA	-0.687055	-0.682478	NA	NA	4	1	5	23
chr19:3547364-3547454	MFSD12	NA	NA	NA	NA	NA	NA	NA	NA	NA	NA	NA	NA	NA	-0.00049297	NA	NA	NA	NA	NA	NA	NA	NA	NA	NA	NA	NA	NA	NA	NA	NA	NA	NA	NA	1	0	1	1
chr14:103133803-103135218	TNFAIP2	NA	NA	NA	NA	NA	NA	NA	NA	NA	NA	NA	NA	NA	-0.00043967	NA	NA	NA	NA	NA	NA	NA	NA	NA	NA	NA	NA	NA	NA	NA	NA	NA	NA	NA	1	0	1	1
chr20:49643650-49646964	B4GALT5	NA	NA	NA	NA	NA	NA	NA	NA	NA	NA	NA	NA	NA	-0.00476373	NA	NA	NA	NA	NA	NA	NA	NA	NA	NA	NA	NA	NA	NA	NA	NA	NA	NA	NA	1	0	1	1
chr11:72010854-72012894	NUMA1	NA	NA	NA	NA	NA	NA	NA	NA	NA	NA	NA	NA	NA	-0.0106868	NA	NA	NA	NA	NA	NA	NA	NA	NA	NA	NA	NA	NA	NA	NA	NA	NA	NA	NA	1	0	1	1
chr12:49102196-49102292	LMBR1L	-0.102853	0.734989	-0.643664	-0.00825996	-0.604704	-0.0832967	0.671861	0.190766	-0.567072	-0.22995	0.70796	-0.276635	-0.126293	-0.85445	0.23791	NA	-0.42462	-0.365304	-0.462945	-0.411708	0.29359	0.300669	0.0092726	0.349084	0.646092	0.0199762	0.646446	0.634712	0.0521455	-0.0194081	NA	0.654477	-0.0215754	3	2	5	31
chr10:74103928-74105050	VCL	NA	NA	NA	NA	NA	NA	NA	NA	NA	NA	NA	NA	NA	-0.0106836	NA	NA	NA	NA	NA	NA	NA	NA	NA	NA	NA	NA	NA	NA	NA	NA	NA	NA	NA	1	0	1	1
chr12:8936964-8937175	PHC1	NA	NA	NA	NA	NA	NA	NA	NA	0.528609	NA	NA	NA	NA	-0.00060428	NA	NA	NA	NA	NA	NA	NA	NA	NA	NA	NA	NA	NA	NA	NA	NA	NA	NA	NA	1	0	1	2
chr17:44110800-44117493	HDAC5	NA	NA	NA	NA	NA	NA	NA	NA	NA	NA	NA	NA	NA	-0.00013713	NA	NA	NA	NA	NA	NA	NA	NA	NA	NA	NA	NA	NA	NA	NA	NA	NA	NA	NA	1	0	1	1
chr5:172054694-172055587	STK10	NA	NA	NA	NA	NA	NA	NA	NA	NA	NA	NA	NA	NA	-0.00482972	NA	NA	NA	NA	NA	NA	NA	NA	NA	NA	NA	NA	NA	NA	NA	NA	NA	NA	NA	1	0	1	1
chr15:75362748-75363998	MAN2C1	-0.170271	-0.310458	-0.0895734	0.331625	0.374035	0.367628	0.564308	-0.4112	0.0848239	0.658137	-0.596162	6.248e-05	0.0820923	-0.91515	0.121251	0.531059	-0.44257	-0.350079	0.329571	0.509682	-0.0610994	0.521524	9.03e-05	-0.118453	-0.507598	0.200905	0.39863	0.864342	0.69122	0.260015	-0.394538	-0.390682	-0.225703	0	2	2	33
chr20:3290217-3294138	C20orf194	NA	NA	NA	NA	NA	NA	NA	NA	NA	NA	NA	NA	NA	-0.0223989	NA	NA	NA	NA	NA	NA	NA	NA	NA	NA	NA	NA	NA	NA	NA	NA	NA	NA	NA	1	0	1	1
chr7:44044820-44050224	DBNL	NA	NA	NA	NA	NA	NA	NA	NA	NA	NA	NA	NA	NA	-0.00168328	NA	NA	NA	NA	NA	NA	NA	NA	NA	NA	NA	NA	NA	NA	NA	NA	NA	NA	NA	1	0	1	1
chr16:1506329-1506483	TELO2	NA	-0.0269268	-0.259385	0.230772	-0.509671	NA	0.065707	-0.247804	NA	NA	NA	NA	0.139979	-0.297098	NA	NA	-0.163734	-0.613402	0.774878	-0.571136	0.200399	0.925981	0.348703	NA	NA	-0.370296	0.270579	-0.0958906	0.840761	-0.68832	NA	-0.402827	-0.185354	1	0	1	22
chr7:26208555-26211661	CBX3	NA	NA	NA	NA	NA	NA	NA	NA	NA	NA	NA	NA	NA	-0.00657522	NA	NA	NA	NA	NA	NA	NA	NA	NA	NA	NA	NA	NA	NA	NA	NA	NA	NA	NA	1	0	1	1
chr7:73607420-73607589	MLXIPL	NA	NA	NA	NA	NA	NA	NA	NA	NA	NA	NA	NA	NA	NA	NA	0.0364747	NA	NA	NA	NA	NA	NA	NA	NA	NA	NA	0.17127	NA	NA	NA	NA	NA	NA	0	1	1	2
chr12:132139924-132140097	DDX51	NA	NA	NA	NA	NA	NA	NA	-0.095234	NA	NA	NA	NA	NA	-0.0285012	NA	NA	NA	NA	NA	NA	NA	NA	NA	NA	NA	NA	NA	NA	NA	NA	NA	NA	NA	1	0	1	2
chr2:101286177-101288972	RNF149	NA	-0.372639	-0.0629084	-0.5606	0.990576	0.39936	NA	0.778967	NA	NA	NA	0.384104	-0.0794946	0.897044	NA	NA	-0.503623	0.672671	-0.384529	-0.452811	0.519253	NA	0.0255384	0.233252	NA	-0.84766	0.315942	-0.16979	0.308301	-0.294633	NA	NA	NA	0	1	1	21
chr2:9491151-9492897	ADAM17	NA	-0.195459	0.547263	-0.367223	-0.915883	NA	NA	0.287345	NA	NA	0.201093	-0.132509	-0.198698	-0.0274523	-0.00529098	NA	-0.565415	0.675563	-0.674641	NA	-0.00394048	0.823246	0.843911	NA	-0.483016	NA	-0.463757	0.12309	0.555374	NA	NA	-0.854131	NA	3	0	3	21
chr19:48215384-48221729	CARD8	NA	NA	NA	NA	NA	NA	NA	NA	NA	NA	NA	NA	NA	-0.0253118	NA	NA	NA	NA	NA	NA	NA	NA	NA	NA	NA	NA	NA	NA	NA	NA	NA	NA	NA	1	0	1	1
chr8:144440870-144440965	TONSL	NA	0.346903	-0.157946	-0.569114	-0.721808	0.190594	-0.27407	0.607163	0.543123	0.133508	NA	NA	NA	-0.0468194	NA	NA	0.402321	-0.624979	-0.0124773	-0.542807	-0.198918	NA	-0.5465	0.0206045	-0.335041	-0.798506	0.0672887	0.133552	NA	-0.422768	-0.731137	0.945664	0.0989719	2	1	3	25
chr4:68318862-68320122	YTHDC1	-0.12596	-0.0193525	NA	-0.3835	NA	NA	NA	-0.36894	NA	NA	NA	3.67e-06	0.419131	-0.235893	NA	NA	0.479331	0.231456	NA	NA	0.552098	NA	NA	NA	NA	NA	-0.894393	NA	NA	NA	NA	NA	NA	1	1	2	11
chr12:122135666-122137468	MLXIP	NA	NA	NA	NA	NA	NA	NA	0.511664	NA	NA	NA	NA	NA	-0.0331684	NA	NA	NA	NA	NA	-0.093998	NA	NA	NA	NA	NA	NA	-0.22326	NA	NA	NA	NA	NA	NA	1	0	1	4
chr2:219214498-219214960	ABCB6	NA	NA	NA	0.23504	NA	NA	NA	0.741793	-0.463947	NA	NA	7.335e-05	NA	NA	0.193724	NA	-0.169531	-0.343774	-0.363401	NA	NA	-0.817654	NA	NA	0.755837	0.66114	-0.0360402	NA	NA	NA	NA	-0.771757	-0.0742554	1	1	2	14
chr9:129863299-129865302	USP20	NA	NA	NA	NA	NA	NA	NA	NA	NA	NA	NA	NA	NA	-0.0490555	NA	NA	NA	NA	NA	NA	NA	NA	NA	NA	NA	NA	NA	NA	NA	NA	NA	NA	NA	1	0	1	1
chr17:81914167-81914293	SIRT7	0.295825	-0.468211	-0.658	0.343803	-0.140006	0.274985	-0.187594	0.425728	0.0327741	-0.238323	0.779586	0.00104807	-0.0827257	0.971211	0.0229715	-0.0821852	-0.451176	-0.453207	-0.354694	-0.819076	-0.311221	-0.322341	0.158411	-0.503191	-0.332741	0.364369	0.380894	0.744983	0.312782	-0.467815	-0.761646	-0.385896	0.37939	0	3	3	33
chr22:50457111-50459254	SBF1	NA	NA	NA	-0.812733	0.184886	NA	NA	0.605606	NA	NA	NA	0.290861	0.368388	-0.161052	NA	NA	-0.445408	-0.0562041	NA	-0.431888	0.0177398	0.998674	NA	NA	NA	NA	0.178358	NA	0.140736	0.359883	NA	NA	NA	0	1	1	14
chr12:112228258-112228646	HECTD4	NA	NA	NA	NA	NA	NA	NA	0.269018	NA	NA	NA	NA	NA	-0.856457	NA	NA	NA	NA	NA	-0.0045052	NA	NA	NA	NA	NA	NA	0.141977	NA	NA	NA	NA	NA	NA	1	0	1	4
chr12:96247734-96259730	ELK3	NA	NA	NA	NA	NA	NA	NA	NA	NA	NA	NA	NA	NA	-0.0235444	NA	NA	NA	NA	NA	NA	NA	NA	NA	NA	NA	NA	NA	NA	NA	NA	NA	NA	NA	1	0	1	1
chr1:151303650-151306135	PI4KB	NA	NA	NA	NA	NA	NA	NA	NA	NA	NA	NA	NA	NA	-0.00283375	NA	NA	NA	NA	NA	NA	NA	NA	NA	NA	NA	NA	NA	NA	NA	NA	NA	NA	NA	1	0	1	1
chr16:84060813-84063304	MBTPS1	-0.271434	-0.00186836	NA	NA	-0.226083	0.429835	0.165742	0.139551	0.917966	NA	NA	0.00734767	-0.590684	0.0991569	-0.54738	NA	0.0463593	0.318519	NA	NA	NA	0.198299	NA	-0.111584	NA	0.656278	NA	0.395819	NA	0.112247	NA	NA	0.543743	1	2	3	19
chr11:66526807-66529818	AP002748.5	NA	NA	NA	NA	NA	NA	NA	0.293544	NA	NA	NA	NA	NA	-0.3215	NA	NA	NA	NA	NA	-0.00123717	NA	NA	NA	NA	NA	NA	0.471182	NA	NA	NA	NA	NA	NA	1	0	1	4
chr11:60385222-60386716	MS4A7	NA	NA	-0.0424306	NA	NA	NA	NA	NA	NA	NA	-0.218482	0.0366213	NA	-0.441224	NA	NA	NA	NA	NA	NA	NA	NA	NA	NA	NA	NA	0.479562	NA	NA	NA	NA	NA	NA	1	1	2	5
chr22:21629187-21629307	YDJC	-0.177998	-0.860925	-0.304668	-0.380941	0.427681	0.485372	-0.336072	-0.145507	-0.339824	-0.431673	0.0434954	0.107243	-0.471706	-0.0503146	NA	NA	0.080345	-0.258635	-0.616952	-0.482574	-0.0230947	NA	0.111104	-0.523922	-0.97353	0.690625	-0.613708	-0.193453	0.338765	-0.221739	-0.103177	0.387779	-0.198957	1	1	2	30
chr2:151468146-151468473	RIF1	NA	NA	NA	NA	NA	NA	NA	0.174941	NA	NA	NA	NA	NA	-0.0360952	NA	NA	NA	NA	NA	NA	NA	NA	NA	NA	NA	NA	-0.626937	NA	NA	NA	NA	NA	NA	1	0	1	3
chr9:86288744-86301275	TUT7	NA	NA	NA	NA	NA	NA	NA	-0.128123	NA	NA	NA	NA	NA	-0.0679935	NA	NA	NA	NA	NA	-0.00690112	NA	NA	NA	NA	NA	NA	0.429262	NA	NA	NA	NA	NA	NA	1	0	1	4
chr2:131071938-131082576	FAM168B	NA	NA	NA	NA	NA	NA	NA	NA	NA	NA	NA	NA	NA	-0.0016127	NA	NA	NA	NA	NA	NA	NA	NA	NA	NA	NA	NA	NA	NA	NA	NA	NA	NA	NA	1	0	1	1
chr7:139417729-139422162	FMC1-LUC7L2	-0.145538	-0.289929	0.111311	-0.592896	0.193184	-0.499329	0.0940758	-0.564639	0.13706	-0.565286	-0.329961	0.0046059	-0.70022	-0.231952	0.00201454	-0.200117	-0.328279	-0.0844212	-0.305616	-0.461041	-0.528759	-0.299039	-0.837804	0.48609	-0.216823	0.16108	0.113064	0.734848	0.0125202	-0.603662	0.0599543	-0.0676548	0.0347156	0	4	4	33
chr17:64064151-64065208	ERN1	NA	NA	NA	NA	NA	NA	NA	NA	NA	NA	NA	NA	NA	-0.0369591	NA	NA	NA	NA	NA	NA	NA	NA	NA	NA	NA	NA	NA	NA	NA	NA	NA	NA	NA	1	0	1	1
chr10:122998671-123007025	IKZF5	NA	NA	NA	NA	NA	NA	NA	0.0418175	NA	NA	NA	NA	NA	-0.179412	NA	NA	NA	NA	NA	NA	NA	NA	NA	NA	NA	NA	NA	NA	NA	NA	NA	NA	NA	0	1	1	2
chr7:75987602-75987717	TMEM120A	0.626545	-0.033892	-0.16246	-0.414919	-0.544815	0.21391	-0.631402	0.355928	0.598552	-0.0429622	NA	0.0012543	0.382453	-0.0365977	0.421429	NA	0.620665	-0.585008	-0.48287	-0.0373784	-0.0205065	-0.27585	0.00036469	0.961519	-0.630018	0.33396	-0.162438	-0.735081	NA	-0.332834	0.703121	0.256595	NA	5	2	7	29
chr11:619180-619305	CDHR5	NA	NA	NA	NA	NA	0.436615	NA	NA	NA	NA	NA	0.00761136	-0.0950548	NA	NA	0.383049	NA	NA	NA	NA	0.521103	NA	NA	-0.215413	NA	NA	-0.217061	NA	NA	NA	NA	NA	NA	0	1	1	7
chr17:1083627-1091664	ABR	NA	NA	NA	NA	NA	NA	NA	NA	NA	NA	NA	NA	NA	-0.0393349	NA	NA	NA	NA	NA	NA	NA	NA	NA	NA	NA	NA	NA	NA	NA	NA	NA	NA	NA	1	0	1	1
chr11:67421219-67423374	CARNS1	NA	NA	NA	NA	NA	NA	NA	NA	NA	NA	NA	NA	NA	NA	-0.0497613	NA	NA	NA	0.00012326	NA	NA	NA	NA	NA	NA	NA	NA	NA	0.182599	NA	NA	NA	NA	1	1	2	3
chr12:55757553-55760550	AC023055.1	NA	NA	NA	NA	NA	NA	NA	NA	NA	NA	NA	NA	NA	-0.0134637	NA	NA	NA	NA	NA	NA	NA	NA	NA	NA	NA	NA	NA	NA	NA	NA	NA	NA	NA	1	0	1	1
chr11:119131646-119131829	HINFP	NA	NA	NA	NA	NA	NA	NA	0.0382076	-0.401354	NA	NA	0.0265723	NA	-0.308619	NA	NA	NA	NA	NA	NA	NA	NA	NA	NA	NA	NA	0.0344369	NA	NA	NA	NA	NA	NA	0	3	3	5
chr16:66728242-66729039	DYNC1LI2	NA	NA	NA	NA	NA	NA	NA	NA	NA	NA	NA	NA	NA	-0.0127555	NA	NA	NA	NA	NA	NA	NA	NA	NA	NA	NA	NA	NA	NA	NA	NA	NA	NA	NA	1	0	1	1
chr22:38069122-38070837	PICK1	NA	NA	NA	NA	NA	NA	NA	NA	NA	NA	NA	NA	NA	-0.00446517	NA	NA	NA	NA	NA	NA	NA	NA	NA	NA	NA	NA	NA	NA	NA	NA	NA	NA	NA	1	0	1	1
chr16:16016621-16033108	ABCC1	NA	NA	NA	NA	NA	NA	NA	NA	NA	NA	NA	NA	NA	-0.0436232	NA	NA	NA	NA	NA	NA	NA	NA	NA	NA	NA	NA	NA	NA	NA	NA	NA	NA	NA	1	0	1	1
chr19:54455092-54455363	LENG8	NA	NA	NA	NA	NA	NA	NA	NA	NA	NA	NA	NA	NA	-0.0315332	NA	NA	NA	NA	NA	NA	NA	NA	NA	NA	NA	NA	NA	NA	NA	NA	NA	NA	NA	1	0	1	1
chrX:47239481-47239789	USP11	NA	NA	NA	NA	NA	NA	NA	NA	NA	NA	NA	NA	NA	-0.027365	NA	NA	NA	NA	NA	NA	NA	NA	NA	NA	NA	NA	NA	NA	NA	NA	NA	NA	NA	1	0	1	1
chr17:78205738-78205945	AFMID	NA	-0.164522	-0.174445	0.545407	-0.453551	0.0168455	0.157427	0.239056	NA	NA	NA	0.00818861	0.239185	0.94226	NA	0.277168	0.587053	-0.422743	NA	-0.523267	-0.062429	NA	0.0413542	-0.0656845	NA	NA	-0.394193	NA	0.109547	-0.229522	NA	-0.958222	0.757605	0	3	3	22
chr15:42345832-42348102	GANC	NA	NA	NA	NA	NA	NA	NA	NA	NA	NA	NA	NA	NA	-0.00707619	NA	NA	NA	NA	NA	NA	NA	NA	NA	NA	NA	NA	NA	NA	NA	NA	NA	NA	NA	1	0	1	1
chr3:48576919-48576991	COL7A1	NA	-0.234204	NA	-0.0353408	NA	NA	NA	0.397722	NA	NA	NA	NA	NA	NA	NA	NA	NA	-0.15045	NA	NA	NA	NA	NA	NA	-0.0993759	NA	NA	NA	NA	NA	NA	NA	NA	1	0	1	5
chr13:25319350-25320529	NUP58	NA	NA	NA	NA	NA	NA	NA	0.267402	NA	NA	NA	0.00084557	NA	-0.892409	NA	NA	NA	NA	NA	NA	NA	NA	NA	NA	NA	NA	-0.294587	NA	NA	NA	NA	NA	NA	0	1	1	4
chr1:17422836-17425540	RCC2	NA	NA	NA	NA	NA	NA	NA	NA	NA	NA	NA	NA	NA	-0.00035766	NA	NA	NA	NA	NA	NA	NA	NA	NA	NA	NA	NA	NA	NA	NA	NA	NA	NA	NA	1	0	1	1
chr1:167630429-167683899	RCSD1	NA	NA	NA	NA	NA	NA	NA	NA	NA	NA	NA	NA	NA	-0.0133648	NA	NA	NA	NA	NA	NA	NA	NA	NA	NA	NA	NA	NA	NA	NA	NA	NA	NA	NA	1	0	1	1
chr2:96144373-96144760	DUSP2	NA	-0.372033	NA	NA	NA	NA	0.157551	-0.436521	NA	NA	NA	0.0338314	NA	-0.0656149	NA	NA	NA	NA	NA	0.522231	NA	NA	NA	NA	NA	NA	0.353502	NA	NA	0.0717829	NA	NA	NA	0	1	1	8
chr6:97263448-97267871	MMS22L	NA	NA	NA	NA	NA	NA	NA	NA	NA	NA	NA	NA	NA	-0.00168376	NA	NA	NA	NA	NA	NA	NA	NA	NA	NA	NA	NA	NA	NA	NA	NA	NA	NA	NA	1	0	1	1
chr2:227524915-227531090	AGFG1	NA	NA	NA	NA	NA	NA	NA	NA	NA	NA	NA	NA	NA	-0.0271849	NA	NA	NA	NA	NA	NA	NA	NA	NA	NA	NA	NA	NA	NA	NA	NA	NA	NA	NA	1	0	1	1
chr11:3020332-3026675	CARS1	NA	NA	NA	NA	NA	NA	NA	NA	NA	NA	NA	NA	NA	-0.00411703	NA	NA	NA	NA	NA	NA	NA	NA	NA	NA	NA	NA	NA	NA	NA	NA	NA	NA	NA	1	0	1	1
chr10:110130486-110132304	ADD3	NA	NA	NA	NA	NA	NA	NA	NA	NA	NA	NA	NA	NA	-0.00985843	NA	NA	NA	NA	NA	NA	NA	NA	NA	NA	NA	NA	NA	NA	NA	NA	NA	NA	NA	1	0	1	1
chr1:51366029-51394380	EPS15	NA	NA	NA	NA	NA	NA	NA	NA	NA	NA	NA	NA	NA	-0.00226404	NA	NA	NA	NA	NA	NA	NA	NA	NA	NA	NA	NA	NA	NA	NA	NA	NA	NA	NA	1	0	1	1
chr17:7895150-7895338	CHD3	NA	NA	NA	NA	NA	NA	NA	NA	NA	NA	NA	NA	NA	-0.00690858	NA	NA	NA	NA	NA	NA	NA	NA	NA	NA	NA	NA	NA	NA	NA	NA	NA	NA	NA	1	0	1	1
chr3:47638780-47661293	SMARCC1	NA	NA	NA	NA	NA	NA	NA	NA	NA	NA	NA	NA	NA	-0.0204775	NA	NA	NA	NA	NA	NA	NA	NA	NA	NA	NA	NA	NA	NA	NA	NA	NA	NA	NA	1	0	1	1
chr10:97460751-97460906	MMS19	NA	NA	NA	NA	NA	NA	NA	NA	NA	NA	NA	NA	NA	-0.0895027	NA	NA	-0.0370668	NA	NA	NA	NA	NA	NA	NA	NA	NA	0.857986	NA	NA	NA	NA	NA	NA	1	0	1	3
chr17:42671558-42672085	PLEKHH3	NA	-0.00681376	NA	NA	NA	NA	NA	-0.497154	NA	NA	NA	0.290364	NA	NA	NA	NA	NA	NA	NA	0.441762	NA	0.99907	NA	NA	NA	NA	0.535365	NA	NA	NA	NA	NA	NA	1	0	1	6
chr3:129492194-129495445	IFT122	NA	NA	NA	NA	NA	NA	NA	NA	NA	NA	NA	NA	NA	-0.0324168	NA	NA	NA	NA	NA	NA	NA	NA	NA	NA	NA	NA	NA	NA	NA	NA	NA	NA	NA	1	0	1	1
chr5:76683917-76693354	IQGAP2	NA	NA	NA	NA	NA	NA	NA	NA	NA	NA	NA	NA	NA	-0.00067965	NA	NA	NA	NA	NA	NA	NA	NA	NA	NA	NA	NA	NA	NA	NA	NA	NA	NA	NA	1	0	1	1
chr7:103311896-103312055	PMPCB	NA	NA	NA	NA	NA	NA	NA	NA	NA	NA	NA	NA	NA	-0.0426223	NA	NA	NA	NA	NA	NA	NA	NA	NA	NA	NA	NA	NA	NA	NA	NA	NA	NA	NA	1	0	1	1
chr13:20006586-20019546	ZMYM2	NA	NA	NA	NA	NA	NA	NA	NA	NA	NA	NA	NA	NA	-0.00436638	NA	NA	NA	NA	NA	NA	NA	NA	NA	NA	NA	NA	NA	NA	NA	NA	NA	NA	NA	1	0	1	1
chr6:147327276-147334156	STXBP5	NA	NA	NA	NA	NA	NA	NA	NA	NA	NA	NA	NA	NA	-0.00455033	NA	NA	NA	NA	NA	NA	NA	NA	NA	NA	NA	NA	NA	NA	NA	NA	NA	NA	NA	1	0	1	1
chr1:19097280-19099596	UBR4	NA	NA	NA	NA	NA	NA	NA	NA	NA	NA	NA	NA	NA	-0.0302503	NA	NA	NA	NA	NA	NA	NA	NA	NA	NA	NA	NA	NA	NA	NA	NA	NA	NA	NA	1	0	1	1
chr19:11105600-11106564	LDLR	NA	NA	NA	NA	NA	NA	NA	NA	NA	NA	NA	NA	NA	-0.04698	NA	NA	NA	NA	NA	NA	NA	NA	NA	NA	NA	NA	0.59038	NA	NA	NA	NA	NA	NA	1	0	1	2
chr4:102802638-102809671	UBE2D3	NA	NA	NA	NA	NA	NA	NA	NA	NA	NA	NA	NA	NA	-0.0006478	NA	NA	NA	NA	NA	NA	NA	NA	NA	NA	NA	NA	NA	NA	NA	NA	NA	NA	NA	1	0	1	1
chr19:45271708-45277922	MARK4	NA	NA	NA	NA	NA	NA	NA	NA	NA	NA	NA	NA	NA	-0.034095	NA	NA	NA	NA	NA	NA	NA	NA	NA	NA	NA	NA	NA	NA	NA	NA	NA	NA	NA	1	0	1	1
chr17:80049989-80050063	CCDC40	NA	NA	NA	NA	NA	NA	NA	NA	0.124233	NA	NA	0.0215444	0.161203	NA	NA	NA	NA	NA	NA	-0.793825	NA	NA	NA	NA	NA	NA	NA	NA	NA	NA	NA	NA	NA	0	1	1	4
chr10:87864548-87894024	PTEN	NA	NA	NA	NA	NA	NA	NA	NA	NA	NA	NA	NA	NA	-0.01906	NA	NA	NA	NA	NA	NA	NA	NA	NA	NA	NA	NA	NA	NA	NA	NA	NA	NA	NA	1	0	1	1
chr1:223764207-223766366	CAPN2	NA	NA	NA	NA	NA	NA	NA	NA	NA	NA	NA	NA	NA	-0.00920741	NA	NA	NA	NA	NA	NA	NA	NA	NA	NA	NA	NA	NA	NA	NA	NA	NA	NA	NA	1	0	1	1
chr7:852667-852809	SUN1	-0.397084	-0.00316653	-0.310969	-0.104469	0.419722	0.37169	0.54226	-0.719568	0.722064	0.294446	0.447188	0.0052634	-0.631818	-0.574929	0.0933963	0.333463	-0.0588019	-0.279974	-0.382462	-0.237286	-0.0430894	-0.291893	0.0796801	0.424146	0.85842	0.371747	-0.266078	0.569054	0.619879	0.286069	-0.562321	0.468546	-0.323429	2	1	3	33
chr16:89721845-89722530	ZNF276	NA	NA	NA	NA	NA	NA	NA	0.132731	NA	NA	NA	NA	NA	-0.0213606	-0.404234	NA	NA	NA	NA	0.370029	NA	NA	NA	NA	NA	NA	-0.743941	NA	NA	0.414538	NA	NA	NA	1	0	1	6
chr11:66364424-66365935	SLC29A2	NA	0.0723339	-0.0969774	-0.363574	0.685182	0.744973	NA	-0.204756	0.206148	0.0516639	-0.501998	NA	0.707873	NA	0.488722	NA	-0.373152	-0.175093	NA	0.794459	-0.046249	-0.999339	-0.0984651	-0.107549	NA	NA	0.329314	-0.149811	0.275541	0.813823	-0.119478	-0.231123	NA	1	0	1	24
chr17:28620015-28620508	KIAA0100	NA	NA	NA	NA	NA	NA	NA	NA	NA	NA	NA	NA	NA	-0.00370594	NA	NA	NA	NA	NA	NA	NA	NA	NA	NA	NA	NA	NA	NA	NA	NA	NA	NA	NA	1	0	1	1
chr9:2650516-2651873	VLDLR	NA	NA	NA	NA	NA	NA	NA	0.286567	NA	NA	NA	NA	NA	NA	NA	NA	NA	NA	0.796864	NA	NA	NA	NA	NA	NA	-0.107343	NA	NA	NA	NA	NA	NA	0.0345974	0	1	1	4
chrY:19708071-19708243	KDM5D	NA	NA	NA	NA	NA	NA	NA	NA	NA	NA	NA	NA	NA	NA	NA	NA	NA	NA	NA	NA	NA	NA	0.0141616	NA	NA	NA	NA	0.833681	NA	NA	NA	NA	NA	0	1	1	2
chr12:22457161-22458483	C2CD5	NA	NA	-0.0850457	-0.518032	0.191313	NA	NA	0.366768	NA	NA	NA	0.0146643	-0.11825	NA	NA	NA	NA	NA	NA	NA	0.600486	-0.995517	NA	NA	NA	-0.0631076	-0.508987	-0.0123608	-0.214415	-0.171584	NA	NA	NA	1	1	2	13
chr1:77722196-77723330	USP33	NA	NA	NA	-0.447273	NA	NA	NA	0.482146	NA	NA	NA	0.00610767	-0.225037	-0.0199005	NA	NA	-0.640922	-0.328254	NA	-0.213957	NA	NA	NA	NA	NA	NA	-0.354157	NA	NA	NA	NA	NA	NA	1	1	2	9
chr10:125039155-125160318	CTBP2	NA	NA	NA	NA	NA	NA	NA	NA	NA	NA	NA	NA	NA	-0.0079326	NA	NA	NA	NA	NA	NA	NA	NA	NA	NA	NA	NA	NA	NA	NA	NA	NA	NA	NA	1	0	1	1
chr7:35635458-35638349	HERPUD2	NA	NA	0.621568	NA	NA	NA	0.998996	0.421563	-0.144563	NA	NA	0.00629585	-0.134507	-0.113629	0.43234	NA	-0.606144	0.85541	NA	NA	-0.428798	NA	NA	NA	NA	NA	NA	NA	0.553351	NA	NA	NA	NA	0	1	1	12
chr7:131478677-131487606	MKLN1	NA	NA	NA	NA	NA	NA	NA	-0.0321106	NA	NA	NA	NA	NA	-0.0837379	NA	NA	NA	NA	NA	NA	NA	NA	NA	NA	NA	NA	0.0496289	NA	NA	NA	NA	NA	NA	1	1	2	3
chrX:20172868-20175163	RPS6KA3	NA	NA	NA	NA	NA	NA	NA	NA	NA	NA	NA	NA	NA	-0.00646289	NA	NA	NA	NA	NA	NA	NA	NA	NA	NA	NA	NA	NA	NA	NA	NA	NA	NA	NA	1	0	1	1
chr19:42316963-42317708	TMEM145	NA	NA	NA	NA	NA	NA	NA	NA	-0.373671	NA	NA	NA	NA	NA	0.0206194	NA	NA	NA	NA	NA	NA	NA	NA	NA	NA	NA	NA	NA	NA	NA	NA	NA	NA	0	1	1	2
chr3:23811510-23887566	UBE2E1	NA	NA	NA	NA	NA	NA	NA	NA	NA	NA	NA	NA	NA	-0.00047279	NA	NA	NA	NA	NA	NA	NA	NA	NA	NA	NA	NA	NA	NA	NA	NA	NA	NA	NA	1	0	1	1
chr11:67645887-67646807	ACY3	NA	NA	NA	NA	NA	NA	NA	NA	NA	NA	NA	0.00165528	-0.0354432	0.516131	NA	NA	NA	NA	NA	NA	NA	NA	NA	NA	NA	NA	0.091171	NA	NA	NA	NA	NA	NA	1	1	2	4
chr7:23196766-23199457	NUP42	NA	NA	NA	NA	NA	NA	NA	0.495405	NA	NA	NA	NA	NA	-0.0485669	NA	NA	NA	NA	NA	NA	NA	NA	NA	NA	NA	NA	NA	NA	NA	NA	NA	NA	NA	1	0	1	2
chr3:39145256-39146477	CSRNP1	NA	NA	NA	NA	NA	NA	NA	-0.261602	NA	NA	NA	0.00044766	NA	-6.78e-06	NA	NA	NA	NA	NA	NA	NA	NA	NA	NA	NA	NA	-0.0631209	NA	NA	NA	NA	NA	NA	1	1	2	4
chr1:145917018-145917700	PEX11B	NA	NA	NA	NA	NA	NA	NA	NA	NA	NA	NA	NA	NA	-0.00047533	NA	NA	NA	NA	NA	NA	NA	NA	NA	NA	NA	NA	NA	NA	NA	NA	NA	NA	NA	1	0	1	1
chr4:955483-955754	TMEM175	NA	-0.0623004	NA	0.095353	0.624612	NA	NA	0.0909902	-0.334312	NA	NA	0.00448204	-0.185437	-0.0784438	NA	NA	-0.294828	-0.351489	0.201871	-0.803049	0.398338	NA	NA	NA	NA	NA	0.291144	NA	NA	NA	NA	-0.649097	NA	0	1	1	15
chr21:45516140-45525816	SLC19A1	NA	NA	NA	NA	NA	NA	NA	NA	NA	NA	NA	NA	NA	-0.0312322	NA	NA	NA	NA	NA	NA	NA	NA	NA	NA	NA	NA	NA	NA	NA	NA	NA	NA	NA	1	0	1	1
chrX:110003178-110003500	TMEM164	NA	NA	NA	NA	NA	NA	NA	NA	NA	NA	NA	NA	NA	-0.0361101	NA	NA	NA	NA	NA	NA	NA	NA	NA	NA	NA	NA	NA	NA	NA	NA	NA	NA	NA	1	0	1	1
chr20:20032653-20033101	NAA20	NA	NA	NA	NA	NA	NA	NA	NA	NA	NA	NA	NA	NA	-0.00280659	NA	NA	NA	NA	NA	NA	NA	NA	NA	NA	NA	NA	0.53268	NA	NA	NA	NA	NA	NA	1	0	1	2
chr10:73825347-73837467	CAMK2G	NA	NA	NA	NA	NA	NA	NA	NA	NA	NA	NA	NA	NA	-0.0169426	NA	NA	NA	NA	NA	NA	NA	NA	NA	NA	NA	NA	NA	NA	NA	NA	NA	NA	NA	1	0	1	1
chr1:153953606-153954254	CRTC2	NA	NA	NA	NA	NA	NA	NA	NA	NA	NA	NA	NA	NA	-0.0397409	NA	NA	NA	NA	NA	NA	NA	NA	NA	NA	NA	NA	NA	NA	NA	NA	NA	NA	NA	1	0	1	1
chr9:90864667-90865047	SYK	NA	NA	NA	NA	NA	NA	NA	NA	NA	NA	NA	NA	NA	-0.0322154	NA	NA	NA	NA	NA	NA	NA	NA	NA	NA	NA	NA	NA	NA	NA	NA	NA	NA	NA	1	0	1	1
chr17:7229678-7229807	DVL2	NA	NA	NA	NA	NA	NA	NA	NA	-0.580783	NA	NA	NA	NA	-0.108972	0.00271314	NA	NA	NA	NA	NA	NA	NA	NA	NA	-0.06096	NA	-0.444143	NA	NA	NA	NA	NA	NA	0	1	1	5
chr2:171006643-171006799	TLK1	NA	NA	NA	NA	NA	NA	NA	NA	NA	NA	NA	NA	NA	-0.035015	NA	NA	NA	NA	NA	NA	NA	NA	NA	NA	NA	NA	NA	NA	NA	NA	NA	NA	NA	1	0	1	1
chr1:156970043-156976982	ARHGEF11	NA	NA	NA	NA	NA	NA	NA	0.0484657	NA	NA	NA	NA	NA	NA	NA	NA	NA	NA	NA	NA	NA	NA	NA	NA	NA	NA	NA	NA	NA	NA	NA	NA	NA	0	1	1	1
chr19:17501419-17504454	SLC27A1	NA	NA	NA	NA	NA	NA	NA	0.0972478	NA	NA	NA	NA	NA	-0.0485257	NA	NA	NA	NA	NA	-0.438585	NA	NA	NA	NA	NA	NA	NA	NA	NA	NA	NA	NA	NA	1	0	1	3
chr14:91279306-91281456	CCDC88C	NA	NA	NA	NA	NA	NA	NA	NA	NA	NA	NA	NA	NA	-0.0222501	NA	NA	NA	NA	NA	NA	NA	NA	NA	NA	NA	NA	NA	NA	NA	NA	NA	NA	NA	1	0	1	1
chrX:1381104-1382390	IL3RA	NA	NA	NA	NA	NA	NA	NA	NA	NA	NA	NA	NA	NA	-0.00118935	NA	NA	NA	NA	NA	NA	NA	NA	NA	NA	NA	NA	NA	NA	NA	NA	NA	NA	NA	1	0	1	1
chr17:8835456-8836546	PIK3R6	NA	NA	NA	NA	NA	NA	NA	NA	NA	NA	NA	NA	NA	-0.00184998	NA	NA	NA	NA	NA	NA	NA	NA	NA	NA	NA	NA	NA	NA	NA	NA	NA	NA	NA	1	0	1	1
chr22:50255694-50255809	MAPK12	NA	NA	NA	NA	NA	NA	NA	-0.0382053	0.0461377	NA	NA	NA	NA	0.466829	NA	NA	NA	NA	NA	NA	NA	NA	NA	NA	NA	NA	NA	0.435484	NA	NA	NA	NA	NA	1	1	2	4
chr1:205623891-205631631	ELK4	NA	NA	NA	NA	NA	NA	NA	0.0298419	NA	NA	NA	NA	NA	-0.0112525	NA	NA	NA	NA	NA	NA	NA	NA	NA	NA	NA	NA	NA	NA	NA	NA	NA	NA	NA	1	1	2	2
chr18:54205157-54224017	MBD2	NA	NA	NA	NA	NA	NA	NA	NA	NA	NA	NA	NA	NA	-0.0184706	NA	NA	NA	NA	NA	NA	NA	NA	NA	NA	NA	NA	NA	NA	NA	NA	NA	NA	NA	1	0	1	1
chr12:49652212-49653225	FMNL3	NA	NA	NA	NA	NA	NA	NA	NA	NA	NA	NA	NA	NA	-0.0454905	-0.267857	NA	NA	NA	NA	NA	NA	NA	NA	NA	NA	NA	NA	NA	NA	NA	NA	NA	NA	1	0	1	2
chr4:67623222-67624125	UBA6	NA	NA	NA	NA	NA	NA	NA	NA	NA	NA	NA	NA	NA	-0.0443609	NA	NA	NA	NA	NA	NA	NA	NA	NA	NA	NA	NA	NA	NA	NA	NA	NA	NA	NA	1	0	1	1
chr20:63661943-63662545	RTEL1	NA	NA	NA	NA	NA	NA	NA	NA	NA	NA	NA	NA	NA	-0.0225371	NA	NA	NA	NA	NA	NA	NA	NA	NA	NA	NA	NA	NA	NA	NA	NA	NA	NA	NA	1	0	1	1
chr16:30967588-30969304	SETD1A	NA	NA	NA	NA	NA	NA	NA	NA	NA	NA	NA	NA	NA	-0.00516569	NA	NA	NA	NA	NA	NA	NA	NA	NA	NA	NA	NA	NA	NA	NA	NA	NA	NA	NA	1	0	1	1
chr1:213262816-213272523	RPS6KC1	NA	NA	NA	NA	NA	NA	NA	NA	NA	NA	NA	NA	NA	-0.0220653	NA	NA	NA	NA	NA	NA	NA	NA	NA	NA	NA	NA	NA	NA	NA	NA	NA	NA	NA	1	0	1	1
chr1:88828623-88832743	PKN2	NA	-0.146814	0.180634	-0.470633	-0.562588	NA	NA	0.280004	-0.0859816	NA	-0.15933	0.0177515	-0.322775	-0.0633255	0.367974	NA	-0.0355629	-0.204001	NA	0.520038	-0.645813	NA	0.00562441	NA	NA	-0.148998	0.528514	-0.33425	0.340688	NA	NA	NA	NA	1	2	3	20
chr12:113164285-113165643	DDX54	NA	NA	NA	NA	NA	NA	NA	NA	NA	NA	NA	NA	NA	-0.0341888	NA	NA	NA	NA	NA	NA	NA	NA	NA	NA	NA	NA	NA	NA	NA	NA	NA	NA	NA	1	0	1	1
chr12:120659908-120660195	CABP1	NA	NA	NA	NA	NA	NA	NA	NA	NA	NA	NA	0.0367004	NA	NA	0.128674	NA	NA	NA	NA	NA	NA	NA	NA	NA	NA	NA	NA	NA	NA	NA	NA	NA	NA	0	1	1	2
chr3:140959540-140963126	SLC25A36	NA	NA	NA	NA	NA	NA	NA	0.335524	NA	NA	NA	NA	NA	-0.0449024	NA	NA	NA	NA	NA	NA	NA	NA	NA	NA	NA	NA	NA	NA	NA	NA	NA	NA	NA	1	0	1	2
chr19:617849-618487	POLRMT	0.613194	-0.0300054	-0.218058	0.929249	-0.349607	0.00666998	0.277462	NA	0.485235	NA	0.64401	0.102707	-0.322807	-0.20551	-0.626179	-0.358996	-0.56505	-0.428239	-0.341028	NA	0.239343	0.694225	0.0483562	-0.463349	0.922446	0.233646	NA	-0.22871	0.871901	0.334072	NA	-0.301197	-0.282805	1	2	3	28
chr17:28883231-28884224	FLOT2	NA	NA	NA	NA	NA	NA	NA	NA	NA	NA	NA	NA	-0.538261	-0.00029872	NA	NA	NA	NA	NA	NA	NA	NA	NA	NA	NA	NA	NA	NA	NA	NA	NA	NA	NA	1	0	1	2
chr2:37056615-37057316	HEATR5B	NA	NA	NA	NA	NA	NA	NA	NA	NA	NA	NA	NA	NA	-0.0127526	NA	NA	NA	NA	NA	NA	NA	NA	NA	NA	NA	NA	NA	NA	NA	NA	NA	NA	NA	1	0	1	1
chr5:148433737-148438331	FBXO38	NA	NA	NA	NA	NA	NA	NA	NA	NA	NA	NA	NA	NA	-0.00349733	NA	NA	NA	NA	NA	NA	NA	NA	NA	NA	NA	NA	NA	NA	NA	NA	NA	NA	NA	1	0	1	1
chr4:57005719-57006815	POLR2B	NA	NA	NA	NA	NA	NA	NA	NA	NA	NA	NA	NA	NA	-0.00306703	NA	NA	NA	NA	NA	NA	NA	NA	NA	NA	NA	NA	NA	NA	NA	NA	NA	NA	NA	1	0	1	1
chr10:97390539-97390738	RRP12	NA	NA	NA	NA	NA	NA	NA	NA	NA	NA	NA	NA	NA	-0.00577201	NA	NA	NA	NA	NA	NA	NA	NA	NA	NA	NA	NA	NA	NA	NA	NA	NA	NA	NA	1	0	1	1
chr3:38010053-38010130	PLCD1	NA	-0.223874	0.127129	0.0859264	NA	NA	0.720162	-0.467633	-0.702753	-0.31948	NA	0.203582	0.084332	0.464062	0.75251	NA	-0.220519	-0.105129	0.09606	-0.597364	-0.120616	NA	0.0101853	NA	0.0970898	0.247107	0.0321341	0.960648	0.8452	0.651544	NA	-0.310215	-0.609085	0	2	2	25
chr21:44861271-44865394	PTTG1IP	NA	NA	NA	NA	NA	NA	NA	NA	NA	NA	NA	NA	NA	-0.0361056	NA	NA	NA	NA	NA	NA	NA	NA	NA	NA	NA	NA	NA	NA	NA	NA	NA	NA	NA	1	0	1	1
chr9:130076462-130077298	GPR107	NA	NA	NA	NA	NA	NA	NA	NA	NA	NA	NA	NA	NA	-0.0237569	NA	NA	NA	NA	NA	NA	NA	NA	NA	NA	NA	NA	NA	NA	NA	NA	NA	NA	NA	1	0	1	1
chr3:52478282-52478448	NISCH	NA	NA	NA	NA	NA	NA	NA	NA	NA	NA	NA	NA	NA	-0.0112996	NA	NA	NA	NA	NA	NA	NA	NA	NA	NA	NA	NA	NA	NA	NA	NA	NA	NA	NA	1	0	1	1
chr1:36343979-36344119	STK40	NA	NA	NA	NA	NA	NA	NA	NA	NA	NA	NA	NA	NA	-0.00171928	NA	NA	NA	NA	NA	NA	NA	NA	NA	NA	NA	NA	NA	NA	NA	NA	NA	NA	NA	1	0	1	1
chr12:68713808-68715626	NUP107	NA	-0.538343	0.168918	0.29786	-0.40117	0.29609	-0.237067	-0.359486	-0.378329	NA	NA	0.0194171	NA	-0.0157526	0.0563442	NA	-0.201162	0.481574	-0.771934	-0.751585	NA	NA	NA	0.163833	-0.148962	-0.494974	0.428677	-0.0561007	NA	NA	NA	0.990991	-0.709776	1	1	2	22
chr8:55969793-55998345	LYN	NA	NA	NA	NA	NA	NA	NA	NA	NA	NA	NA	NA	NA	-0.00757154	NA	NA	NA	NA	NA	NA	NA	NA	NA	NA	NA	NA	NA	NA	NA	NA	NA	NA	NA	1	0	1	1
chr7:73304408-73304746	NSUN5	NA	0.24122	NA	0.297239	-0.588392	NA	NA	NA	0.517603	NA	NA	0.272302	-0.693274	-0.0023199	NA	NA	-0.216851	0.18427	NA	NA	-0.0189105	NA	NA	NA	0.29693	NA	NA	-0.0245485	NA	NA	NA	-0.183892	NA	3	0	3	13
chr12:95988240-95990392	HAL	NA	NA	NA	NA	NA	NA	NA	NA	NA	NA	NA	NA	NA	-0.00339011	NA	NA	NA	NA	NA	NA	NA	NA	NA	NA	NA	NA	NA	NA	NA	NA	NA	NA	NA	1	0	1	1
chr19:38119882-38130497	SIPA1L3	NA	NA	NA	NA	NA	NA	NA	NA	NA	NA	NA	NA	NA	-0.0247591	NA	NA	NA	NA	NA	NA	NA	NA	NA	NA	NA	NA	NA	NA	NA	NA	NA	NA	NA	1	0	1	1
chr16:24929660-24930783	ARHGAP17	NA	NA	NA	NA	NA	NA	NA	NA	NA	NA	NA	NA	NA	-0.0365418	NA	NA	NA	NA	NA	NA	NA	NA	NA	NA	NA	NA	NA	NA	NA	NA	NA	NA	NA	1	0	1	1
chr17:49809208-49811475	KAT7	NA	NA	NA	NA	NA	NA	NA	NA	NA	NA	NA	NA	NA	-0.0418849	NA	NA	NA	NA	NA	NA	NA	NA	NA	NA	NA	NA	NA	NA	NA	NA	NA	NA	NA	1	0	1	1
chr16:2461224-2461746	TEDC2	NA	NA	NA	0.017689	NA	NA	NA	-0.206194	NA	NA	NA	NA	NA	NA	NA	NA	NA	NA	NA	NA	NA	NA	NA	NA	NA	NA	NA	-0.370058	NA	NA	NA	0.466424	NA	0	1	1	4
chr13:113228045-113229445	CUL4A	NA	NA	NA	NA	NA	NA	NA	NA	NA	NA	NA	NA	NA	-0.0388909	NA	NA	NA	NA	NA	-0.231199	NA	NA	NA	NA	NA	NA	NA	NA	NA	NA	NA	NA	NA	1	0	1	2
chr17:7934222-7934464	CNTROB	NA	NA	NA	NA	NA	NA	NA	NA	NA	NA	NA	NA	NA	-0.0158809	NA	NA	NA	NA	NA	NA	NA	NA	NA	NA	NA	NA	NA	NA	NA	NA	NA	NA	NA	1	0	1	1
chr7:45102491-45103332	TBRG4	NA	-0.00303925	NA	0.647224	0.386301	NA	NA	0.19533	-0.704299	NA	NA	0.00227658	0.420929	-0.285669	-0.540005	NA	0.0521302	-0.633206	0.324596	0.06621	-0.199216	0.998536	0.00404791	0.0715897	NA	NA	-0.635848	NA	0.633134	-0.313244	-0.28431	NA	NA	1	2	3	21
chr3:46999474-46999629	NBEAL2	NA	NA	NA	NA	NA	NA	NA	NA	NA	NA	NA	NA	NA	-8.375e-05	NA	NA	NA	NA	NA	NA	NA	NA	NA	NA	NA	NA	NA	NA	NA	NA	NA	NA	NA	1	0	1	1
chr17:81682149-81682490	ARL16	NA	-0.00505786	0.0741576	-0.522015	-0.410043	-0.609281	0.0741615	-0.41529	0.82715	-0.394033	0.415778	0.00016568	-0.686491	-0.254056	0.0483374	-0.0291834	0.409507	-0.241775	-0.116399	0.139434	-0.242577	0.301135	0.0100525	0.630706	-0.255503	-0.331429	-0.865601	-0.077508	0.197422	0.497831	NA	0.155689	NA	2	3	5	30
chr11:66845562-66845859	RCE1	NA	-0.230311	NA	NA	0.367197	NA	-0.170643	-0.246597	-0.217189	NA	NA	0.0473831	-0.0851201	-0.657975	0.691308	NA	-0.00685556	-0.0750045	NA	NA	-0.0664229	0.930369	0.082024	NA	-0.0816666	0.0546708	NA	-0.0711089	0.118001	0.0571212	NA	-0.0575324	NA	1	1	2	20
chr16:2001191-2001582	ZNF598	NA	NA	NA	-0.0921714	NA	NA	NA	NA	NA	NA	0.652613	0.693849	NA	-0.00875336	0.403769	NA	-0.103417	0.319748	NA	NA	NA	NA	NA	NA	NA	NA	NA	0.863334	NA	NA	NA	NA	NA	1	0	1	8
chr3:179377448-179378340	MFN1	NA	NA	NA	NA	NA	NA	NA	NA	NA	NA	NA	NA	NA	NA	NA	NA	NA	NA	NA	-0.0137047	NA	NA	NA	NA	NA	NA	NA	NA	NA	NA	NA	NA	NA	1	0	1	1
chr8:43173743-43178073	HGSNAT	NA	NA	-0.879008	NA	NA	NA	NA	0.112659	NA	NA	-0.998988	0.00143126	NA	-0.0557357	NA	NA	NA	NA	NA	-0.540001	NA	NA	NA	NA	NA	NA	0.623284	NA	0.377654	NA	NA	NA	NA	0	1	1	8
chr17:7393836-7394103	PLSCR3	NA	-0.439808	NA	-0.37222	-0.0328094	NA	0.244642	-0.571185	-0.364833	NA	NA	0.335459	NA	-0.43186	-0.23063	NA	NA	-0.255679	NA	NA	0.639778	NA	NA	NA	NA	0.755164	-0.590219	NA	NA	NA	NA	NA	NA	1	0	1	13
chr1:215611921-215618885	KCTD3	NA	NA	NA	NA	NA	NA	NA	NA	NA	NA	NA	NA	NA	-0.0102185	NA	NA	NA	NA	NA	NA	NA	NA	NA	NA	NA	NA	NA	NA	NA	NA	NA	NA	NA	1	0	1	1
chr22:50444117-50444198	PPP6R2	NA	NA	NA	NA	NA	NA	NA	NA	NA	NA	NA	-0.484946	NA	-0.59874	NA	NA	NA	0.490106	NA	-0.0451095	NA	NA	NA	NA	NA	NA	NA	NA	NA	NA	NA	-0.526645	NA	1	0	1	5
chr10:102377140-102379283	GBF1	NA	NA	NA	NA	NA	NA	NA	NA	NA	NA	NA	NA	NA	-0.00402945	NA	NA	NA	NA	NA	NA	NA	NA	NA	NA	NA	NA	NA	NA	NA	NA	NA	NA	NA	1	0	1	1
chr3:9442245-9443307	SETD5	NA	NA	NA	NA	NA	NA	NA	0.24472	NA	NA	NA	NA	NA	-0.0039692	NA	NA	NA	NA	NA	NA	NA	NA	NA	NA	NA	NA	-0.383365	NA	NA	NA	NA	NA	NA	1	0	1	3
chr22:42797605-42799038	ARFGAP3	NA	NA	NA	NA	-0.242735	NA	NA	NA	NA	NA	NA	0.00512589	NA	-0.0214914	-0.608549	NA	-0.00893236	NA	NA	NA	-0.797402	NA	NA	NA	NA	NA	NA	NA	NA	NA	NA	NA	NA	2	1	3	6
chr5:14712973-14713543	ANKH	-0.019058	-0.0310505	-0.0059561	-0.865295	-0.377628	NA	0.797445	-0.411498	-0.0676727	-0.120744	0.720592	0.0213065	0.0816171	0.309794	NA	0.254307	-0.017229	0.632705	NA	-0.118472	NA	NA	NA	NA	-0.275939	-0.31653	-0.0224152	0.906722	NA	-0.548745	NA	-0.117138	0.842442	5	1	6	24
chr11:60178316-60179830	MS4A6A	NA	NA	NA	NA	NA	NA	NA	-0.0408608	NA	NA	NA	-0.0937665	-0.525385	-0.0421469	0.312435	NA	NA	NA	NA	NA	NA	NA	NA	NA	NA	NA	NA	NA	NA	NA	NA	NA	NA	2	0	2	5
chr17:75235201-75235577	NUP85	NA	NA	NA	NA	0.33911	NA	NA	NA	NA	NA	NA	0.0170638	NA	-0.00178997	NA	NA	NA	NA	NA	0.76593	NA	NA	NA	NA	NA	NA	0.403318	NA	NA	NA	NA	NA	NA	1	1	2	5
chr14:73266628-73266722	PAPLN	NA	NA	NA	NA	NA	NA	NA	0.0520752	NA	NA	NA	0.249356	0.155395	NA	-0.070322	NA	NA	NA	NA	NA	NA	NA	NA	NA	NA	NA	-0.178261	NA	0.0269647	-0.397174	NA	NA	NA	0	1	1	7
chrX:53396380-53396471	SMC1A	NA	NA	NA	NA	NA	NA	NA	NA	NA	NA	NA	NA	NA	-0.0376245	NA	NA	NA	NA	NA	NA	NA	NA	NA	NA	NA	NA	NA	NA	NA	NA	NA	NA	NA	1	0	1	1
chr1:39852876-39853969	TRIT1	NA	NA	NA	NA	NA	NA	NA	0.678871	NA	NA	NA	NA	NA	-0.0189955	NA	NA	NA	NA	NA	NA	NA	NA	NA	NA	NA	NA	0.192237	NA	NA	NA	NA	NA	NA	1	0	1	3
chr2:130372483-130372872	PTPN18	NA	NA	NA	NA	NA	NA	-0.207772	-0.775136	-0.244685	NA	NA	-0.370248	-0.0888684	-0.0396491	NA	NA	NA	NA	NA	-0.114919	0.187378	NA	NA	NA	NA	NA	0.0171624	NA	NA	NA	NA	NA	NA	1	1	2	9
chr19:49654431-49654651	SCAF1	NA	NA	NA	NA	NA	NA	NA	NA	NA	NA	NA	NA	NA	-0.0284924	NA	NA	NA	NA	NA	NA	NA	NA	NA	NA	NA	NA	NA	NA	NA	NA	NA	NA	NA	1	0	1	1
chr17:49805445-49811475	KAT7	NA	NA	NA	NA	NA	NA	NA	NA	NA	NA	NA	NA	NA	-0.0120209	NA	NA	NA	NA	NA	NA	NA	NA	NA	NA	NA	NA	NA	NA	NA	NA	NA	NA	NA	1	0	1	1
chr12:118028030-118029770	RFC5	-0.0302045	-0.0575602	-0.320566	NA	-0.15117	NA	NA	0.350398	0.441802	NA	-0.491592	0.0394665	-0.0556011	-0.130085	-0.417066	NA	NA	-0.00273557	NA	NA	NA	NA	NA	NA	-0.258731	-0.81784	0.339354	-0.151612	-0.347745	NA	NA	NA	NA	2	1	3	17
chr1:86719635-86722539	SH3GLB1	NA	NA	NA	NA	NA	NA	NA	NA	NA	NA	NA	NA	NA	-0.0134443	NA	NA	NA	NA	NA	NA	NA	NA	NA	NA	NA	NA	NA	NA	NA	NA	NA	NA	NA	1	0	1	1
chr8:120548958-120575085	SNTB1	NA	NA	NA	NA	NA	NA	NA	NA	NA	NA	NA	NA	NA	-0.00988366	NA	NA	NA	NA	NA	NA	NA	NA	NA	NA	NA	NA	NA	NA	NA	NA	NA	NA	NA	1	0	1	1
chr16:30365594-30369227	TBC1D10B	NA	NA	-0.113114	NA	0.439726	NA	NA	0.158242	NA	NA	NA	0.205868	-0.177436	-0.00803547	NA	NA	-0.157128	NA	NA	NA	0.239409	NA	NA	NA	NA	0.708686	-0.703219	NA	-0.502322	NA	NA	NA	NA	1	0	1	11
chr11:47424183-47424428	PSMC3	NA	NA	NA	NA	NA	NA	NA	NA	NA	NA	NA	NA	NA	-0.0431842	NA	NA	NA	NA	NA	NA	NA	NA	NA	NA	NA	NA	NA	NA	NA	NA	NA	NA	NA	1	0	1	1
chrX:48974285-48975154	GRIPAP1	NA	NA	NA	NA	NA	NA	NA	NA	NA	NA	NA	NA	NA	-0.00623296	NA	NA	NA	NA	NA	NA	NA	NA	NA	NA	NA	NA	NA	NA	NA	NA	NA	NA	NA	1	0	1	1
chr11:119114365-119116044	C2CD2L	NA	NA	NA	NA	NA	NA	NA	-0.581086	NA	NA	NA	NA	NA	-0.0100954	NA	NA	NA	NA	NA	-0.281687	NA	NA	NA	NA	NA	NA	0.292599	NA	NA	NA	NA	NA	NA	1	0	1	4
chr1:150829980-150831817	ARNT	NA	NA	NA	NA	NA	NA	NA	NA	NA	NA	NA	NA	NA	-0.00125705	NA	NA	NA	NA	NA	NA	NA	NA	NA	NA	NA	NA	NA	NA	NA	NA	NA	NA	NA	1	0	1	1
chr3:185919496-185921103	TRA2B	NA	NA	NA	NA	NA	NA	NA	NA	NA	NA	NA	NA	NA	-0.00111801	NA	NA	NA	NA	NA	NA	NA	NA	NA	NA	NA	NA	NA	NA	NA	NA	NA	NA	NA	1	0	1	1
chr11:3824135-3824269	PGAP2	-0.231309	-0.0398952	-0.307321	0.449395	0.297894	0.0575849	-0.733305	0.649175	0.461791	-0.456759	NA	0.00051879	-0.140304	-0.909841	-0.107379	0.626913	-0.291759	0.531038	-0.327604	0.425454	-0.194945	-0.590999	0.0224074	0.64922	0.362726	0.398796	0.204757	-0.623488	0.673903	0.247814	-0.548513	-0.0823746	-0.628595	1	2	3	32
chr20:36794599-36796881	SOGA1	NA	NA	NA	NA	NA	NA	NA	-0.698093	NA	NA	NA	NA	NA	-0.541141	NA	NA	NA	NA	NA	-0.0223131	NA	NA	NA	NA	NA	NA	NA	NA	NA	NA	NA	NA	NA	1	0	1	3
chr9:33116113-33120418	B4GALT1	NA	NA	NA	NA	NA	NA	NA	NA	NA	NA	NA	NA	NA	-0.0123594	NA	NA	NA	NA	NA	NA	NA	NA	NA	NA	NA	NA	NA	NA	NA	NA	NA	NA	NA	1	0	1	1
chr10:69227369-69232763	HKDC1	NA	NA	NA	NA	NA	NA	NA	NA	NA	NA	NA	NA	NA	NA	NA	NA	NA	NA	NA	NA	NA	NA	NA	NA	NA	NA	0.0373094	NA	NA	NA	NA	NA	NA	0	1	1	1
chr1:43899263-43899540	ST3GAL3	NA	NA	NA	NA	NA	NA	NA	NA	NA	NA	NA	NA	NA	-0.00651683	NA	NA	NA	NA	NA	NA	NA	NA	NA	NA	NA	NA	NA	NA	NA	NA	NA	NA	NA	1	0	1	1
chr19:55093076-55093152	PPP1R12C	0.141255	-0.217988	0.213552	-0.0436731	-0.479669	0.220491	0.335988	0.29698	0.189247	-0.112517	-0.546803	0.00015724	0.716331	0.370644	0.00263562	0.987525	0.492098	-0.347452	-0.108534	0.777534	0.453387	-0.118353	0.146684	-0.371195	0.607035	0.197825	-0.163305	0.596811	0.234259	-0.0601581	-0.00965794	0.06785	NA	2	2	4	32
chr15:80153135-80158059	FAH	NA	NA	NA	NA	NA	NA	NA	NA	NA	NA	NA	NA	NA	-0.00139611	NA	NA	NA	NA	NA	NA	NA	NA	NA	NA	NA	NA	NA	NA	NA	NA	NA	NA	NA	1	0	1	1
chr1:246566663-246591511	CNST	NA	NA	NA	NA	NA	NA	NA	NA	NA	NA	NA	NA	NA	-0.0389084	NA	NA	NA	NA	NA	NA	NA	NA	NA	NA	NA	NA	NA	NA	NA	NA	NA	NA	NA	1	0	1	1
chr22:50431382-50432264	PPP6R2	NA	NA	NA	NA	NA	NA	NA	NA	NA	NA	NA	NA	NA	-0.0106513	NA	NA	NA	NA	NA	NA	NA	NA	NA	NA	NA	NA	NA	NA	NA	NA	NA	NA	NA	1	0	1	1
chr2:239082221-239084154	HDAC4	NA	NA	NA	NA	NA	NA	NA	NA	NA	NA	NA	NA	NA	-0.00921746	NA	NA	NA	NA	NA	NA	NA	NA	NA	NA	NA	NA	NA	NA	NA	NA	NA	NA	NA	1	0	1	1
chr2:128000146-128000306	SAP130	NA	NA	NA	NA	NA	NA	NA	NA	NA	NA	NA	NA	NA	-0.00178798	NA	NA	NA	NA	NA	NA	NA	NA	NA	NA	NA	NA	NA	NA	NA	NA	NA	NA	NA	1	0	1	1
chr19:35896269-35896391	NFKBID	NA	NA	NA	-0.0282648	NA	NA	-0.117625	0.205918	NA	NA	NA	NA	NA	-0.906065	NA	NA	NA	0.146355	NA	0.270641	NA	NA	NA	NA	NA	NA	-0.0872516	NA	-0.104987	-0.0264312	NA	NA	NA	2	0	2	9
chr8:144497453-144498769	PPP1R16A	-0.667585	-0.275662	-0.0302752	0.0529336	0.293596	0.0101651	0.149971	-0.446422	-0.865778	NA	-0.650749	0.147978	0.776714	-0.271255	-0.882437	0.188853	-0.141058	0.0446477	0.49845	0.158475	-0.246151	0.172622	0.0652619	0.24596	-0.342104	0.524105	-0.206964	0.355473	0.793162	-0.513718	0.57442	-0.261947	-0.426741	1	2	3	32
chr5:96765325-96766052	CAST	NA	NA	NA	NA	NA	NA	NA	NA	NA	NA	NA	NA	NA	-0.00773125	NA	NA	NA	NA	NA	NA	NA	NA	NA	NA	NA	NA	NA	NA	NA	NA	NA	NA	NA	1	0	1	1
chr6:31760216-31760689	MSH5	NA	NA	NA	NA	NA	NA	-0.490107	0.66118	-0.492338	NA	NA	0.146107	NA	-0.983243	-0.00917972	NA	NA	0.452393	NA	-0.259001	NA	NA	NA	NA	NA	NA	0.105329	NA	NA	NA	NA	NA	NA	1	0	1	9
chr1:111477775-111477982	C1orf162	NA	-0.257429	-0.707715	-0.127043	0.0949852	NA	NA	-0.466061	-0.657492	NA	NA	0.00264481	-0.415257	-0.268227	-0.0034472	NA	0.270888	-0.775824	-0.308047	0.52114	-0.0575935	0.954587	NA	NA	0.426395	-0.737356	-0.0104884	-0.298991	-0.652867	-0.399616	NA	-0.197536	NA	2	1	3	23
chrX:41342836-41343215	DDX3X	NA	NA	NA	NA	NA	NA	NA	NA	NA	NA	NA	NA	NA	-0.00419877	NA	NA	NA	NA	NA	NA	NA	NA	NA	NA	NA	NA	NA	NA	NA	NA	NA	NA	NA	1	0	1	1
chr19:50882684-50887718	KLKP1	NA	NA	NA	NA	NA	NA	NA	NA	NA	NA	NA	NA	NA	NA	NA	NA	NA	NA	NA	NA	NA	NA	0.0455381	NA	NA	NA	NA	NA	NA	NA	NA	NA	NA	0	1	1	1
chr2:8776892-8778638	KIDINS220	NA	NA	NA	NA	NA	NA	NA	NA	NA	NA	NA	NA	NA	-0.00462212	NA	NA	NA	NA	NA	NA	NA	NA	NA	NA	NA	NA	NA	NA	NA	NA	NA	NA	NA	1	0	1	1
chr20:64265429-64267967	PCMTD2	NA	NA	NA	NA	NA	NA	NA	NA	NA	NA	NA	NA	NA	-0.0227286	NA	NA	NA	NA	NA	NA	NA	NA	NA	NA	NA	NA	NA	NA	NA	NA	NA	NA	NA	1	0	1	1
chr6:7393303-7395052	RIOK1	NA	NA	NA	NA	NA	NA	NA	NA	NA	NA	NA	NA	NA	-0.0197536	NA	NA	NA	NA	NA	NA	NA	NA	NA	NA	NA	NA	NA	NA	NA	NA	NA	NA	NA	1	0	1	1
chr22:21693872-21694592	PPIL2	-0.580472	-0.0721937	-0.221558	0.917398	0.0165948	0.0131608	-0.352591	0.646279	0.788407	-0.228604	0.195907	0.0120861	-0.674678	-0.00677179	0.088497	-0.206164	0.148241	-0.126881	NA	0.309253	-0.626476	0.581587	0.00432266	0.252858	0.499678	-0.481242	0.61815	-0.76261	0.604959	0.212128	NA	0.638262	NA	1	4	5	30
chrX:130072417-130074048	ELF4	NA	NA	NA	NA	NA	NA	NA	NA	NA	NA	NA	NA	NA	-0.00929344	NA	NA	NA	NA	NA	NA	NA	NA	NA	NA	NA	NA	NA	NA	NA	NA	NA	NA	NA	1	0	1	1
chr16:3749683-3751725	CREBBP	NA	NA	NA	NA	NA	NA	NA	NA	NA	NA	NA	NA	NA	-0.00019282	NA	NA	NA	NA	NA	NA	NA	NA	NA	NA	NA	NA	NA	NA	NA	NA	NA	NA	NA	1	0	1	1
chr10:133369022-133369903	ECHS1	NA	NA	NA	NA	NA	NA	NA	NA	NA	NA	NA	NA	NA	-0.0439994	NA	NA	NA	NA	NA	NA	NA	NA	NA	NA	NA	NA	NA	NA	NA	NA	NA	NA	NA	1	0	1	1
chr1:183574621-183577598	NCF2	NA	NA	NA	NA	NA	NA	NA	NA	NA	NA	NA	NA	NA	-0.00313207	NA	NA	NA	NA	NA	NA	NA	NA	NA	NA	NA	NA	NA	NA	NA	NA	NA	NA	NA	1	0	1	1
chrX:135292473-135293729	ZNF75D	-0.120191	NA	NA	NA	NA	NA	NA	0.608781	NA	NA	NA	0.00010075	NA	NA	NA	NA	NA	NA	NA	NA	NA	NA	NA	NA	NA	NA	-0.829434	NA	0.411373	NA	NA	NA	NA	0	1	1	5
chr12:112040578-112042038	NAA25	NA	NA	NA	NA	NA	NA	NA	NA	NA	NA	NA	NA	NA	-0.0286167	NA	NA	NA	NA	NA	NA	NA	NA	NA	NA	NA	NA	NA	NA	NA	NA	NA	NA	NA	1	0	1	1
chr3:129257860-129260332	COPG1	NA	NA	NA	NA	NA	NA	NA	NA	NA	NA	NA	NA	NA	-0.0250144	NA	NA	NA	NA	NA	NA	NA	NA	NA	NA	NA	NA	NA	NA	NA	NA	NA	NA	NA	1	0	1	1
chr12:123166789-123176687	MPHOSPH9	NA	NA	NA	NA	NA	NA	NA	NA	NA	NA	NA	NA	NA	-0.0430765	NA	NA	NA	NA	NA	NA	NA	NA	NA	NA	NA	NA	NA	NA	NA	NA	NA	NA	NA	1	0	1	1
chr20:3218632-3221840	ITPA	NA	-0.0101199	-0.00536951	NA	0.595147	NA	NA	0.740754	-0.372872	NA	NA	0.0405434	0.138615	-0.0276831	0.591324	NA	-0.137595	-0.542137	NA	-0.893856	NA	NA	NA	NA	NA	NA	0.788076	NA	NA	NA	NA	NA	-0.0495035	4	1	5	14
chr17:78126648-78126776	TMC6	NA	NA	NA	NA	NA	NA	NA	NA	NA	NA	NA	NA	NA	-0.00230263	NA	NA	NA	NA	NA	NA	NA	NA	NA	NA	NA	NA	NA	NA	NA	NA	NA	NA	NA	1	0	1	1
chr22:50406875-50414551	PPP6R2	NA	NA	NA	NA	NA	NA	NA	NA	NA	NA	NA	NA	NA	-0.00577053	NA	NA	NA	NA	NA	NA	NA	NA	NA	NA	NA	NA	0.233484	NA	NA	NA	NA	NA	NA	1	0	1	2
chr1:116514822-116519230	CD58	NA	-0.544432	-0.153947	-0.66359	-0.110077	0.0222912	0.312042	-0.504978	-0.0144104	-0.092672	NA	0.00312891	-0.359527	-0.127445	NA	NA	-0.062223	-0.575802	-0.117298	0.0877661	-0.0488747	0.288008	0.125629	-0.392138	0.0261212	0.454437	-0.275814	-0.429054	0.102634	-0.107554	NA	NA	NA	2	3	5	26
chr2:241483533-241484241	FARP2	NA	NA	NA	NA	NA	NA	NA	0.0558708	NA	NA	NA	NA	NA	NA	NA	NA	NA	NA	NA	-0.0188188	NA	NA	NA	NA	NA	NA	NA	NA	NA	NA	NA	NA	NA	1	0	1	2
chr6:43454474-43454749	DLK2	NA	NA	NA	NA	NA	NA	NA	0.0307456	NA	NA	NA	NA	NA	NA	NA	NA	NA	NA	NA	NA	NA	NA	NA	NA	NA	NA	NA	NA	NA	NA	NA	NA	NA	0	1	1	1
chr8:143717792-143718046	MAPK15	NA	NA	0.597598	NA	-0.631791	NA	NA	NA	NA	NA	NA	0.521772	0.364959	NA	NA	NA	NA	NA	0.0652868	0.355897	NA	NA	NA	NA	NA	NA	NA	NA	-0.567338	NA	0.0173494	0.364857	NA	0	1	1	9
chr21:44074470-44075038	TRAPPC10	NA	NA	NA	NA	NA	NA	NA	NA	NA	NA	NA	NA	NA	-0.00506117	NA	NA	NA	NA	NA	NA	NA	NA	NA	NA	NA	NA	NA	NA	NA	NA	NA	NA	NA	1	0	1	1
chr14:50912036-50912155	PYGL	NA	NA	NA	NA	NA	NA	NA	NA	NA	NA	NA	NA	NA	-0.00209366	NA	NA	NA	NA	NA	NA	NA	NA	NA	NA	NA	NA	NA	NA	NA	NA	NA	NA	NA	1	0	1	1
chr3:172112590-172133470	FNDC3B	NA	NA	NA	NA	NA	NA	NA	NA	NA	NA	NA	NA	NA	-0.0294236	NA	NA	NA	NA	NA	NA	NA	NA	NA	NA	NA	NA	NA	NA	NA	NA	NA	NA	NA	1	0	1	1
chr21:33432802-33439213	TMEM50B	NA	0.0478876	-0.603581	-0.312732	-0.174273	NA	0.325157	-0.175873	0.0500182	NA	NA	-0.566246	NA	0.276092	NA	NA	0.00805478	-0.239862	NA	-0.0952759	0.123026	NA	-0.0163448	NA	NA	NA	0.305842	NA	0.338564	NA	NA	NA	NA	1	2	3	16
chr12:120223833-120224150	PXN	NA	NA	NA	NA	NA	NA	NA	NA	NA	NA	NA	NA	NA	-0.002267	NA	NA	NA	NA	NA	NA	NA	NA	NA	NA	NA	NA	NA	NA	NA	NA	NA	NA	NA	1	0	1	1
chr12:57102921-57104463	STAT6	0.432887	-0.00365798	0.0316371	0.883847	0.742166	0.152827	-0.26438	0.490387	0.38643	0.838486	-0.217092	6.67e-05	0.383187	-0.00699956	NA	0.221121	0.154669	-0.175735	-0.331432	-0.576905	-0.0925245	0.421681	0.00969777	-0.71603	0.178839	0.926284	-0.820838	-0.371542	0.220322	0.359282	-0.732258	-0.562286	-0.613423	2	3	5	32
chr1:77568466-77576067	ZZZ3	NA	NA	NA	NA	NA	NA	NA	NA	NA	NA	NA	NA	NA	-0.00266337	NA	NA	NA	NA	NA	NA	NA	NA	NA	NA	NA	NA	NA	NA	NA	NA	NA	NA	NA	1	0	1	1
chr12:49055026-49055275	KMT2D	NA	NA	NA	NA	NA	NA	NA	NA	NA	NA	NA	NA	NA	-0.0190219	NA	NA	NA	NA	NA	NA	NA	NA	NA	NA	NA	NA	NA	NA	NA	NA	NA	NA	NA	1	0	1	1
chr20:44938748-44939125	PABPC1L	NA	NA	NA	NA	NA	NA	NA	-0.0219499	NA	NA	NA	NA	NA	-0.113219	NA	NA	NA	0.380472	NA	NA	NA	NA	NA	NA	NA	NA	NA	0.836913	NA	NA	NA	-0.235358	NA	1	0	1	5
chr2:19898035-19901705	TTC32	NA	-0.0140427	0.202454	0.282876	NA	NA	NA	0.221779	0.428926	NA	0.56159	0.0067059	NA	NA	0.211697	NA	NA	-0.172347	NA	0.32572	NA	NA	0.176019	NA	NA	NA	-0.663709	-0.465221	-0.370375	-0.166886	NA	-0.844027	NA	1	1	2	16
chr17:28715122-28715194	RAB34	NA	NA	NA	NA	NA	NA	NA	NA	0.443749	NA	NA	NA	NA	-0.0258659	-0.634151	NA	NA	NA	NA	NA	NA	NA	NA	NA	NA	NA	NA	NA	NA	NA	NA	NA	NA	1	0	1	3
chr15:55321390-55327530	PIGB	NA	NA	NA	NA	NA	NA	NA	NA	NA	NA	NA	NA	NA	-0.0192828	NA	NA	NA	NA	NA	NA	NA	NA	NA	NA	NA	NA	NA	NA	NA	NA	NA	NA	NA	1	0	1	1
chr17:4673456-4673618	PELP1	NA	-0.0931543	NA	0.658611	0.253122	NA	0.618491	NA	NA	NA	NA	0.470673	-0.119988	-0.0192862	NA	NA	NA	-0.133636	NA	NA	NA	NA	NA	NA	NA	NA	NA	-0.631393	NA	0.286093	NA	0.0285585	NA	1	1	2	11
chr11:8097826-8098757	TUB	NA	NA	NA	NA	NA	NA	NA	NA	NA	NA	NA	NA	NA	NA	2.539e-05	NA	NA	NA	NA	NA	NA	NA	NA	NA	NA	NA	NA	NA	NA	NA	NA	NA	NA	0	1	1	1
chr16:208664-220648	LUC7L	NA	NA	NA	NA	NA	NA	NA	0.260093	NA	NA	NA	NA	NA	-0.482741	NA	NA	NA	NA	NA	NA	NA	NA	NA	NA	NA	NA	0.0216281	NA	NA	NA	NA	NA	NA	0	1	1	3
chr19:6744994-6746451	TRIP10	-0.170145	-0.00027423	0.291811	0.407162	-0.411072	0.467068	-0.741264	-0.204974	-0.310309	-0.790512	-0.787121	0.00243028	-0.448025	NA	-0.0282049	-0.0423927	0.147296	-0.0600615	-0.139236	-0.956261	-0.082072	-0.597157	0.0163622	0.25456	-0.284477	0.365516	0.808725	-0.0120365	0.5956	0.653567	0.280323	0.640988	-0.0883185	4	2	6	32
chrX:18936150-18938626	PHKA2	NA	NA	NA	NA	NA	NA	NA	NA	NA	NA	NA	NA	NA	-0.00262939	NA	NA	NA	NA	NA	NA	NA	NA	NA	NA	NA	NA	NA	NA	NA	NA	NA	NA	NA	1	0	1	1
chr17:36586198-36586996	GGNBP2	NA	NA	NA	NA	NA	NA	NA	NA	NA	NA	NA	NA	-0.0358998	-0.0122188	NA	NA	NA	NA	NA	NA	NA	NA	NA	NA	NA	NA	NA	NA	NA	NA	NA	NA	NA	2	0	2	2
chrX:11761582-11762129	MSL3	NA	NA	NA	NA	NA	NA	NA	NA	NA	NA	NA	NA	NA	-0.0375093	NA	NA	NA	NA	NA	NA	NA	NA	NA	NA	NA	NA	NA	NA	NA	NA	NA	NA	NA	1	0	1	1
chr13:24460136-24469023	PARP4	NA	NA	NA	NA	NA	NA	NA	NA	NA	NA	NA	NA	NA	-0.00205918	NA	NA	NA	NA	NA	NA	NA	NA	NA	NA	NA	NA	NA	NA	NA	NA	NA	NA	NA	1	0	1	1
chr11:74464325-74467397	KCNE3	NA	NA	NA	NA	NA	NA	NA	NA	NA	NA	NA	0.0157564	NA	NA	NA	NA	NA	NA	NA	NA	NA	NA	NA	NA	NA	NA	-0.284127	NA	NA	NA	NA	NA	NA	0	1	1	2
chr7:100676799-100677351	GNB2	NA	NA	NA	NA	NA	NA	NA	NA	NA	NA	NA	NA	NA	-0.0115391	NA	NA	NA	NA	NA	NA	NA	NA	NA	NA	NA	NA	NA	NA	NA	NA	NA	NA	NA	1	0	1	1
chr6:149676737-149679874	LATS1	NA	NA	NA	NA	NA	NA	NA	NA	NA	NA	NA	NA	NA	-0.0117315	NA	NA	NA	NA	NA	NA	NA	NA	NA	NA	NA	NA	NA	NA	NA	NA	NA	NA	NA	1	0	1	1
chr7:151117777-151118209	AGAP3	NA	NA	NA	NA	NA	NA	NA	NA	NA	NA	NA	NA	NA	-0.0416884	NA	NA	NA	NA	NA	NA	NA	NA	NA	NA	NA	NA	NA	NA	NA	NA	NA	NA	NA	1	0	1	1
chr6:139135667-139166283	HECA	NA	NA	NA	NA	NA	NA	NA	NA	NA	NA	NA	NA	NA	-0.0186781	NA	NA	NA	NA	NA	NA	NA	NA	NA	NA	NA	NA	NA	NA	NA	NA	NA	NA	NA	1	0	1	1
chr1:46678636-46683299	EFCAB14	NA	NA	NA	NA	NA	NA	NA	NA	NA	NA	NA	NA	NA	-0.00828437	NA	NA	NA	NA	NA	NA	NA	NA	NA	NA	NA	NA	NA	NA	NA	NA	NA	NA	NA	1	0	1	1
chr14:67381690-67382446	EIF2S1	NA	NA	NA	NA	NA	NA	NA	NA	NA	NA	NA	NA	NA	-0.0258224	NA	NA	NA	NA	NA	NA	NA	NA	NA	NA	NA	NA	NA	NA	NA	NA	NA	NA	NA	1	0	1	1
chr7:44758108-44759280	ZMIZ2	NA	NA	NA	NA	NA	NA	NA	NA	0.552781	NA	NA	0.203629	NA	-0.532676	NA	NA	NA	NA	NA	0.0470676	NA	NA	NA	NA	NA	NA	NA	NA	NA	NA	NA	NA	NA	0	1	1	4
chr20:63689865-63690086	RTEL1	NA	0.16223	NA	-0.472562	NA	0.605343	NA	0.288702	0.626607	NA	NA	0.78921	-0.834286	-0.175151	0.407581	NA	0.145963	NA	NA	0.245926	0.119145	NA	NA	0.413578	NA	-0.344271	-0.12184	0.0336487	NA	0.441918	NA	NA	NA	0	1	1	17
chr2:189459424-189462483	WDR75	NA	NA	NA	NA	NA	NA	NA	NA	NA	NA	NA	NA	NA	-0.00730916	NA	NA	NA	NA	NA	NA	NA	NA	NA	NA	NA	NA	NA	NA	NA	NA	NA	NA	NA	1	0	1	1
chr12:49003290-49003557	PRKAG1	NA	NA	NA	NA	NA	NA	NA	NA	NA	NA	NA	NA	NA	-1.055e-05	NA	NA	NA	NA	NA	NA	NA	NA	NA	NA	NA	NA	NA	NA	NA	NA	NA	NA	NA	1	0	1	1
chr2:201704218-201704453	ALS2	NA	NA	NA	NA	NA	NA	NA	-0.188929	NA	NA	NA	NA	NA	-0.0237466	NA	NA	NA	NA	NA	NA	NA	NA	NA	NA	NA	NA	0.214755	NA	NA	NA	NA	NA	NA	1	0	1	3
chr16:1745103-1747028	MAPK8IP3	-0.107476	-0.448497	-0.0974927	-0.396754	0.344222	0.0103366	NA	-0.416121	0.258494	NA	-0.218752	0.272118	-0.291355	-0.105322	0.0436107	NA	-0.513872	-0.00504191	-0.0140367	0.91154	-0.135111	0.998852	0.103931	-0.245318	-0.235345	0.189784	0.142647	0.480664	0.103632	0.402672	NA	-0.0140125	NA	3	2	5	28
chr7:157187021-157201720	UBE3C	NA	NA	NA	NA	NA	NA	NA	NA	NA	NA	NA	NA	NA	-0.00219744	NA	NA	NA	NA	NA	NA	NA	NA	NA	NA	NA	NA	NA	NA	NA	NA	NA	NA	NA	1	0	1	1
chr3:48585856-48585939	COL7A1	NA	-0.00061964	NA	NA	NA	NA	NA	-0.0862688	NA	NA	NA	NA	NA	NA	NA	NA	NA	-0.196244	NA	NA	NA	NA	NA	NA	NA	NA	NA	NA	NA	NA	NA	NA	NA	1	0	1	3
chr19:6833733-6833907	VAV1	NA	NA	NA	NA	NA	NA	NA	NA	NA	NA	NA	NA	NA	-0.00047458	NA	NA	NA	NA	NA	NA	NA	NA	NA	NA	NA	NA	NA	NA	NA	NA	NA	NA	NA	1	0	1	1
chr1:145849712-145850231	PIAS3	NA	-0.122396	-0.163013	-0.672881	-0.601737	NA	NA	0.224805	0.691285	-0.62437	NA	0.168282	-0.305423	-0.0322648	0.0540925	NA	-0.0707852	-0.652448	-0.349327	0.147981	-0.618432	NA	0.0203441	NA	-0.296475	-0.601149	0.0641736	0.765279	-0.627409	0.867563	0.0879243	0.180649	NA	1	1	2	25
chr7:50604085-50604310	GRB10	NA	NA	NA	NA	NA	NA	NA	0.39104	NA	NA	NA	NA	NA	-0.016539	NA	NA	NA	NA	NA	NA	NA	NA	NA	NA	NA	NA	-0.618684	NA	NA	NA	NA	NA	NA	1	0	1	3
chr6:52507623-52508233	TRAM2	NA	NA	NA	NA	NA	NA	NA	NA	NA	NA	NA	NA	NA	-0.0160152	NA	NA	NA	NA	NA	NA	NA	NA	NA	NA	NA	NA	NA	NA	NA	NA	NA	NA	NA	1	0	1	1
chr5:81448825-81461054	SSBP2	NA	NA	NA	NA	NA	NA	NA	NA	NA	NA	NA	NA	NA	-0.0127954	NA	NA	NA	NA	NA	NA	NA	NA	NA	NA	NA	NA	NA	NA	NA	NA	NA	NA	NA	1	0	1	1
chrX:20132263-20133956	EIF1AX	NA	NA	NA	NA	NA	NA	NA	NA	NA	NA	NA	NA	NA	-0.014593	NA	NA	NA	NA	NA	NA	NA	NA	NA	NA	NA	NA	NA	NA	NA	NA	NA	NA	NA	1	0	1	1
chr5:140698078-140698492	HARS2	0.834226	-0.0160394	-0.22485	-0.402375	-0.346342	0.0679792	-0.273615	-0.135686	0.221519	NA	0.641785	8.832e-05	0.35088	-0.250349	-0.450223	NA	-0.362729	-0.7311	0.165861	0.836868	-0.408712	-0.659989	0.373491	0.543463	0.0156516	-0.0580996	0.0863488	-0.543996	0.220419	0.327035	NA	0.130293	NA	1	2	3	29
chr12:71664580-71664868	THAP2	NA	0.234696	NA	0.759044	NA	NA	NA	-0.304855	-0.857591	NA	NA	NA	NA	NA	0.417811	NA	NA	-0.0255009	NA	-0.0805889	NA	NA	NA	NA	NA	NA	NA	NA	NA	-0.581011	NA	NA	NA	1	0	1	8
chr5:157789567-157791702	CLINT1	0.634077	-0.119037	-0.0892095	-0.222169	0.325971	0.121721	0.139789	0.090398	0.398084	NA	NA	2.304e-05	-0.343575	-0.00095043	0.392462	-0.364436	0.576479	-0.734928	-0.379954	NA	-0.197335	0.206484	NA	NA	-0.278504	-0.160837	NA	-0.0388905	0.528665	NA	NA	-0.0377686	-0.266837	3	1	4	25
chr12:7137110-7137954	CLSTN3	NA	-0.189191	NA	NA	NA	NA	NA	0.73477	NA	NA	NA	0.000125	-0.0605337	-0.165929	NA	NA	-0.196631	-0.335565	NA	NA	0.0417458	0.207869	NA	NA	NA	NA	-0.558449	NA	NA	NA	NA	NA	NA	0	2	2	10
chr11:45924677-45924784	LARGE2	NA	-0.849549	-0.0258826	-0.307896	NA	-0.219221	NA	0.706013	NA	-0.774001	0.424157	NA	-0.377784	NA	NA	NA	0.309215	-0.436475	NA	0.452186	NA	NA	0.216293	-0.886685	NA	NA	-0.216118	0.459317	0.0578551	0.638543	0.654922	NA	NA	1	0	1	18
chr11:62885357-62885464	SLC3A2	NA	NA	NA	NA	NA	NA	NA	NA	NA	NA	NA	NA	NA	-0.0393359	NA	NA	NA	NA	NA	NA	NA	NA	NA	NA	NA	NA	NA	NA	NA	NA	NA	NA	NA	1	0	1	1
chr22:45197216-45197789	KIAA0930	NA	NA	0.166364	NA	NA	NA	NA	NA	NA	NA	NA	NA	NA	-0.00553021	NA	NA	NA	NA	NA	NA	NA	NA	NA	NA	NA	NA	NA	NA	NA	NA	NA	NA	NA	1	0	1	2
chr3:51944910-51944997	PARP3	0.688845	0.355318	0.116037	-0.0404831	0.355881	NA	0.498796	0.642496	-0.282238	NA	0.590967	0.0714662	0.180749	-0.149515	0.800005	NA	-0.0101716	-0.669132	0.210614	-0.141135	-0.275056	NA	NA	NA	0.353708	0.276454	0.453126	NA	0.0963351	NA	NA	NA	NA	2	0	2	22
chr16:30504264-30505246	ITGAL	NA	NA	NA	NA	NA	NA	NA	NA	NA	NA	NA	NA	NA	-0.0106488	NA	NA	NA	NA	NA	NA	NA	NA	NA	NA	NA	NA	NA	NA	NA	NA	NA	NA	NA	1	0	1	1
chr12:49558729-49558842	MCRS1	NA	NA	NA	NA	NA	NA	NA	NA	NA	NA	NA	NA	NA	-0.00235806	NA	NA	NA	-0.746043	NA	NA	NA	NA	NA	NA	NA	NA	NA	NA	NA	NA	NA	-0.875629	NA	1	0	1	3
chr11:71960891-71982760	RNF121	NA	NA	NA	NA	NA	NA	NA	NA	NA	NA	NA	NA	NA	-0.00620736	NA	NA	NA	NA	NA	NA	NA	NA	NA	NA	NA	NA	NA	NA	NA	NA	NA	NA	NA	1	0	1	1
chr6:31764159-31764265	SAPCD1	NA	0.396451	0.3073	0.351273	-0.743816	-0.258301	0.618444	0.313299	0.537248	NA	NA	-0.0333186	-0.0116379	-0.839458	-0.102829	-0.545193	0.670793	0.208682	NA	0.251847	-0.0486281	-0.844903	-0.129126	0.168478	NA	NA	0.0827569	0.0352948	-0.79019	0.0471894	-0.400009	0.248073	NA	3	2	5	26
chr16:29830674-29830877	MVP	NA	NA	NA	NA	NA	NA	NA	NA	NA	NA	NA	NA	NA	-0.000581	NA	NA	NA	NA	NA	NA	NA	NA	NA	NA	NA	NA	NA	NA	NA	NA	NA	NA	NA	1	0	1	1
chr11:85696388-85697978	SYTL2	NA	NA	NA	NA	NA	NA	NA	0.0991954	NA	NA	NA	0.00144713	-0.318183	NA	NA	NA	NA	NA	NA	NA	-0.147598	NA	NA	NA	NA	NA	0.5446	NA	NA	NA	NA	NA	NA	0	1	1	5
chr17:38809765-38810275	CWC25	NA	NA	NA	NA	NA	NA	NA	-0.274584	NA	NA	NA	0.00028779	NA	-0.121046	NA	NA	NA	NA	NA	NA	NA	NA	NA	NA	NA	NA	0.303727	NA	NA	NA	NA	NA	NA	0	1	1	4
chr16:81699801-81701659	CMIP	NA	-0.0295628	NA	NA	NA	NA	NA	NA	NA	NA	NA	NA	-0.0877943	NA	NA	NA	-0.243775	NA	NA	NA	-0.573522	NA	NA	NA	NA	NA	NA	NA	NA	NA	NA	NA	NA	1	0	1	4
chr15:44573745-44574901	SPG11	NA	NA	NA	NA	NA	NA	NA	NA	NA	NA	NA	NA	NA	-0.0460046	NA	NA	NA	NA	NA	NA	NA	NA	NA	NA	NA	NA	0.138132	NA	NA	NA	NA	NA	NA	1	0	1	2
chr17:76626095-76626288	ST6GALNAC1	NA	NA	NA	NA	NA	0.0328145	NA	0.0833802	NA	NA	NA	NA	NA	NA	NA	NA	-0.337019	NA	NA	-0.779406	-0.233201	NA	NA	0.751587	NA	NA	0.544856	NA	NA	NA	NA	NA	NA	0	1	1	7
chr2:85394958-85395537	CAPG	NA	NA	NA	NA	NA	NA	NA	NA	NA	NA	NA	NA	NA	-0.00188309	NA	NA	NA	NA	NA	NA	NA	NA	NA	NA	NA	NA	NA	NA	NA	NA	NA	NA	NA	1	0	1	1
chr17:80138280-80139020	EIF4A3	NA	NA	NA	NA	NA	NA	NA	NA	NA	NA	NA	NA	NA	-0.00829886	NA	NA	NA	NA	NA	NA	NA	NA	NA	NA	NA	NA	NA	NA	NA	NA	NA	NA	NA	1	0	1	1
chr14:65044443-65053237	CHURC1-FNTB	NA	NA	NA	NA	NA	NA	NA	NA	NA	NA	NA	NA	NA	-0.0415186	NA	NA	NA	NA	NA	NA	NA	NA	NA	NA	NA	NA	NA	NA	NA	NA	NA	NA	NA	1	0	1	1
chr4:109510111-109511956	SEC24B	NA	NA	NA	NA	NA	NA	NA	NA	NA	NA	NA	NA	NA	-0.00284086	NA	NA	NA	NA	NA	NA	NA	NA	NA	NA	NA	NA	NA	NA	NA	NA	NA	NA	NA	1	0	1	1
chr11:64827783-64829470	CDC42BPG	NA	0.242269	-0.0143498	0.245365	0.597117	NA	NA	0.275187	NA	0.033399	NA	NA	0.326449	NA	NA	NA	-0.0606515	-0.497621	NA	-0.321268	0.586493	NA	NA	NA	NA	NA	0.336154	NA	-0.58196	-0.522677	NA	NA	NA	1	1	2	14
chr1:19081573-19084503	UBR4	NA	NA	NA	NA	NA	NA	NA	NA	NA	NA	NA	NA	NA	-0.0364204	NA	NA	NA	NA	NA	NA	NA	NA	NA	NA	NA	NA	NA	NA	NA	NA	NA	NA	NA	1	0	1	1
chr9:94446936-94451455	MFSD14B	NA	NA	NA	NA	NA	NA	NA	NA	NA	NA	NA	NA	NA	-0.0178294	NA	NA	NA	NA	NA	NA	NA	NA	NA	NA	NA	NA	0.122387	NA	NA	NA	NA	NA	NA	1	0	1	2
chr3:49425438-49425882	AC104452.1	NA	NA	NA	NA	NA	NA	NA	-0.0289933	-0.455972	NA	NA	0.231487	-0.046338	-0.291745	0.109595	NA	NA	NA	NA	0.293536	NA	NA	NA	NA	NA	NA	0.212899	NA	NA	NA	NA	NA	NA	2	0	2	8
chr14:24187579-24187666	IPO4	NA	NA	NA	NA	NA	NA	NA	NA	NA	NA	NA	NA	NA	-0.0361878	NA	NA	NA	NA	NA	NA	NA	NA	NA	NA	NA	NA	NA	NA	NA	NA	NA	NA	NA	1	0	1	1
chr12:47747862-47748073	RAPGEF3	NA	NA	NA	NA	NA	NA	NA	NA	NA	NA	NA	NA	NA	NA	NA	NA	NA	NA	NA	-0.0344017	NA	NA	NA	NA	NA	NA	NA	NA	NA	NA	NA	NA	NA	1	0	1	1
chr19:39388676-39388761	PAF1	NA	NA	NA	NA	NA	NA	NA	NA	NA	NA	NA	NA	NA	-0.0301311	NA	NA	NA	NA	NA	NA	NA	NA	NA	NA	NA	NA	NA	NA	NA	NA	NA	NA	NA	1	0	1	1
chr15:41757839-41760322	MGA	NA	NA	NA	NA	NA	NA	NA	NA	NA	NA	NA	NA	NA	-0.00578212	NA	NA	NA	NA	NA	NA	NA	NA	NA	NA	NA	NA	NA	NA	NA	NA	NA	NA	NA	1	0	1	1
chr1:27956082-27958475	SMPDL3B	NA	NA	NA	NA	NA	NA	NA	NA	NA	NA	NA	NA	NA	NA	NA	NA	-0.0499353	NA	NA	NA	NA	NA	NA	NA	NA	NA	NA	NA	NA	NA	NA	NA	NA	1	0	1	1
chr6:161153499-161154148	AGPAT4	NA	NA	NA	NA	NA	NA	NA	-0.523292	0.113076	NA	NA	0.131682	-0.470762	NA	0.911732	NA	NA	NA	-0.152827	-0.0979251	-0.132249	0.81594	NA	NA	-0.358499	NA	NA	-0.00876583	NA	NA	NA	0.139065	NA	1	0	1	12
chr1:52353647-52354607	CC2D1B	NA	NA	NA	NA	NA	NA	NA	-0.423106	NA	NA	NA	0.302182	NA	-0.0298785	NA	NA	NA	NA	NA	NA	NA	NA	NA	NA	NA	NA	NA	NA	NA	NA	NA	NA	NA	1	0	1	3
chr14:92653075-92659160	RIN3	NA	NA	NA	NA	NA	NA	NA	NA	NA	NA	NA	NA	NA	-0.0285026	NA	NA	NA	NA	NA	NA	NA	NA	NA	NA	NA	NA	NA	NA	NA	NA	NA	NA	NA	1	0	1	1
chr17:63809659-63810512	DDX42	NA	NA	NA	NA	NA	NA	NA	NA	NA	NA	NA	NA	NA	-0.0407136	NA	NA	NA	NA	NA	NA	NA	NA	NA	NA	NA	NA	NA	NA	NA	NA	NA	NA	NA	1	0	1	1
chr3:47420772-47420930	SCAP	NA	NA	NA	NA	NA	NA	NA	NA	NA	NA	NA	NA	NA	-0.00879403	NA	NA	NA	NA	NA	NA	NA	NA	NA	NA	NA	NA	NA	NA	NA	NA	NA	NA	NA	1	0	1	1
chr1:113767207-113768221	RSBN1	NA	NA	NA	NA	NA	NA	NA	0.357609	NA	NA	NA	NA	NA	-0.0119628	NA	NA	NA	NA	NA	NA	NA	NA	NA	NA	NA	NA	NA	NA	NA	NA	NA	NA	NA	1	0	1	2
chr11:130238556-130239811	ZBTB44	NA	NA	NA	NA	NA	NA	NA	NA	NA	NA	NA	NA	NA	-0.00923469	NA	NA	NA	NA	NA	NA	NA	NA	NA	NA	NA	NA	NA	NA	NA	NA	NA	NA	NA	1	0	1	1
chr4:3420718-3422375	RGS12	NA	NA	NA	-0.745895	NA	NA	NA	-0.225899	NA	NA	NA	0.0350792	0.224413	NA	NA	NA	NA	NA	NA	NA	NA	NA	NA	NA	NA	NA	NA	NA	NA	NA	NA	NA	NA	0	1	1	4
chr22:29328895-29330377	AP1B1	NA	NA	NA	NA	NA	NA	NA	NA	NA	NA	NA	NA	NA	-0.0392875	NA	NA	NA	NA	NA	NA	NA	NA	NA	NA	NA	NA	NA	NA	NA	NA	NA	NA	NA	1	0	1	1
chr17:58304399-58305060	TSPOAP1	NA	NA	NA	NA	NA	NA	NA	NA	NA	NA	NA	NA	NA	0.0375809	NA	NA	NA	NA	NA	NA	NA	NA	NA	NA	NA	NA	NA	NA	NA	NA	NA	NA	NA	0	1	1	1
chr4:119512970-119528739	AC093752.1	NA	NA	NA	NA	NA	NA	NA	NA	NA	NA	NA	NA	NA	-0.00165146	NA	NA	NA	NA	NA	NA	NA	NA	NA	NA	NA	NA	NA	NA	NA	NA	NA	NA	NA	1	0	1	1
chr14:20357149-20357395	PARP2	0.453969	-0.00203556	0.552055	-0.349378	0.608051	0.199341	0.0906762	-0.053155	-0.367282	-0.743069	0.900349	0.0354807	-0.0398769	-0.532722	-0.00021041	-0.0663105	-0.234526	-0.0950074	-0.123305	0.489033	-0.121002	-0.239972	0.00209607	NA	-0.253202	-0.734293	-0.362952	-0.52194	0.435803	0.249243	-0.51832	0.805473	-0.180596	3	2	5	32
chr2:241678649-241680228	DTYMK	NA	NA	NA	NA	0.40362	NA	NA	0.211226	NA	NA	NA	NA	0.398004	-0.00037027	-0.11403	NA	-0.0364503	NA	NA	NA	-0.737021	NA	NA	NA	NA	NA	NA	-0.142373	NA	NA	NA	NA	NA	2	0	2	8
chr22:31098840-31099061	SMTN	NA	NA	NA	NA	NA	NA	NA	NA	NA	NA	NA	NA	NA	NA	NA	NA	NA	NA	NA	-0.00538362	NA	NA	NA	NA	NA	NA	NA	NA	NA	NA	NA	NA	NA	1	0	1	1
chr17:76625527-76625818	ST6GALNAC1	NA	NA	NA	0.466554	NA	0.0351447	NA	0.204291	NA	NA	NA	NA	NA	NA	NA	NA	-0.660217	NA	NA	-0.145075	-0.712536	NA	0.478176	0.351608	NA	NA	0.81059	NA	NA	NA	0.0677598	NA	NA	0	1	1	10
chr7:40002031-40045835	CDK13	NA	NA	NA	NA	NA	NA	NA	NA	NA	NA	NA	NA	NA	-0.00050688	NA	NA	NA	NA	NA	NA	NA	NA	NA	NA	NA	NA	NA	NA	NA	NA	NA	NA	NA	1	0	1	1
chr8:144472484-144472576	KIFC2	NA	0.466647	NA	NA	-0.388834	-0.301155	NA	-0.0449911	0.601675	-0.353271	NA	NA	NA	-0.580127	NA	NA	NA	0.516188	NA	0.645898	NA	NA	NA	NA	NA	NA	-0.277669	NA	NA	NA	NA	NA	NA	1	0	1	10
chr7:151077027-151077100	FASTK	0.0311637	-0.0122605	-0.065664	-0.205927	-0.417082	0.109371	-0.41524	0.0436435	0.59278	-0.00908604	-0.596162	0.00108514	0.317332	-0.118494	0.0464953	0.550165	0.377893	0.524187	0.143012	0.468793	-0.0214259	-0.705633	0.00039084	-0.0969222	0.436068	0.120146	-0.0650777	0.262771	0.323001	-0.232326	0.142146	-0.328351	0.0447323	3	6	9	33
chr21:43750545-43752517	PDXK	NA	NA	NA	NA	NA	NA	NA	NA	NA	NA	NA	NA	NA	-0.0340396	NA	NA	NA	NA	NA	NA	NA	NA	NA	NA	NA	NA	NA	NA	NA	NA	NA	NA	NA	1	0	1	1
chr3:183025804-183033990	MCCC1	NA	NA	-0.0510557	NA	NA	NA	NA	0.410002	NA	NA	-0.998248	0.610647	-0.303255	-0.00102706	NA	NA	0.108882	0.0638703	NA	NA	NA	NA	0.0379777	NA	NA	NA	0.681118	NA	-0.274971	NA	NA	NA	NA	1	1	2	11
chr17:63834800-63835411	SMARCD2	0.47593	NA	NA	NA	NA	NA	NA	NA	-0.307578	NA	NA	NA	-0.517136	-0.0408074	-0.00259619	NA	NA	NA	NA	NA	NA	0.999162	NA	NA	NA	NA	NA	NA	NA	NA	NA	0.231042	NA	2	0	2	7
chr11:116783619-116784377	ZPR1	NA	NA	NA	NA	NA	NA	NA	NA	NA	NA	NA	NA	NA	-0.0197108	NA	NA	NA	NA	NA	NA	NA	NA	NA	NA	NA	NA	NA	NA	NA	NA	NA	NA	NA	1	0	1	1
chr3:127606817-127608381	MCM2	NA	NA	NA	NA	NA	NA	NA	NA	NA	NA	NA	NA	NA	-0.0139507	NA	NA	NA	NA	NA	NA	NA	NA	NA	NA	NA	NA	NA	NA	NA	NA	NA	NA	NA	1	0	1	1
chr11:72231189-72231497	INPPL1	NA	-0.664339	NA	NA	NA	NA	NA	NA	NA	NA	NA	NA	NA	-0.0258326	NA	NA	NA	-0.243351	NA	NA	NA	NA	NA	NA	NA	NA	NA	NA	NA	NA	NA	NA	NA	1	0	1	3
chr11:65186050-65186169	CAPN1	NA	NA	NA	NA	NA	NA	NA	NA	NA	NA	NA	NA	NA	-0.00279358	NA	NA	NA	NA	NA	NA	NA	NA	NA	NA	NA	NA	NA	NA	NA	NA	NA	NA	NA	1	0	1	1
chr21:38402637-38403505	ERG	NA	NA	NA	NA	NA	NA	NA	NA	NA	NA	NA	NA	NA	-0.00826411	NA	NA	NA	NA	NA	NA	NA	NA	NA	NA	NA	NA	NA	NA	NA	NA	NA	NA	NA	1	0	1	1
chr8:144291874-144308905	HSF1	NA	NA	NA	NA	NA	NA	NA	NA	NA	NA	NA	NA	NA	-0.0120684	NA	NA	NA	NA	NA	NA	NA	NA	NA	NA	NA	NA	NA	NA	NA	NA	NA	NA	NA	1	0	1	1
chr9:121150483-121152484	CNTRL	NA	NA	NA	NA	NA	NA	NA	NA	NA	NA	NA	NA	NA	-0.0120121	NA	NA	NA	NA	NA	NA	NA	NA	NA	NA	NA	NA	NA	NA	NA	NA	NA	NA	NA	1	0	1	1
chr9:137023052-137023837	ABCA2	NA	NA	NA	NA	NA	NA	NA	NA	NA	NA	0.368635	NA	NA	-0.600469	0.00050436	NA	NA	NA	NA	NA	NA	NA	NA	NA	NA	NA	NA	NA	NA	NA	NA	NA	NA	0	1	1	3
chr5:178603757-178603843	CLK4	NA	NA	NA	0.0783237	NA	NA	-0.0554511	0.926179	NA	NA	NA	0.00133986	-0.733074	-0.0533023	NA	NA	NA	NA	NA	-0.724759	NA	NA	-0.0794977	NA	NA	NA	-0.0276018	NA	0.311456	NA	NA	0.161366	NA	1	1	2	11
chr13:110635588-110637128	NAXD	NA	-0.388468	-0.00095606	-0.337588	-0.136314	0.620918	-0.393012	0.378662	NA	0.636677	NA	0.00072869	0.462107	-0.182429	NA	NA	-0.231222	-0.38499	-0.600358	-0.27405	-0.247284	0.971925	NA	-0.432484	0.068187	0.620839	0.192068	-0.357691	NA	-0.760187	NA	NA	-0.482059	1	1	2	24
chr2:74522771-74522855	DQX1	NA	NA	NA	-0.0317378	NA	NA	NA	NA	NA	NA	NA	NA	NA	NA	NA	NA	NA	NA	NA	NA	NA	NA	NA	NA	NA	NA	NA	NA	NA	NA	NA	NA	NA	1	0	1	1
chr17:64485868-64490795	POLG2	NA	NA	-0.00102324	NA	NA	NA	NA	0.776015	NA	NA	NA	NA	NA	-0.227458	NA	NA	-0.272281	-0.0596863	NA	0.362189	NA	NA	NA	NA	NA	0.934407	0.0412571	-0.285742	NA	NA	NA	NA	NA	1	1	2	9
chr10:114448020-114451623	ABLIM1	NA	NA	NA	NA	NA	NA	NA	0.159573	NA	NA	NA	0.00698907	NA	NA	NA	NA	NA	NA	NA	-0.12968	NA	NA	NA	NA	NA	NA	0.254941	NA	0.681991	NA	NA	NA	NA	0	1	1	5
chr16:5027379-5027845	NAGPA	0.0444457	NA	NA	NA	NA	NA	NA	0.685834	-0.347092	NA	NA	NA	-0.21194	-0.626479	0.802892	NA	NA	NA	NA	0.157917	NA	NA	NA	NA	NA	NA	NA	-0.848337	NA	NA	NA	NA	NA	0	1	1	8
chr1:13773188-13778417	PRDM2	NA	NA	NA	NA	NA	NA	NA	NA	NA	NA	NA	NA	NA	-0.0197581	NA	NA	NA	NA	NA	NA	NA	NA	NA	NA	NA	NA	NA	NA	NA	NA	NA	NA	NA	1	0	1	1
chr8:38918070-38935993	PLEKHA2	NA	NA	NA	NA	NA	NA	NA	NA	NA	NA	NA	NA	NA	-0.0474381	NA	NA	NA	NA	NA	NA	NA	NA	NA	NA	NA	NA	NA	NA	NA	NA	NA	NA	NA	1	0	1	1
chr12:51048478-51049033	LETMD1	-0.352508	-0.17905	0.290956	-0.144853	-0.162169	0.0834324	0.195777	0.868001	-0.0852565	-0.0946742	-0.414661	3e-08	0.34779	0.731373	-0.0138736	-0.807074	0.255493	0.886977	0.0473626	-0.434598	0.142772	0.171374	0.161452	0.306144	0.28695	0.0532639	0.0643352	0.453389	0.273084	0.445772	NA	-0.416851	NA	1	2	3	31
chr18:2929158-2931255	LPIN2	NA	NA	NA	NA	NA	NA	NA	NA	NA	NA	NA	NA	NA	-0.0281641	NA	NA	NA	NA	NA	NA	NA	NA	NA	NA	NA	NA	NA	NA	NA	NA	NA	NA	NA	1	0	1	1
chr17:27577639-27582645	KSR1	NA	NA	NA	NA	NA	NA	NA	0.102309	NA	NA	NA	NA	NA	-0.0287475	NA	NA	NA	NA	NA	NA	NA	NA	NA	NA	NA	NA	NA	NA	NA	NA	NA	NA	NA	1	0	1	2
chr7:149722956-149723733	KRBA1	NA	NA	NA	NA	NA	NA	NA	0.663362	NA	NA	NA	0.00016472	NA	NA	NA	NA	NA	NA	NA	NA	NA	NA	NA	NA	NA	NA	NA	NA	NA	NA	NA	NA	NA	0	1	1	2
chr9:136366845-136367215	CARD9	NA	NA	NA	NA	NA	NA	NA	NA	NA	NA	NA	NA	NA	-0.0407258	NA	NA	NA	NA	NA	-0.0303397	NA	NA	NA	NA	NA	NA	NA	NA	NA	NA	NA	NA	NA	2	0	2	2
chr19:19303847-19305848	SUGP1	-0.169337	NA	-0.198078	0.325078	-0.821816	NA	-0.373885	0.641093	0.599862	NA	NA	5.028e-05	-0.660872	-0.0914754	-0.35063	NA	-0.0283798	0.779173	-0.38989	-0.785403	-0.134655	0.193573	0.0471252	NA	0.769531	0.719533	0.69442	-0.198317	-0.885617	0.359669	NA	-0.392421	0.724632	1	2	3	26
chr5:65567615-65569631	PPWD1	NA	NA	0.486437	0.628416	NA	NA	-0.76474	0.316276	NA	NA	NA	0.00365436	NA	-0.621611	-0.0484854	NA	0.324264	NA	NA	NA	-0.0290558	NA	NA	NA	NA	0.674488	-0.647267	-0.404463	-0.0718708	NA	NA	NA	NA	2	1	3	13
chr12:118266759-118358918	TAOK3	NA	NA	NA	NA	NA	NA	NA	NA	NA	NA	NA	NA	NA	-0.00599782	NA	NA	NA	NA	NA	NA	NA	NA	NA	NA	NA	NA	NA	NA	NA	NA	NA	NA	NA	1	0	1	1
chr6:34970166-34981689	ANKS1A	NA	NA	NA	NA	NA	NA	NA	NA	NA	NA	NA	NA	NA	-0.00492048	NA	NA	NA	NA	NA	NA	NA	NA	NA	NA	NA	NA	NA	NA	NA	NA	NA	NA	NA	1	0	1	1
chr17:39917321-39918533	GSDMB	NA	-0.331566	NA	-0.169979	NA	0.102005	NA	-0.733799	NA	NA	NA	NA	NA	NA	NA	NA	NA	NA	NA	NA	0.0599746	NA	NA	0.00835048	NA	NA	0.0822496	NA	NA	NA	NA	NA	NA	0	1	1	7
chr19:868499-868862	MED16	NA	0.325004	0.210707	-0.00209053	0.351551	0.244332	NA	NA	NA	-0.582809	NA	-0.690619	0.558385	-0.00023384	NA	NA	-0.158608	-0.0391908	-0.031774	NA	0.644424	NA	NA	-0.900495	-0.0554328	NA	-0.0206819	-0.591479	0.241297	0.185467	NA	NA	NA	5	0	5	19
chr9:128268524-128272784	GOLGA2	NA	NA	NA	NA	NA	NA	NA	NA	NA	NA	NA	NA	NA	-0.00278158	NA	NA	NA	NA	NA	NA	NA	NA	NA	NA	NA	NA	NA	NA	NA	NA	NA	NA	NA	1	0	1	1
chr12:69257905-69258034	CPSF6	NA	NA	NA	NA	NA	NA	NA	NA	NA	NA	NA	NA	NA	-0.0499027	NA	NA	NA	NA	NA	NA	NA	NA	NA	NA	NA	NA	NA	NA	NA	NA	NA	NA	NA	1	0	1	1
chr16:1352159-1352238	GNPTG	0.139138	0.64636	NA	NA	-0.666538	NA	NA	NA	-0.0395542	NA	NA	NA	NA	0.728238	-0.27911	NA	NA	-0.301581	NA	NA	NA	-0.82993	NA	NA	0.141652	NA	NA	-0.432037	NA	NA	NA	-0.385134	NA	1	0	1	11
chr19:39389015-39389092	PAF1	NA	NA	NA	NA	NA	NA	NA	NA	NA	NA	NA	NA	NA	-0.0254514	NA	NA	NA	NA	NA	NA	NA	NA	NA	NA	NA	NA	NA	NA	NA	NA	NA	NA	NA	1	0	1	1
chr3:42563686-42568864	SEC22C	NA	NA	NA	NA	NA	NA	NA	NA	NA	NA	NA	NA	NA	-1.59e-05	NA	NA	NA	NA	NA	NA	NA	NA	NA	NA	NA	NA	NA	NA	NA	NA	NA	NA	NA	1	0	1	1
chr3:50580229-50580380	HEMK1	-0.456631	-0.0160955	-0.0637588	0.502545	-0.309628	0.0293515	-0.295392	0.757988	-0.260375	NA	0.190918	0.240447	0.719136	-0.494272	-0.818485	NA	0.270945	-0.188835	0.117822	0.0158216	-0.0593201	0.520411	0.237109	-0.346446	-0.668624	0.0340697	0.42199	-0.240757	0.0868125	0.436666	-0.503297	0.247902	NA	1	3	4	30
chr14:102040673-102041573	DYNC1H1	NA	NA	NA	NA	NA	NA	NA	NA	NA	NA	NA	NA	NA	-0.0268968	NA	NA	NA	NA	NA	NA	NA	NA	NA	NA	NA	NA	NA	NA	NA	NA	NA	NA	NA	1	0	1	1
chr16:31474757-31476011	TGFB1I1	NA	NA	NA	NA	NA	NA	NA	NA	NA	NA	NA	0.0198328	NA	NA	NA	NA	NA	NA	-0.0335406	-0.0549695	0.328321	NA	NA	NA	NA	NA	NA	NA	-0.0774525	NA	NA	NA	NA	1	1	2	5
chr1:116062882-116064435	SLC22A15	NA	NA	NA	NA	NA	NA	NA	NA	NA	NA	NA	NA	NA	-0.0025435	NA	NA	NA	NA	NA	NA	NA	NA	NA	NA	NA	NA	NA	NA	NA	NA	NA	NA	NA	1	0	1	1
chr22:20994269-20994557	LZTR1	0.0939635	-5.823e-05	-0.100332	0.777735	0.194964	0.295984	0.0847782	0.861772	0.622473	0.495641	0.249279	0.00089158	-0.256937	-0.0950311	0.682912	-0.431323	-0.22067	-0.61888	-0.252288	-0.245457	-0.459726	-0.89008	0.0168841	0.0921685	0.153027	0.315	-0.427093	-0.894047	-0.709191	0.492874	0.828411	0.21854	-0.645877	1	2	3	33
chr11:113236315-113240785	NCAM1	NA	NA	NA	NA	NA	NA	NA	NA	NA	NA	NA	NA	NA	NA	0.00513109	NA	NA	NA	NA	NA	NA	NA	NA	NA	NA	NA	NA	NA	NA	NA	NA	NA	NA	0	1	1	1
chr16:1743476-1747028	MAPK8IP3	NA	NA	NA	NA	NA	NA	NA	-0.432089	0.484127	NA	-0.430733	NA	NA	NA	0.0126135	NA	NA	NA	NA	-0.344036	NA	0.236126	NA	NA	NA	NA	NA	NA	NA	NA	NA	NA	NA	0	1	1	6
chr1:156134975-156135186	LMNA	NA	NA	NA	NA	NA	NA	NA	NA	NA	NA	NA	NA	NA	-0.00076173	NA	NA	NA	NA	NA	NA	NA	NA	NA	NA	NA	NA	NA	NA	NA	NA	NA	NA	NA	1	0	1	1
chr12:110645129-110647195	TCTN1	NA	NA	NA	NA	NA	NA	NA	NA	-0.0223662	NA	NA	NA	NA	NA	NA	NA	NA	NA	NA	-0.828489	NA	NA	NA	NA	NA	NA	NA	NA	NA	NA	NA	NA	NA	1	0	1	2
chr11:31650221-31783392	ELP4	NA	NA	NA	NA	NA	NA	NA	NA	NA	NA	NA	NA	NA	-9.038e-05	NA	NA	NA	NA	NA	NA	NA	NA	NA	NA	NA	NA	NA	NA	NA	NA	NA	NA	NA	1	0	1	1
chr1:8365974-8422726	RERE	NA	NA	NA	NA	NA	NA	NA	NA	NA	NA	NA	NA	NA	-0.00017654	NA	NA	NA	NA	NA	NA	NA	NA	NA	NA	NA	NA	NA	NA	NA	NA	NA	NA	NA	1	0	1	1
chr7:80656700-80661062	CD36	NA	NA	NA	NA	NA	NA	NA	NA	NA	NA	NA	NA	NA	-0.00052534	NA	NA	NA	NA	NA	NA	NA	NA	NA	NA	NA	NA	NA	NA	NA	NA	NA	NA	NA	1	0	1	1
chr10:124993985-124994468	CTBP2	NA	NA	NA	NA	NA	NA	NA	NA	NA	NA	NA	NA	NA	-0.00150264	NA	NA	NA	NA	NA	NA	NA	NA	NA	NA	NA	NA	NA	NA	NA	NA	NA	NA	NA	1	0	1	1
chr7:105125874-105126992	SRPK2	NA	NA	NA	NA	NA	NA	NA	NA	NA	NA	NA	NA	NA	-0.0346647	NA	NA	NA	NA	NA	NA	NA	NA	NA	NA	NA	NA	NA	NA	NA	NA	NA	NA	NA	1	0	1	1
chr19:7933570-7933863	TIMM44	-0.138575	-0.061888	-0.0908807	-0.381365	-0.775186	0.0986198	NA	0.143316	-0.276885	NA	-0.431451	0.0899171	0.626423	-0.0102115	0.64086	-0.899594	-0.146293	0.260468	-0.230775	-0.58342	0.623434	0.627822	0.359189	0.367723	0.745744	0.111918	0.557944	-0.13211	0.300801	0.720908	NA	-0.25344	-0.520447	1	0	1	30
chr1:109620278-109625302	AMPD2	NA	NA	NA	NA	NA	NA	NA	-0.401511	NA	NA	NA	NA	NA	-0.00037467	NA	NA	NA	NA	NA	0.620214	NA	0.342798	NA	NA	NA	NA	0.733136	NA	NA	NA	NA	NA	NA	1	0	1	5
chr19:57701145-57701237	ZNF154	NA	NA	NA	NA	NA	NA	NA	NA	-0.153954	NA	NA	NA	NA	NA	0.165876	NA	NA	NA	NA	NA	NA	NA	NA	NA	NA	NA	NA	0.36712	0.0393941	-0.252968	NA	NA	NA	0	1	1	5
chr7:151374243-151375847	NUB1	NA	0.168142	-0.254481	-0.533958	-0.465403	NA	NA	0.790181	-0.326193	NA	0.62159	0.0224533	-0.493713	0.954136	-0.133713	NA	-0.0319748	-0.256695	0.0614854	-0.336661	-0.41571	-0.751034	NA	NA	NA	0.615826	NA	-0.120934	-0.175863	0.314088	NA	-0.204876	NA	1	1	2	22
chr19:34452147-34454259	UBA2	NA	NA	NA	NA	NA	NA	NA	NA	NA	NA	NA	NA	NA	-0.00794871	NA	NA	NA	NA	NA	NA	NA	NA	NA	NA	NA	NA	NA	NA	NA	NA	NA	NA	NA	1	0	1	1
chr7:5199658-5214534	WIPI2	NA	NA	NA	NA	NA	NA	NA	NA	NA	NA	NA	NA	NA	-0.00014979	NA	NA	NA	NA	NA	NA	NA	NA	NA	NA	NA	NA	NA	NA	NA	NA	NA	NA	NA	1	0	1	1
chr11:609720-610195	PHRF1	NA	-0.549109	NA	NA	0.751483	NA	0.285913	-0.0726416	NA	NA	NA	0.225145	NA	-0.0274136	NA	NA	NA	0.0715002	NA	NA	0.209741	NA	NA	NA	NA	NA	-0.183851	NA	NA	NA	NA	NA	NA	1	0	1	9
chr11:68019796-68021484	ALDH3B1	NA	NA	NA	NA	NA	NA	NA	NA	NA	NA	NA	NA	NA	-0.0149215	NA	NA	NA	NA	NA	NA	NA	NA	NA	NA	NA	NA	NA	NA	NA	NA	NA	NA	NA	1	0	1	1
chr17:80371985-80372520	RNF213	NA	NA	NA	NA	NA	NA	NA	NA	NA	NA	NA	0.00938728	NA	-0.0113534	NA	NA	NA	NA	NA	NA	NA	NA	NA	NA	NA	NA	NA	NA	NA	NA	NA	NA	NA	1	1	2	2
chrX:15750165-15764577	CA5B	NA	NA	NA	NA	NA	NA	NA	NA	NA	NA	NA	NA	NA	-0.00777939	NA	NA	NA	NA	NA	NA	NA	NA	NA	NA	NA	NA	NA	NA	NA	NA	NA	NA	NA	1	0	1	1
chr16:11061022-11120614	CLEC16A	NA	NA	NA	NA	NA	NA	NA	NA	NA	NA	NA	NA	NA	-0.0164576	NA	NA	NA	NA	NA	NA	NA	NA	NA	NA	NA	NA	NA	NA	NA	NA	NA	NA	NA	1	0	1	1
chr9:137277907-137278652	TOR4A	NA	NA	NA	NA	NA	NA	NA	0.325868	NA	NA	NA	NA	NA	-0.042134	NA	NA	NA	NA	NA	NA	NA	NA	NA	NA	NA	NA	0.478145	NA	NA	NA	NA	NA	NA	1	0	1	3
chr1:185300343-185300436	IVNS1ABP	NA	NA	NA	NA	NA	NA	NA	NA	NA	NA	NA	NA	NA	-0.0412083	NA	NA	NA	NA	NA	NA	NA	NA	NA	NA	NA	NA	NA	NA	NA	NA	NA	NA	NA	1	0	1	1
chr9:131492260-131494404	PRRC2B	NA	NA	NA	NA	NA	NA	NA	NA	NA	NA	NA	NA	NA	-0.0163859	NA	NA	NA	NA	NA	NA	NA	NA	NA	NA	NA	NA	NA	NA	NA	NA	NA	NA	NA	1	0	1	1
chr8:144084875-144085042	GPAA1	-0.258983	-0.549897	NA	-0.248099	-0.00452828	0.433345	0.68084	0.730624	NA	NA	NA	0.00205894	NA	0.81761	NA	NA	0.648346	0.302187	NA	NA	-0.0525277	NA	NA	-0.033317	0.235635	NA	NA	0.602039	NA	NA	NA	NA	NA	2	1	3	15
chr14:50475149-50476127	MAP4K5	NA	NA	NA	NA	NA	NA	NA	NA	NA	NA	NA	NA	NA	-0.0213102	NA	NA	NA	NA	NA	NA	NA	NA	NA	NA	NA	NA	NA	NA	NA	NA	NA	NA	NA	1	0	1	1
chr22:50437900-50438173	PPP6R2	NA	NA	NA	NA	NA	NA	NA	NA	NA	NA	NA	NA	NA	-0.00125598	NA	NA	NA	NA	NA	NA	NA	NA	NA	NA	NA	NA	NA	NA	NA	NA	NA	NA	NA	1	0	1	1
chr3:14132935-14133738	TMEM43	NA	NA	NA	NA	NA	NA	NA	NA	NA	NA	NA	NA	NA	-0.0117803	NA	NA	NA	NA	NA	NA	NA	NA	NA	NA	NA	NA	NA	NA	NA	NA	NA	NA	NA	1	0	1	1
chr16:67991184-67991837	DPEP2	NA	NA	NA	NA	NA	NA	NA	NA	NA	NA	NA	NA	NA	-0.0119471	NA	NA	NA	NA	NA	NA	NA	NA	NA	NA	NA	NA	NA	NA	NA	NA	NA	NA	NA	1	0	1	1
chr22:30409486-30410595	AC004832.3	NA	NA	NA	NA	NA	NA	NA	0.00782866	NA	NA	NA	NA	NA	NA	NA	NA	NA	NA	NA	NA	NA	NA	NA	NA	NA	NA	NA	NA	NA	NA	NA	NA	NA	0	1	1	1
chr11:819905-821627	PNPLA2	0.861722	-0.0311792	-0.28217	-0.5561	-0.461102	0.043927	0.0913761	-0.524836	0.240064	-0.275808	-0.413348	0.00112409	-0.420207	-0.0582916	-0.433584	0.677811	-0.182216	-0.324237	0.378576	0.0784712	-0.336493	0.285236	0.00904852	-0.0879351	0.942437	0.172626	-0.249728	0.337247	0.543313	0.560444	0.342078	0.258713	0.623541	1	3	4	33
chr16:67166070-67166319	HSF4	-0.351802	0.676801	NA	0.169468	-0.37532	NA	NA	0.0745122	0.521224	NA	-0.478976	0.004744	-0.781419	NA	-0.207358	0.00622401	-0.104901	-0.514423	-0.32859	-0.903697	-0.709667	-0.332429	0.0239744	NA	0.156698	0.160277	0.0442448	NA	0.500411	NA	NA	NA	0.362852	0	4	4	23
chr2:232881250-232882185	NGEF	NA	NA	NA	NA	0.717256	NA	NA	0.0792985	NA	NA	NA	NA	NA	NA	NA	-0.10391	NA	NA	NA	-0.297315	-0.0402791	NA	NA	NA	NA	NA	-0.153469	-0.0518983	NA	NA	NA	NA	NA	1	0	1	7
chr19:8537055-8539946	MYO1F	NA	NA	NA	NA	NA	NA	NA	NA	NA	NA	NA	NA	NA	-0.0008993	NA	NA	NA	NA	NA	NA	NA	NA	NA	NA	NA	NA	NA	NA	NA	NA	NA	NA	NA	1	0	1	1
chr4:75793901-75799621	USO1	NA	NA	NA	NA	NA	NA	NA	NA	NA	NA	NA	NA	NA	-0.0180873	NA	NA	NA	NA	NA	NA	NA	NA	NA	NA	NA	NA	NA	NA	NA	NA	NA	NA	NA	1	0	1	1
chr19:16228208-16228769	AP1M1	NA	NA	NA	NA	NA	NA	NA	NA	NA	NA	NA	NA	NA	-0.0148021	NA	NA	NA	NA	NA	NA	NA	NA	NA	NA	NA	NA	NA	NA	NA	NA	NA	NA	NA	1	0	1	1
chr11:293502-293593	PGGHG	NA	-0.279298	-0.277427	-0.0941933	0.840697	-0.710991	0.276584	0.0881289	0.00867668	0.0869021	-0.331677	0.00150655	0.100272	0.415636	0.0339662	0.0253394	-0.109271	-0.413424	-0.402669	-0.152779	-0.0201375	0.999063	0.00574908	0.183212	-0.336379	0.38417	0.339436	0.280671	0.103989	-0.407673	0.329303	-0.650439	-0.195756	1	5	6	32
chr12:54300276-54300800	NFE2	NA	NA	NA	NA	NA	NA	NA	NA	NA	NA	NA	NA	NA	-0.00341091	NA	NA	NA	NA	NA	NA	NA	NA	NA	NA	NA	NA	NA	NA	NA	NA	NA	NA	NA	1	0	1	1
chr6:85507289-85507967	SNX14	NA	NA	NA	NA	NA	NA	NA	NA	NA	NA	NA	NA	NA	-0.0344228	NA	NA	NA	NA	NA	NA	NA	NA	NA	NA	NA	NA	NA	NA	NA	NA	NA	NA	NA	1	0	1	1
chr1:36343448-36343859	STK40	NA	NA	NA	NA	NA	NA	NA	NA	NA	NA	NA	NA	NA	-0.00709141	NA	NA	NA	NA	NA	NA	NA	NA	NA	NA	NA	NA	NA	NA	NA	NA	NA	NA	NA	1	0	1	1
chr8:30070059-30073876	SARAF	NA	NA	NA	NA	NA	NA	NA	NA	NA	NA	NA	NA	NA	-0.0221007	NA	NA	NA	NA	NA	NA	NA	NA	NA	NA	NA	NA	NA	NA	NA	NA	NA	NA	NA	1	0	1	1
chr22:42595614-42596185	POLDIP3	NA	NA	NA	NA	NA	NA	NA	NA	NA	NA	NA	NA	NA	-0.00260749	NA	NA	NA	NA	NA	NA	NA	NA	NA	NA	NA	NA	NA	NA	NA	NA	NA	NA	NA	1	0	1	1
chr1:225411440-225412453	LBR	NA	-0.0703069	-0.63587	-0.0127779	-0.239477	NA	-0.498449	-0.0500488	0.474659	0.459378	NA	0.0715735	-0.0725509	-0.0441684	-0.0553287	-0.122274	0.208324	-0.497291	NA	-0.1878	-0.56795	NA	0.114126	NA	NA	NA	-0.487074	NA	NA	0.524853	NA	0.285959	NA	2	0	2	21
chr17:40479842-40480699	TNS4	NA	0.423122	NA	0.256868	NA	0.58469	NA	0.235169	NA	NA	NA	NA	NA	NA	NA	NA	NA	-0.0420918	NA	NA	-0.148291	NA	NA	0.131505	NA	NA	0.377355	NA	NA	NA	NA	NA	NA	1	0	1	8
chr3:195960086-195963299	SDHAP1	NA	0.138692	0.642729	0.245914	-0.0140925	NA	NA	0.22882	-0.48095	NA	0.265552	0.417401	-0.69261	-0.937611	0.150865	NA	0.401591	-0.216083	0.314241	-0.160431	-0.479624	0.501866	0.294695	0.064248	0.00463344	-0.038491	0.00502163	-0.686586	0.414333	-0.0846877	NA	0.694111	NA	2	2	4	26
chr19:18922744-18924232	DDX49	NA	NA	NA	NA	NA	NA	NA	NA	NA	NA	NA	NA	NA	-0.00635554	NA	NA	NA	NA	NA	NA	NA	NA	NA	NA	NA	NA	NA	NA	NA	NA	NA	NA	NA	1	0	1	1
chr12:111681835-111683145	BRAP	NA	NA	NA	NA	NA	NA	NA	NA	NA	NA	NA	NA	NA	-0.00739777	NA	NA	NA	NA	NA	NA	NA	NA	NA	NA	NA	NA	NA	NA	NA	NA	NA	NA	NA	1	0	1	1
chr22:45212107-45240639	KIAA0930	NA	NA	NA	NA	NA	NA	NA	NA	NA	NA	NA	NA	NA	-0.0111674	NA	NA	NA	NA	NA	NA	NA	NA	NA	NA	NA	NA	NA	NA	NA	NA	NA	NA	NA	1	0	1	1
chr12:6601053-6601288	CHD4	NA	NA	NA	NA	NA	NA	NA	NA	NA	NA	NA	NA	NA	-0.00167124	NA	NA	NA	NA	NA	NA	NA	NA	NA	NA	NA	NA	NA	NA	NA	NA	NA	NA	NA	1	0	1	1
chr17:63764847-63765911	CCDC47	NA	NA	NA	NA	NA	NA	NA	NA	NA	NA	NA	NA	NA	-0.00487593	NA	NA	NA	NA	NA	NA	NA	NA	NA	NA	NA	NA	NA	NA	NA	NA	NA	NA	NA	1	0	1	1
chr17:2036956-2039754	DPH1	0.156833	-0.137354	-0.0440291	-0.652308	-0.798195	NA	NA	0.63499	-0.707744	NA	-0.359108	0.00232981	0.912067	-0.0206832	-0.492448	NA	-0.615306	0.740502	-0.230232	-0.454587	-0.0715486	0.939945	0.0048673	NA	-0.4477	-0.437859	0.486896	-0.281351	-0.260219	-0.029701	NA	NA	-0.452879	3	2	5	26
chr8:143575345-143575422	NAPRT	-0.0218092	-0.7002	0.1384	0.274518	0.485658	0.221621	0.168541	0.421543	0.491287	NA	NA	0.051784	0.477978	-0.161814	0.482673	NA	-0.649395	0.310468	0.329645	0.616596	-0.197068	-0.99934	0.0934751	-0.255669	0.480512	0.217269	-0.465008	0.11969	NA	0.385743	0.582413	-0.21235	NA	1	0	1	28
chr16:3548218-3548669	NLRC3	NA	NA	NA	NA	NA	NA	NA	NA	NA	NA	NA	NA	NA	-0.00254619	NA	NA	NA	NA	NA	NA	NA	NA	NA	NA	NA	NA	NA	NA	NA	NA	NA	NA	NA	1	0	1	1
chr11:688460-691500	DEAF1	NA	NA	NA	NA	NA	NA	NA	NA	NA	NA	NA	NA	NA	-0.0320625	NA	NA	NA	NA	NA	NA	NA	NA	NA	NA	NA	NA	NA	NA	NA	NA	NA	NA	NA	1	0	1	1
chr3:184187761-184187860	ABCF3	0.336739	-0.135341	NA	0.448204	0.411367	NA	-0.404753	0.518755	NA	NA	NA	0.00058929	-0.555119	-0.15297	0.113796	NA	-0.25645	NA	NA	NA	-0.0719914	-0.290692	NA	NA	NA	NA	-0.00404471	-0.398862	NA	-0.131394	NA	0.700644	NA	1	1	2	17
chr11:65208262-65209322	CAPN1	NA	NA	NA	NA	NA	NA	NA	NA	NA	NA	NA	NA	NA	-4.435e-05	NA	NA	NA	NA	NA	NA	NA	NA	NA	NA	NA	NA	NA	NA	NA	NA	NA	NA	NA	1	0	1	1
chr6:43259706-43262788	TTBK1	NA	NA	NA	NA	NA	NA	NA	NA	-0.142874	NA	NA	NA	NA	NA	0.0420751	NA	NA	NA	NA	NA	NA	NA	NA	NA	NA	NA	NA	NA	NA	NA	NA	NA	NA	0	1	1	2
chr12:65453825-65463154	MSRB3	NA	NA	NA	NA	NA	NA	NA	NA	NA	NA	NA	NA	NA	-9.88e-06	NA	NA	NA	NA	NA	NA	NA	NA	NA	NA	NA	NA	NA	NA	NA	NA	NA	NA	NA	1	0	1	1
chr6:18185810-18187791	KDM1B	NA	NA	NA	NA	NA	NA	NA	NA	NA	NA	NA	NA	NA	-0.0230712	NA	NA	NA	NA	NA	NA	NA	NA	NA	NA	NA	NA	NA	NA	NA	NA	NA	NA	NA	1	0	1	1
chr11:970311-972061	AP2A2	NA	NA	NA	NA	NA	NA	NA	NA	NA	NA	NA	NA	NA	-0.0471652	NA	NA	NA	NA	NA	NA	NA	NA	NA	NA	NA	NA	NA	NA	NA	NA	NA	NA	NA	1	0	1	1
chr6:133984671-133986960	TBPL1	NA	NA	NA	NA	NA	NA	NA	0.637486	NA	NA	NA	NA	NA	-0.00576974	NA	NA	NA	NA	NA	NA	NA	NA	NA	NA	NA	NA	NA	NA	NA	NA	NA	NA	NA	1	0	1	2
chr20:41166859-41167851	PLCG1	0.752412	-0.00301419	-0.271088	0.586054	0.65922	0.231253	-0.506011	0.395758	-0.594445	-0.309312	-0.434571	0.0002577	-0.448645	-0.0329145	0.830047	NA	0.227002	-0.516807	-0.555153	0.161336	-0.0593922	0.135748	0.0965592	0.485876	-0.241661	-0.707466	0.312611	-0.191683	0.594426	0.290154	0.872787	-0.884952	-0.755204	2	1	3	32
chr17:43074521-43076487	BRCA1	NA	NA	NA	NA	NA	NA	NA	NA	NA	NA	NA	NA	NA	-0.0354742	NA	NA	NA	NA	NA	NA	NA	NA	NA	NA	NA	NA	NA	NA	NA	NA	NA	NA	NA	1	0	1	1
chr17:4893067-4893433	MINK1	0.262929	-0.017301	-0.0117585	0.165474	-0.273248	0.0902039	0.468742	0.527843	0.562644	0.144472	-0.507179	0.00063891	-0.283832	-0.0246925	0.437872	NA	-0.426927	-0.668208	0.657013	-0.292311	-0.226687	0.661078	0.0956353	0.712897	NA	-0.352946	-0.736419	-0.399703	0.430707	-0.604157	NA	NA	NA	3	1	4	28
chr12:49100454-49100555	LMBR1L	NA	0.439923	-0.459915	0.322494	-0.358283	0.369948	-0.554518	0.598858	-0.362692	NA	NA	0.29612	-0.817633	-0.505261	0.00644566	NA	-0.201952	-0.162695	-0.190841	0.754236	0.245198	-0.669566	0.249431	-0.2605	-0.861002	-0.658778	-0.823442	0.839998	NA	-0.0472547	NA	-0.190787	NA	1	1	2	26
chr3:42632823-42633579	NKTR	NA	-0.146714	-0.496501	-0.826704	NA	NA	NA	0.319693	0.292467	NA	-0.912687	0.00139445	0.681964	-0.132041	0.154341	NA	-0.190124	-0.438047	-0.145989	-0.10421	-0.47072	NA	0.136882	NA	NA	-0.869838	0.00157536	0.20791	0.0329195	NA	NA	NA	NA	0	3	3	20
chr2:200820120-200821182	BZW1	NA	NA	NA	NA	NA	NA	NA	NA	NA	NA	NA	NA	NA	-0.0322446	NA	NA	NA	NA	NA	NA	NA	NA	NA	NA	NA	NA	NA	NA	NA	NA	NA	NA	NA	1	0	1	1
chr7:67195337-67238307	TYW1	NA	NA	NA	NA	NA	NA	NA	NA	NA	NA	NA	NA	NA	-0.0350754	NA	NA	NA	NA	NA	NA	NA	NA	NA	NA	NA	NA	NA	NA	NA	NA	NA	NA	NA	1	0	1	1
chr11:114064568-114156336	ZBTB16	NA	NA	NA	NA	NA	NA	NA	NA	NA	NA	NA	NA	NA	-0.0367075	NA	NA	NA	NA	NA	NA	NA	NA	NA	NA	NA	NA	NA	NA	NA	NA	NA	NA	NA	1	0	1	1
chr5:87379850-87380508	RASA1	0.192992	NA	-0.438082	NA	0.628634	NA	-0.155209	0.454057	-0.513457	NA	NA	0.0141033	0.123194	-0.00012699	-0.0643462	NA	-0.0301078	NA	NA	NA	0.37975	-0.840452	0.203527	NA	NA	-0.845589	-0.398051	NA	0.234462	0.264861	NA	NA	-0.153584	2	1	3	19
chr19:10547115-10547188	ATG4D	0.219966	-0.159813	-0.214094	-0.497576	-0.378479	0.681952	-0.2562	0.325302	-0.094358	-0.0144228	NA	0.0239549	0.0180263	-0.942063	0.0121757	0.361077	-0.276188	-0.100986	-0.0784713	-0.239215	-0.127488	-0.9507	0.253146	-0.244381	-0.56727	0.129282	0.273334	0.285095	0.160315	-0.053642	0.833626	-0.135469	-0.689791	1	3	4	32
chr19:11405231-11405322	RGL3	NA	NA	NA	NA	NA	NA	NA	NA	NA	NA	NA	-0.188167	NA	NA	NA	NA	NA	NA	NA	NA	NA	NA	NA	NA	NA	NA	NA	NA	NA	NA	-0.0330467	NA	NA	1	0	1	2
chr16:1786955-1787676	NUBP2	-0.39332	-0.00137675	NA	NA	-0.858402	NA	NA	0.526971	0.269679	NA	NA	NA	-0.358688	-0.190726	0.424173	NA	0.294915	NA	NA	NA	-0.0537066	-0.197329	NA	NA	NA	0.078583	NA	-0.0548724	NA	-0.550993	-0.666178	NA	NA	1	0	1	15
chr12:50671398-50674473	DIP2B	NA	NA	NA	NA	NA	NA	NA	NA	NA	NA	NA	NA	NA	-0.00142582	NA	NA	NA	NA	NA	NA	NA	NA	NA	NA	NA	NA	NA	NA	NA	NA	NA	NA	NA	1	0	1	1
chr9:32457418-32459370	DDX58	NA	NA	NA	NA	NA	NA	NA	0.537697	NA	NA	NA	NA	NA	-0.00753537	NA	NA	NA	NA	NA	NA	NA	NA	NA	NA	NA	NA	NA	NA	NA	NA	NA	NA	NA	1	0	1	2
chr9:136992700-136992924	PAXX	0.00349473	-0.0526881	-0.366395	-0.161082	0.453912	0.495289	-0.323298	0.214545	-0.42544	-0.169729	0.0304472	0.0066246	0.405471	-0.168193	0.389889	0.250194	-0.100368	0.108055	0.00125504	0.536592	-0.0635028	-0.356738	0.0003346	-0.125092	0.00260768	0.208436	-0.606264	0.517076	0.181778	-0.203784	0.077478	-0.669569	0.31288	0	6	6	33
chr2:37068930-37070229	HEATR5B	NA	NA	NA	NA	NA	NA	NA	NA	NA	NA	NA	NA	NA	-0.0350705	NA	NA	NA	NA	NA	NA	NA	NA	NA	NA	NA	NA	NA	NA	NA	NA	NA	NA	NA	1	0	1	1
chr6:83179967-83181735	PGM3	NA	NA	NA	NA	NA	NA	NA	NA	NA	NA	NA	NA	NA	-0.0231775	NA	NA	NA	NA	NA	NA	NA	NA	NA	NA	NA	NA	NA	NA	NA	NA	NA	NA	NA	1	0	1	1
chr1:1489274-1490256	ATAD3B	-0.446776	-0.00083145	-0.181933	-0.39269	0.273961	0.402505	0.0748348	-0.0003833	0.20817	-0.0111513	-0.236519	0.712893	-0.294524	-0.16674	-0.251348	-0.00472864	0.206009	-0.0241269	-0.278523	-0.332997	-0.147855	-0.998921	0.0854581	0.0624482	-0.0397376	0.618478	0.403962	-0.163735	0.680248	-0.599156	-0.170116	-0.306903	-0.117506	6	0	6	33
chr6:89662967-89664486	MDN1	NA	NA	NA	NA	NA	NA	NA	NA	NA	NA	NA	NA	NA	-0.0106768	NA	NA	NA	NA	NA	NA	NA	NA	NA	NA	NA	NA	NA	NA	NA	NA	NA	NA	NA	1	0	1	1
chr12:51118772-51172300	TFCP2	NA	NA	NA	NA	NA	NA	NA	0.41286	NA	NA	NA	NA	NA	-0.0286408	NA	NA	NA	NA	NA	NA	NA	NA	NA	NA	NA	NA	0.535901	NA	NA	NA	NA	NA	NA	1	0	1	3
chr15:70064470-70066013	TLE3	NA	NA	NA	NA	NA	NA	NA	NA	NA	NA	NA	NA	NA	-0.0475764	NA	NA	NA	NA	NA	NA	NA	NA	NA	NA	NA	NA	NA	NA	NA	NA	NA	NA	NA	1	0	1	1
chr17:30492753-30510879	GOSR1	NA	NA	NA	NA	NA	NA	NA	NA	NA	NA	NA	NA	NA	-0.0384875	NA	NA	NA	NA	NA	NA	NA	NA	NA	NA	NA	NA	NA	NA	NA	NA	NA	NA	NA	1	0	1	1
chr1:51445045-51446959	EPS15	NA	NA	NA	NA	NA	NA	NA	NA	NA	NA	NA	NA	NA	-0.00423635	NA	NA	NA	NA	NA	NA	NA	NA	NA	NA	NA	NA	NA	NA	NA	NA	NA	NA	NA	1	0	1	1
chr20:2975241-2986764	PTPRA	NA	NA	NA	NA	NA	NA	NA	NA	NA	NA	NA	NA	NA	-0.00140752	NA	NA	NA	NA	NA	NA	NA	NA	NA	NA	NA	NA	NA	NA	NA	NA	NA	NA	NA	1	0	1	1
chr1:10132482-10134987	UBE4B	NA	NA	NA	NA	NA	NA	NA	NA	NA	NA	NA	NA	NA	-0.0236089	NA	NA	NA	NA	NA	NA	NA	NA	NA	NA	NA	NA	NA	NA	NA	NA	NA	NA	NA	1	0	1	1
chr8:21990919-21991867	XPO7	NA	NA	NA	NA	NA	NA	NA	NA	NA	NA	NA	NA	NA	-0.0496449	NA	NA	NA	NA	NA	NA	NA	NA	NA	NA	NA	NA	NA	NA	NA	NA	NA	NA	NA	1	0	1	1
chr4:1953524-1955160	NSD2	NA	NA	NA	NA	NA	NA	NA	NA	NA	NA	NA	NA	NA	-0.00839276	NA	NA	NA	NA	NA	NA	NA	NA	NA	NA	NA	NA	NA	NA	NA	NA	NA	NA	NA	1	0	1	1
chrX:15791013-15799871	ZRSR2	NA	NA	NA	NA	NA	NA	NA	NA	NA	NA	NA	NA	NA	-0.0197011	NA	NA	NA	NA	NA	NA	NA	NA	NA	NA	NA	NA	NA	NA	NA	NA	NA	NA	NA	1	0	1	1
chr4:48831249-48832619	OCIAD1	NA	NA	NA	NA	NA	NA	NA	NA	NA	NA	NA	NA	-0.831776	-0.0443001	NA	NA	NA	NA	NA	NA	NA	NA	NA	NA	NA	NA	NA	NA	NA	NA	NA	NA	NA	1	0	1	2
chr6:13634552-13637807	RANBP9	NA	NA	NA	NA	NA	NA	NA	NA	NA	NA	NA	NA	NA	-0.0110199	NA	NA	NA	NA	NA	NA	NA	NA	NA	NA	NA	NA	NA	NA	NA	NA	NA	NA	NA	1	0	1	1
chr9:137214068-137214203	NDOR1	NA	NA	NA	-0.786011	NA	NA	NA	0.0719825	0.830818	NA	NA	NA	NA	0.657959	0.255172	NA	-0.350878	-0.0278662	NA	0.826576	NA	NA	NA	NA	NA	-0.164457	-0.116337	0.213687	NA	NA	NA	NA	NA	1	0	1	11
chr1:173938874-173941264	RC3H1	NA	NA	NA	NA	NA	NA	NA	NA	NA	NA	NA	NA	NA	-0.0211479	NA	NA	NA	NA	NA	NA	NA	NA	NA	NA	NA	NA	NA	NA	NA	NA	NA	NA	NA	1	0	1	1
chr16:48362430-48385203	SIAH1	NA	NA	NA	NA	NA	NA	NA	NA	NA	NA	NA	NA	NA	-0.0391972	NA	NA	NA	NA	NA	NA	NA	NA	NA	NA	NA	NA	NA	NA	NA	NA	NA	NA	NA	1	0	1	1
chr2:31943383-32010186	MEMO1	NA	NA	NA	NA	NA	NA	NA	NA	NA	NA	NA	NA	NA	-0.0487726	NA	NA	NA	NA	NA	NA	NA	NA	NA	NA	NA	NA	NA	NA	NA	NA	NA	NA	NA	1	0	1	1
chr9:87697204-87698655	DAPK1	NA	NA	NA	NA	NA	NA	NA	NA	NA	NA	NA	0.0181024	0.0522435	-0.0604928	NA	NA	NA	NA	NA	NA	NA	NA	NA	NA	NA	NA	NA	NA	NA	NA	NA	NA	NA	0	1	1	3
chr6:109445529-109445770	MICAL1	NA	NA	NA	NA	NA	NA	NA	-0.0335884	NA	NA	NA	NA	NA	-0.0190116	NA	NA	NA	NA	NA	NA	NA	NA	NA	NA	NA	NA	NA	NA	NA	NA	NA	NA	NA	2	0	2	2
chr9:35102823-35103049	STOML2	NA	NA	NA	NA	NA	NA	NA	NA	NA	NA	-0.257155	NA	-0.192952	-0.269869	-0.340863	NA	-0.0138402	NA	NA	NA	-0.135845	0.889208	NA	NA	NA	NA	0.217826	-0.750412	NA	NA	NA	NA	NA	1	0	1	9
chr17:45233731-45234071	FMNL1	NA	NA	NA	NA	NA	NA	-0.263399	-0.316664	NA	NA	NA	0.0656892	NA	-0.206559	NA	NA	-0.0908235	NA	NA	-0.026681	NA	NA	NA	NA	NA	NA	0.422215	NA	NA	0.567442	NA	NA	NA	1	0	1	8
chr14:24175624-24176821	REC8	NA	NA	NA	NA	NA	NA	NA	NA	NA	NA	NA	NA	NA	-0.00272757	NA	NA	NA	NA	NA	NA	NA	NA	NA	NA	NA	NA	NA	NA	NA	NA	NA	NA	NA	1	0	1	1
chr9:129900547-129902868	FNBP1	NA	NA	NA	NA	NA	NA	NA	NA	NA	NA	NA	NA	NA	-0.00806455	NA	NA	NA	NA	NA	NA	NA	NA	NA	NA	NA	NA	NA	NA	NA	NA	NA	NA	NA	1	0	1	1
chr1:225846932-225847033	TMEM63A	NA	NA	NA	NA	NA	NA	NA	NA	NA	NA	NA	NA	NA	-0.0260427	NA	NA	NA	NA	NA	NA	NA	NA	NA	NA	NA	NA	NA	NA	NA	NA	NA	NA	NA	1	0	1	1
chr22:17791301-17803810	MICAL3	NA	NA	NA	NA	NA	NA	NA	NA	NA	NA	NA	0.0398954	NA	NA	NA	NA	NA	NA	NA	NA	NA	NA	NA	NA	NA	NA	NA	NA	NA	NA	NA	NA	NA	0	1	1	1
chr14:103727914-103728907	ZFYVE21	NA	NA	NA	NA	NA	NA	NA	NA	NA	NA	NA	NA	NA	-0.00067117	NA	NA	NA	NA	NA	NA	NA	NA	NA	NA	NA	NA	NA	NA	NA	NA	NA	NA	NA	1	0	1	1
chr16:24555917-24556307	RBBP6	NA	NA	NA	NA	NA	NA	NA	NA	NA	NA	NA	NA	NA	-0.0316514	NA	NA	NA	NA	NA	NA	NA	NA	NA	NA	NA	NA	NA	NA	NA	NA	NA	NA	NA	1	0	1	1
chr1:231818517-231958827	DISC1	NA	NA	NA	NA	NA	NA	NA	NA	NA	NA	NA	NA	NA	-0.0148284	NA	NA	NA	NA	NA	NA	NA	NA	NA	NA	NA	NA	NA	NA	NA	NA	NA	NA	NA	1	0	1	1
chr16:2856848-2858022	PRSS22	NA	-0.00041842	-0.16186	0.0973026	0.113965	0.778282	NA	-0.460578	NA	0.0590201	NA	NA	NA	NA	NA	NA	-0.0536335	-0.861108	NA	0.0359979	-0.301936	NA	0.0830908	0.930975	NA	NA	-0.418945	NA	0.311968	NA	-0.522484	NA	NA	1	1	2	16
chr17:40630924-40631591	SMARCE1	NA	NA	NA	NA	NA	NA	NA	NA	NA	NA	NA	NA	NA	-0.0449188	NA	NA	NA	NA	NA	NA	NA	NA	NA	NA	NA	NA	NA	NA	NA	NA	NA	NA	NA	1	0	1	1
chr1:17632466-17634547	ARHGEF10L	NA	NA	NA	NA	0.187481	NA	NA	NA	NA	NA	NA	0.0137357	NA	NA	NA	-0.799867	NA	NA	NA	NA	NA	NA	NA	NA	NA	NA	-0.0708167	NA	NA	NA	NA	NA	NA	0	1	1	4
chr2:10777722-10778571	ATP6V1C2	NA	NA	NA	NA	NA	NA	NA	-0.0168075	NA	NA	-0.111168	NA	NA	NA	NA	NA	NA	NA	NA	NA	NA	NA	NA	NA	NA	NA	NA	NA	NA	NA	NA	NA	NA	1	0	1	2
chr11:6478198-6478737	ARFIP2	-0.167054	-0.5164	-0.082378	0.263246	0.353626	0.0192461	0.543076	-0.583456	NA	NA	-0.0832694	0.00061884	0.194873	NA	NA	-0.524651	-0.158846	-0.324077	-0.809221	NA	-0.204322	-0.308256	NA	0.210574	-0.220183	-0.109029	-0.11975	-0.608404	NA	-0.647593	0.0482126	-0.660782	NA	0	3	3	25
chr1:209762870-209763067	TRAF3IP3	NA	NA	NA	NA	NA	NA	NA	NA	NA	NA	NA	NA	NA	-0.00048371	NA	NA	NA	NA	NA	NA	NA	NA	NA	NA	NA	NA	NA	NA	NA	NA	NA	NA	NA	1	0	1	1
chr18:10530837-10532710	NAPG	NA	NA	NA	NA	NA	NA	NA	NA	NA	NA	NA	NA	NA	-0.00309574	NA	NA	NA	NA	NA	NA	NA	NA	NA	NA	NA	NA	NA	NA	NA	NA	NA	NA	NA	1	0	1	1
chr6:136282687-136289712	BCLAF1	NA	NA	NA	NA	NA	NA	NA	NA	NA	NA	NA	NA	NA	-0.0245254	NA	NA	NA	NA	NA	NA	NA	NA	NA	NA	NA	NA	NA	NA	NA	NA	NA	NA	NA	1	0	1	1
chr1:36089115-36091243	ADPRS	NA	-0.701857	0.35786	0.24503	-0.221283	NA	NA	0.0420825	-0.473325	NA	NA	0.138632	-0.21684	-0.00022208	-0.192388	NA	-0.0159722	-0.220682	NA	-0.357042	-0.0916953	NA	NA	NA	NA	NA	-0.230175	NA	NA	NA	NA	NA	NA	2	1	3	15
chr9:137431341-137433028	NOXA1	NA	NA	NA	-0.100272	-0.0404147	-0.298281	NA	0.548509	0.0913204	NA	0.185789	NA	0.0597591	NA	0.363645	NA	0.49368	NA	NA	0.805533	-0.829895	0.641852	0.107554	-0.481543	NA	NA	-0.585721	NA	NA	0.245808	0.0859952	NA	NA	1	0	1	17
chr10:74124524-74126147	AP3M1	NA	NA	NA	NA	NA	NA	NA	NA	NA	NA	NA	NA	NA	-0.0351554	NA	NA	NA	NA	NA	NA	NA	NA	NA	NA	NA	NA	NA	NA	NA	NA	NA	NA	NA	1	0	1	1
chr9:33927992-33932561	UBAP2	NA	NA	NA	NA	NA	NA	NA	NA	NA	NA	NA	NA	NA	-0.0404282	NA	NA	NA	NA	NA	NA	NA	NA	NA	NA	NA	NA	NA	NA	NA	NA	NA	NA	NA	1	0	1	1
chr17:82056974-82057052	GPS1	NA	NA	NA	NA	NA	NA	NA	NA	NA	NA	NA	NA	NA	-0.021437	NA	NA	NA	NA	NA	NA	NA	NA	NA	NA	NA	NA	NA	NA	NA	NA	NA	NA	NA	1	0	1	1
chr2:27507311-27507680	GCKR	NA	NA	NA	NA	0.158546	NA	NA	NA	NA	NA	NA	NA	NA	NA	NA	0.0220098	NA	NA	NA	NA	NA	NA	NA	NA	NA	NA	NA	NA	NA	NA	NA	NA	NA	0	1	1	2
chr17:75917850-75917930	FBF1	NA	NA	NA	NA	NA	NA	NA	0.00821036	NA	NA	NA	NA	NA	NA	NA	NA	NA	0.610308	NA	NA	NA	NA	NA	NA	NA	NA	-0.0198235	NA	NA	NA	NA	NA	NA	1	1	2	3
chr17:16431850-16431965	TRPV2	NA	NA	NA	NA	NA	NA	NA	NA	NA	NA	NA	NA	NA	-0.00899591	NA	NA	NA	NA	NA	NA	NA	NA	NA	NA	NA	NA	NA	NA	NA	NA	NA	NA	NA	1	0	1	1
chr14:24177383-24177464	REC8	NA	0.250386	NA	0.222513	0.973313	NA	-0.24203	-0.0661134	0.111893	NA	NA	0.179968	NA	-0.648335	0.225747	NA	-0.464286	0.852039	0.172889	0.85273	0.00605763	-0.136773	NA	NA	NA	NA	-0.221931	-0.029436	NA	0.325069	0.662724	-0.0122713	NA	2	1	3	20
chr14:105445511-105449358	MTA1	0.183515	-0.244734	-0.626162	0.954531	-0.556912	NA	0.139988	NA	-0.798076	NA	-0.255988	0.0393607	-0.12683	-0.0144685	0.131794	NA	-0.541723	-0.115692	-0.327604	NA	-0.0923033	0.998678	0.00710158	NA	-0.289517	-0.766326	NA	-0.962944	0.0412122	-0.266664	NA	-0.0164824	-0.294552	2	3	5	25
chr12:122137590-122138193	MLXIP	0.524065	NA	NA	NA	NA	NA	NA	0.65711	NA	NA	NA	0.257044	NA	-0.19758	NA	NA	NA	NA	NA	-0.0299768	-0.493682	NA	NA	NA	NA	NA	0.403075	NA	NA	NA	NA	NA	NA	1	0	1	7
chr17:81824554-81833237	MCRIP1	NA	NA	NA	NA	NA	NA	NA	NA	NA	NA	NA	NA	NA	-0.0335181	NA	NA	NA	NA	NA	NA	NA	NA	NA	NA	NA	NA	NA	NA	NA	NA	NA	NA	NA	1	0	1	1
chr19:21809807-21817887	ZNF43	NA	NA	NA	NA	NA	NA	NA	NA	NA	NA	NA	NA	NA	-0.0289493	NA	NA	NA	NA	NA	NA	NA	NA	NA	NA	NA	NA	NA	NA	NA	NA	NA	NA	NA	1	0	1	1
chr6:30561508-30561833	PRR3	NA	0.342122	0.391395	0.655329	0.463096	NA	NA	0.132338	0.176707	NA	NA	1.34e-05	NA	0.799817	0.00267267	NA	-0.0707825	-0.0031065	0.351938	-0.513697	-0.323098	0.861725	0.134551	NA	-0.563968	0.221846	-0.621471	-0.247227	0.186342	0.452767	NA	0.39611	-0.413046	1	2	3	24
chr3:52414048-52414495	PHF7	NA	NA	NA	NA	NA	NA	NA	-0.439022	-0.270126	NA	-0.726377	NA	0.333724	-0.091419	-0.576741	NA	NA	NA	NA	-0.0429373	NA	NA	NA	NA	NA	NA	0.360531	NA	NA	NA	NA	NA	NA	1	0	1	8
chr15:90894058-90895415	FES	NA	NA	NA	NA	NA	NA	NA	NA	NA	NA	NA	NA	NA	-0.00536249	NA	NA	NA	NA	NA	NA	NA	NA	NA	NA	NA	NA	NA	NA	NA	NA	NA	NA	NA	1	0	1	1
chr12:53505262-53505648	TARBP2	NA	NA	NA	NA	NA	NA	NA	NA	NA	NA	NA	NA	NA	-0.0239555	NA	NA	NA	NA	NA	NA	NA	NA	NA	NA	NA	NA	NA	NA	NA	NA	NA	NA	NA	1	0	1	1
chrX:65533735-65534479	LAS1L	NA	NA	NA	NA	NA	NA	NA	NA	NA	NA	NA	NA	NA	-0.0395387	NA	NA	NA	NA	NA	NA	NA	NA	NA	NA	NA	NA	NA	NA	NA	NA	NA	NA	NA	1	0	1	1
chr12:106967180-106971104	TMEM263	NA	NA	NA	NA	NA	NA	NA	0.0260618	NA	NA	NA	NA	NA	-0.0854018	NA	NA	NA	NA	NA	NA	NA	NA	NA	NA	NA	NA	NA	NA	NA	NA	NA	NA	NA	0	1	1	2
chr17:63685578-63688526	MAP3K3	NA	NA	NA	NA	NA	NA	NA	0.329688	NA	NA	NA	NA	NA	-0.0361543	NA	NA	NA	NA	NA	-0.0279343	NA	NA	NA	NA	NA	-0.536574	NA	NA	NA	NA	NA	NA	NA	2	0	2	4
chr3:52527375-52527616	NT5DC2	0.425018	-0.0867971	NA	NA	NA	0.017285	-0.434992	NA	NA	NA	NA	0.0720298	0.66358	-0.0792765	NA	NA	NA	NA	NA	NA	-0.0854245	0.772411	NA	NA	NA	NA	NA	-0.584539	NA	NA	NA	NA	NA	0	1	1	10
chr11:11938372-11940428	USP47	NA	NA	NA	NA	NA	NA	NA	NA	NA	NA	NA	NA	NA	-0.0017705	NA	NA	NA	NA	NA	NA	NA	NA	NA	NA	NA	NA	NA	NA	NA	NA	NA	NA	NA	1	0	1	1
chr16:5027198-5027277	NAGPA	-0.149357	-0.497426	0.150484	-0.801401	-0.113692	0.213772	0.554921	0.320905	-0.546807	-0.910898	-0.650749	0.166991	-0.584381	-0.310447	0.378989	0.21356	-0.337354	0.385579	0.445016	-0.724752	-0.360836	0.850694	0.175594	-0.447344	0.26319	-0.331405	0.160976	-0.00865073	-0.503358	-0.200475	NA	0.113499	0.346393	1	0	1	32
chr1:12022917-12029032	MIIP	NA	NA	NA	NA	NA	NA	NA	NA	NA	NA	NA	NA	NA	-0.0187256	NA	NA	NA	NA	NA	NA	NA	NA	NA	NA	NA	NA	NA	NA	NA	NA	NA	NA	NA	1	0	1	1
chr8:89943366-89946139	NBN	NA	NA	NA	NA	NA	NA	NA	NA	NA	NA	NA	NA	NA	-0.0267284	NA	NA	NA	NA	NA	NA	NA	NA	NA	NA	NA	NA	NA	NA	NA	NA	NA	NA	NA	1	0	1	1
chr19:41896482-41897314	ARHGEF1	NA	-0.00215364	-0.00957217	-0.230174	-0.485326	NA	0.063812	-0.705017	0.693177	NA	NA	0.00022993	0.327394	0.855203	-0.00400798	NA	-0.145946	-0.580712	-0.819623	-0.540109	-0.401046	NA	0.0419366	NA	-0.0714195	0.261894	0.269104	-0.0990612	-0.333557	-0.556561	NA	NA	NA	3	2	5	23
chr11:65978914-65979011	SART1	NA	NA	NA	NA	NA	NA	NA	NA	NA	NA	NA	NA	NA	-0.0311085	NA	NA	NA	NA	NA	NA	NA	NA	NA	NA	NA	NA	NA	NA	NA	NA	NA	NA	NA	1	0	1	1
chr9:32466441-32467761	DDX58	NA	NA	NA	NA	NA	NA	NA	NA	NA	NA	NA	NA	NA	-0.00028648	NA	NA	NA	NA	NA	NA	NA	NA	NA	NA	NA	NA	NA	NA	NA	NA	NA	NA	NA	1	0	1	1
chr19:48796718-48796936	BCAT2	NA	NA	NA	NA	NA	NA	NA	NA	NA	NA	NA	NA	NA	-0.0311164	NA	NA	NA	NA	NA	NA	NA	NA	NA	NA	NA	NA	NA	NA	NA	NA	NA	NA	NA	1	0	1	1
chr7:30436081-30437572	NOD1	NA	NA	NA	NA	NA	NA	NA	0.282595	NA	NA	NA	NA	NA	-0.0415407	NA	NA	NA	NA	NA	NA	NA	NA	NA	NA	NA	NA	0.197483	NA	NA	NA	NA	NA	NA	1	0	1	3
chr6:32934987-32935535	HLA-DMB	0.473636	-0.0854336	NA	NA	0.376739	NA	0.138842	NA	NA	NA	NA	0.00443382	0.436935	NA	NA	NA	NA	-0.626266	NA	NA	-0.143311	NA	NA	NA	NA	NA	NA	-0.0796444	NA	-0.352735	NA	-0.378185	NA	0	1	1	11
chr12:112152140-112152426	TRAFD1	0.459961	-0.0431887	NA	0.752162	-0.222185	0.400388	NA	0.367492	NA	NA	NA	0.0161539	-0.370948	-0.0557655	NA	NA	0.450437	-0.789926	NA	0.848497	-0.37276	0.999406	NA	NA	NA	NA	0.547356	NA	-0.342758	0.311641	NA	-0.239019	NA	1	1	2	18
chr2:85600018-85600344	TMEM150A	NA	NA	NA	NA	NA	NA	NA	NA	NA	NA	NA	0.268271	NA	NA	NA	NA	-0.0162407	NA	NA	NA	NA	NA	NA	NA	NA	NA	NA	NA	NA	NA	NA	NA	NA	1	0	1	2
chr12:57600437-57600810	PIP4K2C	NA	-0.50485	-0.0650649	0.272421	0.169049	NA	NA	0.539199	0.695819	NA	NA	NA	0.567068	-0.663147	NA	NA	-0.255692	-0.0196571	NA	0.804282	0.92471	NA	NA	NA	NA	NA	0.0173567	-0.41577	NA	NA	NA	NA	NA	1	1	2	14
chr12:26999676-27003235	TM7SF3	NA	NA	NA	NA	NA	NA	NA	NA	NA	NA	NA	NA	NA	-0.00974891	NA	NA	NA	NA	NA	NA	NA	NA	NA	NA	NA	NA	NA	NA	NA	NA	NA	NA	NA	1	0	1	1
chr21:46302154-46302484	C21orf58	NA	NA	NA	-0.690251	NA	NA	0.429429	0.00629516	NA	NA	NA	NA	NA	-0.82699	NA	NA	NA	NA	NA	-0.0809451	NA	NA	NA	NA	NA	NA	NA	NA	NA	-0.658875	NA	-0.236031	NA	0	1	1	7
chr11:64564428-64565221	SLC22A11	NA	NA	NA	NA	NA	NA	NA	NA	NA	NA	NA	4.7e-05	-0.267069	NA	NA	NA	NA	NA	NA	NA	NA	NA	NA	NA	NA	NA	NA	NA	NA	NA	NA	NA	NA	0	1	1	2
chr5:876212-878354	BRD9	NA	NA	NA	NA	NA	NA	NA	NA	NA	NA	NA	NA	NA	-0.0456546	NA	NA	NA	NA	NA	NA	NA	NA	NA	NA	NA	NA	NA	NA	NA	NA	NA	NA	NA	1	0	1	1
chr22:37629526-37629997	GGA1	NA	NA	NA	NA	NA	NA	NA	NA	NA	NA	NA	NA	NA	-0.026307	NA	NA	NA	NA	NA	NA	NA	NA	NA	NA	NA	NA	NA	NA	NA	NA	NA	NA	NA	1	0	1	1
chr2:223899070-223901182	WDFY1	NA	-0.310158	-0.604868	0.0608179	NA	0.125377	NA	-0.314675	0.0388149	0.147387	NA	0.00024404	NA	-0.785518	NA	NA	0.1463	-0.0878246	0.21437	-0.00151474	-0.293306	NA	NA	0.237864	NA	-0.368594	0.885233	0.339541	NA	NA	NA	NA	0.0532107	1	2	3	19
chr17:63822168-63823816	FTSJ3	NA	-0.446046	NA	NA	NA	NA	NA	0.165872	-0.300893	NA	NA	0.0181207	-0.239646	-0.0767302	NA	NA	-0.478359	NA	NA	NA	0.253424	NA	NA	NA	NA	NA	NA	NA	-0.199354	NA	NA	0.540372	NA	0	1	1	10
chr9:114351021-114355924	AKNA	NA	NA	NA	NA	NA	NA	NA	NA	NA	NA	NA	NA	NA	-0.0205552	NA	NA	NA	NA	NA	NA	NA	NA	NA	NA	NA	NA	NA	NA	NA	NA	NA	NA	NA	1	0	1	1
chr10:119582223-119582458	TIAL1	NA	NA	NA	NA	NA	NA	NA	NA	NA	NA	NA	NA	NA	-0.0424153	NA	NA	NA	NA	NA	NA	NA	NA	NA	NA	NA	NA	NA	NA	NA	NA	NA	NA	NA	1	0	1	1
chr19:49857130-49857692	PTOV1	0.0221575	-0.00106023	-0.00047597	-0.0959474	0.757348	0.399344	0.218441	-0.209597	0.713015	-0.00886231	NA	0.0010987	0.543447	0.532122	NA	0.629628	0.158582	-0.699512	0.489434	-0.131583	-0.285844	-0.354322	0.00312149	-0.161102	0.326203	0.0990615	-0.315604	-0.425914	0.186035	-0.527716	-0.419154	0.0513477	NA	3	3	6	30
chr8:102288266-102289452	UBR5	NA	NA	NA	NA	NA	NA	NA	NA	NA	NA	NA	NA	NA	-0.0188647	NA	NA	NA	NA	NA	NA	NA	NA	NA	NA	NA	NA	NA	NA	NA	NA	NA	NA	NA	1	0	1	1
chr18:23914561-23914697	LAMA3	NA	NA	NA	NA	NA	NA	NA	NA	NA	NA	NA	NA	NA	NA	NA	NA	NA	NA	NA	NA	NA	NA	NA	NA	NA	NA	-0.0179486	NA	NA	NA	NA	NA	NA	1	0	1	1
chr20:21348430-21349388	XRN2	NA	NA	NA	NA	NA	NA	NA	NA	NA	NA	NA	NA	NA	-0.033978	NA	NA	NA	NA	NA	NA	NA	NA	NA	NA	NA	NA	NA	NA	NA	NA	NA	NA	NA	1	0	1	1
chr3:194412288-194413758	ATP13A3	NA	NA	NA	NA	NA	NA	NA	NA	NA	NA	NA	0.129877	NA	-0.00364853	NA	NA	NA	NA	NA	NA	NA	NA	NA	NA	NA	NA	NA	NA	NA	NA	NA	NA	NA	1	0	1	2
chr3:14168380-14170437	XPC	NA	NA	NA	NA	NA	NA	NA	NA	NA	NA	NA	NA	NA	-0.0221971	NA	NA	NA	NA	NA	NA	NA	NA	NA	NA	NA	NA	NA	NA	NA	NA	NA	NA	NA	1	0	1	1
chr15:42511903-42512954	SNAP23	NA	NA	NA	NA	NA	NA	NA	NA	NA	NA	NA	NA	NA	-0.00925834	NA	NA	NA	NA	NA	NA	NA	NA	NA	NA	NA	NA	NA	NA	NA	NA	NA	NA	NA	1	0	1	1
chr19:8255879-8256235	CERS4	NA	NA	NA	NA	NA	NA	0.436946	-0.0477469	NA	NA	NA	0.0646703	-0.870099	-0.412602	0.177399	NA	NA	-0.0620504	NA	NA	NA	-0.499117	NA	NA	0.397615	NA	0.267789	0.455605	NA	-0.408455	NA	-0.0816445	NA	1	0	1	13
chr17:4185046-4189381	ANKFY1	NA	NA	NA	NA	NA	NA	NA	NA	NA	NA	NA	NA	NA	-0.0144632	NA	NA	NA	NA	NA	NA	NA	NA	NA	NA	NA	NA	NA	NA	NA	NA	NA	NA	NA	1	0	1	1
chr14:74676321-74676582	AREL1	NA	NA	NA	NA	NA	NA	NA	0.88545	NA	NA	NA	NA	NA	-0.0163932	NA	NA	NA	NA	NA	NA	NA	NA	NA	NA	NA	NA	NA	NA	NA	NA	NA	NA	NA	1	0	1	2
chr19:19630537-19633802	GMIP	NA	NA	NA	NA	NA	NA	NA	NA	NA	NA	NA	NA	NA	-0.00941317	NA	NA	NA	NA	NA	NA	NA	NA	NA	NA	NA	NA	NA	NA	NA	NA	NA	NA	NA	1	0	1	1
chr12:105177016-105177225	APPL2	0.347017	NA	-0.448816	0.347569	-0.612525	0.241879	-0.44006	0.671197	NA	NA	0.697455	0.0445002	-0.0896503	-0.255215	NA	NA	0.359455	NA	NA	0.180064	0.641314	NA	NA	NA	0.686967	-0.478398	0.223096	NA	-0.505423	-0.690844	NA	NA	NA	0	1	1	19
chr19:16523290-16525241	CHERP	NA	NA	NA	NA	NA	NA	NA	NA	NA	NA	NA	NA	NA	-0.0318766	NA	NA	NA	NA	NA	NA	NA	NA	NA	NA	NA	NA	NA	NA	NA	NA	NA	NA	NA	1	0	1	1
chr17:7222865-7223132	ACADVL	0.186897	-0.00702615	-0.0706195	0.460047	0.480722	0.070792	0.28055	0.200024	0.504985	-0.264462	0.278838	0.00014781	0.0610401	-0.323673	-0.268623	0.0309705	-0.186396	-0.199949	-0.294918	0.814607	-0.0183201	0.277473	0.00141882	0.562538	0.217758	0.392758	0.32076	-0.554336	0.173838	0.588783	-0.46967	0.171691	0.18856	2	3	5	33
chr1:222564125-222569509	TAF1A	NA	NA	NA	NA	NA	NA	NA	0.0471326	NA	NA	NA	NA	NA	NA	NA	NA	NA	NA	NA	NA	NA	NA	NA	NA	NA	NA	NA	NA	NA	NA	NA	NA	NA	0	1	1	1
chr3:129268040-129268494	COPG1	NA	NA	NA	NA	NA	NA	NA	NA	NA	NA	NA	NA	NA	-0.00018444	NA	NA	NA	NA	NA	NA	NA	NA	NA	NA	NA	NA	NA	NA	NA	NA	NA	NA	NA	1	0	1	1
chr9:89357565-89357998	SECISBP2	0.730109	-0.610827	-0.586439	-0.419536	-0.175239	NA	0.24866	-0.2289	-0.401246	NA	NA	0.00614251	-0.318149	-0.927459	0.312497	NA	-0.00672132	-0.0909402	0.024473	0.305072	0.0621785	NA	NA	NA	0.0325724	-0.0718003	0.214921	-0.97125	-0.188428	NA	NA	NA	NA	1	3	4	22
chr4:186197130-186197532	CYP4V2	-0.646518	NA	NA	NA	NA	NA	NA	NA	-0.201161	NA	NA	1.551e-05	-0.123913	NA	-0.00041845	NA	NA	NA	NA	NA	NA	0.999064	NA	NA	NA	NA	NA	NA	-0.539339	-0.108911	NA	NA	-0.242797	1	1	2	9
chr1:3494124-3494370	MEGF6	NA	NA	NA	0.342669	NA	NA	NA	0.205824	NA	NA	NA	NA	NA	-0.926387	NA	NA	NA	NA	0.0445957	-0.52925	-0.187034	NA	NA	NA	NA	NA	-0.197014	NA	NA	NA	NA	NA	NA	0	1	1	7
chr7:151134568-151138142	AGAP3	NA	-0.511047	-0.0186635	-0.461892	-0.279385	NA	NA	-0.289909	NA	NA	NA	-0.546203	NA	-0.0439151	NA	NA	-0.195944	-0.127631	NA	0.549489	0.377592	NA	NA	NA	NA	0.412101	0.293359	NA	NA	NA	NA	NA	NA	2	0	2	13
chr1:15427284-15428592	EFHD2	NA	NA	NA	NA	NA	NA	NA	NA	NA	NA	NA	NA	NA	-0.00027316	NA	NA	NA	NA	NA	NA	NA	NA	NA	NA	NA	NA	NA	NA	NA	NA	NA	NA	NA	1	0	1	1
chr9:113390676-113390797	ALAD	0.0380378	-0.0823998	-0.0953847	-0.433423	0.295543	0.642677	-0.331436	-0.471637	-0.615451	-0.308057	0.394335	4.23e-06	-0.521159	-0.0446871	-0.108175	0.572587	-0.600431	-0.474305	0.334992	-0.203726	-0.364829	0.253093	0.0284149	0.142583	0.184409	0.803087	-0.659714	-0.795122	0.385737	-0.0786249	0.478043	0.0722179	0.207803	1	3	4	33
chr6:169253896-169253989	THBS2	NA	NA	NA	NA	NA	NA	NA	-0.282722	NA	NA	NA	NA	NA	NA	NA	NA	NA	NA	NA	NA	NA	NA	NA	NA	-0.00117202	NA	-0.549138	NA	NA	NA	NA	NA	NA	1	0	1	3
chr17:78676169-78676994	CYTH1	NA	NA	0.102332	-0.367913	NA	NA	0.122948	-0.663604	NA	-0.0941039	-0.54143	NA	NA	NA	0.565852	0.381572	0.172353	-0.330033	NA	NA	-0.186072	0.999065	0.0303613	NA	NA	NA	-0.764475	NA	-0.540601	-0.287303	NA	NA	NA	0	1	1	16
chr12:43730702-43731704	PUS7L	NA	NA	NA	NA	NA	NA	NA	0.0645403	NA	NA	NA	NA	NA	-0.0406481	NA	NA	NA	NA	NA	NA	NA	NA	NA	NA	NA	NA	NA	NA	NA	NA	NA	NA	NA	1	0	1	2
chr3:12584981-12585121	RAF1	-0.617464	-0.136498	NA	-0.928219	0.362384	0.00062681	-0.483757	0.0676702	0.423945	NA	NA	0.00039371	0.758721	-0.0313329	NA	NA	-0.483893	NA	NA	-0.121616	-0.0126774	0.621956	NA	0.635029	NA	0.475362	0.102479	-0.645197	0.35711	-0.133713	0.511598	0.36781	-0.0882412	2	2	4	24
chr12:70346324-70353828	CNOT2	NA	NA	NA	NA	NA	NA	NA	NA	NA	NA	NA	NA	NA	-0.0476813	NA	NA	NA	NA	NA	NA	NA	NA	NA	NA	NA	NA	NA	NA	NA	NA	NA	NA	NA	1	0	1	1
chr4:962613-962771	DGKQ	NA	NA	NA	NA	NA	NA	NA	NA	NA	NA	NA	NA	NA	-0.00433206	NA	NA	NA	NA	NA	-0.0513939	NA	NA	NA	NA	NA	NA	NA	NA	NA	NA	NA	NA	NA	1	0	1	2
chr22:21611043-21621514	UBE2L3	NA	NA	NA	NA	NA	NA	NA	NA	NA	NA	NA	NA	NA	-0.00102677	NA	NA	NA	NA	NA	NA	NA	NA	NA	NA	NA	NA	NA	NA	NA	NA	NA	NA	NA	1	0	1	1
chr14:21468752-21474866	RAB2B	NA	NA	NA	NA	NA	NA	NA	0.194572	NA	NA	NA	0.00154553	NA	-0.00311374	NA	NA	NA	NA	NA	NA	NA	NA	0.373058	NA	NA	NA	-0.702338	NA	NA	NA	NA	NA	NA	1	1	2	5
chr15:41760529-41761738	MGA	NA	NA	NA	NA	NA	NA	NA	NA	NA	NA	NA	NA	NA	-0.0334796	NA	NA	NA	NA	NA	NA	NA	NA	NA	NA	NA	NA	NA	NA	NA	NA	NA	NA	NA	1	0	1	1
chr6:157174117-157174846	ARID1B	NA	NA	NA	NA	NA	NA	NA	NA	NA	NA	NA	NA	NA	-8.4e-05	NA	NA	NA	NA	NA	NA	NA	NA	NA	NA	NA	NA	NA	NA	NA	NA	NA	NA	NA	1	0	1	1
chr22:31099896-31104315	SMTN	NA	NA	NA	NA	NA	NA	NA	NA	NA	NA	NA	0.0436179	NA	NA	NA	NA	NA	NA	NA	NA	NA	NA	NA	NA	NA	NA	NA	NA	NA	NA	NA	NA	NA	0	1	1	1
chr11:134371492-134371751	GLB1L2	NA	NA	NA	NA	NA	NA	NA	NA	NA	NA	NA	NA	NA	NA	-0.045674	NA	NA	NA	NA	NA	NA	-0.329764	NA	NA	NA	NA	NA	NA	-0.276287	NA	NA	NA	NA	1	0	1	3
chr4:145144434-145146266	OTUD4	NA	NA	NA	NA	NA	NA	NA	0.154571	NA	NA	NA	NA	NA	-0.194756	NA	NA	NA	NA	NA	NA	NA	NA	NA	NA	NA	NA	-0.0265448	NA	NA	NA	NA	NA	NA	1	0	1	3
chr7:144377190-144378761	ARHGEF5	NA	-0.10825	-0.125062	NA	-0.605665	NA	NA	-0.932786	NA	NA	NA	0.432184	-0.0363319	NA	NA	NA	-0.496407	-0.624688	NA	0.417922	-0.787347	NA	0.60597	NA	NA	NA	-0.336397	NA	-0.286938	NA	NA	NA	NA	1	0	1	13
chr11:67285188-67285285	GRK2	NA	NA	NA	NA	NA	NA	NA	NA	NA	NA	NA	NA	NA	-0.0027648	NA	NA	NA	NA	NA	NA	NA	NA	NA	NA	NA	NA	NA	NA	NA	NA	NA	NA	NA	1	0	1	1
chr3:14445851-14447581	SLC6A6	NA	NA	NA	NA	NA	NA	NA	NA	NA	NA	NA	NA	NA	-0.0179503	NA	NA	NA	NA	NA	NA	NA	NA	NA	NA	NA	NA	NA	NA	NA	NA	NA	NA	NA	1	0	1	1
chr17:75521510-75521704	TSEN54	-0.71726	-0.071212	-0.00374595	0.745225	0.495024	0.00379993	-0.0593413	0.618009	-0.237762	-0.874445	-0.0323455	-0.056688	-0.0239399	-0.0491265	-0.0236663	-0.0892427	0.154562	0.240132	-0.0410868	0.101421	-0.215651	0.710797	-0.625581	-0.277332	-0.245901	-0.86661	-0.265728	-0.794525	-0.356082	0.23423	-0.00739343	-0.774397	-0.624809	7	1	8	33
chr12:53713900-53714132	CALCOCO1	0.419209	-0.0338619	-0.027816	-0.57715	0.68266	0.353479	-0.410149	-0.467134	0.220588	-0.463012	-0.388832	0.00057708	0.236959	-0.476523	0.426051	0.13064	0.214791	0.439231	0.0741849	0.217633	-0.501018	0.189419	0.0286014	-0.607812	0.126116	-0.526991	0.271757	-0.624572	0.219572	0.271347	0.271808	-0.402052	0.602279	2	2	4	33
chr14:92093318-92093745	ATXN3	NA	NA	NA	NA	NA	NA	NA	0.154507	NA	NA	NA	NA	NA	-0.0239788	NA	NA	NA	NA	NA	NA	NA	NA	NA	NA	NA	NA	NA	NA	NA	NA	NA	NA	NA	1	0	1	2
chr19:7647511-7647724	STXBP2	-0.169462	-0.0751184	NA	0.579225	0.728828	-0.631422	0.518108	NA	0.189452	NA	NA	0.0174506	0.697362	-0.257248	NA	-0.293252	-0.61014	0.675948	0.0612715	NA	-0.0382481	NA	0.00578423	0.183265	0.374941	0.569875	NA	-0.737424	NA	-0.391775	0.126541	0.0673707	NA	1	2	3	23
chr1:151307801-151310210	PI4KB	NA	NA	NA	NA	NA	NA	NA	NA	NA	NA	NA	NA	NA	-0.0308718	NA	NA	NA	NA	NA	NA	NA	NA	NA	NA	NA	NA	NA	NA	NA	NA	NA	NA	NA	1	0	1	1
chr6:109445862-109446135	MICAL1	NA	0.101053	-0.205201	0.862539	NA	-0.312225	NA	-0.557492	0.0638234	NA	NA	0.100937	-0.519111	-0.149558	0.015542	NA	-0.425465	-0.801157	NA	-0.503326	-0.874287	NA	0.00991764	0.794971	NA	NA	-0.254772	NA	-0.0860894	-0.524427	NA	NA	NA	0	2	2	19
chr2:74834643-74854292	HK2	NA	NA	NA	NA	NA	NA	NA	NA	NA	NA	NA	NA	NA	-0.0143094	NA	NA	NA	NA	NA	NA	NA	NA	NA	NA	NA	NA	NA	NA	NA	NA	NA	NA	NA	1	0	1	1
chr17:39659553-39660210	STARD3	-0.659311	-4.975e-05	-0.0106453	-0.417054	0.197909	0.00944648	0.255934	-0.408889	0.413598	NA	0.824301	0.00136412	-0.740752	-0.0958778	0.369303	-0.297662	0.833459	-0.368349	-0.436702	-0.143285	-0.412263	0.471738	0.233379	0.588017	0.313407	0.26459	0.785726	-0.338356	0.546214	0.0583956	-0.564349	0.122177	NA	2	2	4	31
chr7:105091314-105101424	KMT2E	NA	NA	NA	NA	NA	NA	NA	NA	NA	NA	NA	NA	NA	-0.0350455	NA	NA	NA	NA	NA	NA	NA	NA	NA	NA	NA	NA	NA	NA	NA	NA	NA	NA	NA	1	0	1	1
chr18:45916582-45917678	EPG5	NA	NA	NA	NA	NA	NA	NA	0.102937	NA	NA	NA	NA	NA	-0.018528	NA	NA	NA	NA	NA	NA	NA	NA	NA	NA	NA	NA	NA	NA	NA	NA	NA	NA	NA	1	0	1	2
chr17:56892229-56895342	TRIM25	NA	NA	NA	NA	NA	NA	NA	0.308253	NA	NA	NA	NA	NA	-0.0172607	NA	NA	NA	NA	NA	NA	NA	NA	NA	NA	NA	NA	0.585324	NA	NA	NA	NA	NA	NA	1	0	1	3
chr19:44846613-44865270	NECTIN2	NA	NA	NA	NA	NA	NA	NA	NA	NA	NA	NA	NA	NA	-0.00873146	NA	NA	NA	NA	NA	NA	NA	NA	NA	NA	NA	NA	NA	NA	NA	NA	NA	NA	NA	1	0	1	1
chr16:67197646-67197866	E2F4	0.75879	-0.0441707	NA	NA	0.204732	NA	NA	NA	-0.0443135	NA	NA	0.0437755	-0.391979	-0.189838	0.352969	NA	0.156753	NA	NA	NA	NA	0.286224	NA	NA	NA	NA	NA	NA	NA	NA	0.388723	NA	NA	2	1	3	11
chr16:31034325-31034461	STX4	0.113536	-0.547529	-0.0472001	0.700948	-0.316447	0.220358	0.269852	0.611913	-0.373808	-0.147845	0.390423	0.00073882	0.0926797	-0.15959	0.133198	0.398195	-0.10251	-0.235831	-0.400244	0.501613	-0.0707161	-0.518973	0.0392546	-0.207884	0.745663	0.126128	-0.279894	0.317685	0.126247	-0.564261	-0.886778	0.302699	0.203598	1	2	3	33
chr14:102721084-102721319	RCOR1	NA	NA	NA	NA	NA	NA	NA	-0.441079	NA	NA	NA	NA	NA	-0.00235603	NA	NA	NA	NA	NA	NA	NA	NA	NA	NA	NA	NA	0.290344	NA	NA	NA	NA	NA	NA	1	0	1	3
chr11:212981-213298	RIC8A	NA	NA	NA	NA	NA	NA	NA	NA	NA	NA	NA	NA	NA	-0.0259687	NA	NA	NA	NA	NA	NA	NA	-0.923051	NA	NA	NA	NA	NA	NA	NA	NA	NA	NA	NA	1	0	1	2
chr1:246867351-246867660	AHCTF1	NA	NA	NA	NA	NA	NA	NA	NA	NA	NA	NA	NA	NA	-0.0467561	NA	NA	NA	NA	NA	NA	NA	NA	NA	NA	NA	NA	NA	NA	NA	NA	NA	NA	NA	1	0	1	1
chr7:73307757-73308430	NSUN5	0.456279	-0.00556113	-0.0142189	0.0424648	-0.125223	0.710797	0.280633	0.403918	-0.486233	NA	NA	0.351012	-0.0688467	-0.258008	NA	NA	-0.355687	-0.287679	NA	NA	0.425315	NA	NA	-0.425144	NA	0.403033	0.698232	NA	NA	-0.174859	NA	NA	NA	2	1	3	19
chr22:19802216-19806658	GNB1L	NA	NA	NA	NA	NA	NA	NA	0.0331003	NA	NA	NA	NA	NA	NA	NA	NA	NA	NA	NA	NA	NA	NA	NA	NA	NA	NA	NA	NA	NA	NA	NA	NA	NA	0	1	1	1
chr7:23505569-23505745	TRA2A	-0.467464	-0.760715	NA	0.165134	0.470345	NA	NA	0.242406	NA	NA	-0.128441	9.4e-07	-0.359401	-0.200723	NA	0.35657	-0.241492	0.278104	NA	NA	0.565849	NA	NA	NA	NA	NA	0.216847	NA	NA	NA	0.0429555	0.284709	NA	0	2	2	16
chr16:85663614-85665014	GSE1	NA	NA	-0.0007037	-0.230255	0.6444	NA	NA	0.216925	NA	NA	NA	0.0142137	NA	-0.00160212	NA	NA	-0.527615	-0.377476	NA	-0.678532	0.415698	NA	NA	0.509746	NA	NA	0.651569	-0.663922	NA	NA	NA	NA	NA	2	1	3	13
chr11:69062990-69063894	TPCN2	NA	NA	NA	NA	NA	NA	NA	NA	NA	NA	NA	NA	NA	-0.025951	NA	NA	NA	NA	NA	NA	NA	NA	NA	NA	NA	NA	NA	NA	NA	NA	NA	NA	NA	1	0	1	1
chr11:63998687-63998837	MACROD1	0.118559	-0.00263391	-0.00018028	0.0854315	0.394397	0.388012	NA	-0.38675	0.733852	NA	NA	0.119353	0.236993	NA	0.246597	0.173206	0.374787	0.30891	NA	0.232965	-0.21469	0.541686	0.00736131	0.134576	-0.375401	0.580335	-0.211626	NA	NA	-0.357078	-0.330066	0.204626	NA	2	1	3	25
chr9:87658127-87668596	DAPK1	NA	NA	NA	NA	NA	NA	NA	NA	NA	NA	NA	NA	NA	-0.00066558	NA	NA	NA	NA	NA	NA	NA	NA	NA	NA	NA	NA	NA	NA	NA	NA	NA	NA	NA	1	0	1	1
chr6:118816294-118826146	MCM9	NA	NA	NA	NA	NA	NA	NA	NA	NA	NA	NA	NA	NA	-0.0354512	NA	NA	NA	NA	NA	NA	NA	NA	NA	NA	NA	NA	NA	NA	NA	NA	NA	NA	NA	1	0	1	1
chrX:136713370-136732101	ARHGEF6	NA	NA	NA	NA	NA	NA	NA	NA	NA	NA	NA	NA	NA	-0.0220428	NA	NA	NA	NA	NA	NA	NA	NA	NA	NA	NA	NA	NA	NA	NA	NA	NA	NA	NA	1	0	1	1
chr1:43972334-43972414	DPH2	NA	0.177933	0.429658	-0.650391	-0.608189	0.69251	NA	-0.428313	-0.0737617	-0.162841	NA	NA	NA	-0.0408069	0.274878	NA	-0.488099	-0.29767	NA	-0.434477	NA	NA	NA	-0.0380624	NA	-0.845326	0.0451776	-0.52249	NA	NA	NA	-0.706575	NA	2	1	3	18
chr3:51541650-51590366	RAD54L2	NA	NA	NA	NA	NA	NA	NA	NA	NA	NA	NA	NA	NA	-0.0382612	NA	NA	NA	NA	NA	NA	NA	NA	NA	NA	NA	NA	NA	NA	NA	NA	NA	NA	NA	1	0	1	1
chr6:29607218-29608600	GABBR1	NA	NA	NA	NA	-0.15298	NA	NA	-0.485813	-0.648725	NA	NA	NA	NA	NA	NA	NA	NA	0.212915	NA	NA	NA	0.152609	NA	NA	NA	0.0212436	NA	0.465422	NA	NA	NA	NA	NA	0	1	1	7
chr10:97366233-97366445	RRP12	NA	NA	NA	NA	NA	NA	NA	NA	NA	NA	NA	NA	NA	-0.0346679	NA	NA	NA	NA	NA	NA	NA	NA	NA	NA	NA	NA	NA	NA	NA	NA	NA	NA	NA	1	0	1	1
chr19:10358138-10359174	TYK2	NA	NA	NA	NA	NA	NA	NA	NA	NA	NA	NA	NA	NA	-0.0371932	NA	NA	NA	NA	NA	-0.0631604	NA	NA	NA	NA	NA	NA	NA	NA	NA	NA	NA	NA	NA	1	0	1	2
chr12:57105599-57106190	STAT6	0.191815	-0.00050191	-0.142902	0.66303	0.264051	0.202214	0.24123	0.5902	0.779098	-0.604723	-0.288312	0.00491568	0.106592	-0.123463	0.0975962	0.0445413	-0.0391098	-0.525823	-0.551384	0.902284	-0.0538311	0.286447	0.0858748	-0.453986	0.312196	0.79604	-0.762057	0.318436	0.677324	0.518442	0.544837	0.113341	0.674781	2	2	4	33
chr6:44152008-44152592	TMEM63B	NA	-0.383659	NA	NA	NA	NA	NA	0.399804	NA	NA	NA	NA	NA	-0.0241455	NA	NA	-0.91969	0.783679	NA	NA	0.493691	NA	NA	NA	NA	NA	NA	NA	NA	NA	NA	NA	NA	1	0	1	6
chr2:230446902-230449087	SP100	NA	NA	NA	NA	NA	NA	NA	NA	NA	NA	NA	NA	NA	-0.0211178	NA	NA	NA	NA	NA	NA	NA	NA	NA	NA	NA	NA	NA	NA	NA	NA	NA	NA	NA	1	0	1	1
chr4:8209822-8212700	SH3TC1	NA	NA	NA	NA	NA	NA	NA	NA	NA	NA	NA	NA	NA	-0.0154744	NA	NA	NA	NA	NA	NA	NA	NA	NA	NA	NA	NA	NA	NA	NA	NA	NA	NA	NA	1	0	1	1
chr17:74696217-74698368	CD300LF	NA	NA	NA	NA	NA	NA	NA	NA	NA	NA	NA	NA	NA	-0.00442681	NA	NA	NA	NA	NA	NA	NA	NA	NA	NA	NA	NA	NA	NA	NA	NA	NA	NA	NA	1	0	1	1
chr9:137814508-137815946	EHMT1	-0.173162	-0.0457776	0.0149077	-0.448831	0.623365	NA	0.269357	0.735386	-0.664761	NA	NA	0.0105256	-0.532688	-0.0237773	-0.883756	NA	-0.372333	-0.0650053	-0.215965	NA	-0.123224	0.876447	0.124629	NA	-0.308638	NA	0.879528	-0.0174381	-0.336024	0.384764	NA	NA	NA	3	2	5	23
chrX:48476396-48477960	FTSJ1	NA	NA	NA	NA	NA	NA	NA	NA	NA	NA	NA	NA	NA	-0.0292229	NA	NA	NA	NA	NA	NA	NA	NA	NA	NA	NA	NA	NA	NA	NA	NA	NA	NA	NA	1	0	1	1
chr9:137429016-137429275	NOXA1	0.0081618	0.634982	-0.687573	0.254849	0.136148	-0.467572	NA	0.265673	0.66232	0.446116	0.390846	0.00560017	0.0675912	NA	0.250314	0.0105715	0.489624	0.217338	0.393208	-0.720421	-0.414636	0.216253	0.00466465	-0.217924	NA	NA	0.0705575	NA	0.286111	0.474944	0.277054	0.531537	NA	0	4	4	27
chr5:50794332-50794852	PARP8	NA	NA	NA	NA	NA	NA	NA	NA	NA	NA	NA	NA	NA	-0.0317147	NA	NA	NA	NA	NA	NA	NA	NA	NA	NA	NA	NA	NA	NA	NA	NA	NA	NA	NA	1	0	1	1
chr9:136443900-136445051	SEC16A	NA	-0.0372557	NA	NA	-0.435121	NA	NA	NA	-0.291459	NA	NA	0.168139	NA	-0.174217	0.600656	NA	0.845256	-0.10632	NA	NA	-0.235927	0.819833	NA	NA	NA	NA	NA	0.430283	NA	NA	NA	NA	NA	1	0	1	11
chr1:31662658-31665171	COL16A1	NA	NA	-0.813048	0.753923	-0.143758	NA	NA	-0.894544	0.348435	-0.488711	NA	NA	NA	NA	0.150828	NA	NA	-0.0866485	-0.901605	-0.221087	-0.133294	NA	NA	NA	-0.10727	0.655986	-0.0252235	NA	NA	NA	NA	NA	NA	1	0	1	14
chr17:82965746-83005114	B3GNTL1	NA	NA	NA	NA	NA	NA	NA	NA	NA	NA	NA	NA	NA	-0.0403663	NA	NA	NA	NA	NA	NA	NA	NA	NA	NA	NA	NA	NA	NA	NA	NA	NA	NA	NA	1	0	1	1
chr3:129298535-129301949	HMCES	NA	NA	NA	NA	NA	NA	NA	NA	NA	NA	NA	NA	NA	-0.0162777	NA	NA	NA	NA	NA	NA	NA	NA	NA	NA	NA	NA	NA	NA	NA	NA	NA	NA	NA	1	0	1	1
chr22:31099179-31099744	SMTN	NA	NA	NA	NA	NA	NA	NA	NA	NA	NA	NA	0.0232302	NA	NA	NA	NA	0.220166	0.740457	NA	NA	NA	NA	NA	NA	0.00087498	NA	NA	NA	NA	NA	NA	NA	NA	0	2	2	4
chr2:101870415-101873646	MAP4K4	NA	NA	NA	NA	NA	NA	NA	NA	NA	NA	NA	NA	NA	-0.00356432	NA	NA	NA	NA	NA	NA	NA	NA	NA	NA	NA	NA	NA	NA	NA	NA	NA	NA	NA	1	0	1	1
chr14:35539690-35548507	RALGAPA1	NA	NA	NA	NA	NA	NA	NA	0.0178172	NA	NA	NA	NA	NA	NA	NA	NA	NA	NA	NA	NA	NA	NA	NA	NA	NA	NA	-0.847099	NA	NA	NA	NA	NA	NA	0	1	1	2
chr6:109379662-109382203	CD164	NA	NA	NA	NA	NA	NA	NA	NA	NA	NA	NA	NA	NA	-0.00108011	NA	NA	NA	NA	NA	NA	NA	NA	NA	NA	NA	NA	NA	NA	NA	NA	NA	NA	NA	1	0	1	1
chr22:38128430-38129453	PLA2G6	NA	NA	NA	NA	NA	NA	NA	0.267919	NA	NA	NA	NA	NA	-0.107126	0.00107965	NA	NA	0.168875	NA	0.00887329	NA	NA	NA	NA	NA	NA	0.0172111	NA	NA	-0.551515	NA	NA	NA	0	3	3	7
chr9:128824174-128824770	AL441992.2	NA	NA	NA	NA	NA	NA	NA	NA	NA	NA	NA	NA	NA	-0.0205789	NA	NA	NA	NA	NA	NA	NA	NA	NA	NA	NA	NA	NA	NA	NA	NA	NA	NA	NA	1	0	1	1
chr3:185645623-185647024	IGF2BP2	NA	NA	NA	0.540303	0.493167	0.29725	NA	-0.440622	NA	NA	-0.944883	NA	-0.0758245	-0.344476	NA	NA	NA	-0.26333	0.908216	0.254559	-0.0259683	NA	NA	0.368942	NA	0.170225	0.753723	NA	0.254807	NA	NA	0.304854	NA	1	0	1	16
chr14:65054689-65061180	CHURC1-FNTB	NA	NA	NA	NA	NA	NA	NA	0.619817	NA	NA	NA	NA	NA	-0.0040719	NA	NA	NA	NA	NA	0.417276	NA	NA	NA	NA	NA	NA	0.38254	NA	NA	NA	NA	NA	NA	1	0	1	4
chr6:154733930-154773988	SCAF8	NA	NA	NA	NA	NA	NA	NA	NA	NA	NA	NA	NA	NA	-0.0120215	NA	NA	NA	NA	NA	NA	NA	NA	NA	NA	NA	NA	NA	NA	NA	NA	NA	NA	NA	1	0	1	1
chr16:4364413-4364596	CORO7-PAM16	NA	NA	NA	NA	NA	NA	NA	NA	NA	NA	NA	NA	NA	-0.0205409	NA	NA	NA	NA	NA	NA	NA	NA	NA	NA	NA	NA	NA	NA	NA	NA	NA	NA	NA	1	0	1	1
chr1:43964321-43966574	IPO13	NA	NA	NA	NA	NA	NA	NA	NA	NA	NA	NA	0.0616449	NA	-0.0101716	NA	NA	NA	NA	NA	NA	NA	NA	NA	NA	NA	NA	NA	NA	NA	NA	NA	NA	NA	1	0	1	2
chr19:49830218-49830510	MED25	NA	NA	NA	NA	NA	NA	NA	NA	NA	NA	NA	NA	NA	-0.0232513	NA	NA	NA	NA	NA	NA	NA	NA	NA	NA	NA	NA	NA	NA	NA	NA	NA	NA	NA	1	0	1	1
chr3:41235843-41236348	CTNNB1	NA	NA	NA	NA	NA	NA	NA	NA	NA	NA	NA	NA	NA	-0.00420872	NA	NA	NA	NA	NA	NA	NA	NA	NA	NA	NA	NA	NA	NA	NA	NA	NA	NA	NA	1	0	1	1
chr5:181233763-181234173	TRIM41	0.0878657	-0.0623892	NA	0.700961	0.212905	NA	-0.544958	-0.371861	-0.313921	NA	NA	0.0288801	0.0428232	-0.0154648	0.968514	NA	-0.343666	0.576105	0.740457	0.44822	0.485355	0.89229	NA	NA	-0.103323	NA	0.613665	-0.450724	-0.417889	0.366912	NA	0.843216	NA	1	2	3	23
chr11:212759-212836	RIC8A	-0.0129415	NA	NA	NA	NA	NA	NA	0.412778	-0.260369	NA	NA	NA	NA	-0.026839	NA	NA	NA	NA	NA	NA	NA	-0.252601	NA	-0.0757187	NA	NA	NA	0.510883	NA	NA	-0.179817	NA	NA	2	0	2	8
chr17:75267901-75268082	MIF4GD	0.033817	-0.606177	0.0633912	0.881197	0.422153	0.0525555	NA	-0.356076	0.286601	-0.191687	0.53116	0.0017338	-0.389448	-0.471834	0.438805	-0.841912	-0.446965	0.812033	-0.42668	0.577418	-0.232666	-0.819384	0.130673	0.0320638	-0.128921	-0.50298	-0.550366	-0.412172	-0.370944	0.105117	0.0584719	0.0460868	0.266641	0	4	4	32
chr1:26766566-26767789	ARID1A	NA	NA	NA	NA	NA	NA	NA	NA	NA	NA	NA	NA	NA	-0.00104647	NA	NA	NA	NA	NA	NA	NA	NA	NA	NA	NA	NA	NA	NA	NA	NA	NA	NA	NA	1	0	1	1
chr1:55073906-55075456	USP24	NA	NA	NA	NA	NA	NA	NA	NA	NA	NA	NA	NA	NA	-0.0107568	NA	NA	NA	NA	NA	NA	NA	NA	NA	NA	NA	NA	NA	NA	NA	NA	NA	NA	NA	1	0	1	1
chr22:47111603-47173497	TBC1D22A	NA	NA	NA	NA	NA	NA	NA	NA	NA	NA	NA	NA	NA	-0.00208657	NA	NA	NA	NA	NA	NA	NA	NA	NA	NA	NA	NA	NA	NA	NA	NA	NA	NA	NA	1	0	1	1
chr17:4307123-4366270	UBE2G1	NA	NA	NA	NA	NA	NA	NA	NA	NA	NA	NA	NA	NA	-0.0004183	NA	NA	NA	NA	NA	NA	NA	NA	NA	NA	NA	NA	NA	NA	NA	NA	NA	NA	NA	1	0	1	1
chr22:46287154-46288422	TTC38	NA	NA	NA	NA	0.306705	NA	NA	0.205888	NA	NA	NA	0.0254491	-0.600842	-0.048998	NA	0.170636	NA	NA	NA	NA	NA	NA	NA	NA	NA	NA	0.488516	NA	NA	NA	NA	NA	NA	1	1	2	7
chr2:181495937-181498622	ITGA4	NA	NA	NA	NA	NA	NA	NA	NA	NA	NA	NA	NA	NA	-0.042514	NA	NA	NA	NA	NA	NA	NA	NA	NA	NA	NA	NA	NA	NA	NA	NA	NA	NA	NA	1	0	1	1
chr7:76330233-76358721	YWHAG	NA	NA	NA	NA	NA	NA	NA	NA	NA	NA	NA	NA	NA	-0.0400888	NA	NA	NA	NA	NA	NA	NA	NA	NA	NA	NA	NA	NA	NA	NA	NA	NA	NA	NA	1	0	1	1
chr22:50283186-50283336	PLXNB2	NA	NA	NA	NA	NA	NA	NA	NA	NA	NA	NA	NA	NA	-0.0204113	NA	NA	NA	NA	NA	NA	NA	NA	NA	NA	NA	NA	NA	NA	NA	NA	NA	NA	NA	1	0	1	1
chr16:653451-653524	WDR90	NA	NA	NA	NA	NA	NA	NA	-0.159729	NA	NA	NA	NA	NA	-0.0060371	NA	NA	NA	NA	NA	0.15613	NA	NA	NA	NA	NA	NA	-0.559482	NA	NA	NA	NA	NA	NA	1	0	1	4
chr19:10916777-10919594	CARM1	NA	NA	NA	NA	NA	NA	NA	NA	NA	NA	NA	0.411403	-0.0290084	-0.00510985	-0.18064	NA	NA	NA	NA	NA	NA	NA	NA	NA	NA	NA	NA	NA	0.66426	NA	NA	NA	NA	2	0	2	5
chr19:7963807-7967564	ELAVL1	NA	NA	NA	NA	NA	NA	NA	NA	NA	NA	NA	NA	NA	-0.0126151	NA	NA	NA	NA	NA	NA	NA	NA	NA	NA	NA	NA	NA	NA	NA	NA	NA	NA	NA	1	0	1	1
chr12:30632011-30634082	IPO8	NA	NA	NA	NA	NA	NA	NA	-0.189204	NA	NA	NA	0.00854861	NA	-0.110932	0.147224	NA	NA	NA	NA	NA	NA	NA	NA	NA	NA	NA	NA	-0.34371	-0.833164	NA	NA	NA	NA	0	1	1	6
chr1:212348497-212349188	PPP2R5A	NA	NA	NA	NA	NA	NA	NA	NA	NA	NA	NA	NA	NA	-0.0275177	NA	NA	NA	NA	NA	NA	NA	NA	NA	NA	NA	NA	NA	NA	NA	NA	NA	NA	NA	1	0	1	1
chr17:21021226-21028541	USP22	NA	NA	NA	NA	NA	NA	NA	NA	NA	NA	NA	NA	NA	-0.0115598	NA	NA	NA	NA	NA	NA	NA	NA	NA	NA	NA	NA	NA	NA	NA	NA	NA	NA	NA	1	0	1	1
chr20:3801388-3801721	CDC25B	-0.273954	-0.0406467	-0.140302	0.512787	0.151029	0.505202	0.310512	-0.256316	-0.0786698	NA	NA	0.316357	NA	NA	-0.445133	NA	0.847574	-0.540015	0.451656	NA	-0.0910764	0.452312	NA	0.246926	-0.0494802	0.308912	-0.16817	0.493313	NA	0.101971	NA	0.281684	NA	2	0	2	23
chr7:38745613-38752175	VPS41	NA	NA	NA	NA	NA	NA	NA	0.707263	NA	NA	NA	0.0137004	0.455249	-0.0217401	NA	NA	NA	NA	NA	NA	NA	NA	NA	NA	NA	0.873094	-0.206435	-0.512443	NA	NA	NA	NA	NA	1	1	2	7
chrX:1348545-1352099	IL3RA	NA	NA	NA	NA	NA	NA	NA	NA	-0.713835	NA	NA	NA	NA	-0.0024247	-0.0315883	NA	NA	NA	NA	NA	NA	NA	NA	NA	NA	NA	NA	NA	0.163409	0.0270558	NA	NA	NA	2	1	3	5
chrX:153952958-153953606	HCFC1	NA	NA	NA	NA	NA	NA	NA	NA	NA	NA	NA	NA	NA	-0.00053463	NA	NA	NA	NA	NA	NA	NA	NA	NA	NA	NA	NA	NA	NA	NA	NA	NA	NA	NA	1	0	1	1
chr5:76677350-76683114	IQGAP2	NA	NA	NA	NA	NA	NA	NA	NA	NA	NA	NA	NA	NA	-0.0104953	NA	NA	NA	NA	NA	NA	NA	NA	NA	NA	NA	NA	NA	NA	NA	NA	NA	NA	NA	1	0	1	1
chr2:97792984-97793394	TMEM131	NA	NA	NA	NA	NA	NA	NA	0.286782	NA	NA	NA	0.0622427	NA	-0.00245888	0.162996	NA	0.548921	-0.0399985	NA	-0.436787	NA	NA	NA	NA	NA	NA	-0.151359	NA	NA	NA	NA	NA	NA	2	0	2	8
chr15:75468983-75469791	PTPN9	NA	NA	NA	NA	NA	NA	NA	NA	NA	NA	NA	NA	NA	-0.00134636	NA	NA	NA	NA	NA	NA	NA	NA	NA	NA	NA	NA	NA	NA	NA	NA	NA	NA	NA	1	0	1	1
chrX:53197044-53197770	KDM5C	NA	NA	NA	NA	NA	NA	NA	NA	NA	NA	NA	NA	NA	-0.00444351	NA	NA	NA	NA	NA	NA	NA	NA	NA	NA	NA	NA	NA	NA	NA	NA	NA	NA	NA	1	0	1	1
chr22:29287134-29288605	EWSR1	NA	NA	NA	NA	NA	NA	NA	NA	NA	NA	NA	NA	NA	-0.0175376	NA	NA	NA	NA	NA	NA	NA	NA	NA	NA	NA	NA	NA	NA	NA	NA	NA	NA	NA	1	0	1	1
chr1:16199254-16201781	ARHGEF19	NA	-0.182275	-0.376331	0.0440532	NA	NA	NA	-0.506874	NA	NA	NA	NA	NA	-0.307924	NA	NA	-0.202001	-0.823225	NA	0.266658	NA	NA	NA	NA	NA	NA	NA	NA	NA	NA	NA	-0.565276	NA	0	1	1	9
chr6:43018971-43019091	KLHDC3	NA	NA	NA	NA	NA	NA	NA	NA	NA	NA	NA	NA	NA	-0.0205224	NA	NA	NA	NA	NA	NA	NA	NA	NA	NA	NA	NA	NA	NA	NA	NA	NA	NA	NA	1	0	1	1
chr4:508970-515972	PIGG	NA	NA	NA	NA	NA	NA	NA	0.119535	NA	NA	NA	NA	NA	-0.0484629	NA	NA	NA	NA	NA	NA	NA	NA	NA	NA	NA	NA	NA	NA	NA	NA	NA	NA	NA	1	0	1	2
chr19:17832929-17834570	JAK3	NA	NA	NA	NA	NA	NA	NA	NA	NA	NA	NA	NA	NA	-0.0165812	NA	NA	NA	NA	NA	NA	NA	NA	NA	NA	NA	NA	NA	NA	NA	NA	NA	NA	NA	1	0	1	1
chr8:144264142-144264224	BOP1	-0.325402	-0.00069798	-0.0715599	0.0124081	-0.163171	-0.255889	0.4096	-0.629987	NA	NA	0.789004	0.868914	-0.11606	-0.452223	NA	-0.248681	-0.0989872	0.21142	0.0242259	0.632818	-0.0534825	0.29735	0.0843956	0.600258	-0.00100613	-0.6397	0.297364	0.558364	0.352928	0.383811	0.67073	NA	NA	2	2	4	28
chr10:89433326-89436059	SLC16A12	NA	NA	NA	NA	NA	NA	NA	NA	NA	NA	NA	0.00681803	0.0207263	NA	NA	NA	NA	NA	NA	NA	NA	NA	NA	NA	NA	NA	NA	NA	NA	NA	NA	NA	NA	0	2	2	2
chr17:17228161-17231793	FLCN	NA	NA	NA	NA	0.0919884	NA	NA	0.111148	NA	NA	NA	0.00047414	NA	-0.0328323	NA	NA	NA	NA	NA	-0.0250233	NA	NA	NA	NA	-0.342931	NA	0.0218871	NA	0.582285	NA	NA	NA	NA	2	2	4	8
chr1:228103049-228103133	C1orf35	NA	NA	NA	NA	NA	NA	NA	0.00543385	NA	NA	NA	NA	NA	NA	NA	NA	NA	NA	NA	0.643404	NA	NA	NA	NA	NA	NA	-0.528919	NA	NA	NA	NA	NA	NA	0	1	1	3
chr1:37885825-37886887	INPP5B	NA	NA	NA	NA	NA	NA	NA	NA	NA	NA	NA	NA	NA	-0.0348759	NA	NA	NA	NA	NA	NA	NA	NA	NA	NA	NA	NA	NA	NA	NA	NA	NA	NA	NA	1	0	1	1
chr3:42619127-42619663	NKTR	NA	NA	NA	NA	NA	NA	NA	0.283225	NA	NA	NA	NA	NA	-0.00468449	-0.262051	NA	NA	NA	NA	NA	NA	NA	NA	NA	NA	NA	-0.775309	NA	NA	NA	NA	NA	NA	1	0	1	4
chr22:20141012-20141216	ZDHHC8	NA	NA	NA	NA	NA	NA	NA	NA	NA	NA	NA	NA	NA	-0.00055832	NA	NA	NA	NA	NA	NA	NA	NA	NA	NA	NA	NA	NA	NA	NA	NA	NA	NA	NA	1	0	1	1
chr19:40705181-40705324	COQ8B	0.732219	-0.686618	-0.0096961	-0.0850353	0.641258	0.282751	0.177668	0.298924	0.0120881	-0.110835	0.0376519	0.00953861	-0.248091	-0.0150771	-0.227619	0.0115119	-0.154817	0.107596	-0.149955	0.310019	-0.0107116	-0.245865	0.855713	0.162177	0.0195157	0.0383807	-0.136134	-0.352388	0.444559	-0.402659	0.306294	0.342827	-0.370018	3	6	9	33
chr22:20749994-20751292	PI4KA	NA	NA	NA	NA	NA	NA	NA	NA	NA	NA	NA	NA	NA	-0.00012676	NA	NA	NA	NA	NA	NA	NA	NA	NA	NA	NA	NA	NA	NA	NA	NA	NA	NA	NA	1	0	1	1
chr15:89088563-89113724	ABHD2	NA	NA	NA	NA	NA	NA	NA	NA	NA	NA	NA	NA	NA	-0.0274023	NA	NA	NA	NA	NA	NA	NA	NA	NA	NA	NA	NA	NA	NA	NA	NA	NA	NA	NA	1	0	1	1
chr2:208325037-208325269	PIKFYVE	NA	NA	NA	NA	NA	NA	NA	NA	NA	NA	NA	NA	NA	-0.0182079	NA	NA	NA	NA	NA	NA	NA	NA	NA	NA	NA	NA	NA	NA	NA	NA	NA	NA	NA	1	0	1	1
chr1:30945483-30950132	PUM1	NA	NA	NA	NA	NA	NA	NA	NA	NA	NA	NA	NA	NA	-7.92e-05	NA	NA	NA	NA	NA	NA	NA	NA	NA	NA	NA	NA	NA	NA	NA	NA	NA	NA	NA	1	0	1	1
chr10:110881535-110883002	PDCD4	NA	NA	NA	NA	NA	NA	NA	NA	NA	NA	NA	NA	NA	-0.00080847	NA	NA	NA	NA	NA	NA	NA	NA	NA	NA	NA	NA	NA	NA	NA	NA	NA	NA	NA	1	0	1	1
chr12:52180608-52180902	KRT80	NA	0.813787	NA	-0.194732	0.258411	NA	NA	0.725026	NA	0.00689233	NA	NA	NA	NA	NA	NA	-0.234087	-0.134872	NA	-0.059399	NA	NA	NA	NA	NA	NA	0.284589	NA	NA	NA	NA	NA	NA	0	1	1	9
chr19:58207202-58209960	ZNF274	0.708525	NA	-0.0651154	-0.529577	-0.651335	NA	0.793655	-0.303932	-0.62359	NA	-0.356365	6.262e-05	0.631954	-0.476431	0.484291	NA	-0.222977	-0.381126	0.303334	0.423947	-0.578663	NA	0.108667	NA	NA	NA	-0.089371	-0.572431	0.140288	NA	NA	NA	NA	0	1	1	21
chr7:6426114-6430479	DAGLB	NA	NA	NA	NA	NA	NA	NA	NA	NA	NA	NA	NA	NA	-3.965e-05	NA	NA	NA	NA	NA	NA	NA	NA	NA	NA	NA	NA	NA	NA	NA	NA	NA	NA	NA	1	0	1	1
chr1:23778713-23779437	PITHD1	NA	NA	NA	NA	NA	NA	NA	NA	NA	NA	NA	NA	NA	-0.0228078	NA	NA	NA	NA	NA	NA	NA	NA	NA	NA	NA	-0.600833	NA	NA	NA	NA	NA	NA	NA	1	0	1	2
chr14:23069617-23071426	ACIN1	NA	NA	NA	NA	NA	NA	NA	NA	NA	NA	NA	NA	NA	-0.0493239	NA	NA	NA	NA	NA	NA	NA	NA	NA	NA	NA	NA	NA	NA	NA	NA	NA	NA	NA	1	0	1	1
chr1:42747412-42747722	P3H1	NA	NA	NA	NA	NA	NA	NA	NA	0.794605	NA	NA	NA	NA	-0.0335196	NA	NA	NA	NA	NA	NA	NA	NA	NA	NA	NA	NA	NA	NA	NA	NA	NA	NA	NA	1	0	1	2
chr1:151306363-151307573	PI4KB	NA	NA	NA	NA	NA	NA	NA	NA	NA	NA	NA	NA	NA	-0.00351619	NA	NA	NA	NA	NA	NA	NA	NA	NA	NA	NA	NA	NA	NA	NA	NA	NA	NA	NA	1	0	1	1
chr9:136369875-136370293	CARD9	NA	NA	NA	NA	NA	NA	NA	NA	NA	NA	NA	NA	NA	-0.0397801	NA	NA	NA	NA	NA	NA	NA	NA	NA	NA	NA	NA	NA	NA	NA	NA	NA	NA	NA	1	0	1	1
chr16:4405567-4407500	CORO7-PAM16	NA	NA	NA	NA	NA	NA	NA	NA	NA	NA	NA	NA	NA	-0.023595	NA	NA	NA	NA	NA	NA	NA	NA	NA	NA	NA	NA	NA	NA	NA	NA	NA	NA	NA	1	0	1	1
chr1:156806573-156807174	SH2D2A	NA	-0.020099	NA	-0.434394	-0.315239	NA	0.0950765	-0.6411	NA	-0.252628	NA	0.234306	NA	NA	NA	NA	-0.164357	-0.0628373	NA	0.385234	-0.0447598	-0.542402	NA	NA	NA	NA	0.364718	-0.221795	NA	-0.181687	NA	0.343672	NA	2	0	2	16
chr2:239090116-239095009	HDAC4	NA	NA	NA	NA	NA	NA	NA	NA	NA	NA	NA	NA	NA	-0.00206619	NA	NA	NA	NA	NA	NA	NA	NA	NA	NA	NA	NA	NA	NA	NA	NA	NA	NA	NA	1	0	1	1
chr1:1624901-1624990	MIB2	NA	-0.101946	NA	-0.116349	-0.517562	NA	0.250354	0.368525	0.44967	NA	NA	-0.312117	0.1283	-0.0154289	NA	NA	0.477647	-0.00975852	0.829667	-0.269116	-0.524317	NA	-0.0460565	NA	0.248074	-0.0154395	-0.600775	-0.311417	NA	-0.229859	NA	-0.276796	NA	4	0	4	21
chr12:66245262-66247694	IRAK3	NA	NA	NA	NA	NA	NA	NA	NA	NA	NA	NA	NA	NA	-0.0333401	NA	NA	NA	NA	NA	NA	NA	NA	NA	NA	NA	NA	NA	NA	NA	NA	NA	NA	NA	1	0	1	1
chr9:130878567-130880067	ABL1	NA	NA	NA	NA	NA	NA	NA	NA	NA	NA	NA	NA	NA	-0.00693656	NA	NA	NA	NA	NA	NA	NA	NA	NA	NA	NA	NA	NA	NA	NA	NA	NA	NA	-0.753465	1	0	1	2
chr6:166328357-166329506	SFT2D1	NA	NA	NA	NA	NA	NA	NA	NA	NA	NA	NA	NA	NA	-0.0209452	NA	NA	NA	NA	NA	NA	NA	NA	NA	NA	NA	NA	NA	NA	NA	NA	NA	NA	NA	1	0	1	1
chr16:11762747-11763477	ZC3H7A	NA	NA	NA	NA	NA	NA	NA	NA	NA	NA	NA	0.0112005	NA	-0.153436	NA	NA	NA	NA	NA	NA	NA	NA	NA	NA	NA	NA	NA	NA	NA	NA	NA	NA	NA	0	1	1	2
chr7:37216695-37222614	ELMO1	NA	NA	NA	NA	NA	NA	NA	NA	NA	NA	NA	NA	NA	-0.0171147	NA	NA	NA	NA	NA	NA	NA	NA	NA	NA	NA	NA	NA	NA	NA	NA	NA	NA	NA	1	0	1	1
chr5:38963041-38964791	RICTOR	NA	NA	NA	NA	NA	NA	NA	NA	NA	NA	NA	NA	NA	-0.0442177	NA	NA	NA	NA	NA	NA	NA	NA	NA	NA	NA	NA	NA	NA	NA	NA	NA	NA	NA	1	0	1	1
chr19:18446480-18446747	ELL	NA	NA	NA	NA	NA	NA	NA	NA	NA	NA	NA	NA	NA	-0.0151226	NA	NA	NA	NA	NA	NA	NA	NA	NA	NA	NA	NA	NA	NA	NA	NA	NA	NA	NA	1	0	1	1
chr14:102040410-102040597	DYNC1H1	NA	NA	NA	NA	NA	NA	NA	NA	NA	NA	NA	NA	NA	-3.36e-05	NA	NA	NA	NA	NA	NA	NA	NA	NA	NA	NA	NA	NA	NA	NA	NA	NA	NA	NA	1	0	1	1
chr1:150076312-150076915	VPS45	NA	NA	0.197311	0.382599	NA	NA	NA	-0.688879	NA	NA	NA	NA	NA	-0.55977	0.613436	NA	-0.0173842	NA	NA	0.583934	NA	NA	NA	NA	NA	0.851917	0.27158	NA	NA	NA	NA	NA	NA	1	0	1	9
chr3:12831572-12833754	CAND2	NA	NA	NA	NA	NA	NA	NA	NA	-0.00578102	NA	NA	NA	NA	NA	0.473263	NA	NA	NA	NA	NA	NA	NA	NA	NA	NA	NA	NA	NA	NA	NA	NA	NA	NA	1	0	1	2
chr19:48985605-48985849	GYS1	NA	NA	NA	NA	NA	NA	NA	NA	NA	NA	NA	NA	NA	-0.00100196	NA	NA	NA	NA	NA	NA	NA	NA	NA	NA	NA	NA	0.573736	NA	NA	NA	NA	NA	NA	1	0	1	2
chr7:100577154-100577272	LRCH4	-0.16657	0.258574	-0.0336069	-0.0356939	0.61286	-0.647831	0.229432	-0.599518	-0.66188	0.607765	0.127613	0.0216017	0.877506	-0.658489	-0.181622	-0.379538	0.302633	0.547548	0.485042	-0.116015	-0.290271	-0.184256	0.178644	0.45118	-0.28875	0.0690182	-0.315271	0.364554	0.109189	0.193947	-0.00062655	0.16025	0.0341874	3	2	5	33
chr1:110012462-110012896	AHCYL1	NA	NA	NA	NA	NA	NA	NA	NA	NA	NA	NA	NA	NA	-0.0241808	NA	NA	NA	NA	NA	NA	NA	NA	NA	NA	NA	NA	NA	NA	NA	NA	NA	NA	NA	1	0	1	1
chr1:228107869-228107976	MRPL55	-0.797491	-0.122258	-0.119436	NA	-0.464502	NA	NA	-0.195898	0.426214	NA	NA	0.0061642	-0.214334	NA	NA	NA	-0.332382	-0.676327	-0.599162	-0.583139	0.053847	NA	NA	NA	NA	0.0224811	NA	0.751248	NA	NA	-0.372075	-0.563465	NA	0	2	2	17
chr1:201485376-201488854	CSRP1	NA	NA	NA	NA	NA	NA	NA	NA	NA	NA	NA	NA	NA	-0.00460128	NA	NA	NA	NA	NA	NA	NA	NA	NA	NA	NA	NA	NA	NA	NA	NA	NA	NA	NA	1	0	1	1
chr4:99863855-99866033	DAPP1	NA	NA	NA	NA	NA	NA	-0.244776	-0.0244322	NA	NA	NA	NA	NA	-0.643405	NA	NA	NA	NA	NA	NA	NA	NA	NA	NA	NA	NA	NA	NA	NA	NA	NA	NA	NA	1	0	1	3
chr17:41516964-41517082	KRT15	NA	-0.258117	0.117704	0.101278	NA	-0.782919	NA	-0.827373	NA	NA	NA	NA	NA	NA	NA	NA	0.234131	-0.317941	0.535428	NA	-0.662562	NA	0.00588696	0.283593	NA	NA	0.470615	NA	NA	-0.565769	NA	NA	NA	0	1	1	13
chr3:127674600-127675969	ABTB1	NA	NA	NA	NA	NA	NA	NA	0.0151569	NA	NA	NA	NA	NA	-0.183064	NA	NA	NA	NA	NA	NA	NA	NA	NA	NA	NA	NA	NA	NA	NA	NA	NA	NA	NA	0	1	1	2
chr2:675630-675757	TMEM18	NA	0.1199	NA	0.273813	NA	NA	NA	-0.232372	0.168612	-0.262172	NA	0.0340526	NA	NA	NA	NA	NA	-0.50416	NA	0.515173	NA	NA	-0.893984	NA	-0.337748	NA	0.315619	NA	NA	-0.981046	NA	0.458115	NA	0	1	1	13
chr1:236803642-236806143	MTR	NA	NA	NA	NA	NA	NA	NA	NA	NA	NA	NA	NA	NA	-0.00780487	NA	NA	NA	NA	NA	NA	NA	NA	NA	NA	NA	NA	NA	NA	NA	NA	NA	NA	NA	1	0	1	1
chr22:35421460-35423213	MCM5	NA	NA	NA	NA	NA	NA	NA	NA	NA	NA	NA	NA	NA	-0.00063527	NA	NA	NA	NA	NA	NA	NA	NA	NA	NA	NA	NA	NA	NA	NA	NA	NA	NA	NA	1	0	1	1
chr7:36895017-37013298	ELMO1	NA	NA	NA	NA	NA	NA	NA	NA	NA	NA	NA	NA	NA	-0.0465056	NA	NA	NA	NA	NA	NA	NA	NA	NA	NA	NA	NA	NA	NA	NA	NA	NA	NA	NA	1	0	1	1
chr17:49705896-49706203	SLC35B1	NA	NA	NA	NA	NA	NA	NA	NA	NA	NA	NA	NA	-0.0231342	-0.0237824	NA	NA	NA	NA	NA	NA	NA	NA	NA	NA	NA	NA	NA	NA	NA	NA	NA	NA	NA	2	0	2	2
chr18:79729069-79736354	CTDP1	NA	NA	NA	NA	NA	NA	NA	0.0456601	NA	NA	NA	NA	NA	-0.0584017	NA	NA	NA	NA	NA	NA	NA	NA	NA	NA	NA	NA	NA	NA	NA	NA	NA	NA	NA	0	1	1	2
chr7:99033121-99035514	SMURF1	NA	NA	NA	NA	NA	NA	NA	NA	NA	NA	NA	NA	NA	-0.0027336	NA	NA	NA	NA	NA	NA	NA	NA	NA	NA	NA	NA	NA	NA	NA	NA	NA	NA	NA	1	0	1	1
chr3:9759750-9760655	CAMK1	NA	NA	0.0997449	NA	-0.0274483	NA	0.705472	-0.0934097	NA	NA	-0.781336	NA	NA	-0.241003	NA	NA	NA	NA	NA	0.436788	0.0653767	NA	NA	NA	NA	0.0954764	-0.862733	0.825061	NA	-0.0811795	NA	NA	NA	1	0	1	12
chr15:90970514-90974135	PRC1	NA	NA	NA	NA	NA	NA	NA	NA	NA	NA	NA	NA	NA	-0.0202001	NA	NA	NA	NA	NA	NA	NA	NA	NA	NA	NA	NA	NA	NA	NA	NA	NA	NA	NA	1	0	1	1
chr11:68601969-68603341	PPP6R3	NA	NA	NA	NA	NA	NA	NA	NA	NA	NA	NA	NA	NA	-0.0241437	NA	NA	NA	NA	NA	NA	NA	NA	NA	NA	NA	NA	NA	NA	NA	NA	NA	NA	NA	1	0	1	1
chr3:48981728-48982895	ARIH2	NA	NA	NA	NA	NA	NA	NA	NA	NA	NA	NA	NA	NA	-0.00556424	NA	NA	NA	NA	NA	NA	NA	NA	NA	NA	NA	NA	NA	NA	NA	NA	NA	NA	NA	1	0	1	1
chr3:48627052-48627945	SLC26A6	-0.0763811	0.228007	0.0739664	0.0283608	0.336326	0.00713811	0.55	-0.180601	-0.242096	-0.507683	NA	NA	-0.419228	-0.61049	-0.770838	0.0842887	-0.238288	-0.112577	-0.243141	0.36034	-0.436074	NA	0.0571997	0.0489373	-0.676062	0.655875	0.0125841	-0.00768983	0.249481	-0.129508	-0.247168	-0.372666	NA	1	4	5	29
chr5:140246057-140281448	PFDN1	NA	NA	NA	NA	NA	NA	NA	NA	NA	NA	NA	NA	NA	-0.0440703	NA	NA	NA	NA	NA	NA	NA	NA	NA	NA	NA	NA	NA	NA	NA	NA	NA	NA	NA	1	0	1	1
chr2:223882072-223884647	WDFY1	NA	NA	NA	NA	NA	NA	NA	NA	NA	NA	NA	NA	NA	-0.00832614	NA	NA	NA	NA	NA	NA	NA	NA	NA	NA	NA	NA	NA	NA	NA	NA	NA	NA	NA	1	0	1	1
chr4:150831976-150844099	LRBA	NA	NA	NA	NA	NA	NA	NA	NA	NA	NA	NA	NA	NA	-0.022225	NA	NA	NA	NA	NA	NA	NA	NA	NA	NA	NA	NA	NA	NA	NA	NA	NA	NA	NA	1	0	1	1
chr1:20950108-20969473	EIF4G3	NA	NA	NA	NA	NA	NA	NA	NA	NA	NA	NA	NA	NA	-0.0239956	NA	NA	NA	NA	NA	NA	NA	NA	NA	NA	NA	NA	NA	NA	NA	NA	NA	NA	NA	1	0	1	1
chr15:63609266-63612250	HERC1	NA	NA	NA	NA	NA	NA	NA	NA	NA	NA	NA	0.00515248	NA	-0.214185	NA	NA	NA	NA	NA	NA	NA	NA	NA	NA	NA	NA	NA	NA	NA	NA	NA	NA	NA	0	1	1	2
chr11:2945646-2949226	NAP1L4	NA	NA	NA	NA	NA	NA	NA	0.308568	NA	NA	NA	NA	NA	-0.0232288	NA	NA	NA	NA	NA	NA	NA	NA	NA	NA	NA	NA	0.0740798	NA	NA	NA	NA	NA	NA	1	0	1	3
chr1:27349498-27349651	SYTL1	NA	-0.411532	NA	0.0109831	NA	NA	0.195937	0.331893	NA	-0.227853	NA	NA	NA	-0.921059	NA	NA	-0.459635	0.184777	NA	-0.496708	-0.0666625	NA	NA	NA	NA	NA	-0.579223	NA	NA	0.499308	NA	NA	NA	0	1	1	12
chr6:41936695-41937234	CCND3	NA	NA	NA	NA	NA	NA	NA	NA	NA	NA	NA	NA	NA	-0.00881479	NA	NA	NA	NA	NA	NA	NA	NA	NA	NA	NA	NA	NA	NA	NA	NA	NA	NA	NA	1	0	1	1
chr22:37623467-37623551	GGA1	NA	NA	NA	NA	NA	NA	NA	NA	NA	NA	NA	NA	NA	-0.00756356	NA	NA	NA	NA	NA	NA	NA	NA	NA	NA	NA	NA	NA	NA	NA	NA	NA	NA	NA	1	0	1	1
chr8:143572185-143572420	MROH6	NA	NA	NA	NA	NA	NA	NA	0.459998	NA	NA	NA	NA	NA	-0.185318	NA	NA	NA	NA	NA	-0.0250199	NA	NA	NA	NA	NA	NA	-0.171008	NA	NA	NA	NA	NA	NA	1	0	1	4
chr1:153942356-153942555	DENND4B	NA	NA	-0.309632	-0.524103	0.280893	NA	NA	0.781083	0.145828	NA	NA	0.00157443	NA	-0.00277562	0.360343	NA	-0.172198	-0.705967	0.207029	-0.500568	0.361989	NA	NA	NA	0.821732	-0.568563	-0.439898	-0.563136	NA	NA	NA	NA	-0.528385	1	1	2	18
chr3:113784438-113784695	ATP6V1A	NA	NA	NA	NA	NA	NA	NA	NA	NA	NA	NA	NA	NA	-0.023548	NA	NA	NA	NA	NA	NA	NA	NA	NA	NA	NA	NA	NA	NA	NA	NA	NA	NA	NA	1	0	1	1
chr3:71696520-71699613	EIF4E3	NA	NA	NA	NA	NA	NA	NA	NA	NA	NA	NA	NA	NA	-0.00443208	NA	NA	NA	NA	NA	NA	NA	NA	NA	NA	NA	NA	NA	NA	NA	NA	NA	NA	NA	1	0	1	1
chr16:16068302-16071641	ABCC1	NA	NA	NA	NA	NA	NA	NA	NA	NA	NA	NA	NA	NA	-0.0482184	NA	NA	NA	NA	NA	NA	NA	NA	NA	NA	NA	NA	NA	NA	NA	NA	NA	NA	NA	1	0	1	1
chr16:4388631-4395288	CORO7-PAM16	NA	NA	NA	NA	NA	NA	NA	NA	NA	NA	NA	NA	NA	-0.0204505	NA	NA	NA	NA	NA	NA	NA	NA	NA	NA	NA	NA	NA	NA	NA	NA	NA	NA	NA	1	0	1	1
chr4:147633002-147633764	TMEM184C	NA	NA	NA	NA	NA	NA	NA	NA	NA	NA	NA	NA	NA	-0.0278617	NA	NA	NA	NA	NA	NA	NA	NA	NA	NA	NA	NA	NA	NA	NA	NA	NA	NA	NA	1	0	1	1
chr6:43049662-43049962	CUL7	NA	NA	NA	NA	NA	NA	NA	0.363959	NA	NA	NA	0.00564616	NA	-0.299333	NA	NA	-0.739857	-0.112256	-0.229958	-0.051887	NA	-0.976044	NA	NA	NA	0.588295	-0.165116	NA	-0.155044	NA	NA	-0.334309	-0.722573	0	1	1	13
chr16:22264880-22266389	EEF2K	NA	NA	NA	NA	NA	NA	NA	0.227734	NA	NA	NA	NA	NA	-0.00626009	NA	NA	NA	NA	NA	-0.163735	NA	NA	NA	NA	NA	NA	0.251461	NA	NA	NA	NA	NA	NA	1	0	1	4
chr17:49716315-49717512	FAM117A	NA	NA	NA	NA	NA	NA	NA	NA	NA	NA	NA	NA	NA	-0.00769205	NA	NA	NA	NA	NA	NA	NA	NA	NA	NA	NA	NA	NA	NA	NA	NA	NA	NA	NA	1	0	1	1
chr19:1055939-1056065	ABCA7	NA	NA	NA	NA	NA	NA	NA	0.251069	NA	NA	NA	NA	NA	-0.0406848	NA	NA	NA	NA	NA	NA	NA	NA	NA	NA	NA	NA	NA	NA	NA	NA	NA	NA	NA	1	0	1	2
chr19:6826711-6828075	VAV1	NA	NA	NA	NA	NA	NA	NA	NA	NA	NA	NA	NA	NA	-0.00020998	NA	NA	NA	NA	NA	NA	NA	NA	NA	NA	NA	NA	NA	NA	NA	NA	NA	NA	NA	1	0	1	1
chr11:90211318-90214017	CHORDC1	NA	NA	NA	NA	NA	NA	NA	-0.264076	NA	NA	NA	NA	NA	-0.0332258	-0.252318	NA	NA	NA	NA	NA	NA	NA	NA	NA	NA	NA	0.107387	NA	NA	NA	NA	NA	NA	1	0	1	4
chr5:58456589-58456944	PLK2	NA	NA	NA	NA	0.0164696	NA	NA	0.110163	NA	NA	NA	6.4e-07	0.508624	NA	NA	NA	NA	NA	NA	NA	0.115231	NA	NA	NA	NA	NA	0.308992	NA	NA	NA	NA	NA	NA	0	2	2	6
chr19:11325585-11335446	RAB3D	NA	NA	NA	NA	NA	NA	NA	NA	NA	NA	NA	NA	NA	-0.00014961	NA	NA	NA	NA	NA	NA	NA	NA	NA	NA	NA	NA	NA	NA	NA	NA	NA	NA	NA	1	0	1	1
chr13:100625676-100625784	TMTC4	NA	NA	NA	NA	NA	NA	NA	NA	NA	NA	NA	NA	NA	-0.0190703	NA	NA	NA	NA	NA	NA	NA	NA	NA	NA	NA	NA	NA	NA	NA	NA	NA	NA	NA	1	0	1	1
chr11:64767251-64767566	SF1	NA	NA	NA	NA	NA	NA	NA	NA	NA	NA	NA	NA	NA	-0.00357064	NA	NA	NA	NA	NA	NA	NA	NA	NA	NA	NA	NA	NA	NA	NA	NA	NA	NA	NA	1	0	1	1
chr17:17803849-17809389	RAI1	NA	-0.362437	-0.0407349	-0.126973	0.260441	NA	NA	0.491606	-0.0284224	NA	NA	-0.596734	NA	-0.103785	0.702197	NA	-0.0613494	-0.381989	0.136812	NA	0.161693	0.997121	NA	NA	NA	0.374479	0.315856	-0.565851	-0.655053	0.603313	NA	NA	-0.620067	2	0	2	20
chr1:155904502-155904730	RIT1	NA	NA	NA	NA	NA	NA	NA	0.509806	NA	NA	NA	NA	NA	-0.0209493	NA	NA	-0.278521	NA	NA	0.121924	NA	NA	NA	NA	NA	NA	0.456587	NA	NA	NA	NA	NA	NA	1	0	1	5
chr12:32740518-32742588	DNM1L	NA	NA	NA	NA	NA	NA	NA	NA	NA	NA	NA	NA	NA	-0.00157658	NA	NA	NA	NA	NA	NA	NA	NA	NA	NA	NA	NA	NA	NA	NA	NA	NA	NA	NA	1	0	1	1
chr13:20843886-20855626	XPO4	NA	NA	NA	NA	NA	NA	NA	NA	NA	NA	NA	NA	NA	-0.00216194	NA	NA	NA	NA	NA	NA	NA	NA	NA	NA	NA	NA	NA	NA	NA	NA	NA	NA	NA	1	0	1	1
chr5:37162566-37164272	CPLANE1	NA	NA	NA	NA	NA	NA	NA	NA	NA	NA	NA	NA	NA	-0.00337542	NA	NA	NA	NA	NA	NA	NA	NA	NA	NA	NA	NA	NA	NA	NA	NA	NA	NA	NA	1	0	1	1
chr17:8146765-8146896	PER1	NA	NA	NA	NA	NA	NA	NA	NA	NA	NA	NA	0.156351	NA	-0.0117919	NA	NA	0.433758	NA	0.261314	-0.4239	NA	-0.999119	0.513488	NA	NA	NA	0.148408	NA	0.189146	NA	NA	NA	NA	1	0	1	9
chr9:129005221-129005302	NUP188	NA	-0.378478	-0.104492	0.233107	-0.57121	NA	-0.533971	NA	0.345555	NA	NA	0.0292949	-0.508272	-0.189344	0.774717	NA	-0.155703	-0.0439768	NA	-0.00587806	-0.441117	-0.435456	-0.114242	NA	NA	0.579237	NA	-0.630462	0.824199	NA	NA	0.308351	NA	2	1	3	20
chr6:32167005-32167086	EGFL8	-0.402711	-0.191657	NA	0.033216	-0.439986	NA	NA	-0.212617	0.03452	NA	NA	0.140122	0.53737	-0.630105	0.0664588	NA	NA	-0.426435	-0.879292	-0.512552	0.386103	-0.808712	-0.813185	NA	0.532622	0.297482	-0.196486	0.599333	NA	0.28698	0.019043	-0.161959	-0.8687	0	3	3	24
chr17:40485007-40487035	TNS4	NA	-0.0822309	NA	-0.545619	NA	0.444261	NA	0.53486	NA	0.0010259	NA	NA	NA	NA	NA	NA	NA	0.306614	NA	NA	NA	NA	NA	-0.0504063	NA	NA	NA	NA	NA	NA	NA	NA	NA	0	1	1	7
chr3:32545106-32545848	DYNC1LI1	NA	NA	NA	NA	NA	NA	NA	NA	NA	NA	NA	NA	NA	-0.0300992	NA	NA	NA	NA	NA	NA	NA	NA	NA	NA	NA	NA	NA	NA	NA	NA	NA	NA	NA	1	0	1	1
chr11:65977899-65978599	SART1	NA	NA	NA	NA	NA	NA	NA	NA	NA	NA	NA	NA	NA	-0.0183087	NA	NA	NA	NA	NA	NA	NA	NA	NA	NA	NA	NA	NA	NA	NA	NA	NA	NA	NA	1	0	1	1
chr7:87849948-87854203	SLC25A40	NA	NA	NA	NA	NA	NA	NA	NA	NA	NA	NA	NA	NA	-0.015166	NA	NA	NA	NA	NA	NA	NA	NA	NA	NA	NA	NA	NA	NA	NA	NA	NA	NA	NA	1	0	1	1
chr17:47678413-47680019	KPNB1	NA	NA	NA	NA	NA	NA	NA	NA	NA	NA	NA	NA	NA	-1.678e-05	NA	NA	NA	NA	NA	NA	NA	NA	NA	NA	NA	NA	NA	NA	NA	NA	NA	NA	NA	1	0	1	1
chr2:169806892-169806970	SSB	-0.75613	-0.25496	NA	NA	0.561593	NA	NA	NA	NA	NA	NA	NA	-0.359089	-0.00638364	NA	-0.121675	NA	NA	NA	NA	NA	-0.854443	NA	NA	NA	-0.195792	NA	-0.823609	NA	-0.377474	NA	NA	NA	1	0	1	10
chr7:100881413-100881658	SRRT	-0.0389589	-0.0199547	0.255859	0.329067	0.380523	0.179077	0.544484	-0.0625998	0.19629	0.378239	-0.59309	0.0208362	-0.0147805	-0.00265388	0.0396692	NA	-0.576025	-0.276155	0.321285	0.637611	0.162561	-0.789205	0.3239	0.786404	-0.171397	-0.498574	0.425666	-0.408957	-0.199591	0.710889	NA	NA	NA	4	2	6	29
chr21:43959859-43967945	AGPAT3	NA	NA	NA	NA	NA	NA	NA	0.440957	NA	NA	NA	NA	NA	-0.00548067	NA	NA	NA	NA	NA	NA	NA	NA	NA	NA	NA	NA	NA	NA	NA	NA	NA	NA	NA	1	0	1	2
chr16:31182664-31183857	FUS	NA	NA	NA	NA	NA	NA	NA	NA	NA	NA	NA	NA	NA	-0.0184034	NA	NA	NA	NA	NA	NA	NA	NA	NA	NA	NA	NA	NA	NA	NA	NA	NA	NA	NA	1	0	1	1
chr11:59795482-59800854	STX3	NA	NA	NA	NA	NA	NA	NA	NA	NA	NA	NA	0.0364076	0.163729	NA	NA	NA	NA	NA	NA	0.377082	NA	NA	NA	NA	NA	NA	NA	NA	NA	NA	NA	NA	NA	0	1	1	3
chr16:1449327-1450496	CLCN7	-0.331258	-0.003058	-0.137697	0.672565	-0.796634	0.362819	0.310167	-0.167576	0.229594	0.350223	-0.288312	0.0137264	0.305232	-0.00057763	-0.447748	0.325371	0.515168	-0.701834	0.92407	0.745227	-0.406946	0.16067	0.00455439	0.596974	0.778117	0.25748	-0.227705	-0.260673	-0.362815	0.644528	-0.0843346	0.490859	0.117948	2	2	4	33
chr4:2908604-2914883	ADD1	NA	NA	NA	NA	NA	NA	NA	NA	NA	NA	NA	NA	NA	-0.00043616	NA	NA	NA	NA	NA	NA	NA	NA	NA	NA	NA	NA	NA	NA	NA	NA	NA	NA	NA	1	0	1	1
chr11:34092056-34096478	CAPRIN1	NA	NA	NA	NA	NA	NA	NA	NA	NA	NA	NA	NA	NA	-4.884e-05	NA	NA	NA	NA	NA	NA	NA	NA	NA	NA	NA	NA	NA	NA	NA	NA	NA	NA	NA	1	0	1	1
chr3:46681407-46681499	ALS2CL	NA	NA	NA	NA	NA	NA	NA	0.53453	NA	NA	NA	NA	NA	NA	NA	NA	NA	NA	NA	NA	NA	NA	NA	NA	NA	NA	-0.0275812	NA	NA	NA	NA	NA	NA	1	0	1	2
chr6:110435961-110438719	SLC22A16	NA	NA	NA	NA	NA	NA	NA	NA	NA	NA	NA	NA	NA	-0.015012	NA	NA	NA	NA	NA	NA	NA	NA	NA	NA	NA	NA	NA	NA	NA	NA	NA	NA	NA	1	0	1	1
chr19:38893867-38898378	SIRT2	NA	NA	-0.438664	NA	NA	NA	NA	-0.31815	NA	NA	NA	0.00485346	NA	NA	NA	NA	NA	-0.756991	NA	NA	-0.559467	-0.702645	NA	NA	0.362264	0.365464	0.676621	NA	0.139662	NA	NA	NA	NA	0	1	1	10
chr14:49838206-49840717	NEMF	NA	NA	NA	NA	NA	NA	NA	NA	NA	NA	NA	NA	NA	-0.0078509	NA	NA	NA	NA	NA	NA	NA	NA	NA	NA	NA	NA	NA	NA	NA	NA	NA	NA	NA	1	0	1	1
chr16:24191230-24214657	PRKCB	NA	NA	NA	NA	NA	NA	NA	NA	NA	NA	NA	NA	NA	-0.0421382	NA	NA	NA	NA	NA	NA	NA	NA	NA	NA	NA	NA	NA	NA	NA	NA	NA	NA	NA	1	0	1	1
chr12:11869969-11884444	ETV6	NA	NA	NA	NA	NA	NA	NA	NA	NA	NA	NA	NA	NA	-0.0267512	NA	NA	NA	NA	NA	NA	NA	NA	NA	NA	NA	NA	NA	NA	NA	NA	NA	NA	NA	1	0	1	1
chr19:6707929-6709683	C3	NA	NA	NA	NA	0.331206	NA	NA	NA	NA	NA	NA	NA	-0.129915	NA	-0.0389956	-0.746092	NA	NA	NA	-0.663786	NA	NA	NA	NA	NA	NA	-0.292893	NA	NA	NA	NA	NA	NA	1	0	1	6
chr10:86497319-86499717	WAPL	NA	NA	NA	NA	NA	NA	NA	0.0286062	NA	NA	NA	NA	NA	-0.828183	NA	NA	NA	NA	NA	NA	NA	NA	NA	NA	NA	NA	NA	NA	NA	NA	NA	NA	NA	0	1	1	2
chr11:64767079-64767191	SF1	NA	NA	NA	NA	NA	NA	NA	NA	NA	NA	NA	NA	NA	-0.0152099	NA	NA	NA	NA	NA	NA	NA	NA	NA	NA	NA	NA	NA	NA	NA	NA	NA	NA	NA	1	0	1	1
chr11:126267712-126268002	SRPRA	NA	NA	NA	NA	NA	NA	NA	NA	NA	NA	NA	NA	-0.49683	-0.00121261	0.503066	NA	NA	NA	NA	NA	NA	-0.461168	NA	NA	NA	NA	NA	NA	-0.299598	NA	NA	NA	NA	1	0	1	5
chr3:13343303-13351878	NUP210	NA	NA	-0.0129772	0.125722	NA	NA	NA	0.0709195	NA	NA	NA	NA	NA	-0.517307	NA	NA	NA	NA	NA	-0.0295587	NA	NA	NA	NA	NA	NA	0.612417	NA	NA	NA	NA	NA	NA	2	0	2	6
chr4:39866997-39869393	PDS5A	NA	NA	NA	NA	NA	NA	NA	NA	NA	NA	NA	NA	NA	-0.00417766	NA	NA	NA	NA	NA	NA	NA	NA	NA	NA	NA	NA	NA	NA	NA	NA	NA	NA	NA	1	0	1	1
chr6:89158460-89161782	PM20D2	NA	NA	NA	NA	NA	NA	NA	NA	NA	NA	NA	NA	NA	-0.00627954	NA	NA	NA	NA	NA	NA	NA	NA	NA	NA	NA	NA	NA	NA	NA	NA	NA	NA	NA	1	0	1	1
chr17:59682793-59682906	CLTC	NA	NA	NA	NA	NA	NA	NA	NA	NA	NA	NA	NA	NA	-0.00084163	NA	NA	NA	NA	NA	NA	NA	NA	NA	NA	NA	NA	NA	NA	NA	NA	NA	NA	NA	1	0	1	1
chr14:24185567-24185860	IPO4	NA	NA	NA	NA	NA	NA	NA	NA	NA	NA	NA	NA	NA	-0.00763691	NA	NA	NA	NA	NA	NA	NA	NA	NA	NA	NA	NA	NA	NA	NA	NA	NA	NA	NA	1	0	1	1
chr4:3230042-3233162	HTT	NA	NA	NA	NA	NA	NA	NA	NA	NA	NA	NA	NA	NA	-0.0354271	NA	NA	NA	NA	NA	NA	NA	NA	NA	NA	NA	NA	NA	NA	NA	NA	NA	NA	NA	1	0	1	1
chr9:95080780-95082574	AOPEP	NA	-0.0186612	NA	NA	NA	NA	NA	NA	0.467073	NA	NA	NA	-0.0176294	NA	0.138376	-0.519447	NA	NA	NA	NA	NA	0.25288	NA	NA	NA	NA	NA	NA	0.325653	NA	NA	NA	NA	2	0	2	7
chr17:39716605-39717319	ERBB2	NA	-0.149151	NA	NA	0.913742	NA	NA	NA	NA	NA	NA	NA	0.236093	NA	NA	NA	NA	NA	NA	NA	-0.023252	NA	NA	NA	NA	NA	NA	NA	NA	NA	NA	NA	NA	1	0	1	4
chr20:2864287-2864364	PTPRA	0.277523	-0.0195315	-0.468407	-0.0568623	-0.546141	0.240636	0.260116	-0.363813	-0.404548	-0.549575	0.620955	3.435e-05	-0.459299	-0.113378	NA	-0.108817	-0.220365	-0.147918	-0.275293	-0.499494	-0.441685	-0.528308	NA	-0.391407	NA	0.052146	0.298115	-0.269881	-0.594636	-0.713901	-0.841098	NA	NA	1	1	2	28
chr9:136857298-136857366	MAMDC4	0.0319112	NA	NA	NA	NA	NA	NA	0.00016066	-0.347333	NA	0.381728	0.619884	0.135676	0.601534	NA	NA	NA	NA	NA	-0.0145875	NA	NA	NA	NA	NA	NA	-0.464008	-0.716774	NA	0.409366	NA	NA	NA	1	2	3	11
chr7:98981960-98983263	TRRAP	NA	NA	NA	NA	NA	NA	NA	NA	NA	NA	NA	NA	NA	-0.00826406	NA	NA	NA	NA	NA	NA	NA	NA	NA	NA	NA	NA	NA	NA	NA	NA	NA	NA	NA	1	0	1	1
chr10:97468406-97468965	MMS19	NA	NA	NA	NA	0.384756	NA	NA	0.917008	0.269644	NA	NA	0.0260349	-0.0794134	-0.341075	NA	NA	-0.45795	-0.119577	NA	-0.00547352	NA	0.980546	NA	NA	-0.189774	NA	0.306834	NA	NA	NA	NA	NA	NA	1	1	2	12
chr11:6544246-6544573	DNHD1	NA	NA	NA	NA	NA	NA	NA	NA	NA	NA	NA	NA	NA	-0.0448268	NA	NA	NA	NA	NA	NA	NA	NA	NA	NA	NA	NA	NA	NA	NA	NA	NA	NA	NA	1	0	1	1
chr5:32591685-32598960	SUB1	NA	NA	NA	NA	NA	NA	NA	NA	NA	NA	NA	NA	NA	-0.00096212	NA	NA	NA	NA	NA	NA	NA	NA	NA	NA	NA	NA	NA	NA	NA	NA	NA	NA	NA	1	0	1	1
chr19:49663514-49664673	IRF3	-0.0813273	-0.0785208	-0.240643	0.317129	-0.203987	0.420543	0.37012	-0.600696	-0.536998	NA	-0.603153	0.126784	-0.281568	-0.0195845	0.554259	-0.34696	-0.373652	0.748858	0.474964	NA	-0.010071	0.270116	0.0816733	-0.411375	-0.0839164	-0.575301	-0.530482	0.82813	0.173952	-0.406813	0.240985	NA	-0.462038	2	0	2	30
chr15:28233561-28233663	HERC2	NA	NA	NA	NA	NA	NA	NA	NA	NA	NA	NA	NA	NA	-0.0260093	NA	NA	NA	NA	NA	NA	NA	NA	NA	NA	NA	NA	NA	NA	NA	NA	NA	NA	NA	1	0	1	1
chr16:3774693-3777612	CREBBP	NA	NA	NA	NA	NA	NA	NA	NA	NA	NA	NA	NA	NA	-0.0413795	NA	NA	NA	NA	NA	NA	NA	NA	NA	NA	NA	NA	NA	NA	NA	NA	NA	NA	NA	1	0	1	1
chr9:134036324-134040033	BRD3	NA	NA	NA	NA	NA	NA	NA	NA	NA	NA	NA	NA	NA	-0.0449018	NA	NA	NA	NA	NA	NA	NA	NA	NA	NA	NA	NA	NA	NA	NA	NA	NA	NA	NA	1	0	1	1
chr2:25759645-25767582	ASXL2	NA	NA	NA	NA	NA	NA	NA	NA	NA	NA	NA	NA	NA	-0.0248268	NA	NA	NA	NA	NA	NA	NA	NA	NA	NA	NA	NA	NA	NA	NA	NA	NA	NA	NA	1	0	1	1
chr3:47418843-47419327	SCAP	NA	NA	NA	NA	NA	NA	NA	NA	NA	NA	NA	NA	NA	-0.00969495	NA	NA	NA	NA	NA	NA	NA	NA	NA	NA	NA	NA	NA	NA	NA	NA	NA	NA	NA	1	0	1	1
chr2:10396920-10408561	HPCAL1	NA	NA	NA	NA	NA	NA	NA	NA	NA	NA	NA	NA	NA	-0.00115035	NA	NA	NA	NA	NA	NA	NA	NA	NA	NA	NA	NA	NA	NA	NA	NA	NA	NA	NA	1	0	1	1
chr2:237577382-237578003	RAB17	NA	NA	-0.00899921	NA	0.733645	0.310385	NA	-0.413928	NA	NA	NA	0.00461126	0.480812	NA	NA	0.448154	0.0979895	NA	0.0465324	0.161349	-0.445182	NA	0.0728927	0.296774	NA	0.502889	0.182753	NA	0.302088	NA	NA	NA	0.84168	1	2	3	17
chr2:27024297-27025582	MAPRE3	-0.830397	-0.0130742	0.45709	-0.660944	0.0889647	NA	NA	0.287707	-0.768837	NA	-0.286001	0.383297	-0.341543	NA	-0.45911	NA	-0.57225	-0.257959	0.662693	0.246219	0.158752	NA	0.14693	-0.581616	NA	0.539836	-0.0525803	-0.202576	-0.391205	0.634612	NA	-0.863267	NA	1	0	1	24
chr9:35737939-35738036	GBA2	0.711269	0.00341561	0.441108	0.0677864	-0.109098	0.212658	-0.656197	0.908196	0.204468	-0.721474	-0.339078	0.0443151	0.0764278	-0.0627874	0.0884179	-0.886423	0.545902	0.267977	0.081475	0.616749	0.136927	-0.849973	-0.0398351	0.444403	-0.00435013	-0.335102	0.070224	-0.573676	-0.321279	-0.324825	-0.596653	0.152438	0.30587	2	2	4	33
chr20:49094286-49094731	CSE1L	NA	NA	NA	NA	NA	NA	NA	NA	NA	NA	NA	NA	NA	-0.013025	NA	NA	NA	NA	NA	NA	NA	NA	NA	NA	NA	NA	NA	NA	NA	NA	NA	NA	NA	1	0	1	1
chr11:118521417-118521896	KMT2A	NA	NA	NA	NA	NA	NA	NA	NA	NA	NA	NA	NA	NA	-0.0349355	NA	NA	NA	NA	NA	NA	NA	NA	NA	NA	NA	NA	NA	NA	NA	NA	NA	NA	NA	1	0	1	1
chr2:38343512-38377142	ATL2	NA	NA	NA	NA	NA	NA	NA	NA	NA	NA	NA	NA	NA	-0.0139084	NA	NA	NA	NA	NA	NA	NA	NA	NA	NA	NA	NA	NA	NA	NA	NA	NA	NA	NA	1	0	1	1
chr22:30406385-30407094	SEC14L2	NA	NA	NA	NA	NA	NA	NA	0.00553282	NA	NA	NA	NA	NA	NA	NA	NA	NA	NA	NA	NA	NA	NA	NA	NA	NA	NA	NA	NA	NA	NA	NA	NA	NA	0	1	1	1
chr3:179576726-179576823	ACTL6A	NA	NA	NA	NA	NA	NA	NA	NA	NA	NA	NA	NA	NA	NA	-0.0126519	NA	NA	NA	NA	NA	NA	NA	NA	NA	NA	NA	NA	NA	NA	NA	NA	-0.480229	NA	1	0	1	2
chr14:73192864-73198030	PSEN1	NA	NA	NA	NA	NA	NA	NA	NA	NA	NA	NA	NA	NA	-0.0112999	NA	NA	NA	NA	NA	NA	NA	NA	NA	NA	NA	NA	NA	NA	NA	NA	NA	NA	NA	1	0	1	1
chr11:47168251-47171425	ARFGAP2	NA	-0.101002	NA	NA	NA	NA	NA	-0.508247	NA	NA	NA	0.00119069	0.196778	-0.00438796	NA	NA	-0.434518	NA	NA	NA	NA	NA	NA	NA	NA	NA	0.204452	NA	NA	NA	NA	NA	NA	1	1	2	7
chr17:81246673-81246884	SLC38A10	-0.0224323	-0.112978	0.639725	0.456338	0.0353941	0.158536	0.440905	0.0147598	-0.04857	-0.329448	0.704636	0.00040434	-0.509522	-0.393372	-0.0584824	0.272154	0.0993268	-0.373493	0.00568661	-0.122045	-0.118549	0.218156	0.0135877	0.105451	0.337507	0.129591	-0.191479	0.73358	NA	0.914187	0.203672	0.4443	0.572976	2	5	7	32
chr19:1418731-1421147	DAZAP1	NA	NA	NA	NA	NA	NA	NA	NA	NA	NA	NA	NA	NA	-0.00197835	NA	NA	NA	NA	NA	NA	NA	NA	NA	NA	NA	NA	NA	NA	NA	NA	NA	NA	NA	1	0	1	1
chrX:100679412-100681226	SYTL4	NA	NA	0.223819	NA	NA	NA	NA	-0.335839	0.0113683	NA	NA	NA	NA	NA	0.144237	NA	NA	NA	NA	NA	0.393779	NA	NA	NA	NA	NA	0.853767	NA	NA	NA	NA	NA	NA	0	1	1	6
chr21:32317065-32317675	URB1	NA	NA	NA	NA	NA	NA	NA	NA	NA	NA	NA	NA	NA	-0.00074767	NA	NA	NA	NA	NA	NA	NA	NA	NA	NA	NA	NA	NA	NA	NA	NA	NA	NA	NA	1	0	1	1
chr6:31144788-31144884	CCHCR1	-0.747654	-0.151191	0.623569	-0.563782	0.193175	0.482597	0.130036	-0.278836	0.309254	0.643774	NA	7.073e-05	-0.555888	-0.640767	0.0109395	-0.036867	-0.536035	0.787549	-0.28468	0.586884	-0.155524	NA	0.266047	0.520799	-0.0719786	0.0998512	-0.318165	-0.71856	0.258636	-0.187104	-0.271925	0.173973	-0.376904	1	2	3	31
chr10:27197442-27204439	ACBD5	NA	NA	NA	NA	NA	NA	NA	NA	NA	NA	NA	NA	NA	-0.0242244	NA	NA	NA	NA	NA	NA	NA	NA	NA	NA	NA	NA	NA	NA	NA	NA	NA	NA	NA	1	0	1	1
chrX:129447301-129448301	SMARCA1	-0.723727	NA	NA	NA	NA	NA	NA	NA	NA	NA	NA	NA	NA	NA	0.0765787	0.245584	NA	NA	0.621255	NA	NA	0.971375	0.202397	NA	NA	NA	NA	NA	0.0429766	NA	NA	0.475187	NA	0	1	1	8
chr1:26761473-26762151	ARID1A	NA	NA	NA	NA	NA	NA	NA	NA	NA	NA	NA	NA	NA	-0.00496856	NA	NA	NA	NA	NA	NA	NA	NA	NA	NA	NA	NA	NA	NA	NA	NA	NA	NA	NA	1	0	1	1
chr19:49862738-49863688	PNKP	NA	NA	NA	NA	NA	NA	NA	NA	NA	NA	NA	NA	NA	-0.0305911	NA	NA	NA	NA	NA	NA	NA	NA	NA	NA	NA	NA	NA	NA	NA	NA	NA	NA	NA	1	0	1	1
chr16:88898152-88901503	CBFA2T3	NA	NA	NA	NA	NA	NA	NA	NA	NA	NA	NA	NA	NA	-0.0371499	NA	NA	NA	NA	NA	NA	NA	NA	NA	NA	NA	NA	NA	NA	NA	NA	NA	NA	NA	1	0	1	1
chr21:44086960-44087698	TRAPPC10	NA	NA	NA	NA	NA	NA	NA	NA	NA	NA	NA	NA	NA	-0.0127962	NA	NA	NA	NA	NA	NA	NA	NA	NA	NA	NA	NA	NA	NA	NA	NA	NA	NA	NA	1	0	1	1
chr9:132353755-132354916	SETX	NA	NA	NA	NA	NA	NA	NA	NA	NA	NA	NA	NA	NA	-0.0182154	NA	NA	NA	NA	NA	NA	NA	NA	NA	NA	NA	NA	NA	NA	NA	NA	NA	NA	NA	1	0	1	1
chr16:3029739-3030448	BICDL2	NA	-0.0314553	-0.0558556	-0.490944	0.0124922	-0.233265	NA	-0.633192	NA	-0.728589	NA	NA	NA	NA	NA	NA	0.638684	-0.289601	NA	0.776238	-0.0272376	NA	0.0272078	-0.0126792	NA	NA	-0.144578	NA	0.475502	NA	0.683503	NA	NA	3	2	5	16
chr8:107303367-107321898	ANGPT1	NA	NA	NA	NA	NA	NA	NA	NA	NA	NA	NA	NA	NA	-0.0461186	NA	NA	NA	NA	NA	NA	NA	NA	NA	NA	NA	NA	NA	NA	NA	NA	NA	NA	NA	1	0	1	1
chr17:1009784-1010728	ABR	NA	NA	NA	NA	NA	NA	NA	NA	NA	NA	NA	NA	-0.0712894	-0.0013614	NA	NA	NA	NA	NA	NA	NA	NA	NA	NA	NA	NA	NA	NA	NA	NA	NA	NA	NA	1	0	1	2
chr19:18765528-18768484	CRTC1	NA	NA	NA	NA	NA	NA	NA	NA	NA	NA	NA	NA	NA	-0.00241776	NA	NA	NA	NA	NA	NA	NA	NA	NA	NA	NA	NA	NA	NA	NA	NA	NA	NA	NA	1	0	1	1
chr2:74506057-74506180	PCGF1	-0.559746	0.136989	NA	0.155144	-0.85466	0.250523	0.364977	0.468253	-0.56675	NA	NA	0.00172337	-0.104413	-0.636288	0.216625	-0.045094	0.3588	0.183694	-0.447414	NA	-0.429165	NA	NA	-0.131713	-0.62543	0.379221	0.810724	0.566087	NA	NA	-0.10768	NA	NA	1	1	2	23
chr9:35741890-35744296	GBA2	-0.778686	-0.649	-0.00282667	0.47769	-0.496993	0.459489	NA	0.630048	0.292885	NA	-0.53613	6.362e-05	0.0822351	-0.0157053	-0.63246	-0.807549	0.702213	-0.69873	0.0183832	-0.263285	-0.201145	-0.634196	0.0111266	-0.0547881	0.251592	-0.585876	-0.401612	0.909747	-0.866864	-0.227945	NA	0.369649	-0.781906	2	3	5	30
chr15:90232327-90233668	CIB1	NA	-0.213493	NA	NA	NA	NA	NA	NA	NA	NA	NA	NA	NA	-0.0296099	NA	NA	NA	NA	NA	NA	NA	NA	NA	NA	NA	NA	NA	NA	NA	NA	NA	NA	NA	1	0	1	2
chrX:14914599-14915667	MOSPD2	NA	NA	NA	NA	NA	NA	NA	0.373251	NA	NA	NA	NA	NA	-0.0110738	NA	NA	NA	NA	NA	NA	NA	NA	NA	NA	NA	NA	NA	NA	NA	NA	NA	NA	NA	1	0	1	2
chr18:12009987-12012169	IMPA2	NA	NA	NA	NA	NA	NA	NA	NA	NA	NA	NA	NA	0.317202	-0.00183783	NA	NA	NA	NA	NA	NA	NA	NA	NA	NA	NA	NA	NA	NA	NA	NA	NA	NA	NA	1	0	1	2
chr16:22326278-22328509	POLR3E	NA	-0.333838	-0.225526	-0.136301	-0.0822258	0.201675	0.209461	-0.38612	-0.808142	NA	-0.597147	0.339955	-0.610166	-0.173101	-0.716306	NA	-0.308983	-0.666486	0.112103	-0.860342	-0.0193667	0.24955	0.0161681	-0.411231	NA	-0.0163759	0.391492	-0.183152	0.197435	0.330795	NA	NA	NA	2	1	3	26
chr20:36771473-36773393	DSN1	NA	NA	NA	0.424134	NA	NA	NA	0.0238688	NA	NA	NA	NA	NA	NA	NA	NA	NA	-0.594578	NA	-0.196114	NA	NA	NA	NA	NA	NA	0.353162	NA	NA	NA	NA	NA	NA	0	1	1	5
chr2:27449031-27449293	IFT172	NA	NA	NA	NA	NA	NA	NA	0.500117	-0.0909098	NA	NA	0.813462	-0.752769	-0.153021	NA	NA	NA	NA	NA	-0.49	NA	NA	NA	NA	NA	NA	0.0241019	0.468214	NA	NA	NA	0.217926	NA	0	1	1	9
chr2:24310380-24310488	ITSN2	NA	NA	NA	NA	NA	NA	NA	NA	NA	NA	NA	NA	NA	-0.0473332	NA	NA	NA	NA	NA	NA	NA	NA	NA	NA	NA	NA	NA	NA	NA	NA	NA	NA	NA	1	0	1	1
chr17:42669621-42669917	PLEKHH3	-0.228654	-0.156977	-0.0208551	0.10739	0.0162708	NA	NA	-0.30516	0.784249	0.772132	NA	0.00719678	0.490147	NA	-0.326546	0.229416	-0.0898839	0.179437	0.629488	-0.625933	0.150023	0.529259	0.28184	0.372512	-0.0941878	0.773624	0.217264	-0.490892	0.0717085	-0.116844	0.00846879	0.32997	NA	1	3	4	28
chr1:28536899-28537831	RCC1	NA	NA	NA	NA	NA	NA	NA	NA	NA	NA	NA	NA	NA	-0.0442963	NA	NA	NA	NA	NA	NA	NA	NA	NA	NA	NA	NA	NA	NA	NA	NA	NA	NA	NA	1	0	1	1
chr10:86446449-86451966	WAPL	NA	NA	NA	NA	NA	NA	NA	NA	NA	NA	NA	NA	NA	-0.0237952	NA	NA	NA	NA	NA	NA	NA	NA	NA	NA	NA	NA	NA	NA	NA	NA	NA	NA	NA	1	0	1	1
chr22:50507035-50507581	LMF2	-0.343093	-0.102431	-0.199525	-0.116961	-0.0980043	0.0202499	0.168536	0.468171	-0.689582	-0.563191	0.676422	0.0158522	-0.831818	-0.0236549	-0.660153	0.0441232	0.0980666	-0.348605	0.57429	-0.0435941	-0.786135	0.543161	0.053086	-0.350545	0.0454022	0.386286	0.177684	0.372858	-0.0877511	0.116444	NA	-0.84131	-0.112904	2	4	6	32
chr12:26916180-26917351	INTS13	NA	NA	NA	NA	NA	NA	NA	NA	NA	NA	NA	NA	NA	-0.0290974	NA	NA	NA	NA	NA	NA	NA	NA	NA	NA	NA	NA	NA	NA	NA	NA	NA	NA	NA	1	0	1	1
chr17:7559893-7560048	TNFSF12-TNFSF13	NA	NA	NA	NA	NA	NA	-0.800569	-0.558898	NA	NA	NA	NA	NA	-0.00960911	-0.00366896	NA	NA	-0.134772	NA	NA	NA	NA	NA	NA	NA	NA	NA	-0.179568	NA	-0.675651	NA	-0.418086	NA	2	0	2	8
chr14:103467191-103468080	MARK3	0.233027	-0.161653	-0.528891	0.675033	-0.46347	NA	0.597527	0.393954	-0.67025	0.46064	0.945801	0.00069277	-0.147314	-0.104828	0.052137	NA	0.24314	-0.0108037	0.551331	0.0475083	-0.502135	NA	-0.262594	NA	-0.0732631	-0.630734	0.405341	0.356513	0.108028	0.0315562	-0.598492	0.0532859	NA	1	3	4	28
chr8:56309027-56312156	SDR16C5	NA	NA	NA	NA	NA	NA	NA	0.172826	NA	NA	NA	NA	NA	NA	NA	NA	-0.023187	NA	NA	NA	NA	NA	NA	NA	NA	NA	NA	NA	NA	NA	NA	NA	NA	1	0	1	2
chr10:68014186-68025545	HERC4	NA	NA	NA	NA	NA	NA	NA	NA	NA	NA	NA	NA	NA	-1.347e-05	NA	NA	NA	NA	NA	NA	NA	NA	NA	NA	NA	NA	NA	NA	NA	NA	NA	NA	NA	1	0	1	1
chr20:62857638-62859363	TCFL5	NA	NA	NA	NA	NA	NA	NA	0.540978	NA	NA	NA	NA	NA	-0.0403981	NA	NA	NA	NA	NA	NA	NA	NA	NA	NA	NA	NA	0.59727	NA	NA	NA	NA	NA	NA	1	0	1	3
chr1:205985665-205992479	RAB7B	NA	NA	NA	NA	NA	NA	NA	NA	NA	NA	NA	NA	NA	-0.0222575	NA	NA	NA	NA	NA	NA	NA	NA	NA	NA	NA	NA	NA	NA	NA	NA	NA	NA	NA	1	0	1	1
chrX:147940662-147943130	FMR1	NA	NA	NA	NA	NA	NA	NA	NA	NA	NA	NA	NA	NA	-0.0401309	NA	NA	NA	NA	NA	NA	NA	NA	NA	NA	NA	NA	NA	NA	NA	NA	NA	NA	NA	1	0	1	1
chr1:19185286-19186539	UBR4	NA	NA	NA	NA	NA	NA	NA	NA	NA	NA	NA	NA	NA	-0.0231621	NA	NA	NA	NA	NA	NA	NA	NA	NA	NA	NA	NA	NA	NA	NA	NA	NA	NA	NA	1	0	1	1
chr3:9941026-9941110	CRELD1	NA	NA	NA	NA	NA	NA	NA	0.533027	-0.32051	NA	NA	NA	NA	0.00780643	-0.260253	NA	NA	NA	NA	NA	NA	NA	NA	NA	NA	NA	-0.203929	NA	NA	NA	NA	NA	NA	0	1	1	5
chr2:238171024-238173533	ILKAP	NA	NA	NA	NA	NA	NA	NA	0.490315	NA	NA	NA	0.134838	NA	-0.00244104	NA	NA	NA	NA	NA	-0.479266	NA	NA	NA	NA	NA	NA	0.39186	NA	NA	NA	NA	NA	NA	1	0	1	5
chr16:20475773-20477368	ACSM2A	NA	NA	NA	NA	NA	NA	NA	NA	NA	NA	NA	-0.0459603	0.288749	NA	NA	0.315723	NA	NA	NA	NA	NA	NA	NA	NA	NA	NA	NA	NA	NA	NA	NA	NA	NA	1	0	1	3
chr12:57202537-57203180	LRP1	NA	NA	NA	-0.126374	NA	NA	NA	NA	NA	NA	NA	0.0360704	NA	NA	NA	0.566777	-0.548435	0.659572	NA	NA	-0.354782	NA	NA	NA	NA	NA	NA	NA	NA	NA	NA	-0.626112	NA	0	1	1	7
chr14:105466742-105468337	MTA1	NA	NA	NA	0.197798	NA	NA	0.183483	-0.791521	NA	NA	NA	NA	NA	-0.315149	0.61395	NA	NA	-0.387893	NA	-0.643084	0.0644228	NA	0.031962	NA	NA	NA	-0.412614	NA	NA	0.21443	-0.487364	NA	NA	0	1	1	12
chr16:67660045-67660121	ACD	-0.427861	0.0340233	-0.79527	0.311286	NA	0.131452	0.145501	0.0974411	0.625437	-0.0573674	0.248973	0.367105	0.540469	NA	0.00102945	NA	-0.698255	-0.647557	-0.0808246	-0.445554	0.485807	0.424658	-0.110056	0.423923	0.404234	-0.461475	0.164353	-0.431333	NA	NA	NA	0.153363	NA	0	2	2	26
chr10:6113068-6113507	RBM17	-0.186363	-0.0436619	-0.108723	0.450641	-0.801269	NA	0.382492	0.483204	0.165081	NA	NA	0.461029	-0.0756177	-0.475706	0.362967	NA	NA	-0.157358	-0.338732	0.828289	-0.199731	-0.940327	NA	NA	-0.574891	0.610366	-0.376937	-0.0784965	-0.769341	0.634661	NA	0.159387	NA	1	0	1	24
chr5:95516750-95516915	TTC37	NA	NA	NA	NA	NA	NA	NA	-0.551925	NA	NA	NA	0.00564136	NA	-0.601251	NA	NA	NA	NA	NA	-0.234217	NA	NA	NA	NA	NA	NA	-0.515419	NA	NA	NA	NA	NA	NA	0	1	1	5
chr12:50678876-50680671	DIP2B	NA	NA	NA	NA	NA	NA	NA	0.512983	NA	NA	NA	NA	NA	-0.0364087	NA	NA	NA	NA	NA	NA	NA	NA	NA	NA	NA	NA	NA	NA	NA	NA	NA	NA	NA	1	0	1	2
chr1:153638448-153642242	CHTOP	NA	NA	-0.475989	NA	NA	NA	NA	-0.871496	NA	NA	NA	0.0154285	-0.776491	-0.126502	NA	NA	-0.0143818	0.759384	NA	NA	-0.569677	NA	NA	NA	NA	NA	-0.829449	NA	NA	NA	NA	NA	NA	1	1	2	9
chr22:38739426-38739721	SUN2	-0.605386	-0.439508	NA	-0.416262	-0.684331	0.485352	0.393594	0.31712	NA	NA	NA	NA	-0.821726	-0.556342	NA	NA	0.367175	-0.412659	NA	-0.244073	-0.0222969	0.589227	NA	0.378365	NA	-0.32942	-0.176348	-0.449995	-0.350333	NA	-0.24107	0.246981	NA	1	0	1	21
chr17:64514358-64519320	CEP95	NA	NA	-0.189565	NA	NA	NA	NA	0.165328	NA	NA	NA	0.0103516	NA	-0.467071	NA	NA	NA	NA	NA	-0.51266	NA	NA	NA	NA	NA	NA	0.885674	NA	NA	NA	NA	NA	NA	0	1	1	6
chr9:133106016-133106644	AL162417.1	NA	NA	NA	NA	NA	NA	NA	NA	NA	NA	NA	NA	NA	-0.0111351	NA	NA	NA	NA	NA	NA	NA	NA	NA	NA	NA	NA	NA	NA	NA	NA	NA	NA	NA	1	0	1	1
chr19:5587980-5590277	SAFB2	NA	NA	-0.047494	NA	NA	NA	NA	-0.602469	-0.493774	NA	NA	0.474112	NA	-0.914047	NA	NA	0.489573	0.180606	NA	NA	0.11895	NA	NA	NA	NA	-0.303605	0.266713	NA	NA	NA	NA	NA	NA	1	0	1	10
chr9:136886541-136898712	TRAF2	NA	NA	NA	NA	NA	NA	NA	0.231807	NA	NA	NA	NA	NA	0.581695	NA	NA	NA	NA	NA	NA	NA	NA	NA	NA	NA	NA	-0.0205057	NA	NA	NA	NA	NA	NA	1	0	1	3
chr11:72825407-72826172	ATG16L2	NA	NA	NA	NA	NA	NA	NA	NA	NA	NA	NA	NA	NA	-0.0309187	NA	NA	NA	NA	NA	NA	NA	NA	NA	NA	NA	NA	NA	NA	NA	NA	NA	NA	NA	1	0	1	1
chr11:68929357-68933298	IGHMBP2	NA	NA	NA	NA	NA	NA	NA	0.123615	NA	NA	NA	NA	NA	-0.192402	NA	NA	NA	NA	NA	NA	NA	NA	0.715453	NA	NA	NA	0.00814018	NA	NA	NA	NA	NA	NA	0	1	1	4
chr7:74220734-74221636	LAT2	NA	NA	NA	NA	NA	NA	0.109998	NA	NA	NA	NA	NA	NA	-0.00054176	NA	NA	NA	NA	NA	NA	NA	NA	NA	NA	NA	NA	NA	NA	NA	NA	NA	NA	NA	1	0	1	2
chr9:111374038-111375112	ECPAS	0.308214	NA	NA	NA	NA	NA	NA	NA	NA	NA	-0.592853	0.00504017	NA	-0.263672	NA	NA	NA	0.177935	NA	NA	NA	0.436143	NA	NA	NA	NA	NA	NA	0.634109	NA	NA	NA	NA	0	1	1	7
chr9:134911267-134912485	FCN1	NA	NA	NA	NA	NA	NA	NA	NA	NA	NA	NA	NA	NA	-0.0291721	NA	NA	NA	NA	NA	NA	NA	NA	NA	NA	NA	NA	NA	NA	NA	NA	NA	NA	NA	1	0	1	1
chr7:75043109-75052710	RCC1L	NA	NA	NA	NA	NA	NA	NA	NA	NA	NA	NA	NA	NA	-0.00044712	NA	NA	NA	NA	NA	NA	NA	NA	NA	NA	NA	NA	NA	NA	NA	NA	NA	NA	NA	1	0	1	1
chr7:55983868-55984846	NIPSNAP2	NA	NA	NA	NA	NA	NA	NA	NA	NA	NA	NA	NA	NA	-0.00046041	NA	NA	NA	NA	NA	NA	NA	NA	NA	NA	NA	NA	NA	NA	NA	NA	NA	NA	NA	1	0	1	1
chr2:202894626-202896064	WDR12	NA	NA	NA	NA	NA	NA	NA	0.0426185	NA	NA	NA	NA	NA	-0.647495	NA	NA	NA	NA	NA	0.775303	NA	NA	NA	NA	NA	-0.388723	-0.236807	NA	NA	NA	NA	NA	NA	0	1	1	5
chr11:534375-535415	HRAS	NA	-0.278418	NA	0.0305241	0.513926	NA	NA	0.125255	NA	-0.18281	NA	NA	NA	NA	NA	NA	NA	0.697484	NA	-0.624966	NA	NA	NA	NA	NA	NA	0.134295	NA	NA	0.262716	NA	NA	NA	0	1	1	9
chr4:48505615-48510058	FRYL	NA	NA	NA	NA	NA	NA	NA	0.012392	NA	NA	NA	0.00147419	NA	-0.0119879	NA	NA	NA	NA	NA	NA	NA	NA	NA	NA	NA	NA	0.297344	NA	NA	NA	NA	NA	NA	1	2	3	4
chr20:32429431-32429900	ASXL1	NA	-0.19186	-0.00369275	-0.372387	0.132303	0.304987	NA	0.465312	-0.281456	-0.672692	-0.470122	0.0194983	0.148672	-0.034021	0.135677	NA	0.263052	-0.0883023	0.351053	-0.444538	-0.314531	0.998676	0.00849305	0.675059	0.373712	-0.323435	0.69438	-0.22563	0.776063	NA	NA	-0.500326	-0.897925	2	2	4	28
chr20:49233709-49234934	DDX27	-0.245082	NA	NA	NA	NA	NA	NA	NA	-0.276529	NA	NA	0.183248	-0.14447	-0.0173404	-0.477226	NA	-0.0299898	NA	NA	NA	NA	0.25382	NA	NA	NA	NA	0.327522	NA	NA	NA	NA	NA	NA	2	0	2	9
chr12:112419125-112446275	PTPN11	NA	NA	NA	NA	NA	NA	NA	NA	NA	NA	NA	NA	NA	-0.009042	NA	NA	NA	NA	NA	NA	NA	NA	NA	NA	NA	NA	NA	NA	NA	NA	NA	NA	NA	1	0	1	1
chr19:5846564-5851389	FUT3	NA	NA	NA	NA	NA	0.0306629	NA	0.0639213	NA	NA	NA	NA	NA	NA	NA	NA	NA	NA	NA	NA	-0.156122	NA	NA	-0.0887711	NA	NA	-0.656391	NA	NA	NA	NA	NA	NA	0	1	1	5
chr20:45802057-45803332	DNTTIP1	NA	NA	NA	NA	NA	NA	NA	NA	NA	NA	NA	NA	NA	-0.0187239	NA	NA	NA	NA	NA	NA	NA	NA	NA	NA	NA	NA	NA	NA	NA	NA	NA	NA	NA	1	0	1	1
chr7:1476071-1476228	INTS1	NA	NA	NA	NA	NA	NA	NA	NA	NA	NA	NA	NA	NA	-0.00485462	NA	NA	NA	NA	NA	NA	NA	NA	NA	NA	NA	NA	NA	NA	NA	NA	NA	NA	NA	1	0	1	1
chr19:21033582-21034085	ZNF430	NA	NA	NA	NA	NA	NA	NA	NA	NA	NA	NA	NA	NA	-0.0237889	NA	NA	NA	NA	NA	NA	NA	NA	NA	NA	NA	NA	NA	NA	NA	NA	NA	NA	NA	1	0	1	1
chr1:168191500-168196546	TIPRL	NA	NA	NA	NA	NA	NA	NA	NA	NA	NA	NA	NA	NA	-0.00475354	NA	NA	NA	NA	NA	NA	NA	NA	NA	NA	NA	NA	NA	NA	NA	NA	NA	NA	NA	1	0	1	1
chr2:27035285-27035593	TMEM214	0.48371	-0.646461	NA	-0.393028	0.747326	0.0752842	-0.319964	NA	-0.233388	NA	NA	0.0339834	-0.301829	-0.0725137	0.634547	NA	-0.684337	0.321672	-0.30617	NA	-0.0913698	0.141039	NA	-0.769244	-0.697802	0.838414	NA	-0.731508	-0.171246	NA	NA	-0.206765	NA	0	1	1	22
chr9:35075754-35075961	FANCG	NA	-0.00382392	NA	0.115671	-0.128423	NA	0.552165	0.14229	-0.126269	NA	NA	NA	NA	-0.0460047	NA	NA	NA	0.524845	NA	0.531356	NA	NA	NA	-0.737909	0.175083	-0.250584	0.0639235	-0.347818	NA	-0.339744	NA	0.482374	NA	2	0	2	16
chr6:149535738-149540941	PPIL4	NA	NA	NA	NA	NA	NA	NA	NA	NA	NA	NA	NA	NA	-0.00993891	NA	NA	NA	NA	NA	NA	NA	NA	NA	NA	NA	NA	NA	NA	NA	NA	NA	NA	NA	1	0	1	1
chr16:1459187-1460417	CLCN7	-0.301277	-0.96624	-0.0094129	-0.176381	-0.296803	0.0991592	0.270469	0.353449	0.243373	0.364494	0.417296	0.0720043	-0.0193496	-0.118893	0.261339	-0.369739	0.190827	-0.0640662	0.332264	0.504431	-0.492151	-0.857769	0.400849	0.202651	0.704556	0.133468	-0.466702	-0.310713	-0.264427	-0.327665	NA	-0.00549954	0.887359	3	0	3	32
chr20:3037289-3038058	PTPRA	NA	NA	NA	NA	NA	NA	NA	NA	NA	NA	NA	NA	NA	-0.0029946	NA	NA	NA	NA	NA	NA	NA	NA	NA	NA	NA	NA	NA	NA	NA	NA	NA	NA	NA	1	0	1	1
chr2:24758156-24762686	NCOA1	NA	NA	NA	NA	NA	NA	NA	NA	NA	NA	NA	NA	NA	-0.00797618	NA	NA	NA	NA	NA	NA	NA	NA	NA	NA	NA	NA	NA	NA	NA	NA	NA	NA	NA	1	0	1	1
chr9:121144959-121145243	CNTRL	NA	NA	NA	NA	NA	NA	NA	NA	NA	NA	NA	NA	NA	-0.0194174	NA	NA	NA	NA	NA	NA	NA	NA	NA	NA	NA	NA	NA	NA	NA	NA	NA	NA	NA	1	0	1	1
chr13:46728984-46733920	LRCH1	NA	NA	NA	NA	NA	NA	NA	NA	NA	NA	NA	NA	NA	-0.00014359	NA	NA	NA	NA	NA	NA	NA	NA	NA	NA	NA	NA	NA	NA	NA	NA	NA	NA	NA	1	0	1	1
chr5:172770306-172770585	DUSP1	-0.0704627	-0.246465	-0.0864535	0.0230458	0.735243	-0.369198	NA	-0.19402	-0.0413554	-0.194878	0.321914	-0.0211885	0.409757	-0.0189465	0.8147	-0.183965	0.206024	-0.170702	-0.373344	-0.204525	-0.147743	-0.73132	0.0183625	0.406134	-0.599167	NA	NA	-0.179083	0.319828	0.181363	NA	-0.278739	NA	3	2	5	28
chr12:89599299-89601325	ATP2B1	NA	NA	NA	NA	NA	NA	NA	NA	NA	NA	NA	NA	NA	-0.0238187	NA	NA	NA	NA	NA	NA	NA	NA	NA	NA	NA	NA	NA	NA	NA	NA	NA	NA	NA	1	0	1	1
chr17:76733215-76733292	METTL23	-0.439245	-0.0543422	NA	-0.72996	0.362287	0.370379	0.101831	0.26269	NA	NA	NA	0.0655753	-0.895775	-0.0205049	0.563184	0.131748	-0.190746	0.841967	0.969649	NA	-0.119469	0.999062	0.260085	0.393344	NA	0.382431	-0.21109	0.679106	-0.319779	0.379915	0.592599	0.208775	0.678956	1	0	1	27
chr6:166366891-166370217	MPC1	NA	NA	NA	NA	0.471589	NA	0.999039	0.215602	-0.453324	NA	NA	0.00149207	-0.16634	-0.0872905	NA	NA	-0.219631	NA	NA	NA	NA	NA	0.553446	NA	NA	NA	-0.224138	NA	NA	-0.153302	NA	NA	NA	0	1	1	11
chr11:126267335-126267548	SRPRA	0.719491	-0.219668	-0.149672	-0.0647973	0.202472	0.447888	-0.282148	NA	-0.841428	-0.583214	-0.416288	0.0121796	0.952297	-0.505414	-0.00442773	-0.757041	-0.252629	0.653485	NA	NA	-0.242562	-0.344169	0.00806906	0.458177	-0.32454	0.54951	NA	-0.698826	-0.284647	0.0361935	-0.875409	-0.42148	-0.0803168	1	3	4	29
chr22:50455142-50455223	SBF1	-0.028346	-0.104482	-0.170133	-0.574821	0.697334	0.194139	NA	NA	NA	NA	-0.46775	0.00050778	-0.639329	-0.042573	NA	NA	-0.0445344	-0.186027	NA	NA	-0.460582	0.999086	-0.367821	-0.359878	NA	NA	NA	0.645542	NA	-0.0111383	0.150501	NA	NA	4	1	5	19
chr19:16530674-16530768	CHERP	NA	NA	NA	NA	NA	NA	NA	NA	NA	NA	NA	NA	NA	-0.0319392	NA	NA	NA	NA	NA	NA	NA	NA	NA	NA	NA	NA	NA	NA	NA	NA	NA	NA	NA	1	0	1	1
chr8:123810351-123812518	FAM91A1	NA	-0.017004	-0.367133	0.927254	0.37396	0.0238944	0.793655	-0.803333	-0.243077	-0.126156	0.248321	-0.0588061	-0.615868	-0.16876	0.00016689	-0.448373	-0.0480118	0.437661	-0.430802	-0.550618	-0.0618769	-0.321644	0.068046	0.195403	-0.0280508	-0.247342	0.0817275	0.686878	0.366853	NA	NA	0.237036	NA	3	2	5	29
chr19:1941418-1969507	CSNK1G2	NA	NA	NA	NA	NA	NA	NA	NA	NA	NA	NA	NA	NA	-0.0204774	NA	NA	NA	NA	NA	NA	NA	NA	NA	NA	NA	NA	NA	NA	NA	NA	NA	NA	NA	1	0	1	1
chr5:178209447-178210552	HNRNPAB	NA	NA	NA	NA	NA	NA	NA	NA	NA	NA	NA	0.00651368	-0.280878	-0.00028456	NA	NA	NA	NA	NA	NA	NA	NA	NA	NA	NA	NA	NA	NA	NA	NA	NA	NA	NA	1	1	2	3
chr16:29799494-29799627	KIF22	NA	NA	NA	NA	NA	NA	NA	NA	NA	NA	NA	NA	NA	-0.0396446	NA	NA	NA	NA	NA	NA	NA	NA	NA	NA	NA	NA	NA	NA	NA	NA	NA	NA	NA	1	0	1	1
chr16:15696860-15724190	NDE1	NA	NA	NA	NA	NA	NA	NA	NA	NA	NA	NA	NA	NA	-0.00011646	NA	NA	NA	NA	NA	NA	NA	NA	NA	NA	NA	NA	NA	NA	NA	NA	NA	NA	NA	1	0	1	1
chr16:31182422-31182512	FUS	NA	NA	NA	NA	NA	NA	NA	NA	NA	NA	NA	NA	NA	-0.0376786	NA	NA	NA	NA	NA	NA	NA	NA	NA	NA	NA	NA	NA	NA	NA	NA	NA	NA	NA	1	0	1	1
chr22:40951476-40953554	RBX1	NA	NA	NA	NA	NA	NA	NA	NA	NA	NA	NA	NA	NA	-0.00195401	NA	NA	NA	NA	NA	NA	NA	NA	NA	NA	NA	NA	NA	NA	NA	NA	NA	NA	NA	1	0	1	1
chr3:64517121-64522165	ADAMTS9	NA	NA	NA	NA	NA	NA	NA	NA	NA	NA	NA	0.0425489	-0.0590806	NA	NA	NA	NA	NA	NA	NA	NA	NA	NA	NA	NA	NA	NA	NA	NA	NA	NA	NA	NA	0	1	1	2
chr7:87182337-87184396	DMTF1	NA	NA	NA	NA	NA	NA	NA	NA	NA	NA	NA	NA	NA	-0.00099314	NA	NA	NA	NA	NA	NA	NA	NA	NA	NA	NA	NA	NA	NA	NA	NA	NA	NA	NA	1	0	1	1
chr21:33525000-33528166	GART	NA	NA	NA	NA	NA	NA	NA	NA	NA	NA	NA	NA	NA	-0.0394899	NA	NA	NA	NA	NA	NA	NA	NA	NA	NA	NA	NA	NA	NA	NA	NA	NA	NA	NA	1	0	1	1
chr11:67281952-67282270	GRK2	NA	-0.103077	NA	NA	NA	NA	NA	0.228108	NA	NA	NA	0.00438542	-0.674205	-0.00087096	NA	NA	NA	NA	NA	NA	NA	-0.492599	NA	NA	NA	NA	-0.193378	0.989832	NA	NA	NA	NA	NA	1	1	2	8
chr5:69114496-69115236	SLC30A5	NA	NA	NA	NA	NA	NA	NA	NA	0.230441	NA	NA	NA	NA	-0.0483223	-0.0266812	NA	NA	NA	NA	NA	NA	NA	NA	NA	NA	NA	NA	NA	NA	NA	NA	NA	NA	2	0	2	3
chr17:80110055-80110726	GAA	-0.18215	-0.0878739	-0.0385439	NA	0.877706	NA	-0.548825	NA	-0.733046	NA	-0.640371	0.00336961	0.753414	-0.704359	-0.0563626	NA	NA	0.268203	NA	NA	-0.0683617	0.234583	0.00112946	NA	0.329042	0.661089	NA	-0.351662	-0.282671	0.394115	NA	-0.195284	NA	1	2	3	21
chr16:368635-369067	MRPL28	NA	-0.0597343	NA	NA	-0.771166	NA	NA	NA	NA	NA	NA	NA	NA	-0.0227859	NA	NA	NA	NA	NA	NA	NA	NA	NA	NA	NA	NA	NA	-0.0660545	NA	NA	NA	NA	NA	1	0	1	4
chr14:34516586-34524696	EAPP	NA	NA	NA	NA	NA	NA	NA	NA	NA	NA	NA	NA	NA	-0.0376973	NA	NA	NA	NA	NA	NA	NA	NA	NA	NA	NA	NA	NA	NA	NA	NA	NA	NA	NA	1	0	1	1
chr7:100057405-100057697	ZSCAN21	NA	NA	0.132938	NA	NA	NA	NA	0.499477	-0.590057	NA	NA	NA	-0.0998844	0.547148	-0.62858	NA	NA	NA	NA	-0.404553	NA	-0.999069	0.0199642	NA	NA	NA	-0.395205	NA	0.588666	0.314783	NA	NA	NA	0	1	1	12
chr3:48765349-48772954	PRKAR2A	NA	NA	NA	NA	NA	NA	NA	NA	NA	NA	NA	NA	NA	-0.0371356	NA	NA	NA	NA	NA	NA	NA	NA	NA	NA	NA	NA	NA	NA	NA	NA	NA	NA	NA	1	0	1	1
chr13:114250674-114257077	CDC16	NA	NA	NA	NA	NA	NA	NA	NA	NA	NA	NA	NA	NA	-0.037083	NA	NA	NA	NA	NA	NA	NA	NA	NA	NA	NA	NA	NA	NA	NA	NA	NA	NA	NA	1	0	1	1
chr5:180564743-180565819	CNOT6	NA	NA	NA	NA	NA	NA	NA	-0.350964	NA	NA	NA	NA	NA	-0.0223448	NA	NA	NA	NA	NA	NA	NA	NA	NA	NA	NA	NA	0.198708	NA	NA	NA	NA	NA	NA	1	0	1	3
chr6:127282395-127286049	RNF146	NA	NA	NA	NA	NA	NA	NA	0.555762	-0.101655	NA	NA	NA	NA	-0.00512032	-0.199248	NA	NA	NA	NA	NA	NA	NA	NA	NA	NA	NA	-0.210944	NA	0.620916	NA	NA	NA	NA	1	0	1	6
chr14:105252579-105256517	BRF1	NA	NA	NA	NA	NA	NA	NA	NA	NA	NA	NA	NA	NA	-1.271e-05	NA	NA	NA	NA	NA	NA	NA	NA	NA	NA	NA	NA	NA	NA	NA	NA	NA	NA	NA	1	0	1	1
chr6:143857444-143857751	LTV1	0.371568	0.705947	-0.0210699	-0.475235	-0.542487	0.629545	-0.238755	-0.318016	-0.337802	-0.012798	NA	0.00014557	-0.194136	-0.00044123	-0.54771	NA	-0.085199	0.454949	-0.484472	0.628151	-0.397719	0.243673	0.0256049	0.0718625	-0.0520455	0.752442	-0.174064	-0.589224	0.54384	0.654139	NA	-0.650867	NA	3	2	5	29
chr12:56325128-56325334	PAN2	-0.385477	NA	NA	NA	NA	NA	NA	0.458965	NA	NA	NA	0.00150015	-0.121599	0.58564	-0.124898	NA	NA	NA	NA	-0.769372	NA	NA	NA	NA	NA	NA	-0.254849	NA	NA	NA	NA	NA	NA	0	1	1	8
chr1:39563922-39564470	PABPC4	NA	NA	NA	NA	NA	NA	NA	-0.540546	0.513441	NA	NA	0.0276004	NA	0.579628	-0.19816	NA	NA	NA	NA	NA	NA	NA	NA	NA	NA	NA	NA	NA	NA	NA	NA	NA	NA	0	1	1	5
chr6:32188796-32189694	PBX2	-0.110557	-0.712295	-0.185275	-0.305514	-0.145613	0.363319	0.362157	-0.333196	0.491355	-0.0295608	0.437064	0.00258681	0.592103	-0.706971	0.00583558	0.231879	0.531058	-0.2763	0.0976998	0.40732	-0.570607	0.71243	0.0633118	0.165505	0.00500259	0.125255	0.0478769	-0.573874	0.891777	-0.361906	0.368509	0.054297	0.322767	1	4	5	33
chrX:18897333-18901484	PHKA2	NA	NA	NA	NA	NA	NA	NA	0.859459	NA	NA	NA	0.00977162	NA	-0.0567447	NA	NA	NA	NA	NA	-0.441341	NA	NA	0.126613	NA	NA	NA	NA	NA	NA	NA	NA	NA	NA	0	1	1	5
chr11:64369893-64370224	RPS6KA4	NA	-0.635473	NA	0.964975	0.593748	NA	-0.550566	NA	-0.372259	NA	NA	0.588288	-0.0482192	-0.940202	-0.348051	NA	-0.386605	-0.191513	-0.304555	-0.811069	-0.361072	NA	-0.388991	NA	NA	0.154607	NA	NA	NA	0.407164	NA	-0.283061	NA	1	0	1	18
chr14:95436966-95439032	SYNE3	NA	NA	NA	NA	NA	NA	NA	NA	NA	NA	NA	NA	NA	-0.00154947	NA	NA	NA	NA	NA	NA	NA	NA	NA	NA	NA	NA	NA	NA	NA	NA	NA	NA	NA	1	0	1	1
chr7:158734471-158735502	ESYT2	NA	NA	NA	NA	NA	NA	NA	NA	NA	NA	NA	NA	NA	-0.00774119	NA	NA	NA	NA	NA	NA	NA	NA	NA	NA	NA	NA	NA	NA	NA	NA	NA	NA	NA	1	0	1	1
chr17:75613209-75613292	MYO15B	NA	NA	NA	NA	NA	-0.669691	NA	0.496923	NA	NA	NA	0.113948	NA	-0.00146047	NA	NA	NA	NA	NA	NA	NA	NA	NA	-0.682168	NA	NA	-0.135042	NA	NA	NA	NA	NA	NA	1	0	1	6
chr17:78093124-78093619	TNRC6C	NA	NA	NA	NA	NA	NA	NA	NA	NA	NA	NA	NA	NA	NA	0.0265166	NA	NA	NA	NA	NA	NA	NA	NA	NA	NA	NA	NA	NA	NA	NA	NA	NA	NA	0	1	1	1
chr12:113114912-113115199	RASAL1	0.060511	NA	NA	0.021727	NA	NA	NA	-0.486487	NA	NA	NA	NA	NA	NA	NA	NA	NA	NA	NA	-0.133803	NA	NA	NA	NA	NA	NA	0.352296	NA	NA	NA	NA	NA	NA	0	1	1	5
chr1:43666555-43666953	KDM4A	NA	NA	NA	NA	NA	NA	NA	NA	NA	NA	NA	NA	NA	-0.00150514	NA	NA	NA	NA	NA	NA	NA	NA	NA	NA	NA	NA	NA	NA	NA	NA	NA	NA	NA	1	0	1	1
chr19:6825121-6825302	VAV1	NA	NA	NA	NA	NA	NA	NA	NA	NA	NA	NA	NA	NA	-0.00364471	NA	NA	NA	NA	NA	NA	NA	NA	NA	NA	NA	NA	NA	NA	NA	NA	NA	NA	NA	1	0	1	1
chr22:50526141-50526245	TYMP	NA	-0.250522	-0.212379	-0.0139873	-0.0538896	0.122092	NA	NA	0.135322	-0.744781	NA	0.122692	-0.086471	-0.00046767	NA	0.0122475	-0.219004	-0.252427	0.203461	0.0457648	-0.523313	NA	0.326055	NA	0.00814831	0.0541402	NA	-0.201622	NA	-0.482374	0.141615	0.0754813	NA	2	3	5	23
chr15:70679676-70682757	UACA	NA	NA	-0.27264	NA	NA	NA	NA	0.400681	NA	NA	NA	0.00416739	NA	NA	NA	NA	NA	NA	NA	NA	-0.0771058	NA	NA	NA	NA	NA	-0.444081	0.868213	-0.545509	NA	NA	NA	NA	0	1	1	7
chr14:24428405-24428754	CBLN3	-0.573161	NA	NA	NA	NA	NA	NA	NA	NA	NA	NA	0.0301054	NA	NA	NA	NA	NA	NA	NA	-0.505586	NA	NA	NA	NA	NA	NA	NA	NA	NA	NA	NA	NA	NA	0	1	1	3
chr12:111446854-111446941	SH2B3	NA	NA	NA	NA	NA	NA	NA	0.28023	NA	NA	NA	0.00124246	NA	-0.00140292	NA	NA	NA	NA	NA	-0.596765	NA	NA	NA	NA	NA	NA	0.0896524	NA	NA	NA	NA	NA	NA	1	1	2	5
chr12:26659285-26663684	ITPR2	NA	NA	NA	NA	NA	NA	NA	NA	NA	NA	NA	NA	NA	-0.0185276	NA	NA	NA	NA	NA	NA	NA	NA	NA	NA	NA	NA	NA	NA	NA	NA	NA	NA	NA	1	0	1	1
chr12:122478292-122480189	ZCCHC8	NA	NA	NA	-0.866499	NA	NA	NA	-0.246532	0.289562	NA	NA	0.0689375	NA	-0.269873	NA	NA	-0.101082	-0.034748	NA	0.268453	NA	NA	NA	NA	NA	NA	0.396316	-0.315563	NA	NA	NA	NA	NA	1	0	1	10
chr6:43052796-43053621	CUL7	NA	NA	NA	NA	NA	NA	NA	0.0206439	NA	NA	NA	NA	NA	NA	NA	NA	NA	NA	NA	-0.3643	NA	NA	NA	NA	NA	NA	0.587719	NA	NA	NA	NA	NA	NA	0	1	1	3
chr3:138699095-138704442	PIK3CB	NA	NA	NA	NA	NA	NA	NA	NA	NA	NA	NA	NA	NA	-0.0110613	NA	NA	NA	NA	NA	NA	NA	NA	NA	NA	NA	NA	NA	NA	NA	NA	NA	NA	NA	1	0	1	1
chr3:17167828-17185108	TBC1D5	NA	NA	NA	NA	NA	NA	NA	NA	NA	NA	NA	NA	NA	-0.00165533	NA	NA	NA	NA	NA	NA	NA	NA	NA	NA	NA	NA	NA	NA	NA	NA	NA	NA	NA	1	0	1	1
chr15:61856409-61863439	VPS13C	NA	NA	NA	NA	NA	NA	NA	0.22094	NA	NA	NA	0.0017744	NA	-0.758141	-0.486174	NA	-0.112324	NA	NA	-0.0606059	0.204925	NA	NA	NA	NA	NA	0.117144	NA	NA	NA	NA	NA	NA	0	1	1	8
chr3:14416453-14443623	SLC6A6	NA	NA	NA	NA	NA	NA	NA	NA	NA	NA	NA	NA	NA	-0.0130691	NA	NA	NA	NA	NA	NA	NA	NA	NA	NA	NA	NA	NA	NA	NA	NA	NA	NA	NA	1	0	1	1
chrX:149937480-149938141	EOLA2	0.100035	-0.00047519	0.183406	-0.393673	-0.524501	NA	0.201897	-0.0697077	0.700479	-0.281442	-0.0472174	0.381378	-0.283262	NA	-0.886901	NA	0.620203	-0.316717	-0.434338	-0.410988	-0.0474384	NA	0.286015	0.0821588	0.0540341	0.579592	0.752027	0.409993	0.282371	-0.299573	NA	-0.786349	NA	3	0	3	27
chr2:219055865-219057432	IHH	NA	NA	NA	NA	NA	0.0201942	NA	NA	NA	NA	NA	NA	NA	NA	NA	NA	NA	NA	NA	NA	NA	NA	NA	0.452233	NA	NA	-0.351129	NA	NA	NA	NA	NA	NA	0	1	1	3
chr13:21521327-21522602	MICU2	NA	NA	NA	NA	NA	NA	NA	NA	NA	NA	NA	NA	NA	-0.0322742	NA	NA	NA	NA	NA	NA	NA	NA	NA	NA	NA	NA	NA	NA	NA	NA	NA	NA	NA	1	0	1	1
chr9:114360062-114361703	AKNA	NA	NA	NA	NA	NA	NA	NA	NA	NA	NA	NA	NA	NA	-0.0277336	NA	NA	NA	NA	NA	NA	NA	NA	NA	NA	NA	NA	NA	NA	NA	NA	NA	NA	NA	1	0	1	1
chr12:131941983-131943538	PUS1	NA	NA	NA	NA	NA	NA	NA	0.976755	NA	NA	NA	NA	NA	-0.00123447	NA	NA	NA	NA	NA	0.79311	NA	NA	NA	NA	NA	NA	-0.265216	NA	NA	NA	NA	NA	NA	1	0	1	4
chr6:41637273-41638139	MDFI	NA	NA	NA	-0.00587714	NA	NA	NA	NA	NA	0.88917	NA	NA	NA	NA	NA	NA	NA	NA	NA	NA	NA	NA	NA	NA	NA	NA	NA	NA	NA	NA	NA	NA	NA	1	0	1	2
chr1:1284090-1285925	SCNN1D	NA	NA	NA	NA	NA	NA	NA	NA	-0.265655	NA	NA	NA	NA	NA	0.0160568	NA	NA	NA	NA	-0.219432	NA	NA	NA	NA	NA	NA	NA	NA	NA	NA	NA	NA	NA	0	1	1	3
chr19:9156748-9157267	ZNF317	NA	NA	NA	0.636762	NA	NA	-0.227339	0.110645	NA	NA	NA	3.341e-05	NA	-0.619229	NA	NA	NA	0.146818	NA	0.755236	NA	NA	NA	NA	NA	NA	0.425037	-0.216914	NA	NA	NA	NA	NA	0	1	1	9
chr19:43776636-43780702	KCNN4	NA	NA	NA	NA	NA	NA	NA	0.303663	NA	NA	NA	NA	NA	-0.00597755	NA	NA	NA	NA	NA	NA	NA	NA	NA	NA	NA	NA	NA	NA	NA	NA	NA	NA	NA	1	0	1	2
chr14:58215284-58219693	ACTR10	NA	NA	NA	NA	NA	NA	NA	NA	NA	NA	NA	NA	NA	-0.00328359	NA	NA	NA	NA	NA	NA	NA	NA	NA	NA	NA	NA	NA	NA	NA	NA	NA	NA	NA	1	0	1	1
chr16:77212369-77212573	SYCE1L	NA	0.110269	NA	0.471494	0.386401	NA	0.277936	0.656905	0.580616	NA	NA	-0.446958	0.203302	NA	NA	NA	0.156139	NA	-0.220188	-0.113287	-0.0340251	0.996338	0.362237	NA	0.296464	NA	-0.465882	-0.443507	0.768415	-0.0614715	0.140687	-0.838753	-0.279193	1	0	1	22
chr1:32038619-32039514	KHDRBS1	NA	NA	NA	NA	NA	NA	NA	NA	NA	NA	NA	NA	NA	-0.0305608	NA	NA	NA	NA	NA	NA	NA	NA	NA	NA	NA	NA	NA	NA	NA	NA	NA	NA	NA	1	0	1	1
chr21:26840061-26840275	ADAMTS1	NA	NA	NA	NA	-0.612264	NA	NA	-0.471066	NA	NA	NA	4.4e-07	-0.713224	NA	NA	NA	NA	-0.493567	-0.36226	0.420731	-0.446556	-0.975986	0.00388861	NA	-0.746722	NA	-0.158743	NA	-0.321236	NA	NA	0.166156	NA	0	2	2	14
chr2:27085008-27085159	EMILIN1	NA	-0.0237495	0.488435	-0.62341	0.321403	NA	0.0722621	0.604641	-0.148105	NA	-0.558196	-0.00955887	-0.0822717	NA	-2e-08	0.110964	-0.187005	-0.0664799	-0.154242	-0.0447922	NA	0.426437	NA	NA	NA	-0.0409519	-0.0129962	0.530567	-0.285828	0.896676	NA	NA	-0.0540091	6	0	6	23
chr1:161056532-161059613	ARHGAP30	NA	NA	NA	NA	NA	NA	NA	NA	NA	NA	NA	NA	NA	-0.0202619	NA	NA	NA	NA	NA	NA	NA	NA	NA	NA	NA	NA	NA	NA	NA	NA	NA	NA	NA	1	0	1	1
chr16:30660442-30661179	FBRS	-0.546559	-0.220463	-0.0041489	0.248148	0.192691	NA	NA	NA	-0.872164	NA	-0.753951	0.0172417	-0.198141	-0.0691752	-0.231255	NA	-0.310391	-0.20765	-0.314761	NA	-0.0351455	0.319618	0.163079	0.68669	NA	-0.381069	NA	NA	0.807014	NA	NA	NA	NA	2	1	3	20
chr20:34926951-34927086	ACSS2	NA	NA	NA	NA	NA	NA	NA	NA	NA	NA	NA	NA	NA	-0.0197006	NA	NA	NA	NA	NA	NA	NA	NA	NA	NA	NA	NA	NA	NA	NA	NA	NA	NA	NA	1	0	1	1
chr7:17340228-17342920	AHR	NA	-0.0960887	NA	NA	NA	NA	NA	NA	NA	NA	NA	0.00520732	0.288378	-0.0939284	NA	NA	NA	NA	NA	NA	NA	NA	NA	NA	NA	NA	NA	NA	NA	NA	NA	NA	NA	0	1	1	4
chr19:1622415-1623950	TCF3	NA	NA	NA	NA	NA	NA	NA	NA	NA	NA	NA	NA	NA	-0.0215329	NA	NA	NA	NA	NA	NA	NA	NA	NA	NA	NA	NA	NA	NA	NA	NA	NA	NA	NA	1	0	1	1
chr4:158710670-158710761	PPID	-0.579018	-0.302462	-0.118827	-0.432571	0.380278	NA	NA	-0.109668	NA	-0.0522318	-0.2835	-0.0991471	-0.0722557	-0.637767	0.0681748	-0.0580125	-0.0395826	NA	-0.257704	-0.576653	-0.0734506	-0.903836	-0.344264	0.347139	-0.0217925	-0.102693	0.363379	-0.920478	-0.494506	-0.224577	-0.439526	0.104928	NA	2	0	2	28
chr22:31606430-31607936	SFI1	NA	NA	-0.24769	NA	0.152575	NA	0.261006	-0.641316	NA	NA	NA	0.0375952	0.202915	-0.566516	NA	NA	NA	-0.252713	NA	0.53701	-0.505283	NA	NA	NA	NA	NA	0.436655	NA	0.0727675	-0.413219	NA	NA	NA	0	1	1	13
chr16:69318942-69319386	AC026464.4	NA	NA	NA	NA	NA	NA	NA	NA	NA	NA	NA	NA	0.465796	-0.0419825	NA	NA	NA	NA	NA	NA	NA	NA	NA	NA	NA	NA	NA	NA	NA	NA	NA	NA	NA	1	0	1	2
chr19:49601918-49614532	PRR12	NA	NA	NA	NA	NA	NA	NA	NA	NA	NA	NA	NA	NA	-0.0101549	NA	NA	NA	NA	NA	NA	NA	NA	NA	NA	NA	NA	NA	NA	NA	NA	NA	NA	NA	1	0	1	1
chr3:13373873-13375503	NUP210	NA	NA	NA	NA	NA	NA	NA	NA	NA	NA	NA	NA	NA	-0.00403339	NA	NA	NA	NA	NA	NA	NA	NA	NA	NA	NA	NA	NA	NA	NA	NA	NA	NA	NA	1	0	1	1
chr19:45143633-45144853	PPP1R37	NA	NA	NA	NA	NA	NA	NA	NA	NA	NA	NA	NA	NA	-0.00687516	NA	NA	NA	NA	NA	NA	NA	NA	NA	NA	NA	NA	NA	NA	NA	NA	NA	NA	NA	1	0	1	1
chr3:47419704-47420553	SCAP	NA	NA	NA	NA	NA	NA	NA	NA	NA	NA	NA	NA	NA	-0.00199887	NA	NA	NA	NA	NA	NA	NA	NA	NA	NA	NA	NA	NA	NA	NA	NA	NA	NA	NA	1	0	1	1
chr11:74810330-74817595	RNF169	NA	NA	NA	NA	NA	NA	NA	0.392611	NA	NA	NA	NA	NA	-0.0122637	NA	NA	NA	NA	NA	NA	NA	NA	NA	NA	NA	NA	NA	NA	NA	NA	NA	NA	NA	1	0	1	2
chr7:65974704-65974918	GUSB	-0.537086	-0.0347461	-0.71567	-0.0881157	0.47333	-0.383112	-0.331198	0.143118	-0.386725	-0.485238	-0.662578	0.0224821	0.846066	-0.2275	-0.0182882	0.0465861	-0.77474	-0.228406	-0.0801469	-0.607245	-0.135476	-0.567757	0.00536102	-0.36987	-0.395884	0.859622	0.341321	0.650483	-0.201956	0.356548	0.407366	0.69065	0.592985	2	3	5	33
chr11:62803978-62805328	NXF1	NA	NA	NA	NA	NA	NA	NA	NA	NA	NA	NA	NA	NA	-0.00156789	NA	NA	NA	NA	NA	NA	NA	NA	NA	NA	NA	NA	NA	NA	NA	NA	NA	NA	NA	1	0	1	1
chr17:45396790-45396915	ARHGAP27	NA	NA	NA	NA	NA	NA	NA	NA	NA	NA	NA	NA	NA	-0.00014337	NA	NA	NA	NA	NA	NA	NA	NA	NA	NA	NA	NA	-0.525993	NA	NA	NA	NA	NA	NA	1	0	1	2
chr12:120579923-120581114	POP5	-0.417295	-0.0127048	-0.445464	0.606848	0.862613	-0.629125	0.520479	0.115689	0.151556	NA	NA	0.0311984	-0.798535	-0.0344191	0.33226	NA	-0.332481	0.201686	-0.341028	0.423949	-0.0206864	0.476719	NA	-0.213337	-0.487537	0.390517	-0.620824	-0.293541	0.675639	0.761399	0.418325	-0.455134	NA	3	1	4	28
chr12:124778586-124782682	SCARB1	-0.0970935	NA	NA	NA	NA	NA	-0.685701	NA	0.830342	NA	NA	0.0787951	-0.0470083	-0.887516	0.0255438	NA	NA	0.695347	NA	NA	0.381561	0.242058	NA	NA	0.140752	NA	NA	-0.2073	NA	NA	NA	-0.518667	-0.533625	1	1	2	14
chr15:44563301-44564546	SPG11	0.0200953	0.302231	0.0112732	0.443311	-0.456589	-0.962765	-0.841474	-0.0700526	-0.783991	-0.341036	0.277239	6.11e-06	-0.412046	0.962865	-0.0473128	0.497218	-0.0776288	-0.416973	0.0013468	0.320175	-0.0718099	0.783357	0.0688344	-0.221745	0.0419806	0.0490083	0.0873585	0.654705	0.344309	-0.186666	0.788178	0.908507	-0.379006	1	6	7	33
chr10:103174982-103181184	NT5C2	NA	NA	NA	NA	NA	NA	NA	0.0237404	NA	NA	NA	NA	NA	-0.502182	NA	NA	NA	NA	NA	NA	NA	NA	NA	NA	NA	NA	-0.719436	NA	NA	NA	NA	NA	NA	0	1	1	3
chrX:103678620-103684680	MORF4L2	NA	NA	-0.272031	NA	NA	NA	NA	0.126333	0.31634	NA	NA	NA	NA	NA	NA	NA	-0.0127713	0.521733	NA	0.354271	NA	NA	NA	NA	NA	NA	-0.420531	NA	NA	NA	NA	NA	NA	1	0	1	7
chr16:11721670-11730644	TXNDC11	NA	NA	NA	NA	NA	NA	NA	NA	NA	NA	NA	NA	NA	-0.0303546	NA	NA	NA	NA	NA	NA	NA	NA	NA	NA	NA	NA	NA	NA	NA	NA	NA	NA	NA	1	0	1	1
chr2:200882435-200885697	PPIL3	NA	NA	NA	NA	0.164392	NA	NA	0.421474	0.177705	NA	NA	0.0016689	NA	0.212996	0.235723	NA	-0.498148	NA	NA	NA	NA	NA	NA	NA	NA	NA	0.25948	NA	0.0957537	NA	NA	NA	NA	0	1	1	9
chr9:128720283-128720393	PKN3	NA	NA	NA	NA	NA	NA	NA	0.0129815	NA	NA	NA	NA	NA	-0.299471	NA	NA	NA	NA	NA	0.23276	NA	NA	NA	NA	NA	NA	-0.234288	NA	NA	NA	NA	NA	NA	0	1	1	4
chr22:50418979-50419348	PPP6R2	NA	NA	NA	NA	NA	NA	NA	NA	NA	NA	NA	NA	NA	-0.00131506	NA	NA	NA	NA	NA	NA	NA	NA	NA	NA	NA	NA	NA	NA	NA	NA	NA	NA	NA	1	0	1	1
chr2:229880128-229921879	TRIP12	NA	NA	NA	NA	NA	NA	NA	NA	NA	NA	NA	NA	NA	-0.0273693	NA	NA	NA	NA	NA	NA	NA	NA	NA	NA	NA	NA	NA	NA	NA	NA	NA	NA	NA	1	0	1	1
chr3:184303466-184303642	PSMD2	NA	NA	NA	NA	NA	NA	NA	NA	NA	NA	NA	NA	NA	-0.016741	NA	NA	NA	NA	NA	NA	NA	NA	NA	NA	NA	NA	NA	NA	NA	NA	NA	NA	NA	1	0	1	1
chr7:100474440-100477276	TSC22D4	NA	NA	NA	NA	NA	NA	NA	NA	NA	NA	NA	NA	NA	-0.00236927	NA	NA	NA	NA	NA	NA	NA	NA	NA	NA	NA	NA	NA	NA	NA	NA	NA	NA	NA	1	0	1	1
chr12:22458585-22459491	C2CD5	NA	NA	0.795582	NA	-0.386577	NA	NA	0.0606689	NA	NA	NA	0.0436056	NA	NA	0.0324523	NA	NA	NA	NA	NA	0.0954201	0.36275	NA	NA	NA	NA	0.0215824	-0.743063	-0.699894	NA	NA	NA	NA	0	3	3	10
chr1:235753274-235755477	LYST	NA	NA	NA	NA	NA	NA	NA	NA	NA	NA	NA	NA	NA	-0.0307878	NA	NA	NA	NA	NA	NA	NA	NA	NA	NA	NA	NA	NA	NA	NA	NA	NA	NA	NA	1	0	1	1
chr17:29115840-29116443	MYO18A	NA	NA	NA	NA	NA	NA	NA	NA	NA	NA	NA	NA	NA	-0.0282966	NA	NA	NA	NA	NA	NA	NA	NA	NA	NA	NA	NA	NA	NA	NA	NA	NA	NA	NA	1	0	1	1
chr17:8803429-8804040	PIK3R6	NA	NA	NA	NA	NA	NA	NA	NA	NA	NA	NA	NA	NA	-0.00216638	NA	NA	NA	NA	NA	NA	NA	NA	NA	NA	NA	NA	NA	NA	NA	NA	NA	NA	NA	1	0	1	1
chr17:29583616-29589326	GIT1	NA	NA	NA	NA	NA	NA	NA	NA	NA	NA	NA	NA	NA	-0.0220993	NA	NA	NA	NA	NA	NA	NA	NA	NA	NA	NA	NA	NA	NA	NA	NA	NA	NA	NA	1	0	1	1
chr2:9388546-9391061	ASAP2	NA	NA	NA	NA	NA	NA	NA	0.00297062	NA	NA	NA	NA	NA	NA	NA	NA	NA	NA	NA	-0.861507	NA	NA	NA	NA	NA	NA	0.349541	NA	NA	NA	NA	NA	NA	0	1	1	3
chr2:130157396-130161185	SMPD4	-0.498964	-0.569297	-0.0759596	0.195768	-0.48511	0.0971483	0.27058	0.160263	0.699255	0.270257	-0.543509	0.0447674	-0.0514189	-0.00876056	-0.576535	NA	0.341538	0.943773	-0.344886	NA	-0.0581268	0.155247	0.0427323	0.131034	-0.595077	0.71251	-0.849998	-0.516565	-0.546317	0.12855	-0.0498296	0.250839	-0.523667	2	2	4	31
chr2:96808742-96809319	CNNM4	NA	NA	NA	NA	NA	NA	NA	NA	NA	NA	NA	NA	NA	-0.0147097	NA	NA	NA	NA	NA	-0.156194	NA	NA	NA	NA	NA	NA	NA	NA	NA	NA	NA	NA	NA	1	0	1	2
chr21:15874526-15877795	USP25	NA	NA	NA	NA	NA	NA	NA	NA	NA	NA	NA	NA	NA	-0.0168112	NA	NA	NA	NA	NA	NA	NA	NA	NA	NA	NA	NA	NA	NA	NA	NA	NA	NA	NA	1	0	1	1
chr3:51944578-51944777	PARP3	-0.112577	-0.646719	0.0304442	-0.403759	0.570252	0.700386	0.682623	-0.113564	0.786723	NA	-0.594678	0.233302	-0.128603	-0.340403	0.598726	-0.509262	-0.60321	-0.106845	0.103248	-0.39994	-0.112935	0.460859	0.0517136	0.151099	0.211175	-0.533369	-0.140815	NA	-0.269248	-0.326549	NA	NA	0.760966	0	1	1	29
chrX:118599228-118605237	DOCK11	NA	NA	NA	NA	NA	NA	NA	NA	NA	NA	NA	NA	NA	-0.00704262	NA	NA	NA	NA	NA	NA	NA	NA	NA	NA	NA	NA	NA	NA	NA	NA	NA	NA	NA	1	0	1	1
chr14:20406400-20407872	TEP1	NA	NA	NA	NA	NA	NA	NA	0.027636	NA	NA	NA	NA	NA	-0.00010605	NA	NA	NA	NA	NA	NA	NA	NA	NA	NA	NA	NA	0.279374	NA	NA	NA	NA	NA	NA	1	1	2	3
chr20:34921139-34921329	ACSS2	0.975719	NA	NA	-0.22345	0.333823	0.635766	NA	0.285254	-0.109216	NA	NA	6.68e-06	0.779045	-0.0108745	0.259	0.0954245	-0.817523	0.290183	NA	-0.310142	-0.0752022	NA	NA	0.0703504	NA	0.144455	-0.266768	NA	NA	NA	NA	0.449855	NA	1	1	2	19
chr16:84759472-84759890	USP10	NA	NA	NA	NA	NA	NA	NA	NA	NA	NA	NA	NA	NA	-0.00462211	NA	NA	NA	NA	NA	NA	NA	NA	NA	NA	NA	NA	NA	NA	NA	NA	NA	NA	NA	1	0	1	1
chr6:33195702-33195906	RXRB	-0.443153	-0.0912475	-0.169811	-0.139823	0.183207	0.0294147	0.497452	0.304293	0.372821	0.484565	0.338271	0.00019911	0.318544	-0.219828	0.281321	0.243976	0.19573	-0.135858	0.291999	0.541593	0.743778	0.225837	0.00039247	0.38501	-0.181687	0.528904	0.496676	0.590625	0.625989	0.366207	0.6277	-0.447522	0.632947	0	3	3	33
chr8:38107166-38110378	ASH2L	NA	NA	NA	NA	NA	NA	NA	NA	NA	NA	NA	NA	NA	-0.0447048	NA	NA	NA	NA	NA	NA	NA	NA	NA	NA	NA	NA	NA	NA	NA	NA	NA	NA	NA	1	0	1	1
chr20:35007640-35008663	TRPC4AP	NA	NA	NA	NA	NA	NA	NA	-0.343275	NA	NA	NA	NA	NA	-0.0129015	NA	NA	NA	NA	NA	NA	NA	NA	NA	NA	NA	NA	-0.786935	NA	NA	NA	NA	NA	NA	1	0	1	3
chr3:9760768-9761460	CAMK1	NA	0.239764	0.645344	-0.417164	-0.127864	NA	0.596848	-0.876725	NA	NA	-0.874363	NA	-0.280438	-0.401093	NA	NA	-0.419018	-0.218316	NA	-0.333971	0.135292	NA	NA	NA	NA	-0.259118	-0.614616	-0.950017	NA	-0.0402989	NA	0.330385	NA	1	0	1	18
chr17:42659552-42659833	TUBG2	NA	-0.0288729	NA	-0.794599	0.788395	NA	NA	0.136661	-0.342368	NA	NA	0.0918622	0.363104	NA	0.0220035	NA	-0.674515	-0.0114084	NA	-0.185801	NA	0.398363	NA	NA	0.392814	0.48433	0.429575	0.565061	NA	NA	NA	NA	NA	2	1	3	16
chr3:49812543-49813061	UBA7	NA	NA	NA	NA	NA	NA	NA	NA	NA	NA	NA	NA	NA	-0.0479748	NA	NA	NA	NA	NA	NA	NA	NA	NA	NA	NA	NA	NA	NA	NA	NA	NA	NA	NA	1	0	1	1
chr17:74766976-74768146	SLC9A3R1	NA	NA	NA	NA	NA	NA	NA	NA	NA	NA	NA	NA	NA	-0.00180487	NA	NA	NA	NA	NA	NA	NA	NA	NA	NA	NA	NA	NA	NA	NA	NA	NA	NA	NA	1	0	1	1
chr18:9937066-9950394	VAPA	NA	NA	NA	NA	NA	NA	NA	NA	NA	NA	NA	NA	NA	-0.00080171	NA	NA	NA	NA	NA	NA	NA	NA	NA	NA	NA	NA	NA	NA	NA	NA	NA	NA	NA	1	0	1	1
chr2:108771871-108772488	RANBP2	NA	NA	NA	NA	NA	NA	NA	NA	NA	NA	NA	NA	NA	-0.00952202	NA	NA	NA	NA	NA	NA	NA	NA	NA	NA	NA	NA	NA	NA	NA	NA	NA	NA	NA	1	0	1	1
chr17:19555309-19555592	SLC47A1	0.508716	NA	NA	NA	NA	NA	NA	NA	NA	NA	NA	0.0118503	0.276769	NA	NA	NA	NA	NA	NA	NA	NA	NA	NA	NA	NA	NA	NA	NA	NA	NA	NA	NA	NA	0	1	1	3
chr12:131755479-131756472	SFSWAP	NA	NA	NA	NA	NA	NA	NA	NA	NA	NA	NA	NA	NA	-0.0343769	NA	NA	NA	NA	NA	NA	NA	NA	NA	NA	NA	NA	NA	NA	NA	NA	NA	NA	NA	1	0	1	1
chr20:63284922-63285653	ARFGAP1	NA	NA	NA	NA	NA	NA	NA	0.395409	NA	NA	NA	NA	NA	-0.00013356	NA	NA	NA	NA	NA	0.344196	NA	NA	NA	NA	NA	NA	NA	NA	NA	NA	NA	NA	NA	1	0	1	3
chr20:47283648-47287228	ZMYND8	NA	NA	NA	NA	NA	NA	NA	NA	NA	NA	NA	NA	NA	-0.0454556	NA	NA	NA	NA	NA	NA	NA	NA	NA	NA	NA	NA	NA	NA	NA	NA	NA	NA	NA	1	0	1	1
chr19:1816569-1816697	REXO1	NA	NA	NA	NA	NA	NA	NA	NA	NA	NA	NA	NA	NA	-0.0265576	NA	NA	NA	NA	NA	NA	NA	NA	NA	NA	NA	NA	NA	NA	NA	NA	NA	NA	NA	1	0	1	1
chr19:35049391-35049474	HPN	NA	NA	-0.0711119	NA	-0.0569493	NA	NA	NA	NA	NA	0.494465	0.00011446	0.342755	NA	NA	0.0508355	-0.306794	NA	NA	-0.496017	NA	NA	0.125218	NA	NA	NA	NA	NA	NA	NA	-0.198779	NA	NA	0	1	1	10
chr2:223880232-223881941	WDFY1	NA	NA	NA	NA	NA	NA	NA	NA	NA	NA	NA	NA	NA	-0.0298566	NA	NA	NA	NA	NA	NA	NA	NA	NA	NA	NA	NA	NA	NA	NA	NA	NA	NA	NA	1	0	1	1
chrX:153953090-153953606	HCFC1	NA	NA	NA	NA	NA	NA	NA	NA	NA	NA	NA	NA	NA	-0.00840786	NA	NA	NA	NA	NA	NA	NA	NA	NA	NA	NA	NA	NA	NA	NA	NA	NA	NA	NA	1	0	1	1
chr4:48851975-48857212	OCIAD1	NA	NA	NA	NA	NA	NA	NA	NA	NA	NA	NA	NA	NA	-0.0495179	NA	NA	NA	NA	NA	NA	NA	NA	NA	NA	NA	NA	NA	NA	NA	NA	NA	NA	NA	1	0	1	1
chr8:144754321-144754695	ZNF251	-0.42016	0.313206	-0.129315	-0.0749686	0.888356	NA	-0.861018	-0.281644	0.368638	NA	-0.462416	0.00481798	-0.42104	0.770612	0.0494168	NA	0.399676	-0.389123	0.953742	0.46066	-0.92151	0.941395	0.0329821	NA	-0.0366526	-0.0537883	0.0481459	0.393338	0.126198	0.0180266	NA	0.565001	0.229068	1	5	6	28
chr17:7565070-7565439	SENP3	NA	NA	NA	NA	NA	NA	NA	NA	NA	NA	NA	NA	NA	-0.0281425	NA	NA	NA	NA	NA	NA	NA	NA	NA	NA	NA	NA	NA	NA	NA	NA	NA	NA	NA	1	0	1	1
chr19:2246802-2246881	SF3A2	NA	NA	NA	NA	NA	NA	NA	NA	NA	NA	NA	0.00060117	-0.0636098	-0.152249	NA	NA	-0.192114	-0.887851	NA	NA	NA	NA	NA	NA	NA	NA	NA	NA	NA	NA	NA	NA	NA	0	1	1	5
chr1:33276594-33280123	ZNF362	NA	NA	NA	NA	NA	NA	NA	NA	NA	NA	NA	NA	NA	-0.0159829	NA	NA	NA	NA	NA	NA	NA	NA	NA	NA	NA	NA	NA	NA	NA	NA	NA	NA	NA	1	0	1	1
chr20:17957037-17968374	SNX5	NA	NA	NA	NA	NA	NA	NA	NA	NA	NA	NA	NA	NA	-0.0126366	NA	NA	NA	NA	NA	NA	NA	NA	NA	NA	NA	NA	NA	NA	NA	NA	NA	NA	NA	1	0	1	1
chr12:88053746-88054339	CEP290	-0.288309	NA	-0.0124312	NA	NA	NA	NA	0.414914	NA	NA	NA	-0.0561268	0.242313	NA	NA	NA	NA	NA	NA	NA	NA	NA	NA	NA	NA	NA	NA	NA	0.363359	NA	NA	NA	NA	1	0	1	6
chr2:55028220-55049744	RTN4	NA	NA	NA	NA	NA	NA	NA	NA	NA	NA	NA	NA	NA	-0.00073275	NA	NA	NA	NA	NA	NA	NA	NA	NA	NA	NA	NA	NA	NA	NA	NA	NA	NA	NA	1	0	1	1
chr1:37475939-37480289	ZC3H12A	NA	-0.271998	-0.720774	-0.624575	-0.197846	NA	0.702486	0.559918	NA	-0.548482	NA	NA	NA	0.23398	NA	NA	-0.274284	-0.427242	NA	0.479804	-0.582304	NA	0.0503472	NA	NA	NA	0.0049419	NA	NA	NA	NA	NA	NA	0	1	1	14
chr11:118491318-118491743	KMT2A	NA	NA	NA	NA	NA	NA	NA	NA	NA	NA	NA	NA	NA	-0.0267228	NA	NA	NA	NA	NA	NA	NA	NA	NA	NA	NA	NA	NA	NA	NA	NA	NA	NA	NA	1	0	1	1
chr2:200889391-200891968	NIF3L1	NA	NA	0.253415	0.190635	0.539589	NA	NA	0.915341	-0.787194	-0.115445	0.0645049	0.167596	-0.815428	NA	-0.120603	NA	-0.560865	-0.897068	0.218355	-0.384111	NA	0.499729	NA	NA	NA	0.00237637	0.202447	0.748476	-0.439161	-0.438526	NA	-0.38504	NA	0	1	1	21
chr22:19971335-19971885	ARVCF	NA	NA	-0.214522	NA	-0.835119	NA	NA	0.698688	-0.0788061	NA	NA	NA	-0.0589849	NA	0.0192296	NA	NA	NA	NA	0.380877	NA	NA	0.0852286	NA	NA	NA	0.155335	-0.262158	0.404027	NA	0.248747	0.0706574	NA	0	1	1	13
chr9:137430843-137431074	NOXA1	-0.769069	0.041844	NA	-0.395433	0.547424	0.571004	NA	0.143983	0.51495	NA	NA	0.129796	-0.0510744	NA	0.193704	0.245317	-0.190426	0.23661	0.527021	0.122001	0.840863	-0.647387	0.942411	0.587767	NA	NA	0.0999465	NA	NA	NA	0.0189921	NA	NA	0	2	2	21
[truncated: 18,576 more rows]

## Sheet: Table S5
Table S5. Cancer hallmarks associated GO enrichment for survival associated IR events.
[truncated: 36 more rows]

[truncated: 2 more sheets: Table S6, Table S7]
